# Supplementary material for: Enhancing CO2-Valorization Using Clostridium autoethanogenum for Sustainable Fuel and Chemicals Production
Source: Front Bioeng Biotechnol. 2020 Mar 27;8:204. doi: 10.3389/fbioe.2020.00204 (PMC7135887; doi:10.3389/fbioe.2020.00204)
Supplement: Supplementary file 1 [file Table_1.XLSX]

## Sheet: Table S10
Table S10 | Summary of low biomass concentration in silico analysis of experimental data and 'optimal' growth predictions with the GEM iCLAU786.
Complete results for all fluxes are in Table S11 with metabolites listed in Table S12. See comments for details (e.g. simulation parameters for each SIMx). BC - biomass concentration	First objective function: maximising ATP dissipation																Second objective function: maximising biomass														Second objective function: maximising biomass + additional constraints
SIM1-15, 27-37, and 49-51 are from Valgepea et al. (2018)	CO				Syngas		CO+H2			CO/CO2/H2		CO2+H2			CO/CO2/H2		CO				CO+H2			CO/CO2/H2		CO2+H2			CO/CO2/H2		CO+H2			CO/CO2/H2		CO2+H2			CO/CO2/H2
	SIM 1	SIM 2	SIM 3	SIM 4	SIM 9	SIM 10	SIM 13	SIM 14	SIM 15	SIM 20	SIM 21	SIM 22	SIM 23	SIM 24	SIM 25	SIM 26	SIM 27	SIM 28	SIM 29	SIM 30	SIM 35	SIM 36	SIM 37	SIM 42	SIM 43	SIM 44	SIM 45	SIM 46	SIM 47	SIM 48	SIM 49	SIM 50	SIM 51	SIM 56	SIM 57	SIM 58	SIM 59	SIM 60	SIM 61	SIM 62
Specific uptake rate (mmol/gDCW/h)
CO	26.8125	26.1606	25.9857	26.8002	22.388	21.4227	22.9408	23.0868	23.544	4	3.43	0	0	0	1.36	1.65	26.8125	26.1606	25.9857	26.8002	22.9408	23.0868	23.544	4	3.43	0	0	0	1.36	1.65	22.9408	23.0868	23.544	4	3.43	0	0	0	1.36	1.65
H2	-0.58	-0.55	-0.61	-0.56	13.8672	13.0647	37.2551	36.4694	38.4579	104.904	124.712	50.1704	53.8272	58.6456	58.968	67.2899	-0.58	-0.55	-0.61	-0.56	37.2551	36.4694	38.4579	104.904	125.76	50.1704	53.8272	58.6456	58.968	67.2899	37.2551	36.4694	38.4579	104.904	125.76	50.1704	53.8272	58.6456	58.968	67.2899
Cysteine	0.21	0.22	0.23	0.24	0.23	0.21	0.22	0.23	0.2	0.27	0.27	0.27	0.34	0.27	0.27	0.27	0.21	0.22	0.23	0.24	0.22	0.23	0.2	0.27	0.27	0.27	0.34	0.27	0.27	0.27	0.22	0.23	0.2	0.27	0.27	0.27	0.34	0.27	0.27	0.27
Specific production rate (mmol/gDCW/h)
Acetate	3.22	3.26	2.89	3.33	6.56	6.08	0.96	1.02	1.03	9.45	10.8	4.66	4.23	5.19	3.18	4.43	5.531	5.42116	5.19592	5.5965	4.07182	4.65537	4.04663	9.36895	9.05169	4.59074	4.06976	5.27225	3.0748	4.41477	2.17141	2.01235	2.26284	9.36895	9.05169	4.59074	4.06976	5.27225	3.0748	4.41477
Ethanol	1.34	1.23	1.28	1.3	1.24	1.24	8.93	8.85	9.19	11.44	13.68	5.15	6.09	6.24	7.73	8.38	6.24089e-11	7.67006e-11	-2.83655e-11	-2.95484e-11	6.98963	6.52087	7.30053	11.6197	15.0956	5.27158	6.2744	6.25998	7.93395	8.50102	8.27179	8.30405	8.50401	11.6197	15.0956	5.27158	6.2744	6.25998	7.93395	8.50102
CO2	16.62	16.09	16.51	16.47	5.67	5.55	2.05	2.32	1.96	-38.64	-46.648	-19.65	-20.4392	-22.9026	-20.7018	-24.1535	13.8979	13.5594	13.5204	13.8948	-1.17363e-11	-1.09955e-12	3.85966e-11	-38.64	-46.648	-19.65	-20.4392	-22.9026	-20.7018	-24.1535	1.28045	1.7808	1.20188	-38.64	-46.648	-19.65	-20.4392	-22.9026	-20.7018	-24.1535
2,3-BDO	0	0	0	0	0	0	0	0	0	0	0	0	0	0	0	0	0	0	0	0	0	0	0	0	0	0	0	0	0	0	0	0	0	0	0	0	0	0	0	0
Formate	0	0	0	0	0.00448803	0.0644609	0	0.021088	0	0	0	0	0	0	0	0	0	0	0	0	0	0	0	0	0	0	0	0	0	0	-5.5543e-12	-6.8891e-12	2.32817e-12	0	0	0	0	0	0	0
Specific growth rate (h-1)	0.041	0.041	0.041	0.042	0.041	0.042	0.041	0.041	0.041	0.042	0.042	0.02	0.0196	0.0192	0.021	0.021	0.0809629	0.0788829	0.0901211	0.079326	0.0481967	0.04645	0.0472766	0.0480286	0.0477593	0.023981	0.0251395	0.0211374	0.0278602	0.0255002	0.0467632	0.0444563	0.0459311	0.0480286	0.0477593	0.023981	0.0251395	0.0211374	0.0278602	0.0255002
Maintenance ATP costs (mmol/gDCW/h)	3.1935	3.14392	2.46994	3.3231	6.19392	5.71886	9.42396	9.48201	9.78792	14.4511	17.2645	6.51501	7.04863	7.93645	7.88889	9.36723	3.1935	3.14392	2.46994	3.3231	9.42396	9.48201	9.78792	14.4511	17.2645	6.51501	7.04863	7.93645	7.88889	9.36723	9.42396	9.48201	9.78792	14.4511	17.2645	6.51501	7.04863	7.93645	7.88889	9.36723
Average & standard deviation	3.03261	0.38265			5.95639	0.33592	9.56463	0.195545		15.8578	1.98938	7.1667	0.718035		8.62806	1.04535
ATP producing reactions (mmol/gDCW/h)
ATPase	7.54811	7.36727	7.32447	7.54629	8.53324	8.12442	11.808	11.7854	12.1608	16.9329	19.6932	7.61589	8.1525	8.87851	9.19452	10.5384	7.69755	7.51687	7.48723	7.70185	12.0102	11.9566	12.3406	16.9775	19.7753	7.6413	8.17238	8.89717	9.24104	10.582	11.9267	11.8405	12.2623	16.9775	19.7753	7.6413	8.17238	8.89717	9.24104	10.582
Acetate kinase	4.51957	4.44957	4.12957	4.58858	7.75957	7.27858	9.84957	9.82957	10.1796	20.8486	24.4386	9.79028	10.3007	11.4111	10.8893	12.7893	5.45116	5.34337	5.10705	5.51827	11.0139	11.1304	11.3005	20.9413	24.6647	9.83868	10.3194	11.5114	10.9813	12.8906	10.3971	10.2726	10.7216	20.9413	24.6647	9.83868	10.3194	11.5114	10.9813	12.8906
Total specific ATP production rate (mmol/gDCW/h)	12.0677	11.8168	11.454	12.1349	16.2928	15.403	21.6576	21.615	22.3403	37.7815	44.1318	17.4062	18.4532	20.2896	20.0838	23.3277	13.1487	12.8602	12.5943	13.2201	23.0241	23.087	23.6411	37.9188	44.4399	17.48	18.4918	20.4086	20.2223	23.4726	22.3238	22.113	22.9838	37.9188	44.4399	17.48	18.4918	20.4086	20.2223	23.4726
Maintenance ATP costs from total ATP production (%)	0.264632	0.266054	0.215639	0.273848	0.380163	0.371282	0.435135	0.438678	0.438128	0.382491	0.391203	0.374293	0.381974	0.391159	0.392798	0.40155	0.242875	0.244468	0.196116	0.251367	0.409308	0.410708	0.414021	0.381106	0.38849	0.372713	0.381177	0.388879	0.390108	0.399071	0.422148	0.428797	0.425862	0.381106	0.38849	0.372713	0.381177	0.388879	0.390108	0.399071
Average & standard deviation	0.255043	0.02658			0.375722	0.00627977	0.437313	0.00190688		0.386847	0.00616007	0.382475	0.00844393		0.397174	0.00618822
Main ATP consuming reactions (mmol/gDCW/h)
Tetrahydrofolate ligase	4.99324	4.93248	4.63252	5.0674	8.21723	7.75659	10.3406	10.2513	10.6708	21.2493	24.9398	9.85758	10.2896	11.472	11.0414	12.9181	6.23949	6.09605	5.98831	6.25642	11.3882	11.4732	11.6835	21.2635	24.9836	9.86438	10.2894	11.502	11.0548	12.9351	10.7537	10.5907	11.0879	21.2635	24.9836	9.86438	10.2894	11.502	11.0548	12.9351
Oxaloacetate carboxy-lyase	0.131836	0.131836	0.131836	0.135052	0.131836	0.135052	0.131836	0.131836	0.131836	0.135052	0.135052	0.0643102	0.063024	0.0617378	0.0675258	0.0675258	0	0	0.289785	0	0	0	0	0.154437	0.153571	0	0	0	0	0	0	0	0	0	0.153571	0	0	0.0679675	0.0895847	0
1,3-Bisphospho-D-glycerate forming	0.115792	0.115792	0.115792	0.118616	0.115792	0.118616	0.115792	0.115792	0.115792	0.118616	0.118616	0.0564838	0.0553541	0.0542244	0.059308	0.059308	0.228654	0.22278	0.254519	0.224032	0.136117	0.131183	0.133518	0.135642	0.134881	0.0677268	0.0709988	0.059696	0.0786824	0.0720173	0.132068	0.125553	0.129718	0.135642	0.134881	0.0677268	0.0709988	0.059696	0.0786824	0.0720173
Carbon-dioxide ligase	0.233534	0.233534	0.233534	0.23923	0.233534	0.23923	0.233534	0.233534	0.233534	0.23923	0.23923	0.113919	0.111641	0.109362	0.119615	0.119615	0.200824	0.195665	0.513326	0.196764	0.11955	0.115217	0.117267	0.273569	0.272035	0.0594836	0.0623573	0.0524302	0.0691058	0.0632519	0.115994	0.110272	0.11393	0.119133	0.272035	0.0594836	0.0623573	0.120398	0.158691	0.0632519
Ammonia ligase	0.0591806	0.0591806	0.0591806	0.060624	0.0591806	0.060624	0.0591806	0.0591806	0.0591806	0.060624	0.060624	0.0288686	0.0282912	0.0277138	0.030312	0.030312	0.116864	0.113862	0.130083	0.114501	0.0695686	0.0670472	0.0682404	0.0693259	0.0689372	0.0346148	0.0362871	0.0305103	0.0402142	0.0368077	0.0674994	0.0641695	0.0662982	0.0693259	0.0689372	0.0346148	0.0362871	0.0305103	0.0402142	0.0368077
CMP phosphotransferase	0.0325401	0.0325401	0.0325401	0.0333338	0.0325401	0.0333338	0.0325401	0.0325401	0.0325401	0.0333338	0.0333338	0.0158732	0.0155558	0.0152383	0.0166669	0.0166669	0.0642571	0.0626063	0.0715256	0.062958	0.0382519	0.0368655	0.0375216	0.0381185	0.0379048	0.0190328	0.0199523	0.0167759	0.0221116	0.0202385	0.0371142	0.0352833	0.0364537	0.0381185	0.0379048	0.0190328	0.0199523	0.0167759	0.0221116	0.0202385
Threonine biosynthesis	0.0301686	0.0301686	0.0301686	0.0309044	0.0301686	0.0309044	0.0301686	0.0301686	0.0301686	0.0309044	0.0309044	0.0147164	0.0144221	0.0141277	0.0154522	0.0154522	0.059574	0.0580436	0.0663128	0.0583696	0.0354641	0.0341788	0.034787	0.0353404	0.0351422	0.0176456	0.0184981	0.0155533	0.0205001	0.0187635	0.0344093	0.0327118	0.033797	0.0353404	0.0351422	0.0176456	0.0184981	0.0155533	0.0205001	0.0187635
Aspartate degradation, Lysine, Threonine synthesis	0.0500187	0.0500187	0.0500187	0.0512386	0.0500187	0.0512386	0.0500187	0.0500187	0.0500187	0.0512386	0.0512386	0.0243993	0.0239114	0.0234234	0.0256193	0.0256193	0.098772	0.0962345	0.109945	0.0967751	0.0587984	0.0566674	0.0576759	0.0585934	0.0582648	0.029256	0.0306694	0.0257869	0.0339885	0.0311094	0.0570496	0.0542352	0.0560344	0.0585934	0.0582648	0.029256	0.0306694	0.0257869	0.0339885	0.0311094
ATP Balance (Consumption/Production)	0.73252	0.738732	0.6771	0.746568	0.924593	0.918292	0.942746	0.94316	0.945006	0.962625	0.971482	0.958922	0.9565	0.971644	0.959219	0.969654	0.775889	0.776748	0.785575	0.781606	0.92381	0.926772	0.927215	0.962045	0.967796	0.950067	0.950519	0.962304	0.949857	0.960459	0.923758	0.926828	0.927265	0.953899	0.967796	0.950067	0.950519	0.968964	0.958717	0.960459
Ferredoxin involving reactions (mmol/gDCW/h)
Methylene reductase	4.96618	4.90542	4.60546	5.03968	8.19016	7.72887	10.3135	10.2242	10.6437	21.2216	24.912	9.84438	10.2767	11.4593	11.0275	12.9042	6.18605	6.04398	5.92882	6.20406	11.3564	11.4425	11.6523	21.2318	24.952	9.84855	10.2728	11.4881	11.0364	12.9182	10.7228	10.5614	11.0576	21.2318	24.952	9.84855	10.2728	11.4881	11.0364	12.9182
CO dehydrogenase	21.8519	21.2608	21.3858	21.7663	14.2034	13.6996	12.6329	12.8682	12.9059	-17.2159	-21.4763	-9.84165	-10.274	-11.4567	-9.66465	-11.2513	20.6375	20.1274	20.0692	20.607	11.591	11.6506	11.8982	-17.2252	-21.5155	-9.84528	-10.2693	-11.4852	-9.67262	-11.2648	12.2243	12.5315	12.4927	-17.2252	-21.5155	-9.84528	-10.2693	-11.4852	-9.67262	-11.2648
NADP-dependent electron-bifurcating [FeFe]-hydrogenase	-0.29	-0.275	-0.305	-0.28	2.82278	2.62187	13.4573	13.0986	13.8936	41.8274	49.8862	20.1564	21.7688	23.5868	23.9633	27.1859	-0.29	-0.275	-0.305	-0.28	12.9335	12.4982	13.3873	52.452	62.356	25.0852	26.9136	29.3228	29.484	33.645	13.2507	12.9394	13.685	41.8203	49.8643	20.153	21.7689	23.5718	23.9566	27.1774
Average & standard deviation of CO dehydrogenase from total Fdred production	0.824507	0.00555262			0.566442	0.00449663	0.349088	0.00572846		-0.389194	0.0191956	-0.481923	0.00876955		-0.385876	0.00603772
PFOR	-0.301399	-0.310639	-0.330679	-0.302342	-0.285384	-0.301534	-0.318719	-0.24945	-0.318915	-0.224262	-0.32471	0.0167324	0.0933978	0.01978	-0.063851	-0.040531	-0.448139	-0.421231	-0.502585	-0.404833	-0.171786	-0.147587	-0.184307	-0.12042	-0.118231	0.0750613	0.135643	0.0981764	0.0435275	0.0627118	-0.160133	-0.131381	-0.173369	-0.12042	-0.118231	0.0750613	0.135643	0.0981764	0.0435275	0.0627118
Nfn Complex	-5.51354	-5.37642	-5.5889	-5.45884	-2.89894	-2.774	1.24635	1.22191	1.3396	9.90362	12.1468	4.92855	5.45593	5.94439	6.14957	6.90828	-5.20729	-5.08238	-5.06969	-5.20725	0.544806	0.292914	0.628404	10.0514	12.2146	5.03097	5.62096	5.93498	6.31921	7.00064	1.02746	0.964175	1.08144	10.0514	12.2146	5.03097	5.62096	5.93498	6.31921	7.00064
Aldehyde ferredoxin oxidoreductase (AOR)	-1.31942	-1.20942	-1.25942	-1.27892	-1.21942	-1.21892	-8.90942	-8.82942	-9.16942	-11.4189	-13.6589	-5.13996	-6.08016	-6.23036	-7.71946	-8.36946	0.0406434	0.0395992	0.0452408	0.0398216	-6.96544	-6.49755	-7.2768	-11.5956	-13.777	-5.25954	-6.26178	-6.24936	-7.91997	-8.48822	-8.24832	-8.28173	-8.48096	-11.5956	-13.777	-5.25954	-6.26178	-6.24936	-7.91997	-8.48822
Rnf Complex	-16.8972	-16.5285	-16.1911	-16.9522	-20.8126	-19.7558	-28.4219	-28.334	-29.2945	-44.0936	-51.485	-19.9645	-21.2406	-23.3233	-23.6925	-27.3371	-17.7991	-17.3844	-17.1719	-17.8306	-29.2884	-29.2391	-30.105	-44.1622	-51.6201	-20.0028	-21.2672	-23.3585	-23.7632	-27.4061	-28.8169	-28.5833	-29.6624	-44.1622	-51.6201	-20.0028	-21.2672	-23.3585	-23.7632	-27.4061
Formate dehydrogenase (ferredoxin added)	-2.49658	-2.4662	-2.31622	-2.53366	0	0	0	0	0	0	0	0	0	0	0	0	-3.11966	-3.04794	-2.99406	-3.12813	0	0	0	-10.6317	-12.4917	-4.93217	-5.14465	-5.75099	-5.52738	-6.46751	0	0	0	0	0	0	0	0	0	0
Ferredoxin balance (mmol/gDCW/h)	-1.13687e-13	0	1.13687e-13	1.13687e-13	0	0	1.13687e-13	1.13687e-13	0	-1.13687e-13	-1.13687e-13	1.13687e-13	-1.13687e-13	0	0	0	0	1.13687e-13	1.13687e-13	0	-1.13687e-13	-1.13687e-13	0	-1.13687e-13	-2.27374e-13	-1.13687e-13	-1.13687e-13	-1.13687e-13	0	2.27374e-13	0	-1.13687e-13	1.13687e-13	0	1.13687e-13	-1.13687e-13	0	0	-1.13687e-13	0
Main NADH involving reactions (mmol/gDCW/h)
Rnf	16.8972	16.5285	16.1911	16.9522	20.8126	19.7558	28.4219	28.334	29.2945	44.0936	51.485	19.9645	21.2406	23.3233	23.6925	27.3371	17.7991	17.3844	17.1719	17.8306	29.2884	29.2391	30.105	44.1622	51.6201	20.0028	21.2672	23.3585	23.7632	27.4061	28.8169	28.5833	29.6624	44.1622	51.6201	20.0028	21.2672	23.3585	23.7632	27.4061
isopropyl malate oxidoreductase	0.00856853	0.00856853	0.00856853	0.00877752	0.00856853	0.00877752	0.00856853	0.00856853	0.00856853	0.00877752	0.00877752	0.00417977	0.00409617	0.00401258	0.00438876	0.00438876	0.0169203	0.0164856	0.0188343	0.0165782	0.0100726	0.00970751	0.00988026	0.0100374	0.00998115	0.00501174	0.00525387	0.00441747	0.00582246	0.00532924	0.00977298	0.00929085	0.00959906	0.0100374	0.00998115	0.00501174	0.00525387	0.00441747	0.00582246	0.00532924
Ethanol:NAD+ oxidoreductase	-1.34	-1.23	-1.28	-1.3	-1.24	-1.24	-8.93	-8.85	-9.19	-11.44	-13.68	-5.15	-6.09	-6.24	-7.73	-8.38	-6.24141e-11	-7.67386e-11	2.84217e-11	2.95586e-11	-6.98963	-6.52087	-7.30053	-11.6197	-13.801	-5.27158	-6.2744	-6.25998	-7.93395	-8.50102	-8.27179	-8.30405	-8.50401	-11.6197	-13.801	-5.27158	-6.2744	-6.25998	-7.93395	-8.50102
Nfn	-5.51354	-5.37642	-5.5889	-5.45884	-2.89894	-2.774	1.24635	1.22191	1.3396	9.90362	12.1468	4.92855	5.45593	5.94439	6.14957	6.90828	-5.20729	-5.08238	-5.06969	-5.20725	0.544806	0.292914	0.628404	10.0514	12.2146	5.03097	5.62096	5.93498	6.31921	7.00064	1.02746	0.964175	1.08144	10.0514	12.2146	5.03097	5.62096	5.93498	6.31921	7.00064
NAD-dependent electron-bifurcating methylenetetrahydrofolate reductase	-9.93236	-9.81084	-9.21092	-10.0794	-16.3803	-15.4577	-20.627	-20.4485	-21.2874	-42.4432	-49.8241	-19.6888	-20.5534	-22.9186	-22.055	-25.8084	-12.3721	-12.088	-11.8576	-12.4081	-22.7128	-22.8851	-23.3046	-42.4636	-49.9041	-19.6971	-20.5455	-22.9761	-22.0728	-25.8365	-21.4457	-21.1228	-22.1152	-42.4636	-49.9041	-19.6971	-20.5455	-22.9761	-22.0728	-25.8365
D-Glyceraldehyde-3-phosphate:NAD+ oxidoreductase(phosphorylating)	-0.115792	-0.115792	-0.115792	-0.118616	0.115792	0.118616	-0.115792	-0.115792	-0.115792	-0.118616	-0.118616	-0.0564838	-0.0553541	-0.0542244	-0.059308	-0.059308	-0.228654	-0.22278	-0.254519	-0.224032	-0.136117	-0.131183	-0.133518	-0.135642	-0.134881	-0.0677268	-0.0709988	-0.059696	-0.0786824	-0.0720173	-0.132068	-0.125553	-0.129718	-0.135642	-0.134881	-0.0677268	-0.0709988	-0.059696	-0.0786824	-0.0720173
L-Homoserine:NAD+ oxidoreductase c0	-0.0318317	-0.0318317	-0.0318317	-0.0326081	0.0318317	0.0326081	-0.0318317	-0.0318317	-0.0318317	-0.0326081	-0.0326081	-0.0155277	-0.0152171	-0.0149065	-0.016304	-0.016304	-0.0628581	-0.0612433	-0.0699684	-0.0615873	-0.0374191	-0.0360629	-0.0367047	-0.0372886	-0.0370795	-0.0186184	-0.0195179	-0.0164107	-0.0216302	-0.0197979	-0.0363062	-0.0345151	-0.0356601	-0.0372886	-0.0370795	-0.0186184	-0.0195179	-0.0164107	-0.0216302	-0.0197979
NADH balance (mmol/gDCW/h)	-0.0277888	-0.0277888	-0.0277888	-0.0284666	0.449557	0.444101	-0.0277888	0.118377	0.0176294	-0.0284666	-0.014709	-0.0135555	-0.0132844	0.0439711	-0.0142333	-0.0142333	-0.0548746	-0.0534649	-0.0610819	-0.0537652	-0.0326666	-0.0314826	-0.0320429	-0.0325526	-0.0323701	-0.0162537	-0.017039	-0.0143264	-0.0188829	-0.0172834	-0.031695	-0.0301314	-0.0311309	-0.0325526	-0.0323701	-0.0162537	-0.017039	-0.0143264	-0.0188829	-0.0172834
Main NADPH involving reactions (mmol/gDCW/h)
NADP-dependent electron-bifurcating [FeFe]-hydrogenase (Hyt)	-0.29	-0.275	-0.305	-0.28	2.82278	2.62187	13.4573	13.0986	13.8936	41.8274	49.8862	20.1564	21.7688	23.5868	23.9633	27.1859	-0.29	-0.275	-0.305	-0.28	12.9335	12.4982	13.3873	52.452	62.356	25.0852	26.9136	29.3228	29.484	33.645	13.2507	12.9394	13.685	41.8203	49.8643	20.153	21.7689	23.5718	23.9566	27.1774
Nfn	11.0271	10.7528	11.1778	10.9177	2.89894	2.774	-2.49269	-2.44381	-2.6792	-19.8072	-24.2936	-9.8571	-10.9119	-11.8888	-12.2991	-13.8166	10.4146	10.1648	10.1394	10.4145	-1.08961	-0.585828	-1.25681	-20.1027	-24.4292	-10.0619	-11.2419	-11.87	-12.6384	-14.0013	-2.05493	-1.92835	-2.16289	-20.1027	-24.4292	-10.0619	-11.2419	-11.87	-12.6384	-14.0013
L-Glutamate: NADP+ oxidoreductase (deaminating)	-0.270881	-0.280501	-0.295521	-0.286723	-0.181824	-0.186259	-0.284541	-0.181824	-0.25193	-0.262683	-0.306028	-0.13404	-0.130559	-0.103727	-0.174702	-0.163042	-0.327787	-0.319366	-0.364865	-0.32116	-0.19513	-0.188058	-0.191404	-0.194449	-0.193359	-0.0970894	-0.10178	-0.0855769	-0.112795	-0.10324	-0.189326	-0.179986	-0.185957	-0.194449	-0.193359	-0.0970894	-0.10178	-0.0855769	-0.112795	-0.10324
5,10-methylenetetrahydrofolate: NADP+ oxidoreductase	-4.97485	-4.91409	-4.61413	-5.04856	-8.19883	-7.73775	-10.3222	-10.2329	-10.6524	-21.2305	-24.9209	-9.84861	-10.2808	-11.4633	-11.032	-12.9086	-6.20317	-6.06066	-5.94788	-6.22083	-11.3666	-11.4524	-11.6623	-21.2419	-24.9621	-9.85362	-10.2781	-11.4925	-11.0423	-12.9236	-10.7327	-10.5708	-11.0673	-21.2419	-24.9621	-9.85362	-10.2781	-11.4925	-11.0423	-12.9236
L-Aspartate-4-semialdehyde:NADP+ oxidoreductase (phosphorylating)	-0.0500187	-0.0500187	-0.0500187	-0.0512386	-0.0500187	-0.0512386	-0.0500187	-0.0500187	-0.0500187	-0.0512386	-0.0512386	-0.0243993	-0.0239114	-0.0234234	-0.0256193	-0.0256193	-0.098772	-0.0962345	-0.109945	-0.0967751	-0.0587984	-0.0566674	-0.0576759	-0.0585934	-0.0582648	-0.029256	-0.0306694	-0.0257869	-0.0339885	-0.0311094	-0.0570496	-0.0542352	-0.0560344	-0.0585934	-0.0582648	-0.029256	-0.0306694	-0.0257869	-0.0339885	-0.0311094
Formate dehydrogenase	-2.49658	-2.4662	-2.31622	-2.53366	0	0	0	0	0	0	0	0	0	0	0	0	-3.11966	-3.04794	-2.99406	-3.12813	0	0	0	-10.6317	-12.4917	-4.93217	-5.14465	-5.75099	-5.52738	-6.46751	0	0	0	0	0	0	0	0	0	0
NADPH balance (mmol/gDCW/h)	2.94475	2.76703	3.59691	2.7175	-2.70895	-2.57938	0.30789	0.189995	0.260101	0.475744	0.314399	0.292278	0.421641	0.107554	0.431912	0.272072	0.375184	0.365545	0.417623	0.367598	0.223345	0.21525	0.219081	0.222566	0.221318	0.111128	0.116497	0.0979511	0.129105	0.118168	0.216702	0.206012	0.212846	0.222566	0.221318	0.111128	0.116497	0.0979511	0.129105	0.118168

## Sheet: Table S11
Table S11 | Complete results of in silico analysis of experimental data and 'optimal' growth predictions with the GEM iCLAU786.
Summary of results for all fluxes are in Table S1 with metabolites listed in Table S3. Flux units are mmol/gDCW/hr. See comments for details (e.g. simulation parameters for each SIMx). BC, biomass concentration
SIM1-19, 27-41, and 49-55 are from Valgepea et al. (2018)													First objective function: maximising ATP dissipation
													CO LowBC						CO HighBC						Syngas LowBC				Syngas HighBC				CO+H2 LowBC					CO+H2 HighBC						CO/CO2/H2 D = 1				CO2+H2
Rxn name	Rxn description	Formula	Gene-reaction association	Genes	Proteins	Subsystem	Reversible	LB	UB	EC Number	Reactions		SIM 1	SIM 2	SIM 3	SIM 4	Av.	±	SIM 5	SIM 6	SIM 7	SIM 8	Av.	±	SIM 9	SIM 10	Av.	±	SIM 11	SIM 12	Av.	±	SIM 13	SIM 14	SIM 15	Av.	±	SIM 16	SIM 17	SIM 18	SIM 19	Av.	±	SIM 20	SIM 21	Av.	±	SIM 22	SIM 23
rxn12008_c0	rxn12008 c0	S_cpd00113[c] + S_cpd02590[c] -> S_cpd00012[c] + S_cpd02557[c]	(CAETHG_RS09090)	CAETHG_RS09090		Ubiqui, Menaqui and Phylloqui Biosynthesis	0	0	1000		Isopentenyldiphosphate + all-trans-Heptaprenyl diphosphate -> PPi + Farnesylfarnesylgeraniol		0	0	0	0	0	0	0	0	0	0	0	0	0	0	0	0	0	0	0	0	0	0	0	0	0	0	0	0	0	0	0	0	0	0	0	0	0
rxn00541_c0	L-Threonine acetaldehyde-lyase c0	S_cpd00161[c] -> S_cpd00033[c] + S_cpd00071[c]	(CAETHG_RS03265)	CAETHG_RS03265		Threonine degradation	0	0	1000	4.1.2.5/4.1.2.48	L-Threonine -> Glycine + Acetaldehyde		0.0205806	0.0205806	0.0205806	0.0210825	0.0207061	0.000217357	0.0210825	0.0210825	0.0205806	0.0210825	0.0209571	0.000217357	0.0205806	0.0210825	0.0208316	0.000250983	0.0210825	0.0205806	0.0208316	0.000250983	0.0205806	0.0205806	0.0205806	0.0205806	8.64009e-14	0.0210825	0.0210825	0.0210825	0.0215845	0.021208	0.000217357	0.0210825	0.0210825	0.0210825	1.42109e-14	0.0100393	0.00983852
rxn00225_c0	ATP:acetate phosphotransferase c0	S_cpd00008[c] + S_cpd00196[c] <=> S_cpd00002[c] + S_cpd00029[c] + S_cpd00067[c]	(CAETHG_RS16495)	CAETHG_RS16495		Acetate Fermentation	1	-1000	1000	2.7.2.1	ADP + Acetylphosphate <=> ATP + Acetate + H+		4.51957	4.44957	4.12957	4.58858	4.42182	0.175745	5.65858	5.73858	5.70957	5.45858	5.64133	0.109326	7.75957	7.27858	7.51907	0.240493	7.94858	7.64957	7.79907	0.149507	9.84957	9.82957	10.1796	9.9529	0.160485	9.65858	9.18858	10.4586	9.6876	9.74834	0.45539	20.8486	24.4386	22.6436	1.795	9.79028	10.3007
rxn01199_c0	ATP:D-xylulose 5-phosphotransferase c0	S_cpd00002[c] + S_cpd00259[c] <=> S_cpd00008[c] + S_cpd00198[c]	((CAETHG_RS17650) or (CAETHG_RS19295) or (CAETHG_RS15945))	CAETHG_RS15945 CAETHG_RS17650 CAETHG_RS19295		Xylose Degradation	1	-1000	1000	2.7.1.17	ATP + D-Lyxulose <=> ADP + D-Xylulose5-phosphate		0	0	0	0	0	0	0	0	0	0	0	0	0	0	0	0	0	0	0	0	0	0	0	0	0	0	0	0	0	0	0	0	0	0	0	0	0
rxn10215_c0	anteisoheptadecanoyl-1-acylglycerol-3-phosphate O-acyltransferase c0	S_cpd11434[c] + S_cpd15672[c] -> S_cpd00010[c] + S_cpd15678[c]	((CAETHG_RS13530) or (CAETHG_RS08580))	CAETHG_RS08580 CAETHG_RS13530		Glycerolipid and Glycerophospholipid Metabolism	0	0	1000	2.3.1.51	fa12coa + 1-anteisoheptadecanoyl-sn-glycerol 3-phosphate -> CoA + 1,2-dianteisoheptadecanoyl-sn-glycerol 3-phosphate		0	0	0	0	0	0	0	0	0	0	0	0	0	0	0	0	0	0	0	0	0	0	0	0	0	0	0	0	0	0	0	0	0	0	0	0	0
rxn02483_c0	4-Carboxymuconolactone carboxy-lyase c0	S_cpd00067[c] + S_cpd00938[c] -> S_cpd00011[c] + S_cpd02255[c]	((CAETHG_RS03005) or (CAETHG_RS07260))	CAETHG_RS03005 CAETHG_RS07260		Protocatechuate Degradation	0	0	1000	4.1.1.44	H+ + 4-Carboxymuconolactone -> CO2 + 3-oxoadipate-enol-lactone		0	0	0	0	0	0	0	0	0	0	0	0	0	0	0	0	0	0	0	0	0	0	0	0	0	0	0	0	0	0	0	0	0	0	0	0	0
rxn00802_c0	N-(L-Argininosuccinate) arginie-lyase c0	S_cpd02152[c] <=> S_cpd00051[c] + S_cpd00106[c]	(CAETHG_RS13585)	CAETHG_RS13585		Arginine biosynthesis	1	-1000	1000	4.3.2.1	L-Argininosuccinate <=> L-Arginine + Fumarate		0.00188462	0.00188462	0.00188462	0.00193059	0.00189611	1.9904e-05	0.00193059	0.00193059	0.00188462	0.00193059	0.0019191	1.9904e-05	0.00188462	0.00193059	0.00190761	2.29832e-05	0.00193059	0.00188462	0.00190761	2.29832e-05	0.00188462	0.00188462	0.00188462	0.00188462	0	0.00193059	0.00193059	0.00193059	0.00197656	0.00194208	1.9904e-05	0.00193059	0.00193059	0.00193059	0	0.000919328	0.000900942
rxn03638_c0	Acetyl-CoA:D-glucosamine-1-phosphate N-acetyltransferase c0	S_cpd00022[c] + S_cpd03671[c] -> S_cpd00010[c] + S_cpd00067[c] + S_cpd02611[c]	((CAETHG_RS09810) and (CAETHG_RS09810))	CAETHG_RS09810		UDP-N-acetylmuramate biosynthesis	0	0	1000	2.3.1.157	Acetyl-CoA + D-Glucosamine1-phosphate -> CoA + H+ + N-Acetyl-D-glucosamine1-phosphate		0.00974325	0.00974325	0.00974325	0.00998089	0.00980266	0.000102901	0.00998089	0.00998089	0.00974325	0.00998089	0.00992148	0.000102901	0.00974325	0.00998089	0.00986207	0.00011882	0.00998089	0.00974325	0.00986207	0.00011882	0.00974325	0.00974325	0.00974325	0.00974325	0	0.00998089	0.00998089	0.00998089	0.0102185	0.0100403	0.000102901	0.00998089	0.00998089	0.00998089	0	0.0047528	0.00465775
rxn06078_c0	O-Acetyl-L-homoserine acetate-lyase (adding methanethiol) c0	S_cpd00268[c] + S_cpd00790[c] + S_cpd11421[c] -> S_cpd00029[c] + S_cpd00081[c] + S_cpd00135[c] + S_cpd11420[c]	((CAETHG_RS13550) or (CAETHG_RS19855))	CAETHG_RS13550 CAETHG_RS19855		Sulfate Assimilation	0	0	1000	2.5.1.49	H2S2O3 + O-Acetyl-L-homoserine + trdrd -> Acetate + Sulfite + Homocysteine + trdox		0	0	0	0	0	0	0	0	0	0	0	0	0	0	0	0	0	0	0	0	0	0	0	0	0	0	0	0	0	0	0	0	0	0	0	0	0
rxn00868_c0	Butanoyl-CoA:(acceptor) 2,3-oxidoreductase c0	S_cpd00004[c] + S_cpd00067[c] + S_cpd00650[c] -> S_cpd00003[c] + S_cpd00120[c]	((CAETHG_RS08650) or (CAETHG_RS08660))	CAETHG_RS08650 CAETHG_RS08660		Butyrate Synthesis	0	0	1000	1.3.8.1	NADH + H+ + Crotonyl-CoA -> NAD + Butyryl-CoA		0	0	0	0	0	0	0	0	0	0	0	0	0	0	0	0	0	0	0	0	0	0	0	0	0	0	0	0	0	0	0	0	0	0	0	0	0
rxn01675_c0	dTTP:alpha-D-glucose-1-phosphate thymidylyltransferase c0	S_cpd00089[c] + S_cpd00357[c] <=> S_cpd00012[c] + S_cpd00626[c]	((CAETHG_RS12970) or (CAETHG_RS12870))	CAETHG_RS12870 CAETHG_RS12970		dTDP-L-rhamnoase synthesis	1	-1000	1000	2.7.7.24	Glucose-1-phosphate + TTP <=> PPi + dTDPglucose		0	0	0	0	0	0	0	0	0	0	0	0	0	0	0	0	0	0	0	0	0	0	0	0	0	0	0	0	0	0	0	0	0	0	0	0	0
rxn12636_c0	aminopeptidase c0	S_cpd00001[c] + S_cpd00067[c] + S_cpd11590[c] <=> S_cpd00035[c] + S_cpd00060[c]	(((CAETHG_RS04585) or (CAETHG_RS15660)) or (CAETHG_RS07155) or (CAETHG_RS03545))	CAETHG_RS03545 CAETHG_RS04585 CAETHG_RS07155 CAETHG_RS15660		Protein Degradation	1	-1000	1000		H2O + H+ + met-L-ala-L <=> L-Alanine + L-Methionine		0	0	0	0	0	0	0	0	0	0	0	0	0	0	0	0	0	0	0	0	0	0	0	0	0	0	0	0	0	0	0	0	0	0	0	0	0
rxn12644_c0	aminopeptidase c0	S_cpd00001[c] + S_cpd11582[c] <=> S_cpd00035[c] + S_cpd00161[c]	(((CAETHG_RS04585) or (CAETHG_RS15660)) or (CAETHG_RS03545) or (CAETHG_RS07155))	CAETHG_RS03545 CAETHG_RS04585 CAETHG_RS07155 CAETHG_RS15660		Protein Degradation	1	-1000	1000		H2O + ala-L-Thr-L <=> L-Alanine + L-Threonine		0	0	0	0	0	0	0	0	0	0	0	0	0	0	0	0	0	0	0	0	0	0	0	0	0	0	0	0	0	0	0	0	0	0	0	0	0
rxn05536_c0	Dipeptide transport via ABC system (met-ala) c0	S_cpd00001[c] + S_cpd00002[c] + S_cpd11590[e] -> S_cpd00008[c] + S_cpd00009[c] + S_cpd00067[c] + S_cpd11590[c]	(CAETHG_RS07520)	CAETHG_RS07520		Dipeptide ABC transporter	0	0	1000		H2O + ATP + met-L-ala-L -> ADP + Phosphate + H+ + met-L-ala-L		0	0	0	0	0	0	0	0	0	0	0	0	0	0	0	0	0	0	0	0	0	0	0	0	0	0	0	0	0	0	0	0	0	0	0	0	0
rxn05544_c0	Dipeptide transport via ABC system (ala-leu) c0	S_cpd00001[c] + S_cpd00002[c] + S_cpd11583[e] -> S_cpd00008[c] + S_cpd00009[c] + S_cpd00067[c] + S_cpd11583[c]	(CAETHG_RS07520)	CAETHG_RS07520		Dipeptide ABC transporter	0	0	1000		H2O + ATP + Ala-Leu -> ADP + Phosphate + H+ + Ala-Leu		0	0	0	0	0	0	0	0	0	0	0	0	0	0	0	0	0	0	0	0	0	0	0	0	0	0	0	0	0	0	0	0	0	0	0	0	0
rxn05549_c0	Deoxyribose transport via ABC system c0	S_cpd00001[c] + S_cpd00002[c] + S_cpd01242[e] -> S_cpd00008[c] + S_cpd00009[c] + S_cpd00067[c] + S_cpd01242[c]	((CAETHG_RS10995) and ((CAETHG_RS11000) or (CAETHG_RS08750)) and ((CAETHG_RS11005) or (CAETHG_RS08745)) and ())	CAETHG_RS08745 CAETHG_RS08750 CAETHG_RS10995 CAETHG_RS11000 CAETHG_RS11005		Transport Reactions	0	0	1000		H2O + ATP + Thyminose -> ADP + Phosphate + H+ + Thyminose		0	0	0	0	0	0	0	0	0	0	0	0	0	0	0	0	0	0	0	0	0	0	0	0	0	0	0	0	0	0	0	0	0	0	0	0	0
rxn03910_c0	2-Phospho-4-(cytidine 5'-diphospho)-2-C-methyl-D-erythritol c0	S_cpd08288[c] <=> S_cpd00046[c] + S_cpd08301[c]	(CAETHG_RS11150)	CAETHG_RS11150		Methylerythritol Phosphate Pathway	1	-1000	1000	4.6.1.2	2-phospho-4-cytidine5-diphospho-2-C-methyl-D-erythritol <=> CMP + 2-C-methyl-D-erythritol2-4-cyclodiphosphate		0	0	0	0	0	0	0	0	0	0	0	0	0	0	0	0	0	0	0	0	0	0	0	0	0	0	0	0	0	0	0	0	0	0	0	0	0
rxn05616_c0	magnesium transport in/out via permease (no H+) c0	S_cpd00254[c] <=> S_cpd00254[e]	((CAETHG_RS01345) or (CAETHG_RS14785))	CAETHG_RS01345 CAETHG_RS14785		Transport Reactions	1	-1000	1000		Mg <=> Mg		-0.000349074	-0.000349074	-0.000349074	-0.000357588	-0.000351203	3.68667e-06	-0.000357588	-0.000357588	-0.000349074	-0.000357588	-0.00035546	3.68667e-06	-0.000349074	-0.000357588	-0.000353331	4.257e-06	-0.000357588	-0.000349074	-0.000353331	4.257e-06	-0.000349074	-0.000349074	-0.000349074	-0.000349074	0	-0.000357588	-0.000357588	-0.000357588	-0.000366102	-0.000359717	3.68667e-06	-0.000357588	-0.000357588	-0.000357588	0	-0.00017028	-0.000166874
cpd00254_ext_b		S_cpd00254[e] <=>				Exchange Reactions	1	-1000	0		Mg <=>		-0.000349074	-0.000349074	-0.000349074	-0.000357588	-0.000351203	3.68667e-06	-0.000357588	-0.000357588	-0.000349074	-0.000357588	-0.00035546	3.68667e-06	-0.000349074	-0.000357588	-0.000353331	4.257e-06	-0.000357588	-0.000349074	-0.000353331	4.257e-06	-0.000349074	-0.000349074	-0.000349074	-0.000349074	0	-0.000357588	-0.000357588	-0.000357588	-0.000366102	-0.000359717	3.68667e-06	-0.000357588	-0.000357588	-0.000357588	0	-0.00017028	-0.000166874
rxn08527_c0	fumarate reductase c0	S_cpd00106[c] + S_cpd15499[c] <=> S_cpd00036[c] + S_cpd15500[c]	(((CAETHG_RS01630) and (CAETHG_RS01620)) or (() and () and () and () and () and ((CAETHG_RS14560) or (CAETHG_RS04915))) or (CAETHG_RS01620))	CAETHG_RS01620 CAETHG_RS01630 CAETHG_RS04915 CAETHG_RS14560		Citric Acid Cycle	1	-1000	1000	1.3.99.1	Fumarate + Menaquinol 8 <=> Succinate + Menaquinone 8		0	0	0	0	0	0	0	0	0	0	0	0	0	0	0	0	0	0	0	0	0	0	0	0	0	0	0	0	0	0	0	0	0	0	0	0	0
rxn12848_c0	Gly-Cys ABC transporters c0	S_cpd00001[c] + S_cpd00002[c] + S_cpd15603[e] -> S_cpd00008[c] + S_cpd00009[c] + S_cpd15603[c]	(CAETHG_RS07520)	CAETHG_RS07520		Transport Reactions	0	0	1000		H2O + ATP + Gly-Cys -> ADP + Phosphate + Gly-Cys		0	0	0	0	0	0	0	0	0	0	0	0	0	0	0	0	0	0	0	0	0	0	0	0	0	0	0	0	0	0	0	0	0	0	0	0	0
rxn00369_c0	GTP:cytidine 5'-phosphotransferase c0	S_cpd00038[c] + S_cpd00367[c] -> S_cpd00031[c] + S_cpd00046[c]	(CAETHG_RS11755)	CAETHG_RS11755		Pyrimidine conversions	0	0	1000	2.7.1.48	GTP + Cytidine -> GDP + CMP		0	0	0	0	0	0	0	0	0	0	0	0	0	0	0	0	0	0	0	0	0	0	0	0	0	0	0	0	0	0	0	0	0	0	0	0	0
rxn02212_c0	2-Dehydro-3-deoxy-D-arabino-heptonate 7-phosphate phosphate-lyase c0	S_cpd02857[c] -> S_cpd00009[c] + S_cpd00067[c] + S_cpd00699[c]	(CAETHG_RS04340)	CAETHG_RS04340		Chorismate_Synthesis	0	0	1000	4.2.3.4	DAHP -> Phosphate + H+ + 5-Dehydroquinate		0.00573255	0.00573255	0.00573255	0.00587236	0.0057675	6.05431e-05	0.00587236	0.00587236	0.00573255	0.00587236	0.00583741	6.05431e-05	0.00573255	0.00587236	0.00580246	6.99091e-05	0.00587236	0.00573255	0.00580246	6.99091e-05	0.00573255	0.00573255	0.00573255	0.00573255	0	0.00587236	0.00587236	0.00587236	0.00601218	0.00590732	6.05431e-05	0.00587236	0.00587236	0.00587236	0	0.00279636	0.00274044
rxn03419_c0	Formamidopyrimidine nucleoside triphosphate 7,8-8,9-dihydrolase c0	S_cpd00001[c] + S_cpd03518[c] <=> S_cpd00047[c] + S_cpd00067[c] + S_cpd03519[c]	(CAETHG_RS13405)	CAETHG_RS13405		Pterin metabolism|Methanopterin biosynthesis2|tRNA modification Archaea Henri|Folate Biosynthesis|Queuosine-Archaeosine Biosynthesis|Folate Biosynthesis (Phoenix Copy)|Zinc regulated enzymes|Pterin metabolism 3	1	-1000	1000	3.5.4.16	H2O + Formamidopyrimidine nucleoside triphosphate <=> Formate + H+ + 2,5-Diaminopyrimidine nucleoside triphosphate		0	0	0	0	0	0	0	0	0	0	0	0	0	0	0	0	0	0	0	0	0	0	0	0	0	0	0	0	0	0	0	0	0	0	0	0	0
rxn02160_c0	L-Histidinol-phosphate phosphohydrolase c0	S_cpd00001[c] + S_cpd00807[c] -> S_cpd00009[c] + S_cpd00067[c] + S_cpd00641[c]	(CAETHG_RS16065)	CAETHG_RS16065		Histidine Biosynthesis	0	0	1000	3.1.3.15	H2O + L-histidinol-phosphate -> Phosphate + H+ + L-Histidinol		0.000822232	0.000822232	0.000822232	0.000842286	0.000827245	8.68382e-06	0.000842286	0.000842286	0.000822232	0.000842286	0.000837272	8.68382e-06	0.000822232	0.000842286	0.000832259	1.00272e-05	0.000842286	0.000822232	0.000832259	1.00272e-05	0.000822232	0.000822232	0.000822232	0.000822232	1.0842e-19	0.000842286	0.000842286	0.000842286	0.000862341	0.0008473	8.68382e-06	0.000842286	0.000842286	0.000842286	0	0.000401089	0.000393067
rxn05614_c0	L-methionine R-oxide transport via ABC system c0	S_cpd00001[c] + S_cpd00002[c] + S_cpd11576[e] -> S_cpd00008[c] + S_cpd00009[c] + S_cpd00067[c] + S_cpd11576[c]	(((CAETHG_RS13380) or (CAETHG_RS05455)) and ((CAETHG_RS13375) or (CAETHG_RS12470)) and ())	CAETHG_RS05455 CAETHG_RS12470 CAETHG_RS13375 CAETHG_RS13380		Staphylococcal pathogenicity islands SaPI|Methionine Biosynthesis|Methionine Degradation	0	0	1000		H2O + ATP + L-methionine R-oxide -> ADP + Phosphate + H+ + L-methionine R-oxide		0	0	0	0	0	0	0	0	0	0	0	0	0	0	0	0	0	0	0	0	0	0	0	0	0	0	0	0	0	0	0	0	0	0	0	0	0
rxn10304_c0	isopentadecanoyl-lipoteichoic acid synthesis (n-24), linked, glucose substituted c0	24 S_cpd00026[c] + S_cpd15752[c] <=> 24 S_cpd00014[c] + S_cpd15761[c]	(CAETHG_RS06265)	CAETHG_RS06265		Teichoic and lipoteichoic acids biosynthesis	1	-1000	1000	2.4.1.52	24 UDP-glucose + Isopentadecanoyllipoteichoic acid (n-24), linked, unsubstituted <=> 24 UDP + Isopentadecanoyllipoteichoic acid (n-24), linked, glucose substituted		0	0	0	0	0	0	0	0	0	0	0	0	0	0	0	0	0	0	0	0	0	0	0	0	0	0	0	0	0	0	0	0	0	0	0	0	0
rxn01302_c0	L-Homoserine:NADP+ oxidoreductase c0	S_cpd00006[c] + S_cpd00227[c] <=> S_cpd00005[c] + S_cpd00067[c] + S_cpd00346[c]	((CAETHG_RS15215) or (CAETHG_RS13805))	CAETHG_RS13805 CAETHG_RS15215		Threonine biosynthesis	1	-1000	0	1.1.1.3	NADP + L-Homoserine <=> NADPH + H+ + L-Aspartate4-semialdehyde		0	0	0	0	0	0	0	0	0	0	0	0	0	0	0	0	0	0	0	0	-2.09184e-11	-8.86757e-12	-1.81899e-12	-1.0535e-11	7.88593e-12	2.17142e-11	3.86535e-12	0	2.50111e-12	7.02016e-12	8.5961e-12	0	0	0	0	0	0
rxn05422_c0	10-methyl-3-oxo-undecanoyl-ACP:NADP+ oxidoreductase c0	S_cpd00005[c] + S_cpd00067[c] + S_cpd11558[c] <=> S_cpd00006[c] + S_cpd11559[c]	((CAETHG_RS08435) or (CAETHG_RS00375) or (CAETHG_RS00860) or (CAETHG_RS04365) or (CAETHG_RS06705) or (CAETHG_RS03500) or (CAETHG_RS04680) or (CAETHG_RS09990))	CAETHG_RS00375 CAETHG_RS00860 CAETHG_RS03500 CAETHG_RS04365 CAETHG_RS04680 CAETHG_RS06705 CAETHG_RS08435 CAETHG_RS09990		mycolic acid synthesis|Fatty Acid Biosynthesis FASII	1	-1000	1000	1.1.1.0	NADPH + H+ + 10-methyl-3-oxo-undecanoyl-ACP <=> NADP + 10-methyl-3-hydroxy-undecanoyl-ACP		0	0	0	0	0	0	0	0	0	0	0	0	0	0	0	0	0	0	0	0	0	0	0	0	0	0	0	0	0	0	0	0	0	0	0	0	0
rxn00048_c0	6,7-Dimethyl-8-(1-D-ribityl)lumazine:6,7-dimethyl-8-(1-D-ribityl) c0	2 S_cpd02656[c] -> S_cpd00220[c] + S_cpd02882[c]	(CAETHG_RS01440)	CAETHG_RS01440		riboflavin to FAD|Riboflavin, FMN and FAD metabolism	0	0	1000	2.5.1.9	2 6-7-Dimethyl-8-1-D-ribityllumazine -> Riboflavin + 4-1-D-Ribitylamino-5-aminouracil		1.05534e-05	1.05534e-05	1.05534e-05	1.08108e-05	1.06178e-05	1.11457e-07	1.08108e-05	1.08108e-05	1.05534e-05	1.08108e-05	1.07464e-05	1.11457e-07	1.05534e-05	1.08108e-05	1.06821e-05	1.287e-07	1.08108e-05	1.05534e-05	1.06821e-05	1.287e-07	1.05534e-05	1.05534e-05	1.05534e-05	1.05534e-05	0	1.08108e-05	1.08108e-05	1.08108e-05	1.10682e-05	1.08751e-05	1.11457e-07	1.08108e-05	1.08108e-05	1.08108e-05	0	5.148e-06	5.04504e-06
rxn07584_c0	ATP:lipoate adenylyltransferase c0	S_cpd00002[c] + S_cpd00067[c] + S_cpd00541[c] <=> S_cpd00012[c] + S_cpd14955[c]	((CAETHG_RS05855) or (CAETHG_RS14825))	CAETHG_RS05855 CAETHG_RS14825		Dehydrogenase complexes|Glycine cleavage system|Lipoic acid metabolism	1	-1000	1000	2.7.7.63	ATP + H+ + Lipoate <=> PPi + Lipoyl-AMP		0	0	0	0	0	0	0	0	0	0	0	0	0	0	0	0	0	0	0	0	0	0	0	0	0	0	0	0	0	0	0	0	0	0	0	0	0
rxn05298_c0	GLUt4i c0	S_cpd00023[e] + S_cpd00971[e] <=> S_cpd00023[c] + S_cpd00971[c]	(CAETHG_RS12305)	CAETHG_RS12305		Transport Reactions	1	0	0		L-Glutamate + Na+ <=> L-Glutamate + Na+		0	0	0	0	0	0	0	0	0	0	0	0	0	0	0	0	0	0	0	0	0	0	0	0	0	0	0	0	0	0	0	0	0	0	0	0	0
rxn00879_c0	myo-Inositol:NAD+ 2-oxidoreductase c0	S_cpd00003[c] + S_cpd00121[c] <=> S_cpd00004[c] + S_cpd00067[c] + S_cpd00524[c]	(CAETHG_RS06285)	CAETHG_RS06285		Inositol catabolism	1	-1000	1000	1.1.1.18	NAD + L-Inositol <=> NADH + H+ + 2-Inosose		0	0	0	0	0	0	0	0	0	0	0	0	0	0	0	0	0	0	0	0	0	0	0	0	0	0	0	0	0	0	0	0	0	0	0	0	0
rxn05229_c0	NCAIR synthetase and NCAIR mutase c0	S_cpd00002[c] + S_cpd00242[c] + S_cpd02140[c] -> S_cpd00008[c] + S_cpd00009[c] + S_cpd00067[c] + S_cpd02893[c]	((CAETHG_RS14490) and ())	CAETHG_RS14490		De Novo Purine Biosynthesis	0	0	1000		ATP + H2CO3 + AIR -> ADP + Phosphate + H+ + 5-Phosphoribosyl-4-carboxy-5-aminoimidazole		0.00877774	0.00877774	0.00877774	0.00899183	0.00883126	9.27042e-05	0.00899183	0.00899183	0.00877774	0.00899183	0.0089383	9.27042e-05	0.00877774	0.00899183	0.00888478	0.000107046	0.00899183	0.00877774	0.00888478	0.000107046	0.00877774	0.00877774	0.00877774	0.00877774	8.64005e-14	0.00899183	0.00899183	0.00899183	0.00920592	0.00904535	9.27042e-05	0.00899183	0.00899183	0.00899183	1.42109e-14	0.00428182	0.00419619
rxn12637_c0	aminopeptidase c0	S_cpd00001[c] + S_cpd11589[c] <=> S_cpd00033[c] + S_cpd00041[c]	(((CAETHG_RS04585) or (CAETHG_RS15660)) or (CAETHG_RS03545) or (CAETHG_RS07155))	CAETHG_RS03545 CAETHG_RS04585 CAETHG_RS07155 CAETHG_RS15660		Recycling of Peptidoglycan Amino Acids|Protein degradation	1	-1000	1000		H2O + gly-asp-L <=> Glycine + L-Aspartate		0	0	0	0	0	0	0	0	0	0	0	0	0	0	0	0	0	0	0	0	0	0	0	0	0	0	0	0	0	0	0	0	0	0	0	0	0
rxn08297_c0	diacylglycerol kinase (n-C16:0) c0	S_cpd00002[c] + S_cpd15309[c] <=> S_cpd00008[c] + S_cpd15524[c]	(CAETHG_RS14270)	CAETHG_RS14270		Glycerolipid and Glycerophospholipid Metabolism in Bacteria	1	-1000	1000	2.7.1.107	ATP + 1,2-Diacyl-sn-glycerol dihexadecanoyl <=> ADP + 1,2-dihexadecanoyl-sn-glycerol 3-phosphate		0	0	0	0	0	0	0	0	0	0	0	0	0	0	0	0	0	0	0	0	0	0	0	0	0	0	0	0	0	0	0	0	0	0	0	0	0
rxn00902_c0	3-Carboxy-3-hydroxy-4-methylpentanoate 3-methyl-2-oxobutanoate-lyase c0	S_cpd00001[c] + S_cpd00022[c] + S_cpd00123[c] -> S_cpd00010[c] + S_cpd00067[c] + S_cpd01646[c]	(CAETHG_RS14745)	CAETHG_RS14745		Leucine biosynthesis	0	0	1000	2.3.3.13	H2O + Acetyl-CoA + 3-Methyl-2-oxobutanoate -> CoA + H+ + 2-Isopropylmalate		0.00856853	0.00856853	0.00856853	0.00877752	0.00862078	9.04947e-05	0.00877752	0.00877752	0.00856853	0.00877752	0.00872527	9.04947e-05	0.00856853	0.00877752	0.00867302	0.000104494	0.00877752	0.00856853	0.00867302	0.000104494	0.00856853	0.00856853	0.00856853	0.00856853	0	0.00877752	0.00877752	0.00877752	0.00898651	0.00882976	9.04947e-05	0.00877752	0.00877752	0.00877752	0	0.00417977	0.00409617
rxn03852_c0	UDP-N-acetyl-D-mannosamine:N-acetyl-beta-D- c0	S_cpd00861[c] + S_cpd00946[c] <=> S_cpd00014[c] + S_cpd02967[c]	(CAETHG_RS06245)	CAETHG_RS06245		Vibrio Polysaccharide (VPS) Biosynthesis|Teichoic and lipoteichoic acids biosynthesis	1	-1000	1000	2.4.1.187	UDP-N-acetyl-D-mannosamine + Undecaprenyl diphospho N-acetyl-glucosamine <=> UDP + N-Acetyl-beta-D-mannosaminyl-1,4-N-acetyl-D- glucosaminyldiphosphoundecaprenol		0	0	0	0	0	0	0	0	0	0	0	0	0	0	0	0	0	0	0	0	0	0	0	0	0	0	0	0	0	0	0	0	0	0	0	0	0
rxn00952_c0	O-Acetyl-L-homoserine acetate-lyase (adding methanethiol) c0	S_cpd00239[c] + S_cpd00790[c] -> S_cpd00029[c] + S_cpd00067[c] + S_cpd00135[c]	((CAETHG_RS13550) or (CAETHG_RS19855))	CAETHG_RS13550 CAETHG_RS19855		Methionine biosynthesis	0	0	1000	2.5.1.49	H2S + O-Acetyl-L-homoserine -> Acetate + H+ + Homocysteine		0.00166309	0.00166309	0.00166309	0.00170365	0.00167323	1.75644e-05	0.00170365	0.00170365	0.00166309	0.00170365	0.00169351	1.75644e-05	0.00166309	0.00170365	0.00168337	2.02816e-05	0.00170365	0.00166309	0.00168337	2.02816e-05	0.00166309	0.00166309	0.00166309	0.00166309	0	0.00170365	0.00170365	0.00170365	0.00174422	0.00171379	1.75644e-05	0.00170365	0.00170365	0.00170365	0	0.000811263	0.000795038
rxn03909_c0	1-Deoxy-D-xylulose-5-phosphate pyruvate-lyase (carboxylating) c0	S_cpd00020[c] + S_cpd00067[c] + S_cpd00102[c] -> S_cpd00011[c] + S_cpd08289[c]	(CAETHG_RS15740)	CAETHG_RS15740		Methylerythritol Phosphate Pathway	0	0	1000	2.2.1.7	Pyruvate + H+ + Glyceraldehyde3-phosphate -> CO2 + 1-deoxy-D-xylulose5-phosphate		9.13275e-06	9.13275e-06	9.13275e-06	9.3555e-06	9.18844e-06	9.64536e-08	9.3555e-06	9.3555e-06	9.13275e-06	9.3555e-06	9.29981e-06	9.64536e-08	9.13275e-06	9.3555e-06	9.24412e-06	1.11375e-07	9.3555e-06	9.13275e-06	9.24412e-06	1.11375e-07	9.13275e-06	9.13275e-06	9.13275e-06	9.13275e-06	0	9.3555e-06	9.3555e-06	9.3555e-06	9.57825e-06	9.41119e-06	9.64536e-08	9.3555e-06	9.3555e-06	9.3555e-06	0	4.455e-06	4.3659e-06
rxn05187_c0	Vitamin ABC transport c0	S_cpd00001[c] + S_cpd00002[c] + S_cpd03424[e] -> S_cpd00008[c] + S_cpd00009[c] + S_cpd00067[c] + S_cpd03424[c]	((CAETHG_RS13145) and (CAETHG_RS13140) and (CAETHG_RS13135))	CAETHG_RS13135 CAETHG_RS13140 CAETHG_RS13145		Coenzyme B12 biosynthesis	0	0	1000		H2O + ATP + Vitamin B12 -> ADP + Phosphate + H+ + Vitamin B12		0	0	0	0	0	0	0	0	0	0	0	0	0	0	0	0	0	0	0	0	0	0	0	0	0	0	0	0	0	0	0	0	0	0	0	0	0
rxn10230_c0	anteisopentadecanoyl-CDPdiacylglycerol-serine O-phosphatidyltransferase c0	S_cpd00054[c] + S_cpd15687[c] -> S_cpd00046[c] + S_cpd00067[c] + S_cpd15693[c]	(CAETHG_RS11850)	CAETHG_RS11850		Glycerolipid and Glycerophospholipid Metabolism in Bacteria	0	0	1000	2.7.8.8	L-Serine + CDP-1,2-dianteisopentadecanoylglycerol -> CMP + H+ + Dianteisopentadecanoylphosphatidylserine		0	0	0	0	0	0	0	0	0	0	0	0	0	0	0	0	0	0	0	0	0	0	0	0	0	0	0	0	0	0	0	0	0	0	0	0	0
rxn05372_c0	10-methyl-3-oxo-dodecanoyl-ACP:NADP+ oxidoreductase c0	S_cpd00005[c] + S_cpd00067[c] + S_cpd11508[c] <=> S_cpd00006[c] + S_cpd11509[c]	((CAETHG_RS08435) or (CAETHG_RS00375) or (CAETHG_RS00860) or (CAETHG_RS04365) or (CAETHG_RS06705) or (CAETHG_RS03500) or (CAETHG_RS04680) or (CAETHG_RS09990))	CAETHG_RS00375 CAETHG_RS00860 CAETHG_RS03500 CAETHG_RS04365 CAETHG_RS04680 CAETHG_RS06705 CAETHG_RS08435 CAETHG_RS09990		mycolic acid synthesis|Fatty Acid Biosynthesis FASII	1	-1000	1000	1.1.1.0	NADPH + H+ + 10-methyl-3-oxo-dodecanoyl-ACP <=> NADP + 10-methyl-3-hydroxy-dodecanoyl-ACP		0	0	0	0	0	0	0	0	0	0	0	0	0	0	0	0	0	0	0	0	0	0	0	0	0	0	0	0	0	0	0	0	0	0	0	0	0
rxn00459_c0	2-Phospho-D-glycerate hydro-lyase c0	S_cpd00482[c] <=> S_cpd00001[c] + S_cpd00061[c]	(CAETHG_RS08495)	CAETHG_RS08495		Glycolysis/Gluconeogenesis	1	-1000	1000	4.2.1.11	2-Phospho-D-glycerate <=> H2O + Phosphoenolpyruvate		-0.115792	-0.115792	-0.115792	-0.118616	-0.116498	0.00122291	-0.118616	-0.118616	-0.115792	-0.118616	-0.11791	0.00122291	-0.115792	-0.118616	-0.117204	0.00141209	-0.118616	-0.115792	-0.117204	0.00141209	-0.115792	-0.115792	-0.115792	-0.115792	1.60777e-13	-0.118616	-0.118616	-0.118616	-0.12144	-0.119322	0.00122291	-0.118616	-0.118616	-0.118616	5.68434e-14	-0.0564838	-0.0553541
rxn00405_c0	L-Arginine carboxy-lyase c0	S_cpd00051[c] + S_cpd00067[c] -> S_cpd00011[c] + S_cpd00152[c]	(CAETHG_RS06350)	CAETHG_RS06350		Arginine-dependent Acid Resistance	0	0	1000	4.1.1.19	L-Arginine + H+ -> CO2 + Agmatine		0	0	0	0	0	0	0	0	0	0	0	0	0	0	0	0	0	0	0	0	0	0	0	0	0	0	0	0	0	0	0	0	0	0	0	0	0
rxn10277_c0	isopentadecanoyl-UDP-glucosyltransferase (diglucosyl) c0	S_cpd00026[c] + S_cpd15743[c] <=> S_cpd00014[c] + S_cpd15734[c]	(CAETHG_RS11420)	CAETHG_RS11420		Teichoic and lipoteichoic acids biosynthesis	1	-1000	1000		UDP-glucose + Monoglucosyl-1,2 diisopentadecanoylglycerol <=> UDP + Diglucosyl-1,2 diisopentadecanoylglycerol		0	0	0	0	0	0	0	0	0	0	0	0	0	0	0	0	0	0	0	0	0	0	0	0	0	0	0	0	0	0	0	0	0	0	0	0	0
rxn10225_c0	isohexadecanoyl-phosphatidate cytidylyltransferase c0	S_cpd00052[c] + S_cpd15682[c] <=> S_cpd00012[c] + S_cpd15688[c]	(CAETHG_RS16645)	CAETHG_RS16645		Glycerolipid and Glycerophospholipid Metabolism in Bacteria	1	-1000	1000	2.7.7.41	CTP + 1,2-diisohexadecanoyl-sn-glycerol 3-phosphate <=> PPi + CDP-1,2-diisohexadecanoylglycerol		0	0	0	0	0	0	0	0	0	0	0	0	0	0	0	0	0	0	0	0	0	0	0	0	0	0	0	0	0	0	0	0	0	0	0	0	0
rxn10259_c0	isoheptadecanoyl-CDPdiacylglycerol:sn-glycerol-3-phosphate 3-phosphatidyltransferase c0	S_cpd00080[c] + S_cpd15683[c] <=> S_cpd00046[c] + S_cpd15716[c]	((CAETHG_RS16745) or (CAETHG_RS06675))	CAETHG_RS06675 CAETHG_RS16745		Glycerolipid and Glycerophospholipid Metabolism in Bacteria	1	-1000	1000	2.7.8.5	Glycerol-3-phosphate + CDP-1,2-diisoheptadecanoylglycerol <=> CMP + Diisoheptadecanoylphosphatidylglycerophosphate		0	0	0	0	0	0	0	0	0	0	0	0	0	0	0	0	0	0	0	0	0	0	0	0	0	0	0	0	0	0	0	0	0	0	0	0	0
rxn00929_c0	L-Proline:NAD+ 5-oxidoreductase c0	S_cpd00003[c] + S_cpd00129[c] <=> S_cpd00004[c] + S_cpd00067[c] + S_cpd02431[c]	(CAETHG_RS07730)	CAETHG_RS07730		Proline biosynthesis	1	-1000	1000	1.5.1.2	NAD + L-Proline <=> NADH + H+ + 1-Pyrroline-5-carboxylate		-0.00311605	-0.00311605	-0.00311605	-0.00319205	-0.00313505	3.29095e-05	-0.00319205	-0.00319205	-0.00311605	-0.00319205	-0.00317305	3.29095e-05	-0.00311605	-0.00319205	-0.00315405	3.80006e-05	-0.00319205	-0.00311605	-0.00315405	3.80006e-05	-0.00311605	-0.00311605	-0.00311605	-0.00311605	0	-0.00319205	-0.00319205	-0.00319205	-0.00326805	-0.00321105	3.29095e-05	-0.00319205	-0.00319205	-0.00319205	0	-0.00152002	-0.00148962
rxn05316_c0	INSt2r c0	S_cpd00067[e] + S_cpd00246[e] <=> S_cpd00067[c] + S_cpd00246[c]	(CAETHG_RS19245)	CAETHG_RS19245		Transport Reactions	1	-1000	1000		H+ + Inosine <=> H+ + Inosine		0	0	0	0	0	0	0	0	0	0	0	0	0	0	0	0	0	0	0	0	0	0	0	0	0	0	0	0	0	0	0	0	0	0	0	0	0
cpd00067_ext_b		S_cpd00067[e] <=>				Exchange Reactions	1	-1000	1000		H+ <=>		5.96393	6.03646	4.96409	6.23173	5.79905	0.491916	8.03601	7.97871	8.06352	7.55148	7.90743	0.207771	13.9383	13.0462	13.4923	0.446022	13.0341	11.6732	12.3536	0.680478	10.3802	10.413	10.8208	10.538	0.200402	11.414	10.6927	12.2827	11.6527	11.5105	0.568923	29.5885	34.7884	32.1884	2.59995	13.8277	13.6994
rxn08311_c0	CDP-diacylglycerol synthetase (n-C18:0) c0	S_cpd00052[c] + S_cpd15526[c] <=> S_cpd00012[c] + S_cpd15421[c]	(CAETHG_RS16645)	CAETHG_RS16645		Glycerolipid and Glycerophospholipid Metabolism in Bacteria	1	-1000	1000	2.7.7.41	CTP + 1,2-dioctadecanoyl-sn-glycerol 3-phosphate <=> PPi + CDP-1,2-dioctadecanoylglycerol		0	0	0	0	0	0	0	0	0	0	0	0	0	0	0	0	0	0	0	0	0	0	0	0	0	0	0	0	0	0	0	0	0	0	0	0	0
rxn10288_c0	isohexadecanoyl-UDP-glucosyltransferase (monoglucosyl) c0	S_cpd00026[c] + S_cpd15706[c] <=> S_cpd00014[c] + S_cpd15745[c]	(CAETHG_RS11420)	CAETHG_RS11420		Teichoic and lipoteichoic acids biosynthesis	1	-1000	1000		UDP-glucose + 1,2-Diisohexadecanoyl-sn-glycerol <=> UDP + Monoglucosyl-1,2 diisohexadecanoylglycerol		0	0	0	0	0	0	0	0	0	0	0	0	0	0	0	0	0	0	0	0	0	0	0	0	0	0	0	0	0	0	0	0	0	0	0	0	0
rxn01492_c0	ATP:D-fructose-1-phosphate 6-phosphotransferase c0	S_cpd00002[c] + S_cpd00802[c] <=> S_cpd00008[c] + S_cpd00290[c]	(() and (CAETHG_RS00685))	CAETHG_RS00685		Glycolysis/Gluconeogenesis	1	-1000	1000	2.7.1.11	ATP + D-fructose-1-phosphate <=> ADP + D-fructose-1,6-bisphosphate		-0.0362139	-0.0362139	-0.0362139	-0.0370972	-0.0364347	0.000382465	-0.0370972	-0.0370972	-0.0362139	-0.0370972	-0.0368764	0.000382465	-0.0362139	-0.0370972	-0.0366555	0.000441633	-0.0370972	-0.0362139	-0.0366555	0.000441633	-0.0362139	-0.0362139	-0.0362139	-0.0362139	1.07185e-13	-0.0370972	-0.0370972	-0.0370972	-0.0379804	-0.037318	0.000382465	-0.0370972	-0.0370972	-0.0370972	0	-0.0176653	-0.017312
rxn01101_c0	3-Phospho-D-glycerate:NAD+ 2-oxidoreductase c0	S_cpd00003[c] + S_cpd00169[c] <=> S_cpd00004[c] + S_cpd00067[c] + S_cpd02069[c]	((CAETHG_RS15950) or (CAETHG_RS10850) or (CAETHG_RS05635) or (CAETHG_RS04820) or (CAETHG_RS09955) or (CAETHG_RS05085) or (CAETHG_RS06620) or (CAETHG_RS00020) or (CAETHG_RS05960) or (CAETHG_RS12055) or (CAETHG_RS15970))	CAETHG_RS00020 CAETHG_RS04820 CAETHG_RS05085 CAETHG_RS05635 CAETHG_RS05960 CAETHG_RS06620 CAETHG_RS09955 CAETHG_RS10850 CAETHG_RS12055 CAETHG_RS15950 CAETHG_RS15970		Serine biosynthesis	1	-1000	1000	1.1.1.95	NAD + 3-Phosphoglycerate <=> NADH + H+ + 3-Phosphonooxypyruvate		0	0	0	0	0	0	0	0	0	0	0	0	0	0	0	0	0	0	0	0	0	0	0	0	0	0	0	0	0	0	0	0	0	0	0	0	0
rxn10193_c0	Poly(glycerol-phosphate) alpha-glucosyltransferase c0	45 S_cpd00026[c] + S_cpd15661[c] <=> 45 S_cpd00014[c] + S_cpd15662[c]	(CAETHG_RS06265)	CAETHG_RS06265		Teichoic and lipoteichoic acids biosynthesis	1	-1000	1000	2.4.1.52	45 UDP-glucose + Prenol-45n teichoic acid <=> 45 UDP + Prenol-45n teichoic acid-glucose substituted		0	0	0	0	0	0	0	0	0	0	0	0	0	0	0	0	0	0	0	0	0	0	0	0	0	0	0	0	0	0	0	0	0	0	0	0	0
rxn00358_c0	UDP-D-galactopyranose furanomutase c0	S_cpd00043[c] <=> S_cpd02338[c]	(CAETHG_RS06005)	CAETHG_RS06005		LOS core oligosaccharide biosynthesis|linker unit-arabinogalactan synthesis	1	-1000	1000	5.4.99.9	UDP-galactose <=> UDP-D-galacto-1,4-furanose		0	0	0	0	0	0	0	0	0	0	0	0	0	0	0	0	0	0	0	0	0	0	0	0	0	0	0	0	0	0	0	0	0	0	0	0	0
rxn00302_c0	GTP 7,8-8,9-dihydrolase c0	S_cpd00001[c] + S_cpd00038[c] -> S_cpd03518[c]	(CAETHG_RS13405)	CAETHG_RS13405		Pterin metabolism|Methanopterin biosynthesis2|tRNA modification Archaea Henri|Folate Biosynthesis|Queuosine-Archaeosine Biosynthesis|Folate Biosynthesis (Phoenix Copy)|Zinc regulated enzymes|Pterin metabolism 3	0	0	1000	3.5.4.16	H2O + GTP -> Formamidopyrimidine nucleoside triphosphate		0	0	0	0	0	0	0	0	0	0	0	0	0	0	0	0	0	0	0	0	0	0	0	0	0	0	0	0	0	0	0	0	0	0	0	0	0
rxn05621_c0	methanesulfonate transport via ABC system c0	S_cpd00001[c] + S_cpd00002[c] + S_cpd08023[e] -> S_cpd00008[c] + S_cpd00009[c] + S_cpd00067[c] + S_cpd08023[c]	(() and ((CAETHG_RS03470) or (CAETHG_RS19320)) and ((CAETHG_RS03465) or (CAETHG_RS19325)))	CAETHG_RS03465 CAETHG_RS03470 CAETHG_RS19320 CAETHG_RS19325		Alkanesulfonate assimilation|Alkanesulfonates utilisation	0	0	1000		H2O + ATP + methanesulfonate -> ADP + Phosphate + H+ + methanesulfonate		0	0	0	0	0	0	0	0	0	0	0	0	0	0	0	0	0	0	0	0	0	0	0	0	0	0	0	0	0	0	0	0	0	0	0	0	0
rxn05145_c0	Orthophosphate-ABC transport c0	S_cpd00001[c] + S_cpd00002[c] + S_cpd00009[e] -> S_cpd00008[c] + 2 S_cpd00009[c] + S_cpd00067[c]	((CAETHG_RS16325) and (CAETHG_RS16315) and (CAETHG_RS16320) and (CAETHG_RS16310))	CAETHG_RS16310 CAETHG_RS16315 CAETHG_RS16320 CAETHG_RS16325		High affinity phosphate transporter and control of PHO regulon|P uptake (cyanobacteria)|Phosphate metabolism	0	0	1000		H2O + ATP + Phosphate -> ADP + 2 Phosphate + H+		0	0	0	0	0	0	0	0	0	0	0	0	0	0	0	0	0	0	0	0	0	0	0	0	0	0	0	0	0	0	0	0	0	0	0	0	0
cpd00009_ext_b		S_cpd00009[e] <=>				Exchange Reactions	1	-1000	0		Phosphate <=>		-0.0706137	-0.0706137	-0.0706137	-0.072336	-0.0710443	0.000745771	-0.072336	-0.072336	-0.0706137	-0.072336	-0.0719054	0.000745771	-0.0706137	-0.072336	-0.0714748	0.000861143	-0.072336	-0.0706137	-0.0714748	0.000861143	-0.0706137	-0.0706137	-0.0706137	-0.0706137	1.60777e-13	-0.072336	-0.072336	-0.072336	-0.0740583	-0.0727666	0.000745771	-0.072336	-0.072336	-0.072336	0	-0.0344457	-0.0337568
rxn05341_c0	(3R)-3-Hydroxyoctanoyl-[acyl-carrier-protein]:NADP+ oxidoreductase c0	S_cpd00006[c] + S_cpd11483[c] <=> S_cpd00005[c] + S_cpd00067[c] + S_cpd11490[c]	((CAETHG_RS08435) or (CAETHG_RS00375) or (CAETHG_RS00860) or (CAETHG_RS04365) or (CAETHG_RS06705) or (CAETHG_RS03500) or (CAETHG_RS04680) or (CAETHG_RS09990))	CAETHG_RS00375 CAETHG_RS00860 CAETHG_RS03500 CAETHG_RS04365 CAETHG_RS04680 CAETHG_RS06705 CAETHG_RS08435 CAETHG_RS09990		mycolic acid synthesis|Fatty Acid Biosynthesis FASII	1	-1000	1000		NADP + (R)-3-Hydroxyoctanoyl-[acyl-carrier protein] <=> NADPH + H+ + 3-oxooctanoyl-acp		0	0	0	0	0	0	0	0	0	0	0	0	0	0	0	0	0	0	0	0	0	0	0	0	0	0	0	0	0	0	0	0	0	0	0	0	0
rxn02988_c0	quinolinate synthase c0	S_cpd00095[c] + S_cpd03470[c] -> 2 S_cpd00001[c] + S_cpd00009[c] + S_cpd00067[c] + S_cpd02333[c]	(CAETHG_RS02395)	CAETHG_RS02395		Quinolinic acid and its derivatives|YgfZ|Cobalt-zinc-cadmium resistance|NAD and NADP cofactor biosynthesis global|NAD regulation	0	0	1000		Glycerone-phosphate + Iminoaspartate -> 2 H2O + Phosphate + H+ + Quinolinate		3.6328e-05	3.63281e-05	3.6328e-05	3.72141e-05	3.65496e-05	3.83671e-07	3.72141e-05	3.72141e-05	3.63281e-05	3.72141e-05	3.69926e-05	3.83671e-07	3.6328e-05	3.72141e-05	3.67711e-05	4.43025e-07	3.72141e-05	3.6328e-05	3.67711e-05	4.43025e-07	3.6328e-05	3.63281e-05	3.63281e-05	3.6328e-05	8.0109e-15	3.72141e-05	3.72141e-05	3.72141e-05	3.81001e-05	3.74356e-05	3.83671e-07	3.72141e-05	3.72141e-05	3.72141e-05	1.42116e-14	1.7721e-05	1.73666e-05
rxn05460_c0	3-Oxooctodecanoyl-ACP:malonyl-[acyl-carrier-protein] C-acyltransferase (decarboxylating) c0	S_cpd00067[c] + S_cpd11476[c] + S_cpd11492[c] -> S_cpd00011[c] + S_cpd11493[c] + S_cpd11570[c]	((CAETHG_RS10005) and (CAETHG_RS09985))	CAETHG_RS09985 CAETHG_RS10005		Fatty Acid Biosynthesis FASII	0	0	1000	2.3.1.0	H+ + hexadecanoyl-acp + Malonyl-acyl-carrierprotein -> CO2 + ACP + 3-Oxooctodecanoyl-ACP		0	0	0	0	0	0	0	0	0	0	0	0	0	0	0	0	0	0	0	0	0	0	0	0	0	0	0	0	0	0	0	0	0	0	0	0	0
rxn10281_c0	myristoyl-UDP-glucosyltransferase (monoglucosyl) c0	S_cpd00026[c] + S_cpd15307[c] <=> S_cpd00014[c] + S_cpd15738[c]	(CAETHG_RS11420)	CAETHG_RS11420		Teichoic and lipoteichoic acids biosynthesis	1	-1000	1000		UDP-glucose + 1,2-Diacyl-sn-glycerol ditetradecanoyl <=> UDP + Monoglucosyl-1,2 dimyristoylglycerol		0	0	0	0	0	0	0	0	0	0	0	0	0	0	0	0	0	0	0	0	0	0	0	0	0	0	0	0	0	0	0	0	0	0	0	0	0
rxn10199_c0	Peptidoglycan subunit synthesis c0	S_cpd03495[c] + S_cpd15666[c] <=> S_cpd02229[c] + S_cpd15665[c]	((CAETHG_RS18130) or (CAETHG_RS06210) or (CAETHG_RS18135))	CAETHG_RS06210 CAETHG_RS18130 CAETHG_RS18135		Peptidoglycan Biosynthesis|Type IV pilus|Peptidoglycan Biosynthesis 2	1	-1000	1000		Undecaprenyl-diphospho-N-acetylmuramoyl-N-acetylglucosamine-L-ala-D-glu-meso-2-6-diaminopimeloyl-D-ala-D-ala + Peptidoglycan polymer (n-1 subunits) <=> Bactoprenyl diphosphate + Peptidoglycan polymer (n subunits)		0	0	0	0	0	0	0	0	0	0	0	0	0	0	0	0	0	0	0	0	0	0	0	0	0	0	0	0	0	0	0	0	0	0	0	0	0
rxn09200_c0	Phosphatidylserine decarboxylase (n-C16:0) c0	2 S_cpd00067[c] + S_cpd15555[c] <=> S_cpd00011[c] + S_cpd15531[c]	(CAETHG_RS10720)	CAETHG_RS10720		Glycerolipid and Glycerophospholipid Metabolism in Bacteria|Bacterial cyanide production and tolerance mechanisms	1	-1000	1000	4.1.1.65	2 H+ + phosphatidylserine dihexadecanoyl <=> CO2 + phosphatidylethanolamine dihexadecanoyl		0	0	0	0	0	0	0	0	0	0	0	0	0	0	0	0	0	0	0	0	0	0	0	0	0	0	0	0	0	0	0	0	0	0	0	0	0
rxn02937_c0	2-(Formamido)-N1-(5-phosphoribosyl)acetamidine cyclo-ligase c0	S_cpd00002[c] + S_cpd02826[c] <=> S_cpd00008[c] + S_cpd00009[c] + S_cpd00067[c] + S_cpd02140[c]	(CAETHG_RS14505)	CAETHG_RS14505		YgfZ|De Novo Purine Biosynthesis	1	-1000	1000	6.3.3.1	ATP + 5-Phosphoribosylformylglycinamidine <=> ADP + Phosphate + H+ + AIR		0.00878687	0.00878687	0.00878687	0.00900118	0.00884045	9.28006e-05	0.00900118	0.00900118	0.00878687	0.00900118	0.0089476	9.28006e-05	0.00878687	0.00900118	0.00889402	0.000107157	0.00900118	0.00878687	0.00889402	0.000107157	0.00878687	0.00878687	0.00878687	0.00878687	5.35925e-14	0.00900118	0.00900118	0.00900118	0.0092155	0.00905476	9.28006e-05	0.00900118	0.00900118	0.00900118	0	0.00428628	0.00420055
rxn00640_c0	GDP:D-mannose-1-phosphate guanylyltransferase c0	S_cpd00031[c] + S_cpd00485[c] <=> S_cpd00009[c] + S_cpd00067[c] + S_cpd00083[c]	((CAETHG_RS12860) or (CAETHG_RS11305))	CAETHG_RS11305 CAETHG_RS12860		Mannose Metabolism	1	-1000	1000	2.7.7.22	GDP + D-Mannose1-phosphate <=> Phosphate + H+ + GDP-mannose		0	0	0	0	0	0	0	0	0	0	0	0	0	0	0	0	0	0	0	0	0	0	0	0	0	0	0	0	0	0	0	0	0	0	0	0	0
rxn00649_c0	O3-Acetyl-L-serine acetate-lyase (adding hydrogen sulfide) c0	S_cpd00239[c] + S_cpd00722[c] -> S_cpd00029[c] + S_cpd00067[c] + S_cpd00084[c]	((CAETHG_RS14360) or (CAETHG_RS08595))	CAETHG_RS08595 CAETHG_RS14360		Cysteine Biosynthesis	0	0	1000	2.5.1.47,2.5.1.65,4.2.99.8	H2S + O-Acetyl-L-serine -> Acetate + H+ + L-Cysteine		0	0	0	0	0	0	0	0	0	0	0	0	0	0	0	0	0	0	0	0	0	0	0	0	0	0	0	0	0	0	0	0	0	0	0	0	0
rxn01763_c0	ATP:L-ribulose 5-phosphotransferase c0	S_cpd00002[c] + S_cpd00397[c] <=> S_cpd00008[c] + S_cpd00808[c]	(CAETHG_RS10975)	CAETHG_RS10975		Pentose Phosphate Pathway	1	-1000	1000	2.7.1.16	ATP + L-Ribulose <=> ADP + L-ribulose-5-phosphate		0	0	0	0	0	0	0	0	0	0	0	0	0	0	0	0	0	0	0	0	0	0	0	0	0	0	0	0	0	0	0	0	0	0	0	0	0
rxn12851_c0	Gly-Try ABC transporters c0	S_cpd00001[c] + S_cpd00002[c] + S_cpd15606[e] -> S_cpd00008[c] + S_cpd00009[c] + S_cpd15606[c]	(CAETHG_RS07520)	CAETHG_RS07520		ABC transporter dipeptide (TC 3.A.1.5.2)	0	0	1000		H2O + ATP + Gly-Tyr -> ADP + Phosphate + Gly-Tyr		0	0	0	0	0	0	0	0	0	0	0	0	0	0	0	0	0	0	0	0	0	0	0	0	0	0	0	0	0	0	0	0	0	0	0	0	0
rxn01446_c0	Deoxyguanosine:orthophosphate ribosyltransferase c0	S_cpd00009[c] + S_cpd00067[c] + S_cpd00277[c] <=> S_cpd00207[c] + S_cpd00509[c]	(CAETHG_RS00760)	CAETHG_RS00760		Xanthosine utilisation (xap region)	1	-1000	1000	2.4.2.1,2.4.2.4	Phosphate + H+ + Deoxyguanosine <=> Guanine + deoxyribose-1-phosphate		0	0	0	0	0	0	0	0	0	0	0	0	0	0	0	0	0	0	0	0	0	0	0	0	0	0	0	0	0	0	0	0	0	0	0	0	0
rxn05346_c0	butyryl-[acyl-carrier protein]:malonyl-[acyl-carrier-protein] c0	S_cpd00067[c] + S_cpd11464[c] + S_cpd11492[c] -> S_cpd00011[c] + S_cpd11486[c] + S_cpd11493[c]	((CAETHG_RS10005) and (CAETHG_RS09985))	CAETHG_RS09985 CAETHG_RS10005		Fatty Acid Biosynthesis FASII	0	0	1000	2.3.1.41,2.3.1.85,2.3.1.86,2.3.1.179,2.3.1.180	H+ + Butyryl-ACP + Malonyl-acyl-carrierprotein -> CO2 + 3-Oxohexanoyl-[acp] + ACP		0	0	0	0	0	0	0	0	0	0	0	0	0	0	0	0	0	0	0	0	0	0	0	0	0	0	0	0	0	0	0	0	0	0	0	0	0
rxn01654_c0	5-Formiminotetrahydrofolate ammonia-lyase (cyclizing) c0	S_cpd00013[c] + S_cpd00347[c] -> 2 S_cpd00067[c] + S_cpd00502[c]	((CAETHG_RS08360) or (CAETHG_RS01095) or (CAETHG_RS07845))	CAETHG_RS01095 CAETHG_RS07845 CAETHG_RS08360		Histidine Degradation|5-FCL-like protein|One-carbon metabolism by tetrahydropterines|Serine-glyoxylate cycle	0	0	1000	4.3.1.4	NH3 + 5-10-Methenyltetrahydrofolate -> 2 H+ + 5-Formiminotetrahydrofolate		0	0	0	0	0	0	0	0	0	0	0	0	0	0	0	0	0	0	0	0	0	0	0	0	0	0	0	0	0	0	0	0	0	0	0	0	0
rxn00558_c0	D-Glucose-6-phosphate ketol-isomerase c0	S_cpd00079[c] <=> S_cpd00072[c]	(CAETHG_RS07610)	CAETHG_RS07610		Pentose Phosphate Pathway	1	-1000	1000	5.3.1.9	D-glucose-6-phosphate <=> D-fructose-6-phosphate		-0.0109301	-0.0109301	-0.0109301	-0.0111967	-0.0109967	0.000115436	-0.0111967	-0.0111967	-0.0109301	-0.0111967	-0.01113	0.000115436	-0.0109301	-0.0111967	-0.0110634	0.000133294	-0.0111967	-0.0109301	-0.0110634	0.000133294	-0.0109301	-0.0109301	-0.0109301	-0.0109301	0	-0.0111967	-0.0111967	-0.0111967	-0.0114632	-0.0112633	0.000115436	-0.0111967	-0.0111967	-0.0111967	0	-0.00533174	-0.00522511
rxn01406_c0	S-Adenosylmethioninamine:putrescine 3-aminopropyltransferase c0	S_cpd00118[c] + S_cpd00837[c] -> S_cpd00067[c] + S_cpd00147[c] + S_cpd00264[c]	(CAETHG_RS03880)	CAETHG_RS03880		Polyamine Metabolism	0	0	1000	2.5.1.16	Putrescine + S-Adenosylmethioninamine -> H+ + 5-Methylthioadenosine + Spermidine		0	0	0	0	0	0	0	0	0	0	0	0	0	0	0	0	0	0	0	0	0	0	0	0	0	0	0	0	0	0	0	0	0	0	0	0	0
rxn10340_c0	isopentadecanoyl-cardiolipin synthase c0	2 S_cpd15725[c] <=> S_cpd00100[c] + S_cpd15797[c]	((CAETHG_RS14670) or (CAETHG_RS04280))	CAETHG_RS04280 CAETHG_RS14670		Glycerolipid and Glycerophospholipid Metabolism in Bacteria	1	-1000	1000		2 Diisopentadecanoylphosphatidylglycerol <=> Glycerol + Isopentadecanoylcardiolipin (B. subtilis)		0	0	0	0	0	0	0	0	0	0	0	0	0	0	0	0	0	0	0	0	0	0	0	0	0	0	0	0	0	0	0	0	0	0	0	0	0
rxn00375_c0	N-Formyl-L-glutamate amidohydrolase c0	S_cpd00001[c] + S_cpd00770[c] <=> S_cpd00023[c] + S_cpd00047[c]	(CAETHG_RS02405)	CAETHG_RS02405		Histidine Degradation	1	-1000	1000	3.5.1.68	H2O + N-Formyl-L-glutamate <=> L-Glutamate + Formate		0	0	0	0	0	0	0	0	0	0	0	0	0	0	0	0	0	0	0	0	0	0	0	0	0	0	0	0	0	0	0	0	0	0	0	0	0
rxn00143_c0	S-Adenosyl-L-homocysteine homocysteinylribohydrolase c0	S_cpd00001[c] + S_cpd00019[c] <=> S_cpd00128[c] + S_cpd02227[c]	(((CAETHG_RS15525) or (CAETHG_RS19065) or (CAETHG_RS03510)) and ((CAETHG_RS15525) or (CAETHG_RS19065) or (CAETHG_RS03510)))	CAETHG_RS03510 CAETHG_RS15525 CAETHG_RS19065		Polyamine Metabolism|Adenosyl nucleosidases|Methionine Salvage|Menaqui Biosynthesis via Futalosine	1	-1000	1000	3.2.2.9	H2O + S-Adenosyl-homocysteine <=> Adenine + S-Ribosylhomocysteine		0	0	0	0	0	0	0	0	0	0	0	0	0	0	0	0	0	0	0	0	0	0	0	0	0	0	0	0	0	0	0	0	0	0	0	0	0
rxn00187_c0	L-Glutamate:ammonia ligase (ADP-forming) c0	S_cpd00002[c] + S_cpd00013[c] + S_cpd00023[c] -> S_cpd00008[c] + S_cpd00009[c] + S_cpd00053[c] + S_cpd00067[c]	(CAETHG_RS09895)	CAETHG_RS09895		Glutamate and Glutamine metabolism	0	0	1000	6.3.1.2	ATP + NH3 + L-Glutamate -> ADP + Phosphate + L-Glutamine + H+		0.0591806	0.0591806	0.0591806	0.060624	0.0595414	0.000625023	0.060624	0.060624	0.0591806	0.060624	0.0602632	0.000625023	0.0591806	0.060624	0.0599023	0.000721715	0.060624	0.0591806	0.0599023	0.000721715	0.0591806	0.0591806	0.0591806	0.0591806	1.72735e-13	0.060624	0.060624	0.060624	0.0620674	0.0609849	0.000625023	0.060624	0.060624	0.060624	2.84217e-14	0.0288686	0.0282912
rxn02875_c0	N-Acetylmuramoyl-Ala amidohydrolase c0	S_cpd00001[c] + S_cpd01923[c] <=> S_cpd00035[c] + S_cpd03485[c]	((CAETHG_RS18455) or (CAETHG_RS08540) or (CAETHG_RS08010) or (CAETHG_RS04355) or (CAETHG_RS19190))	CAETHG_RS04355 CAETHG_RS08010 CAETHG_RS08540 CAETHG_RS18455 CAETHG_RS19190		Peptidoglycan Biosynthesis	1	-1000	1000	3.5.1.28	H2O + N-Acetylmuramoyl-Ala <=> L-Alanine + N-Acetyl-D-muramoate		0	0	0	0	0	0	0	0	0	0	0	0	0	0	0	0	0	0	0	0	0	0	0	0	0	0	0	0	0	0	0	0	0	0	0	0	0
rxn00737_c0	L-threonine ammonia-lyase c0	S_cpd00161[c] -> S_cpd00013[c] + S_cpd00094[c]	(CAETHG_RS17735)	CAETHG_RS17735		Isoleucine Biosynthesis	0	0	1000	4.3.1.19	L-Threonine -> NH3 + 2-Oxobutyrate		0.00708964	0.00708964	0.00708964	0.00726256	0.00713287	7.48757e-05	0.00726256	0.00726256	0.00708964	0.00726256	0.00721933	7.48757e-05	0.00708964	0.00726256	0.0071761	8.6459e-05	0.00726256	0.00708964	0.0071761	8.6459e-05	0.00708964	0.00708964	0.00708964	0.00708964	0	0.00726256	0.00726256	0.00726256	0.00743548	0.00730579	7.48757e-05	0.00726256	0.00726256	0.00726256	0	0.00345836	0.00338919
rxn01200_c0	Sedoheptulose-7-phosphate:D-glyceraldehyde-3-phosphate c0	S_cpd00102[c] + S_cpd00238[c] <=> S_cpd00101[c] + S_cpd00198[c]	(((CAETHG_RS11925) or (CAETHG_RS03090)) or ((CAETHG_RS03095) or (CAETHG_RS11920)))	CAETHG_RS03090 CAETHG_RS03095 CAETHG_RS11920 CAETHG_RS11925		Pentose Phosphate Pathway	1	-1000	1000	2.2.1.1	Glyceraldehyde3-phosphate + Sedoheptulose7-phosphate <=> ribose-5-phosphate + D-Xylulose5-phosphate		0.00490402	0.00490402	0.00490402	0.00502363	0.00493392	5.17927e-05	0.00502363	0.00502363	0.00490402	0.00502363	0.00499372	5.17927e-05	0.00490402	0.00502363	0.00496382	5.98051e-05	0.00502363	0.00490402	0.00496382	5.98051e-05	0.00490402	0.00490402	0.00490402	0.00490402	5.35925e-14	0.00502363	0.00502363	0.00502363	0.00514324	0.00505353	5.17927e-05	0.00502363	0.00502363	0.00502363	0	0.0023922	0.00234436
rxn05232_c0	Ribonucleotide reductase: ATP c0	S_cpd00002[c] + S_cpd11421[c] -> S_cpd00001[c] + S_cpd00115[c] + S_cpd11420[c]	(CAETHG_RS11260)	CAETHG_RS11260		Ribonucleotide reduction	0	0	1000	1.17.4.2	ATP + trdrd -> H2O + dATP + trdox		0.0011726	0.0011726	0.0011726	0.0012012	0.00117975	1.23842e-05	0.0012012	0.0012012	0.0011726	0.0012012	0.00119405	1.23842e-05	0.0011726	0.0012012	0.0011869	1.43e-05	0.0012012	0.0011726	0.0011869	1.43e-05	0.0011726	0.0011726	0.0011726	0.0011726	0	0.0012012	0.0012012	0.0012012	0.0012298	0.00120835	1.23842e-05	0.0012012	0.0012012	0.0012012	0	0.000572	0.00056056
rxn03841_c0	4-amino-4-deoxychorismate pyruvate-lyase c0	S_cpd08210[c] -> S_cpd00020[c] + S_cpd00067[c] + S_cpd00443[c]	(CAETHG_RS07245)	CAETHG_RS07245		4-aminobenzoate synthesis	0	0	1000	4.1.3.38	ADC -> Pyruvate + H+ + ABEE		3.6531e-05	3.6531e-05	3.6531e-05	3.7422e-05	3.67538e-05	3.85814e-07	3.7422e-05	3.7422e-05	3.6531e-05	3.7422e-05	3.71993e-05	3.85814e-07	3.6531e-05	3.7422e-05	3.69765e-05	4.455e-07	3.7422e-05	3.6531e-05	3.69765e-05	4.455e-07	3.6531e-05	3.6531e-05	3.6531e-05	3.6531e-05	0	3.7422e-05	3.7422e-05	3.7422e-05	3.8313e-05	3.76447e-05	3.85814e-07	3.7422e-05	3.7422e-05	3.7422e-05	0	1.782e-05	1.74636e-05
rxn04454_c0	rxn04454 c0	S_cpd00658[c] -> S_cpd00020[c] + S_cpd00599[c]	((CAETHG_RS05755) or (CAETHG_RS03505))	CAETHG_RS03505 CAETHG_RS05755		YgfZ	0	0	1000	4.1.99.-	Isochorismate -> Pyruvate + SALC		0	0	0	0	0	0	0	0	0	0	0	0	0	0	0	0	0	0	0	0	0	0	0	0	0	0	0	0	0	0	0	0	0	0	0	0	0
rxn00193_c0	L-Glutamate racemase c0	S_cpd00023[c] <=> S_cpd00186[c]	(CAETHG_RS09890)	CAETHG_RS09890		Peptidoglycan Biosynthesis|Poly-gamma-glutamate biosynthesis|Peptidoglycan Biosynthesis 2|Glutamine, Glutamate, Aspartate and Asparagine Biosynthesis	1	-1000	1000	5.1.1.3	L-Glutamate <=> D-Glutamate		0	0	0	0	0	0	0	0	0	0	0	0	0	0	0	0	0	0	0	0	0	0	0	0	0	0	0	0	0	0	0	0	0	0	0	0	0
rxn05175_c0	Spermidine-ABC transport c0	S_cpd00001[c] + S_cpd00002[c] + S_cpd00264[e] -> S_cpd00008[c] + S_cpd00009[c] + S_cpd00067[c] + S_cpd00264[c]	(() and (CAETHG_RS03250) and () and ((CAETHG_RS01240) or (CAETHG_RS03255)) and (CAETHG_RS03260) and () and ((CAETHG_RS03245) or (CAETHG_RS01235)))	CAETHG_RS01235 CAETHG_RS01240 CAETHG_RS03245 CAETHG_RS03250 CAETHG_RS03255 CAETHG_RS03260			0	0	1000		H2O + ATP + Spermidine -> ADP + Phosphate + H+ + Spermidine		0	0	0	0	0	0	0	0	0	0	0	0	0	0	0	0	0	0	0	0	0	0	0	0	0	0	0	0	0	0	0	0	0	0	0	0	0
rxn08294_c0	diacylglycerol kinase (n-C12:0) c0	S_cpd00002[c] + S_cpd15306[c] <=> S_cpd00008[c] + S_cpd15521[c]	(CAETHG_RS14270)	CAETHG_RS14270		Glycerolipid and Glycerophospholipid Metabolism in Bacteria	1	-1000	1000	2.7.1.107	ATP + 1,2-Diacyl-sn-glycerol didodecanoyl <=> ADP + 1,2-didodecanoyl-sn-glycerol 3-phosphate		0	0	0	0	0	0	0	0	0	0	0	0	0	0	0	0	0	0	0	0	0	0	0	0	0	0	0	0	0	0	0	0	0	0	0	0	0
rxn05958_c0	S-(5-deoxy-D-ribos-5-yl)-L-homocysteine homocysteine-lyase c0	S_cpd02227[c] -> S_cpd00135[c] + S_cpd08636[c]	(CAETHG_RS01960)	CAETHG_RS01960		Methionine Biosynthesis|Autoinducer 2 (AI-2) transport and processing (lsrACDBFGE operon)	0	0	1000	4.4.1.21	S-Ribosylhomocysteine -> Homocysteine + 4-5-dihydroxy-2-3-pentanedione		0	0	0	0	0	0	0	0	0	0	0	0	0	0	0	0	0	0	0	0	0	0	0	0	0	0	0	0	0	0	0	0	0	0	0	0	0
rxn12844_c0	Gly-Cys aminopeptidase c0	S_cpd00001[c] + S_cpd15603[c] <=> S_cpd00033[c] + S_cpd00084[c]	(((CAETHG_RS04585) or (CAETHG_RS15660)) or (CAETHG_RS03545) or (CAETHG_RS07155))	CAETHG_RS03545 CAETHG_RS04585 CAETHG_RS07155 CAETHG_RS15660		Recycling of Peptidoglycan Amino Acids|Protein degradation	1	-1000	1000	3.4.11.2	H2O + Gly-Cys <=> Glycine + L-Cysteine		0	0	0	0	0	0	0	0	0	0	0	0	0	0	0	0	0	0	0	0	0	0	0	0	0	0	0	0	0	0	0	0	0	0	0	0	0
rxn01332_c0	Phosphoenolpyruvate:D-erythrose-4-phosphate c0	S_cpd00001[c] + S_cpd00061[c] + S_cpd00236[c] -> S_cpd00009[c] + S_cpd00067[c] + S_cpd02857[c]	((CAETHG_RS04350) and (CAETHG_RS17555) and ())	CAETHG_RS04350 CAETHG_RS17555		Chorismate synthesis	0	0	1000	2.5.1.54	H2O + Phosphoenolpyruvate + D-Erythrose4-phosphate -> Phosphate + H+ + DAHP		0.00573255	0.00573255	0.00573255	0.00587236	0.0057675	6.05431e-05	0.00587236	0.00587236	0.00573255	0.00587236	0.00583741	6.05431e-05	0.00573255	0.00587236	0.00580246	6.99091e-05	0.00587236	0.00573255	0.00580246	6.99091e-05	0.00573255	0.00573255	0.00573255	0.00573255	0	0.00587236	0.00587236	0.00587236	0.00601218	0.00590732	6.05431e-05	0.00587236	0.00587236	0.00587236	0	0.00279636	0.00274044
rxn01858_c0	Deoxyadenosine aminohydrolase c0	S_cpd00001[c] + S_cpd00067[c] + S_cpd00438[c] -> S_cpd00013[c] + S_cpd03279[c]	(CAETHG_RS03915)	CAETHG_RS03915		Purine conversions|Menaqui Biosynthesis via Futalosine	0	0	1000	3.5.4.4	H2O + H+ + Deoxyadenosine -> NH3 + Deoxyinosine		0	0	0	0	0	0	0	0	0	0	0	0	0	0	0	0	0	0	0	0	0	0	0	0	0	0	0	0	0	0	0	0	0	0	0	0	0
rxn08657_c0	Glycolate oxidase c0	S_cpd00139[c] + S_cpd15352[c] -> S_cpd00040[c] + S_cpd15353[c]	(() and ((CAETHG_RS01815) or (CAETHG_RS13190) or (CAETHG_RS01160) or (CAETHG_RS00560) or (CAETHG_RS17055)) and ())	CAETHG_RS00560 CAETHG_RS01160 CAETHG_RS01815 CAETHG_RS13190 CAETHG_RS17055		Photorespiration (oxidative C2 cycle)|Glycolate, glyoxylate interconversions	0	0	1000		Glycolate + 2-Demethylmenaquinone 8 -> Glyoxalate + 2-Demethylmenaquinol 8		0	0	0	0	0	0	0	0	0	0	0	0	0	0	0	0	0	0	0	0	0	0	0	0	0	0	0	0	0	0	0	0	0	0	0	0	0
rxn09208_c0	Phosphatidylserine syntase (n-C16:0) c0	S_cpd00054[c] + S_cpd15419[c] -> S_cpd00046[c] + S_cpd00067[c] + S_cpd15555[c]	(CAETHG_RS11850)	CAETHG_RS11850		Glycerolipid and Glycerophospholipid Metabolism in Bacteria	0	0	1000	2.7.8.8	L-Serine + CDP-1,2-dihexadecanoylglycerol -> CMP + H+ + phosphatidylserine dihexadecanoyl		0	0	0	0	0	0	0	0	0	0	0	0	0	0	0	0	0	0	0	0	0	0	0	0	0	0	0	0	0	0	0	0	0	0	0	0	0
rxn05567_c0	Galactitol transport via PEP:Pyr PTS c0	S_cpd00061[c] + S_cpd01171[e] <=> S_cpd00020[c] + S_cpd03752[c]	(() and () and (CAETHG_RS09185) and () and ())	CAETHG_RS09185		D-Tagatose and Galactitol utilisation	1	-1000	1000		Phosphoenolpyruvate + Dulcose <=> Pyruvate + Galactitol 1-phosphate		0	0	0	0	0	0	0	0	0	0	0	0	0	0	0	0	0	0	0	0	0	0	0	0	0	0	0	0	0	0	0	0	0	0	0	0	0
rxn10060_c0	NAD kinase (dTTP) c0	S_cpd00003[c] + S_cpd00357[c] <=> S_cpd00006[c] + S_cpd00297[c]	(CAETHG_RS15750)	CAETHG_RS15750		NAD and NADP cofactor biosynthesis global	1	-1000	1000	2.7.1.23	NAD + TTP <=> NADP + dTDP		0	0	0	0	0	0	0	0	0	0	0	0	0	0	0	0	0	0	0	0	0	0	0	0	0	0	0	0	0	0	0	0	0	0	0	0	0
rxn06377_c0	glycine:lipoylprotein oxidoreductase (decarboxylating and c0	S_cpd00033[c] + S_cpd00067[c] + S_cpd12005[c] -> S_cpd00011[c] + S_cpd11830[c]	((CAETHG_RS02260) or (CAETHG_RS02255))	CAETHG_RS02255 CAETHG_RS02260		Glycine cleage system	0	0	1000	1.4.4.2	Glycine + H+ + Lipoylprotein -> CO2 + S-Aminomethyldihydrolipoylprotein		0	0	0	0	0	0	0	0	0	0	0	0	0	0	0	0	0	0	0	0	0	0	0	0	0	0	0	0	0	0	0	0	0	0	0	0	0
rxn00762_c0	Glycerol:NAD+ oxidoreductase c0	S_cpd00003[c] + S_cpd00100[c] <=> S_cpd00004[c] + S_cpd00067[c] + S_cpd00157[c]	((CAETHG_RS03495) or (CAETHG_RS03870))	CAETHG_RS03495 CAETHG_RS03870		Glycerol fermenation to 1,3-propanediol|Glycerol and Glycerol-3-phosphate Uptake and utilisation|Respiratory dehydrogenases 1	1	-1000	1000	1.1.1.6	NAD + Glycerol <=> NADH + H+ + Glycerone		0	0	0	0	0	0	0	0	0	0	0	0	0	0	0	0	0	0	0	0	0	0	0	0	0	0	0	0	0	0	0	0	0	0	0	0	0
rxn00100_c0	ATP:dephospho-CoA 3'-phosphotransferase c0	S_cpd00002[c] + S_cpd00655[c] -> S_cpd00008[c] + S_cpd00010[c]	(CAETHG_RS06040)	CAETHG_RS06040		Coenzyme A Biosynthesis	0	0	1000	2.7.1.24	ATP + Dephospho-CoA -> ADP + CoA		1.42065e-06	1.42065e-06	1.42065e-06	1.4553e-06	1.42931e-06	1.50039e-08	1.4553e-06	1.4553e-06	1.42065e-06	1.4553e-06	1.44664e-06	1.50039e-08	1.42065e-06	1.4553e-06	1.43798e-06	1.7325e-08	1.4553e-06	1.42065e-06	1.43797e-06	1.7325e-08	1.42065e-06	1.42065e-06	1.42065e-06	1.42065e-06	5.93682e-16	1.4553e-06	1.4553e-06	1.4553e-06	1.48995e-06	1.46396e-06	1.50039e-08	1.4553e-06	1.4553e-06	1.4553e-06	0	6.93e-07	6.7914e-07
rxn01018_c0	Carbamoyl-phosphate:L-aspartate carbamoyltransferase c0	S_cpd00041[c] + S_cpd00146[c] -> S_cpd00009[c] + 2 S_cpd00067[c] + S_cpd00343[c]	((CAETHG_RS07125) or ((CAETHG_RS17835) or (CAETHG_RS07130)))	CAETHG_RS07125 CAETHG_RS07130 CAETHG_RS17835		De Novo Pyrimidine Synthesis	0	0	1000	2.1.3.2	L-Aspartate + Carbamoylphosphate -> Phosphate + 2 H+ + N-Carbamoyl-L-aspartate		0.00983736	0.00983736	0.00983736	0.0100773	0.00989734	0.000103895	0.0100773	0.0100773	0.00983736	0.0100773	0.0100173	0.000103895	0.00983736	0.0100773	0.00995733	0.000119968	0.0100773	0.00983736	0.00995733	0.000119968	0.00983736	0.00983736	0.00983736	0.00983736	5.93682e-16	0.0100773	0.0100773	0.0100773	0.0103172	0.0101373	0.000103895	0.0100773	0.0100773	0.0100773	0	0.00479871	0.00470274
rxn05656_c0	sulfoacetate transport via ABC system c0	S_cpd00001[c] + S_cpd00002[c] + S_cpd09878[e] -> S_cpd00008[c] + S_cpd00009[c] + S_cpd00067[c] + S_cpd09878[c]	(() and ((CAETHG_RS03470) or (CAETHG_RS19320)) and ((CAETHG_RS03465) or (CAETHG_RS19325)))	CAETHG_RS03465 CAETHG_RS03470 CAETHG_RS19320 CAETHG_RS19325		Alkanesulfonate assimilation|Alkanesulfonates utilisation	0	0	1000		H2O + ATP + Sulfoacetate -> ADP + Phosphate + H+ + Sulfoacetate		0	0	0	0	0	0	0	0	0	0	0	0	0	0	0	0	0	0	0	0	0	0	0	0	0	0	0	0	0	0	0	0	0	0	0	0	0
rxn00806_c0	L-Leucine:2-oxoglutarate aminotransferase c0	S_cpd00024[c] + S_cpd00107[c] <=> S_cpd00023[c] + S_cpd00200[c]	((CAETHG_RS14595) or (CAETHG_RS17440) or (CAETHG_RS14905))	CAETHG_RS14595 CAETHG_RS14905 CAETHG_RS17440		Leucine biosynthesis	1	-1000	1000	2.6.1.6/2.6.1.42	2-Oxoglutarate + L-Leucine <=> L-Glutamate + 4MOP		-0.00856853	-0.00856853	-0.00856853	-0.00877752	-0.00862078	9.04947e-05	-0.00877752	-0.00877752	-0.00856853	-0.00877752	-0.00872527	9.04947e-05	-0.00856853	-0.00877752	-0.00867302	0.000104494	-0.00877752	-0.00856853	-0.00867302	0.000104494	-0.00856853	-0.00856853	-0.00856853	-0.00856853	0	-0.00877752	-0.00877752	-0.00877752	-0.00898651	-0.00882976	9.04947e-05	-0.00877752	-0.00877752	-0.00877752	0	-0.00417977	-0.00409617
rxn02834_c0	Phosphoribosyl-ATP pyrophosphohydrolase c0	S_cpd00001[c] + S_cpd01775[c] -> S_cpd00012[c] + S_cpd01777[c]	((CAETHG_RS16035) and (CAETHG_RS16030))	CAETHG_RS16030 CAETHG_RS16035		Histidine Biosynthesis	0	0	1000	3.6.1.31	H2O + Phosphoribosyl-ATP -> PPi + Phosphoribosyl-AMP		0.000822232	0.000822232	0.000822232	0.000842286	0.000827245	8.68382e-06	0.000842286	0.000842286	0.000822232	0.000842286	0.000837272	8.68382e-06	0.000822232	0.000842286	0.000832259	1.00272e-05	0.000842286	0.000822232	0.000832259	1.00272e-05	0.000822232	0.000822232	0.000822232	0.000822232	1.0842e-19	0.000842286	0.000842286	0.000842286	0.000862341	0.0008473	8.68382e-06	0.000842286	0.000842286	0.000842286	0	0.000401089	0.000393067
rxn10121_c0	Nitrate reductase (Menaquinol-8) c0	2 S_cpd00067[c] + S_cpd00209[c] + S_cpd15499[c] <=> S_cpd00001[c] + 2 S_cpd00067[e] + S_cpd00075[c] + S_cpd15500[c]	(CAETHG_RS02085)	CAETHG_RS02085		Nitrate and nitrite ammonification	1	-1000	1000		2 H+ + Nitrate + Menaquinol 8 <=> H2O + 2 H+ + Nitrite + Menaquinone 8		0	0	0	0	0	0	0	0	0	0	0	0	0	0	0	0	0	0	0	0	0	0	0	0	0	0	0	0	0	0	0	0	0	0	0	0	0
rxn02341_c0	N-[(R)-4'-Phosphopantothenoyl]-L-cysteine carboxy-lyase c0	S_cpd00067[c] + S_cpd02666[c] -> S_cpd00011[c] + S_cpd00834[c]	(((CAETHG_RS09010) or (CAETHG_RS16385)) and (CAETHG_RS16385))	CAETHG_RS09010 CAETHG_RS16385		Coenzyme A Biosynthesis	0	0	1000	4.1.1.36	H+ + (R)-4-Phosphopantothenoyl-L-cysteine -> CO2 + Phosphopantetheine		1.42065e-06	1.42065e-06	1.42065e-06	1.4553e-06	1.42931e-06	1.50039e-08	1.4553e-06	1.4553e-06	1.42065e-06	1.4553e-06	1.44664e-06	1.50039e-08	1.42065e-06	1.4553e-06	1.43798e-06	1.7325e-08	1.4553e-06	1.42065e-06	1.43797e-06	1.7325e-08	1.42065e-06	1.42065e-06	1.42065e-06	1.42065e-06	5.93682e-16	1.4553e-06	1.4553e-06	1.4553e-06	1.48995e-06	1.46396e-06	1.50039e-08	1.4553e-06	1.4553e-06	1.4553e-06	0	6.93e-07	6.7914e-07
rxn09310_c0	thiazole phosphate synthesis c0	S_cpd00002[c] + S_cpd00069[c] + S_cpd00084[c] + S_cpd08289[c] -> S_cpd00001[c] + S_cpd00011[c] + S_cpd00012[c] + S_cpd00018[c] + S_cpd00035[c] + S_cpd02654[c] + S_cpd15378[c]	(() and () and ((CAETHG_RS01915) or (CAETHG_RS16170) or (CAETHG_RS03955) or (CAETHG_RS05885) or (CAETHG_RS05840)) and () and () and (CAETHG_RS03950))	CAETHG_RS01915 CAETHG_RS03950 CAETHG_RS03955 CAETHG_RS05840 CAETHG_RS05885 CAETHG_RS16170		Alanine biosynthesis|YgfZ|tRNA modification Bacteria|mcm5s2U biosynthesis in tRNA|Flavohaemoglobin|mnm5U34 biosynthesis bacteria|Fe-S cluster assembly|tRNA modification yeast cytoplasmic|tRNA modification Archaea	0	0	1000		ATP + L-Tyrosine + L-Cysteine + 1-deoxy-D-xylulose5-phosphate -> H2O + CO2 + PPi + AMP + L-Alanine + 4-Methyl-5-2-phosphoethyl-thiazole + 4-Hydroxy-benzylalcohol		9.13275e-06	9.13275e-06	9.13275e-06	9.3555e-06	9.18844e-06	9.64536e-08	9.3555e-06	9.3555e-06	9.13275e-06	9.3555e-06	9.29981e-06	9.64536e-08	9.13275e-06	9.3555e-06	9.24412e-06	1.11375e-07	9.3555e-06	9.13275e-06	9.24412e-06	1.11375e-07	9.13275e-06	9.13275e-06	9.13275e-06	9.13275e-06	0	9.3555e-06	9.3555e-06	9.3555e-06	9.57825e-06	9.41119e-06	9.64536e-08	9.3555e-06	9.3555e-06	9.3555e-06	0	4.455e-06	4.3659e-06
rxn03175_c0	N-(5'-Phospho-D-ribosylformimino)-5-amino-1- c0	S_cpd02979[c] <=> S_cpd02991[c]	(CAETHG_RS16015)	CAETHG_RS16015		Histidine Biosynthesis	1	-1000	1000	5.3.1.16	phosphoribosylformiminoaicar-phosphate <=> phosphoribulosylformimino-AICAR-phosphate		0.000822232	0.000822232	0.000822232	0.000842286	0.000827245	8.68382e-06	0.000842286	0.000842286	0.000822232	0.000842286	0.000837272	8.68382e-06	0.000822232	0.000842286	0.000832259	1.00272e-05	0.000842286	0.000822232	0.000832259	1.00272e-05	0.000822232	0.000822232	0.000822232	0.000822232	0	0.000842286	0.000842286	0.000842286	0.000862341	0.0008473	8.68382e-06	0.000842286	0.000842286	0.000842286	0	0.000401089	0.000393067
rxn00157_c0	Acetyl-CoA:formate C-acetyltransferase c0	S_cpd00010[c] + S_cpd00020[c] -> S_cpd00022[c] + S_cpd00047[c]	(((CAETHG_RS16075) or (CAETHG_RS03170) or (CAETHG_RS08860)) or ((CAETHG_RS08855) or (CAETHG_RS03165) or (CAETHG_RS16080)))	CAETHG_RS03165 CAETHG_RS03170 CAETHG_RS08855 CAETHG_RS08860 CAETHG_RS16075 CAETHG_RS16080		Formate hydrogenase	0	0	1000	2.3.1.54	CoA + Pyruvate -> Acetyl-CoA + Formate		0	0	0	0	0	0	0	0	0	0	0	0	0	0	0	0	0	0	0	0	0	0	0	0	0	0	0	0	0	0	0	0	0	0	0	1.06191e-11	8.67854e-12
rxn05649_c0	D-serine transport in/out via proton symport c0	S_cpd00067[e] + S_cpd00550[e] <=> S_cpd00067[c] + S_cpd00550[c]	((CAETHG_RS12240) or (CAETHG_RS09250) or (CAETHG_RS14390) or (CAETHG_RS19125))	CAETHG_RS09250 CAETHG_RS12240 CAETHG_RS14390 CAETHG_RS19125		Transport Reactions	1	-1000	1000	proton	H+ + D-Serine <=> H+ + D-Serine		0	0	0	0	0	0	0	0	0	0	0	0	0	0	0	0	0	0	0	0	0	0	0	0	0	0	0	0	0	0	0	0	0	0	0	0	0
rxn10219_c0	isohexadecanoyl-1-acylglycerol-3-phosphate O-acyltransferase c0	S_cpd11441[c] + S_cpd15676[c] -> S_cpd00010[c] + S_cpd15682[c]	((CAETHG_RS13530) or (CAETHG_RS08580))	CAETHG_RS08580 CAETHG_RS13530		Phosphate metabolism|Glycerolipid and Glycerophospholipid Metabolism in Bacteria	0	0	1000	2.3.1.51	fa6coa + 1-isohexadecanoyl-sn-glycerol 3-phosphate -> CoA + 1,2-diisohexadecanoyl-sn-glycerol 3-phosphate		0	0	0	0	0	0	0	0	0	0	0	0	0	0	0	0	0	0	0	0	0	0	0	0	0	0	0	0	0	0	0	0	0	0	0	0	0
rxn00786_c0	D-Fructose-1,6-bisphosphate D-glyceraldehyde-3-phosphate-lyase c0	S_cpd00290[c] <=> S_cpd00095[c] + S_cpd00102[c]	((CAETHG_RS11740) or (CAETHG_RS10700))	CAETHG_RS10700 CAETHG_RS11740		Glycolysis/Gluconeogenesis	1	-1000	1000	4.1.2.13/5.3.1.1	D-fructose-1,6-bisphosphate <=> Glycerone-phosphate + Glyceraldehyde3-phosphate		-0.0362139	-0.0362139	-0.0362139	-0.0370972	-0.0364347	0.000382465	-0.0370972	-0.0370972	-0.0362139	-0.0370972	-0.0368764	0.000382465	-0.0362139	-0.0370972	-0.0366555	0.000441633	-0.0370972	-0.0362139	-0.0366555	0.000441633	-0.0362139	-0.0362139	-0.0362139	-0.0362139	1.07185e-13	-0.0370972	-0.0370972	-0.0370972	-0.0379804	-0.037318	0.000382465	-0.0370972	-0.0370972	-0.0370972	0	-0.0176653	-0.017312
rxn00074_c0	NADH:cob(II)alamin oxidoreductase c0	S_cpd00003[c] + S_cpd00067[c] + 2 S_cpd00635[c] <=> S_cpd00004[c] + 2 S_cpd00423[c]	(CAETHG_RS08830)	CAETHG_RS08830		Propanediol utilisation|Coenzyme B12 biosynthesis	1	-1000	1000	1.16.1.4	NAD + H+ + 2 Cbl <=> NADH + 2 Vitamin B12r		0	0	0	0	0	0	0	0	0	0	0	0	0	0	0	0	0	0	0	0	0	0	0	0	0	0	0	0	0	0	0	0	0	0	0	0	0
rxn01637_c0	N2-Acetyl-L-ornithine:2-oxoglutarate aminotransferase c0	S_cpd00024[c] + S_cpd00342[c] <=> S_cpd00023[c] + S_cpd00918[c]	((CAETHG_RS09670) or (CAETHG_RS01130))	CAETHG_RS01130 CAETHG_RS09670		Glutamate and Ornithine metabolism	1	-1000	1000	2.6.1.11	2-Oxoglutarate + N-Acetylornithine <=> L-Glutamate + 2-Acetamido-5-oxopentanoate		0	0	0	0	0	0	0	0	0	0	0	0	0	0	0	0	0	0	0	0	0	0	0	0	0	0	0	0	0	0	0	0	0	0	0	0	0
rxn09674_c0	L-lysine reversible transport via proton symport c0	S_cpd00039[e] + S_cpd00067[e] <=> S_cpd00039[c] + S_cpd00067[c]	((CAETHG_RS02360) or (CAETHG_RS01275))	CAETHG_RS01275 CAETHG_RS02360		Transport Reactions	1	-1000	1000	proton	L-Lysine + H+ <=> L-Lysine + H+		0	0	0	0	0	0	0	0	0	0	0	0	0	0	0	0	0	0	0	0	0	0	0	0	0	0	0	0	0	0	0	0	0	0	0	0	0
rxn00689_c0	Tetrahydrofolate:L-glutamate gamma-ligase (ADP-forming) c0	S_cpd00002[c] + S_cpd00023[c] + S_cpd00087[c] -> S_cpd00008[c] + S_cpd00009[c] + S_cpd00067[c] + S_cpd06227[c]	((CAETHG_RS06580) and (CAETHG_RS06580))	CAETHG_RS06580		Folate Biosynthesis|Folate Biosynthesis (Phoenix Copy)	0	0	1000	6.3.2.17	ATP + L-Glutamate + Tetrahydrofolate -> ADP + Phosphate + H+ + THF-L-glutamate		0	0	0	0	0	0	0	0	0	0	0	0	0	0	0	0	0	0	0	0	0	0	0	0	0	0	0	0	0	0	0	0	0	0	0	0	0
rxn12640_c0	aminopeptidase c0	S_cpd00001[c] + S_cpd11586[c] <=> S_cpd00023[c] + S_cpd00035[c]	(((CAETHG_RS04585) or (CAETHG_RS15660)) or (CAETHG_RS03545) or (CAETHG_RS07155))	CAETHG_RS03545 CAETHG_RS04585 CAETHG_RS07155 CAETHG_RS15660		Recycling of Peptidoglycan Amino Acids|Protein degradation	1	-1000	1000		H2O + ala-L-glu-L <=> L-Glutamate + L-Alanine		0	0	0	0	0	0	0	0	0	0	0	0	0	0	0	0	0	0	0	0	0	0	0	0	0	0	0	0	0	0	0	0	0	0	0	0	0
rxn10206_c0	anteisoheptadecanoyl-glycerol-3-phosphate O-acyltransferase c0	S_cpd00080[c] + S_cpd11434[c] -> S_cpd00010[c] + S_cpd15672[c]	(() and (CAETHG_RS16510))	CAETHG_RS16510		Glycerolipid and Glycerophospholipid Metabolism in Bacteria	0	0	1000	2.3.1.15	Glycerol-3-phosphate + fa12coa -> CoA + 1-anteisoheptadecanoyl-sn-glycerol 3-phosphate		0	0	0	0	0	0	0	0	0	0	0	0	0	0	0	0	0	0	0	0	0	0	0	0	0	0	0	0	0	0	0	0	0	0	0	0	0
rxn05376_c0	12-methyl-3-oxo-tetra-decanoyl-ACP:NADP+ oxidoreductase c0	S_cpd00005[c] + S_cpd00067[c] + S_cpd11512[c] <=> S_cpd00006[c] + S_cpd11513[c]	((CAETHG_RS08435) or (CAETHG_RS00375) or (CAETHG_RS00860) or (CAETHG_RS04365) or (CAETHG_RS06705) or (CAETHG_RS03500) or (CAETHG_RS04680) or (CAETHG_RS09990))	CAETHG_RS00375 CAETHG_RS00860 CAETHG_RS03500 CAETHG_RS04365 CAETHG_RS04680 CAETHG_RS06705 CAETHG_RS08435 CAETHG_RS09990		mycolic acid synthesis|Fatty Acid Biosynthesis FASII	1	-1000	1000	1.1.1.0	NADPH + H+ + 12-methyl-3-oxo-tetra-decanoyl-ACP <=> NADP + 12-methyl-3-hydroxy-tetra-decanoyl-ACP		0	0	0	0	0	0	0	0	0	0	0	0	0	0	0	0	0	0	0	0	0	0	0	0	0	0	0	0	0	0	0	0	0	0	0	0	0
rxn05342_c0	(3R)-3-Hydroxytetradecanoyl-[acyl-carrier-protein]:NADP+ c0	S_cpd00006[c] + S_cpd11484[c] <=> S_cpd00005[c] + S_cpd00067[c] + S_cpd11491[c]	((CAETHG_RS08435) or (CAETHG_RS00375) or (CAETHG_RS00860) or (CAETHG_RS04365) or (CAETHG_RS06705) or (CAETHG_RS03500) or (CAETHG_RS04680) or (CAETHG_RS09990))	CAETHG_RS00375 CAETHG_RS00860 CAETHG_RS03500 CAETHG_RS04365 CAETHG_RS04680 CAETHG_RS06705 CAETHG_RS08435 CAETHG_RS09990		mycolic acid synthesis|Fatty Acid Biosynthesis FASII	1	-1000	1000		NADP + HMA <=> NADPH + H+ + 3-oxotetradecanoyl-acp		0	0	0	0	0	0	0	0	0	0	0	0	0	0	0	0	0	0	0	0	0	0	0	0	0	0	0	0	0	0	0	0	0	0	0	0	0
rxn06510_c0	Lauroyl-CoA:acetyl-CoA C-acyltransferase c0	S_cpd00022[c] + S_cpd01260[c] <=> S_cpd00010[c] + S_cpd12689[c]	(CAETHG_RS02035)	CAETHG_RS02035		Isobutyryl-CoA to Propionyl-CoA Module|Isoleucine degradation|Branched chain amino acid degradation regulons	1	-1000	1000	2.3.1.16	Acetyl-CoA + Lauroyl-CoA <=> CoA + 3-Oxotetradecanoyl-CoA		0	0	0	0	0	0	0	0	0	0	0	0	0	0	0	0	0	0	0	0	0	0	0	0	0	0	0	0	0	0	0	0	0	0	0	0	0
rxn10278_c0	anteisopentadecanoyl-UDP-glucosyltransferase (diglucosyl) c0	S_cpd00026[c] + S_cpd15744[c] <=> S_cpd00014[c] + S_cpd15735[c]	(CAETHG_RS11420)	CAETHG_RS11420		Teichoic and lipoteichoic acids biosynthesis	1	-1000	1000		UDP-glucose + Monoglucosyl-1,2 dianteisopentadecanoylglycerol <=> UDP + Diglucosyl-1,2 dianteisopentadecanoylglycerol		0	0	0	0	0	0	0	0	0	0	0	0	0	0	0	0	0	0	0	0	0	0	0	0	0	0	0	0	0	0	0	0	0	0	0	0	0
rxn05733_c0	cysteine synthase (Thiosulfate) c0	S_cpd00268[c] + S_cpd00722[c] + S_cpd11421[c] -> S_cpd00029[c] + S_cpd00081[c] + S_cpd00084[c] + S_cpd11420[c]	((CAETHG_RS14360) or (CAETHG_RS08595))	CAETHG_RS08595 CAETHG_RS14360		Methionine Biosynthesis|Cysteine Biosynthesis	0	0	1000	4.2.99.8,2.5.1.47,2.5.1.49	H2S2O3 + O-Acetyl-L-serine + trdrd -> Acetate + Sulfite + L-Cysteine + trdox		0	0	0	0	0	0	0	0	0	0	0	0	0	0	0	0	0	0	0	0	0	0	0	0	0	0	0	0	0	0	0	0	0	0	0	0	0
rxn05350_c0	hexanoyl-[acyl-carrier protein]:malonyl-[acyl-carrier-protein] c0	S_cpd00067[c] + S_cpd11472[c] + S_cpd11492[c] -> S_cpd00011[c] + S_cpd11490[c] + S_cpd11493[c]	((CAETHG_RS10005) and (CAETHG_RS09985))	CAETHG_RS09985 CAETHG_RS10005		Fatty Acid Biosynthesis FASII	0	0	1000	2.3.1.41,2.3.1.85,2.3.1.86,2.3.1.179,2.3.1.180	H+ + Hexanoyl-ACP + Malonyl-acyl-carrierprotein -> CO2 + 3-oxooctanoyl-acp + ACP		0	0	0	0	0	0	0	0	0	0	0	0	0	0	0	0	0	0	0	0	0	0	0	0	0	0	0	0	0	0	0	0	0	0	0	0	0
rxn00720_c0	5,6-Dihydrouracil:NADP+ oxidoreductase c0	S_cpd00006[c] + S_cpd00337[c] <=> S_cpd00005[c] + S_cpd00067[c] + S_cpd00092[c]	(CAETHG_RS07185)	CAETHG_RS07185		Pyrimidine utilisation	1	-1000	1000	1.3.1.2	NADP + Hydrouracil <=> NADPH + H+ + Uracil		-1.42065e-06	-1.42065e-06	-1.42065e-06	-1.4553e-06	-1.42931e-06	1.50039e-08	-1.4553e-06	-1.4553e-06	-1.42065e-06	-1.4553e-06	-1.44664e-06	1.50039e-08	-1.42065e-06	-1.4553e-06	-1.43798e-06	1.7325e-08	-1.4553e-06	-1.42065e-06	-1.43798e-06	1.7325e-08	-1.42065e-06	-1.42065e-06	-1.42065e-06	-1.42065e-06	0	-1.4553e-06	-1.4553e-06	-1.4553e-06	-1.48995e-06	-1.46396e-06	1.50039e-08	-1.4553e-06	-1.4553e-06	-1.4553e-06	0	-6.93e-07	-6.7914e-07
rxn10255_c0	isotetradecanoyl-Diacylglycerol kinase c0	S_cpd00002[c] + S_cpd15703[c] <=> S_cpd00008[c] + S_cpd15679[c]	(CAETHG_RS14270)	CAETHG_RS14270		Glycerolipid and Glycerophospholipid Metabolism in Bacteria	1	-1000	1000	2.7.1.107	ATP + 1,2-Diisotetradecanoyl-sn-glycerol <=> ADP + 1,2-diisotetradecanoyl-sn-glycerol 3-phosphate		0	0	0	0	0	0	0	0	0	0	0	0	0	0	0	0	0	0	0	0	0	0	0	0	0	0	0	0	0	0	0	0	0	0	0	0	0
rxn10114_c0	formate dehydrogenase (quinone-8: 2 protons) c0	S_cpd00047[c] + 3 S_cpd00067[c] + S_cpd15560[c] -> S_cpd00011[c] + 2 S_cpd00067[e] + S_cpd15561[c]	(() and ((CAETHG_RS14690) or (CAETHG_RS13725) or (CAETHG_RS13720)) and () and () and () and () and ())	CAETHG_RS13720 CAETHG_RS13725 CAETHG_RS14690		Formate dehydrogenase	0	0	0	1.2.2.1	Formate + 3 H+ + Ubiquinone-8 -> CO2 + 2 H+ + Ubiquinol-8		0	0	0	0	0	0	0	0	0	0	0	0	0	0	0	0	0	0	0	0	0	0	0	0	0	0	0	0	0	0	0	0	0	0	0	0	0
rxn02569_c0	ATP:selenide, water phosphotransferase c0	S_cpd00001[c] + S_cpd00002[c] + S_cpd01078[c] <=> S_cpd00009[c] + S_cpd00018[c] + 2 S_cpd00067[c] + S_cpd03078[c]	(CAETHG_RS13960)	CAETHG_RS13960		Selenocysteine metabolism|tRNA modification Bacteria	1	-1000	1000	2.7.9.3	H2O + ATP + Selenide <=> Phosphate + AMP + 2 H+ + Selenophosphate		0	0	0	0	0	0	0	0	0	0	0	0	0	0	0	0	0	0	0	0	0	0	0	0	0	0	0	0	0	0	0	0	0	0	0	0	0
rxn00710_c0	Orotidine-5'-phosphate carboxy-lyase c0	S_cpd00067[c] + S_cpd00810[c] -> S_cpd00011[c] + S_cpd00091[c]	(CAETHG_RS07120)	CAETHG_RS07120		De Novo Pyrimidine Synthesis	0	0	1000	4.1.1.23	H+ + Orotidylic acid -> CO2 + UMP		0.00983736	0.00983736	0.00983736	0.0100773	0.00989734	0.000103895	0.0100773	0.0100773	0.00983736	0.0100773	0.0100173	0.000103895	0.00983736	0.0100773	0.00995733	0.000119968	0.0100773	0.00983736	0.00995733	0.000119968	0.00983736	0.00983736	0.00983736	0.00983736	5.93682e-16	0.0100773	0.0100773	0.0100773	0.0103172	0.0101373	0.000103895	0.0100773	0.0100773	0.0100773	0	0.00479871	0.00470274
rxn05539_c0	Dipeptide transport via ABC system (cgly) c0	S_cpd00001[c] + S_cpd00002[c] + S_cpd01017[e] -> S_cpd00008[c] + S_cpd00009[c] + S_cpd00067[c] + S_cpd01017[c]	(CAETHG_RS07520)	CAETHG_RS07520		ABC transporter dipeptide (TC 3.A.1.5.2)	0	0	1000		H2O + ATP + Cys-Gly -> ADP + Phosphate + H+ + Cys-Gly		0	0	0	0	0	0	0	0	0	0	0	0	0	0	0	0	0	0	0	0	0	0	0	0	0	0	0	0	0	0	0	0	0	0	0	0	0
rxn02775_c0	S-Adenosyl-L-methionine:precorrin-4 C20-methyltransferase c0	S_cpd00017[c] + S_cpd00067[c] + S_cpd01620[c] <=> S_cpd00019[c] + S_cpd03420[c]	(CAETHG_RS05350)	CAETHG_RS05350		Cobalamin synthesis|Transport of Nickel and Cobalt|Coenzyme B12 biosynthesis	1	-1000	1000	2.1.1.130	S-Adenosyl-L-methionine + H+ + Precorrin 2 <=> S-Adenosyl-homocysteine + Precorrin 3A		0	0	0	0	0	0	0	0	0	0	0	0	0	0	0	0	0	0	0	0	0	0	0	0	0	0	0	0	0	0	0	0	0	0	0	0	0
rxn10280_c0	palmitoyl-UDP-glucosyltransferase (monoglucosyl) c0	S_cpd00026[c] + S_cpd15309[c] <=> S_cpd00014[c] + S_cpd15737[c]	(CAETHG_RS11420)	CAETHG_RS11420		Teichoic and lipoteichoic acids biosynthesis	1	-1000	1000		UDP-glucose + 1,2-Diacyl-sn-glycerol dihexadecanoyl <=> UDP + Monoglucosyl-1,2 dipalmitoylglycerol		0	0	0	0	0	0	0	0	0	0	0	0	0	0	0	0	0	0	0	0	0	0	0	0	0	0	0	0	0	0	0	0	0	0	0	0	0
rxn00717_c0	Cytosine aminohydrolase c0	S_cpd00001[c] + S_cpd00067[c] + S_cpd00307[c] -> S_cpd00013[c] + S_cpd00092[c]	((CAETHG_RS19880) or (CAETHG_RS04720))	CAETHG_RS04720 CAETHG_RS19880		Pyrimidine conversions	0	0	1000	3.5.4.1	H2O + H+ + Cytosine -> NH3 + Uracil		0	0	0	0	0	0	0	0	0	0	0	0	0	0	0	0	0	0	0	0	0	0	0	0	0	0	0	0	0	0	0	0	0	0	0	0	0
rxn01642_c0	4-imidazolone-5-propanoate amidohydrolase c0	S_cpd00001[c] + S_cpd02311[c] -> S_cpd00344[c]	(CAETHG_RS01110)	CAETHG_RS01110		Histidine degradation	0	0	1000	3.5.2.7	H2O + 4-Imidazolone-5-propanoate -> N-Formimino-L-glutamate		0	0	0	0	0	0	0	0	0	0	0	0	0	0	0	0	0	0	0	0	0	0	0	0	0	0	0	0	0	0	0	0	0	0	0	0	0
rxn00545_c0	ATP:D-fructose-6-phosphate 1-phosphotransferase c0	S_cpd00002[c] + S_cpd00072[c] -> S_cpd00008[c] + S_cpd00290[c]	((CAETHG_RS03075) or (CAETHG_RS12015))	CAETHG_RS03075 CAETHG_RS12015		Glycolysis/Gluconeogenesis	0	0	1000	2.7.1.11	ATP + D-fructose-6-phosphate -> ADP + D-fructose-1,6-bisphosphate		0	0	0	0	0	0	0	0	0	0	0	0	0	0	0	0	0	0	0	0	0	0	0	0	0	0	0	0	0	0	0	0	0	0	0	0	0
rxn10308_c0	myristoyl-lipoteichoic acid synthesis (n-24), linked, N-acetylglucosamine substituted c0	24 S_cpd00037[c] + S_cpd15747[c] <=> 24 S_cpd00014[c] + S_cpd15765[c]	(CAETHG_RS11510)	CAETHG_RS11510		Teichoic and lipoteichoic acids biosynthesis|Methicillin resistance in Staphylococci|Teichuronic acid biosynthesis	1	-1000	1000	2.7.8.-	24 UDP-N-acetylglucosamine + Myristoyllipoteichoic acid (n-24), linked, unsubstituted <=> 24 UDP + Myristoyllipoteichoic acid (n-24), linked, N-acetyl-D-glucosamine		0	0	0	0	0	0	0	0	0	0	0	0	0	0	0	0	0	0	0	0	0	0	0	0	0	0	0	0	0	0	0	0	0	0	0	0	0
rxn05249_c0	FACOAL150(ISO) c0	S_cpd00002[c] + S_cpd00010[c] + S_cpd00067[c] + S_cpd11436[c] -> S_cpd00012[c] + S_cpd00018[c] + S_cpd11437[c]	(CAETHG_RS08635)	CAETHG_RS08635		Fatty acid degradation regulons|Unsaturated Fatty Acid Metabolism|Carbonate Biomineralization|n-Phenylalkanoic acid degradation|Biotin biosynthesis	0	0	1000	6.2.1.3	ATP + CoA + H+ + fa3 -> PPi + AMP + fa3coa		0	0	0	0	0	0	0	0	0	0	0	0	0	0	0	0	0	0	0	0	0	0	0	0	0	0	0	0	0	0	0	0	0	0	0	0	0
rxn02897_c0	Nicotinate-nucleotide:dimethylbenzimidazole c0	S_cpd00873[c] + S_cpd01997[c] <=> S_cpd00067[c] + S_cpd00218[c] + S_cpd02904[c]	(CAETHG_RS05375)	CAETHG_RS05375		Cobalamin synthesis|Experimental tye|Coenzyme B12 biosynthesis|Heme and Siroheme Biosynthesis	1	-1000	1000	2.4.2.21	Nicotinate ribonucleotide + Dimethylbenzimidazole <=> H+ + Niacin + alpha-Ribazole 5-phosphate		0	0	0	0	0	0	0	0	0	0	0	0	0	0	0	0	0	0	0	0	0	0	0	0	0	0	0	0	0	0	0	0	0	0	0	0	0
rxn01649_c0	Xanthosine:orthophosphate ribosyltransferase c0	S_cpd00009[c] + S_cpd00067[c] + S_cpd01217[c] <=> S_cpd00309[c] + S_cpd00475[c]	(CAETHG_RS00760)	CAETHG_RS00760		Xanthosine utilisation (xap region)	1	-1000	1000	2.4.2.1	Phosphate + H+ + Xanthosine <=> XAN + Ribose 1-phosphate		0	0	0	0	0	0	0	0	0	0	0	0	0	0	0	0	0	0	0	0	0	0	0	0	0	0	0	0	0	0	0	0	0	0	0	0	0
rxn01301_c0	L-Homoserine:NAD+ oxidoreductase c0	S_cpd00003[c] + S_cpd00227[c] <=> S_cpd00004[c] + S_cpd00067[c] + S_cpd00346[c]	((CAETHG_RS15215) or (CAETHG_RS13805))	CAETHG_RS13805 CAETHG_RS15215		Threonine and Homoserine Biosynthesis|Methionine Biosynthesis	1	-1000	1000	1.1.1.3	NAD + L-Homoserine <=> NADH + H+ + L-Aspartate4-semialdehyde		-0.0318317	-0.0318317	-0.0318317	-0.0326081	-0.0320258	0.000336183	-0.0326081	-0.0326081	-0.0318317	-0.0326081	-0.032414	0.000336183	-0.0318317	-0.0326081	-0.0322199	0.000388191	-0.0326081	-0.0318317	-0.0322199	0.000388191	-0.0318317	-0.0318317	-0.0318317	-0.0318317	7.97772e-12	-0.0326081	-0.0326081	-0.0326081	-0.0333844	-0.0328022	0.000336183	-0.0326081	-0.0326081	-0.0326081	0	-0.0155277	-0.0152171
rxn05396_c0	9-methyl-decanoyl-ACP:malonyl-[acyl-carrier-protein] C-acyltransferase (decarboxylating) c0	S_cpd00067[c] + S_cpd11492[c] + S_cpd11532[c] -> S_cpd00011[c] + S_cpd11493[c] + S_cpd11533[c]	((CAETHG_RS10005) and (CAETHG_RS09985))	CAETHG_RS09985 CAETHG_RS10005		Fatty Acid Biosynthesis FASII	0	0	1000	2.3.1.0	H+ + Malonyl-acyl-carrierprotein + 9-methyl-decanoyl-ACP -> CO2 + ACP + 11-methyl-3-oxo-dodecanoyl-ACP		0	0	0	0	0	0	0	0	0	0	0	0	0	0	0	0	0	0	0	0	0	0	0	0	0	0	0	0	0	0	0	0	0	0	0	0	0
rxn04046_c0	S-adenosyl-L-methionine:cobalt-factor-II C20-methyltransferase c0	S_cpd00017[c] + S_cpd08368[c] <=> S_cpd00019[c] + S_cpd00067[c] + S_cpd08369[c]	(CAETHG_RS05350)	CAETHG_RS05350		Cobalamin synthesis|Transport of Nickel and Cobalt|Coenzyme B12 biosynthesis	1	-1000	1000	2.1.1.151	S-Adenosyl-L-methionine + Cobalt-precorrin 2 <=> S-Adenosyl-homocysteine + H+ + Cobalt-precorrin 3		0	0	0	0	0	0	0	0	0	0	0	0	0	0	0	0	0	0	0	0	0	0	0	0	0	0	0	0	0	0	0	0	0	0	0	0	0
rxn13782_c0	Protein biosynthesis c0	S_cpd17041[e] -> S_cpd17041[c]	((CAETHG_RS09660) and (CAETHG_RS09360) and (CAETHG_RS09355) and (CAETHG_RS09380) and (CAETHG_RS09430) and (CAETHG_RS10280) and ((CAETHG_RS09555) or (CAETHG_RS00810)) and (CAETHG_RS09370) and (CAETHG_RS09420) and (CAETHG_RS09425) and (CAETHG_RS11455) and ((CAETHG_RS09925) or (CAETHG_RS13600)) and (CAETHG_RS06475) and (CAETHG_RS08170) and (CAETHG_RS06445) and (CAETHG_RS13910) and (CAETHG_RS09460) a…	CAETHG_RS00810 CAETHG_RS01220 CAETHG_RS06070 CAETHG_RS06075 CAETHG_RS06445 CAETHG_RS06450 CAETHG_RS06460 CAETHG_RS06465 CAETHG_RS06475 CAETHG_RS06585 CAETHG_RS07530 CAETHG_RS07535 CAETHG_RS07540 CAETHG_RS08130 CAETHG_RS08170 CAETHG_RS09270 CAETHG_RS09275 CAETHG_RS09300 CAETHG_RS09310 CAETHG_RS09315 CAETHG_RS09320 CAETHG_RS09325 CAETHG_RS09345 CAETHG_RS09350 CAETHG_RS09355 CAETHG_RS09360 CAETHG_RS…		Ribosome LSU bacterial	0	0	1000		Protein biosynthesis -> Protein biosynthesis		0	0	0	0	0	0	0	0	0	0	0	0	0	0	0	0	0	0	0	0	0	0	0	0	0	0	0	0	0	0	0	0	0	0	0	0	0
rxn10334_c0	palmitoyl-cardiolipin synthase c0	2 S_cpd15538[c] <=> S_cpd00100[c] + S_cpd15791[c]	((CAETHG_RS14670) or (CAETHG_RS04280))	CAETHG_RS04280 CAETHG_RS14670		Glycerolipid and Glycerophospholipid Metabolism in Bacteria	1	-1000	1000		2 Phosphatidylglycerol dihexadecanoyl <=> Glycerol + Palmitoylcardiolipin (B. subtilis)		0	0	0	0	0	0	0	0	0	0	0	0	0	0	0	0	0	0	0	0	0	0	0	0	0	0	0	0	0	0	0	0	0	0	0	0	0
rxn00910_c0	NAD-dependent electron-bifurcating methylenetetrahydrofolate reductase	2 S_cpd00004[c] + S_cpd00125[c] + S_cpd11621[c] <=> 2 S_cpd00003[c] + S_cpd00345[c] + S_cpd11620[c]	(CAETHG_RS07830)	CAETHG_RS07830		Wood-Ljungdahl Pathway	1	-1000	1000	1.5.7.1/1.5.1.20	2 NADH + 5-10-Methylenetetrahydrofolate + Oxidizedferredoxin <=> 2 NAD + 5-Methyltetrahydrofolate + Reducedferredoxin		4.96618	4.90542	4.60546	5.03968	4.87918	0.16503	6.40792	6.44952	6.5199	6.19268	6.3925	0.122115	8.19016	7.72887	7.95952	0.230647	8.6883	8.3873	8.5378	0.150503	10.3135	10.2242	10.6437	10.3938	0.180416	10.2669	9.76313	11.0747	10.2803	10.3463	0.469384	21.2216	24.912	23.0668	1.84522	9.84438	10.2767
rxn02286_c0	UDP-N-acetylmuramate:L-alanine ligase (ADP-forming) c0	S_cpd00002[c] + S_cpd00035[c] + S_cpd00773[c] -> S_cpd00008[c] + S_cpd00009[c] + S_cpd00067[c] + S_cpd00890[c]	(CAETHG_RS09825)	CAETHG_RS09825		Peptidoglycan Biosynthesis|Peptidoglycan Biosynthesis 2	0	0	1000	6.3.2.8	ATP + L-Alanine + UDP-MurNAc -> ADP + Phosphate + H+ + UDP-N-acetylmuramoyl-L-alanine		0	0	0	0	0	0	0	0	0	0	0	0	0	0	0	0	0	0	0	0	0	0	0	0	0	0	0	0	0	0	0	0	0	0	0	0	0
rxn05363_c0	4-methyl-hexanoyl-ACP:malonyl-[acyl-carrier-protein] C-acyltransferase (decarboxylating) c0	S_cpd00067[c] + S_cpd11492[c] + S_cpd11499[c] -> S_cpd00011[c] + S_cpd11493[c] + S_cpd11500[c]	((CAETHG_RS10005) and (CAETHG_RS09985))	CAETHG_RS09985 CAETHG_RS10005		Fatty Acid Biosynthesis FASII	0	0	1000	2.3.1.0	H+ + Malonyl-acyl-carrierprotein + 4-methyl-hexanoyl-ACP -> CO2 + ACP + 6-methyl-3-oxo-octanoyl-ACP		0	0	0	0	0	0	0	0	0	0	0	0	0	0	0	0	0	0	0	0	0	0	0	0	0	0	0	0	0	0	0	0	0	0	0	0	0
rxn01682_c0	(1S,2R)-1-C-(indol-3-yl)glycerol 3-phosphate c0	S_cpd02210[c] <=> S_cpd00102[c] + S_cpd00359[c]	(() and (CAETHG_RS18200))	CAETHG_RS18200		Tryptophan synthesis	1	-1000	1000	4.2.1.20	Indoleglycerol phosphate <=> Glyceraldehyde3-phosphate + indol		0	0	0	0	0	0	0	0	0	0	0	0	0	0	0	0	0	0	0	0	0	0	0	0	0	0	0	0	0	0	0	0	0	0	0	0	0
rxn02474_c0	5-amino-6-(5-phosphoribitylamino)uracil:NADP+ 1'-oxidoreductase c0	S_cpd00006[c] + S_cpd02720[c] <=> S_cpd00005[c] + S_cpd00067[c] + S_cpd00931[c]	(CAETHG_RS01445)	CAETHG_RS01445		Riboflavin, FMN and FAD metabolism	1	-1000	1000	1.1.1.193	NADP + 5-Amino-6-5-phosphoribitylaminouracil <=> NADPH + H+ + 5-Amino-6-5-phosphoribosylaminouracil		-1.05534e-05	-1.05534e-05	-1.05534e-05	-1.08108e-05	-1.06177e-05	1.11457e-07	-1.08108e-05	-1.08108e-05	-1.05534e-05	-1.08108e-05	-1.07464e-05	1.11457e-07	-1.05534e-05	-1.08108e-05	-1.06821e-05	1.287e-07	-1.08108e-05	-1.05534e-05	-1.06821e-05	1.287e-07	-1.05534e-05	-1.05534e-05	-1.05534e-05	-1.05534e-05	0	-1.08108e-05	-1.08108e-05	-1.08108e-05	-1.10682e-05	-1.08751e-05	1.11458e-07	-1.08108e-05	-1.08108e-05	-1.08108e-05	0	-5.148e-06	-5.04504e-06
rxn01292_c0	L-Arabinose ketol-isomerase c0	S_cpd00224[c] <=> S_cpd00397[c]	(CAETHG_RS10965)	CAETHG_RS10965		L-Arabinose utilisation	1	-1000	1000	5.3.1.4	L-Arabinose <=> L-Ribulose		0	0	0	0	0	0	0	0	0	0	0	0	0	0	0	0	0	0	0	0	0	0	0	0	0	0	0	0	0	0	0	0	0	0	0	0	0
rxn10302_c0	anteisoheptadecanoyl-lipoteichoic acid synthesis (n-24), linked, glucose substituted c0	24 S_cpd00026[c] + S_cpd15750[c] <=> 24 S_cpd00014[c] + S_cpd15759[c]	(CAETHG_RS06265)	CAETHG_RS06265		Teichoic and lipoteichoic acids biosynthesis	1	-1000	1000	2.4.1.52	24 UDP-glucose + Anteisoheptadecanoyllipoteichoic acid (n-24), linked, unsubstituted <=> 24 UDP + Anteisoheptadecanoyllipoteichoic acid (n-24), linked, glucose substituted		0	0	0	0	0	0	0	0	0	0	0	0	0	0	0	0	0	0	0	0	0	0	0	0	0	0	0	0	0	0	0	0	0	0	0	0	0
rxn10311_c0	anteisoheptadecanoyl-lipoteichoic acid synthesis (n-24), linked, N-acetylglucosamine substituted c0	24 S_cpd00037[c] + S_cpd15750[c] <=> 24 S_cpd00014[c] + S_cpd15768[c]	(CAETHG_RS11510)	CAETHG_RS11510		Teichoic and lipoteichoic acids biosynthesis|Methicillin resistance in Staphylococci|Teichuronic acid biosynthesis	1	-1000	1000	2.7.8.-	24 UDP-N-acetylglucosamine + Anteisoheptadecanoyllipoteichoic acid (n-24), linked, unsubstituted <=> 24 UDP + Anteisoheptadecanoyllipoteichoic acid (n-24), linked, N-acetyl-D-glucosamine		0	0	0	0	0	0	0	0	0	0	0	0	0	0	0	0	0	0	0	0	0	0	0	0	0	0	0	0	0	0	0	0	0	0	0	0	0
rxn01486_c0	trans,trans-Farnesyl-diphosphate:isopentenyl-diphosphate c0	S_cpd00113[c] + S_cpd00350[c] -> S_cpd00012[c] + S_cpd00289[c]	((CAETHG_RS15870) or (CAETHG_RS09090) or (CAETHG_RS09090))	CAETHG_RS09090 CAETHG_RS15870		Archaeal lipids|Carotenoids|Polyprenyl Diphosphate Biosynthesis	0	0	1000	2.5.1.29	Isopentenyldiphosphate + Farnesyldiphosphate -> PPi + Geranylgeranyl diphosphate		0	0	0	0	0	0	0	0	0	0	0	0	0	0	0	0	0	0	0	0	0	0	0	0	0	0	0	0	0	0	0	0	0	0	0	0	0
rxn05359_c0	4-methyl-3-oxo-hexanoyl-ACP:malonyl-[acyl-carrier-protein] C-acyltransferase (decarboxylating) c0	S_cpd00067[c] + S_cpd11492[c] + S_cpd11495[c] -> S_cpd00011[c] + S_cpd11493[c] + S_cpd11496[c]	((CAETHG_RS10005) and (CAETHG_RS09985))	CAETHG_RS09985 CAETHG_RS10005		Fatty Acid Biosynthesis FASII	0	0	1000	2.3.1.0	H+ + Malonyl-acyl-carrierprotein + 2-methylbutyryl-ACP -> CO2 + ACP + 4-methyl-3-oxo-hexanoyl-ACP		0	0	0	0	0	0	0	0	0	0	0	0	0	0	0	0	0	0	0	0	0	0	0	0	0	0	0	0	0	0	0	0	0	0	0	0	0
rxn00898_c0	2,3-Dihydroxy-3-methylbutanoate hydro-lyase c0	S_cpd02498[c] -> S_cpd00001[c] + S_cpd00123[c]	((CAETHG_RS10675) or (CAETHG_RS00585))	CAETHG_RS00585 CAETHG_RS10675		Valine biosynthesis	0	0	1000	4.2.1.9	2,3-Dihydroxy-isovalerate -> H2O + 3-Methyl-2-oxobutanoate		0.10568	0.1153	0.13032	0.117493	0.117198	0.00878266	0.126613	0.102413	0.15254	0.108993	0.12264	0.0193984	0.0166234	0.0170289	0.0168262	0.000202725	0.0170289	0.0166234	0.0168262	0.000202725	0.11934	0.0166234	0.0867294	0.0742311	0.0428552	0.116093	0.0546484	0.0176984	0.0300174	0.0546143	0.0379059	0.093453	0.136798	0.115126	0.0216727	0.0534538	0.0515847
rxn10203_c0	myristoyl-glycerol-3-phosphate O-acyltransferase c0	S_cpd00080[c] + S_cpd01695[c] -> S_cpd00010[c] + S_cpd15331[c]	(() and (CAETHG_RS16510))	CAETHG_RS16510		Glycerolipid and Glycerophospholipid Metabolism in Bacteria	0	0	1000	2.3.1.15	Glycerol-3-phosphate + Myristoyl-CoA -> CoA + 1-tetradecanoyl-sn-glycerol 3-phosphate		0	0	0	0	0	0	0	0	0	0	0	0	0	0	0	0	0	0	0	0	0	0	0	0	0	0	0	0	0	0	0	0	0	0	0	0	0
rxn01069_c0	O-Phospho-L-homoserine phospho-lyase (adding water) c0	S_cpd00001[c] + S_cpd00809[c] -> S_cpd00009[c] + S_cpd00067[c] + S_cpd00161[c]	((CAETHG_RS09115) or (CAETHG_RS05835))	CAETHG_RS05835 CAETHG_RS09115		Threonine biosynthesis	0	0	1000	4.2.3.1	H2O + O-Phospho-L-homoserine -> Phosphate + H+ + L-Threonine		0.0301686	0.0301686	0.0301686	0.0309044	0.0303525	0.000318619	0.0309044	0.0309044	0.0301686	0.0309044	0.0307205	0.000318619	0.0301686	0.0309044	0.0305365	0.00036791	0.0309044	0.0301686	0.0305365	0.00036791	0.0301686	0.0301686	0.0301686	0.0301686	8.64009e-14	0.0309044	0.0309044	0.0309044	0.0316402	0.0310884	0.000318619	0.0309044	0.0309044	0.0309044	1.42109e-14	0.0147164	0.0144221
rxn02113_c0	2-Acetolactate carboxy-lyase c0	S_cpd00067[c] + S_cpd00668[c] -> S_cpd00011[c] + S_cpd00361[c]	(CAETHG_RS14410)	CAETHG_RS14410		Butanediol Pathway	0	0	1000	4.1.1.5	H+ + ALCTT -> CO2 + ACTN		0	0	0	0	0	0	0.06	0.06	0.07	0.07	0.065	0.005	0	0	0	0	0.09	0.09	0.09	0	0	0	0	0	0	0	0	0	0	0	0	0	0	0	0	0	0
rxn01997_c0	dTDPglucose 4,6-hydro-lyase c0	S_cpd00626[c] -> S_cpd00001[c] + S_cpd00521[c]	((CAETHG_RS12865) or (CAETHG_RS12965))	CAETHG_RS12865 CAETHG_RS12965		dTDP-L-rhamnoase synthesis	0	0	1000	4.2.1.46	dTDPglucose -> H2O + dTDP-4-oxo-6-deoxy-D-glucose		0	0	0	0	0	0	0	0	0	0	0	0	0	0	0	0	0	0	0	0	0	0	0	0	0	0	0	0	0	0	0	0	0	0	0	0	0
rxn00555_c0	L-Glutamine:D-fructose-6-phosphate aminotransferase (hexose c0	S_cpd00053[c] + S_cpd00072[c] <=> S_cpd00023[c] + S_cpd00288[c]	(CAETHG_RS09130)	CAETHG_RS09130		UDP-N-acetylmuramate biosynthesis	1	-1000	1000	2.6.1.16	L-Glutamine + D-fructose-6-phosphate <=> L-Glutamate + D-Glucosamine phosphate		0.00974325	0.00974325	0.00974325	0.00998089	0.00980266	0.000102901	0.00998089	0.00998089	0.00974325	0.00998089	0.00992148	0.000102901	0.00974325	0.00998089	0.00986207	0.00011882	0.00998089	0.00974325	0.00986207	0.00011882	0.00974325	0.00974325	0.00974325	0.00974325	0	0.00998089	0.00998089	0.00998089	0.0102185	0.0100403	0.000102901	0.00998089	0.00998089	0.00998089	0	0.0047528	0.00465775
rxn05541_c0	Dipeptide transport via ABC system (ala-glu) c0	S_cpd00001[c] + S_cpd00002[c] + S_cpd11586[e] -> S_cpd00008[c] + S_cpd00009[c] + S_cpd00067[c] + S_cpd11586[c]	(CAETHG_RS07520)	CAETHG_RS07520		ABC transporter dipeptide (TC 3.A.1.5.2)	0	0	1000		H2O + ATP + ala-L-glu-L -> ADP + Phosphate + H+ + ala-L-glu-L		0	0	0	0	0	0	0	0	0	0	0	0	0	0	0	0	0	0	0	0	0	0	0	0	0	0	0	0	0	0	0	0	0	0	0	0	0
rxn08298_c0	diacylglycerol kinase (n-C16:1) c0	S_cpd00002[c] + S_cpd15310[c] <=> S_cpd00008[c] + S_cpd15525[c]	(CAETHG_RS14270)	CAETHG_RS14270		Glycerolipid and Glycerophospholipid Metabolism in Bacteria	1	-1000	1000	2.7.1.107	ATP + 1,2-Diacyl-sn-glycerol dihexadec-9-enoyl <=> ADP + 1,2-dihexadec-9-enoyl-sn-glycerol 3-phosphate		0	0	0	0	0	0	0	0	0	0	0	0	0	0	0	0	0	0	0	0	0	0	0	0	0	0	0	0	0	0	0	0	0	0	0	0	0
rxn00260_c0	L-Aspartate:2-oxoglutarate aminotransferase c0	S_cpd00024[c] + S_cpd00041[c] <=> S_cpd00023[c] + S_cpd00032[c]	((CAETHG_RS05435) or (CAETHG_RS06185) or (CAETHG_RS16780) or (CAETHG_RS04450) or (CAETHG_RS01020) or (CAETHG_RS14650) or (CAETHG_RS00180) or (CAETHG_RS19100) or (CAETHG_RS12490) or (CAETHG_RS08900))	CAETHG_RS00180 CAETHG_RS01020 CAETHG_RS04450 CAETHG_RS05435 CAETHG_RS06185 CAETHG_RS08900 CAETHG_RS12490 CAETHG_RS14650 CAETHG_RS16780 CAETHG_RS19100		Aspartate and Glutamate metabolism	1	-1000	1000	2.6.1.1	2-Oxoglutarate + L-Aspartate <=> L-Glutamate + Oxaloacetate		-0.0856094	-0.0856094	-0.0856094	-0.0876974	-0.0861314	0.000904145	-0.0876974	-0.0876974	-0.0856094	-0.0876974	-0.0871754	0.000904145	-0.0856094	-0.0876974	-0.0866534	0.00104402	-0.0876974	-0.0856094	-0.0866534	0.00104402	-0.0856094	-0.0856094	-0.0856094	-0.0856094	2.67962e-13	-0.0876974	-0.0876974	-0.0876974	-0.0897855	-0.0882194	0.000904145	-0.0876974	-0.0876974	-0.0876974	5.68434e-14	-0.0417607	-0.0409255
rxn05219_c0	L-Methionine ABC transport c0	S_cpd00001[c] + S_cpd00002[c] + S_cpd00060[e] -> S_cpd00008[c] + S_cpd00009[c] + S_cpd00060[c] + S_cpd00067[c]	(((CAETHG_RS13380) or (CAETHG_RS05455)) and ((CAETHG_RS13375) or (CAETHG_RS12470)) and ())	CAETHG_RS05455 CAETHG_RS12470 CAETHG_RS13375 CAETHG_RS13380		Transport Reactions	0	0	1000	ABC	H2O + ATP + L-Methionine -> ADP + Phosphate + L-Methionine + H+		0	0	0	0	0	0	0	0	0	0	0	0	0	0	0	0	0	0	0	0	0	0	0	0	0	0	0	0	0	0	0	0	0	0	0	0	0
rxn02484_c0	ATP:4-amino-5-hydroxymethyl-2-methylpyrimidine 5-phosphotransferase c0	S_cpd00002[c] + S_cpd00939[c] <=> S_cpd00008[c] + S_cpd02775[c]	(CAETHG_RS05765)	CAETHG_RS05765		Thiamin biosynthesis	1	-1000	1000	2.7.1.49	ATP + Toxopyrimidine <=> ADP + 4-Amino-5-phosphomethyl-2-methylpyrimidine		0	0	0	0	0	0	0	0	0	0	0	0	0	0	0	0	0	0	0	0	0	0	0	0	0	0	0	0	0	0	0	0	0	0	0	0	0
rxn05337_c0	(3R)-3-Hydroxyhexanoyl-[acyl-carrier-protein]:NADP+ oxidoreductase c0	S_cpd00006[c] + S_cpd11479[c] <=> S_cpd00005[c] + S_cpd00067[c] + S_cpd11486[c]	((CAETHG_RS08435) or (CAETHG_RS00375) or (CAETHG_RS00860) or (CAETHG_RS04365) or (CAETHG_RS06705) or (CAETHG_RS03500) or (CAETHG_RS04680) or (CAETHG_RS09990))	CAETHG_RS00375 CAETHG_RS00860 CAETHG_RS03500 CAETHG_RS04365 CAETHG_RS04680 CAETHG_RS06705 CAETHG_RS08435 CAETHG_RS09990		mycolic acid synthesis|Fatty Acid Biosynthesis FASII	1	-1000	1000		NADP + D-3-Hydroxyhexanoyl-[acp] <=> NADPH + H+ + 3-Oxohexanoyl-[acp]		0	0	0	0	0	0	0	0	0	0	0	0	0	0	0	0	0	0	0	0	0	0	0	0	0	0	0	0	0	0	0	0	0	0	0	0	0
rxn03137_c0	10-Formyltetrahydrofolate:5'-phosphoribosyl-5-amino-4- c0	S_cpd00201[c] + S_cpd02851[c] <=> S_cpd00087[c] + S_cpd02884[c]	(((CAETHG_RS01505) or (CAETHG_RS14515)) and ((CAETHG_RS01505) or (CAETHG_RS14515)))	CAETHG_RS01505 CAETHG_RS14515		De Novo Purine Biosynthesis	1	-1000	1000	2.1.2.3	10-Formyltetrahydrofolate + AICAR <=> Tetrahydrofolate + FAICAR		0.00959997	0.00959997	0.00959997	0.00983411	0.0096585	0.000101388	0.00983411	0.00983411	0.00959997	0.00983411	0.00977558	0.000101388	0.00959997	0.00983411	0.00971704	0.000117073	0.00983411	0.00959997	0.00971704	0.000117073	0.00959997	0.00959997	0.00959997	0.00959997	1.07185e-13	0.00983411	0.00983411	0.00983411	0.0100683	0.00989265	0.000101388	0.00983411	0.00983411	0.00983411	5.68434e-14	0.00468291	0.00458925
rxn00690_c0	Formate:tetrahydrofolate ligase (ADP-forming) c0	S_cpd00002[c] + S_cpd00047[c] + S_cpd00087[c] -> S_cpd00008[c] + S_cpd00009[c] + S_cpd00201[c]	(CAETHG_RS07850)	CAETHG_RS07850		Wood-Ljungdahl Pathway	0	0	1000	6.3.4.3	ATP + Formate + Tetrahydrofolate -> ADP + Phosphate + 10-Formyltetrahydrofolate		4.99324	4.93248	4.63252	5.0674	4.90641	0.165191	6.43564	6.47724	6.54696	6.2204	6.42006	0.121943	8.21723	7.75659	7.98691	0.230317	8.71603	8.41436	8.56519	0.150833	10.3406	10.2513	10.6708	10.4209	0.180416	10.2946	9.79085	11.1024	10.3087	10.3741	0.469361	21.2493	24.9398	23.0945	1.84522	9.85758	10.2896
rxn01114_c0	ATP:D-ribulose 5-phosphotransferase c0	S_cpd00002[c] + S_cpd00258[c] <=> S_cpd00008[c] + S_cpd00171[c]	(CAETHG_RS10975)	CAETHG_RS10975		L-Arabinose utilisation	1	-1000	1000	2.7.1.16,2.7.1.47	ATP + D-Ribulose <=> ADP + D-Ribulose5-phosphate		0	0	0	0	0	0	0	0	0	0	0	0	0	0	0	0	0	0	0	0	0	0	0	0	0	0	0	0	0	0	0	0	0	0	0	0	0
rxn05367_c0	6-methyl-octanoyl-ACP:malonyl-[acyl-carrier-protein] C-acyltransferase (decarboxylating) c0	S_cpd00067[c] + S_cpd11492[c] + S_cpd11503[c] -> S_cpd00011[c] + S_cpd11493[c] + S_cpd11504[c]	((CAETHG_RS10005) and (CAETHG_RS09985))	CAETHG_RS09985 CAETHG_RS10005		Fatty Acid Biosynthesis FASII	0	0	1000	2.3.1.0	H+ + Malonyl-acyl-carrierprotein + 6-methyl-octanoyl-ACP -> CO2 + ACP + 8-methyl-3-oxo-decanoyl-ACP		0	0	0	0	0	0	0	0	0	0	0	0	0	0	0	0	0	0	0	0	0	0	0	0	0	0	0	0	0	0	0	0	0	0	0	0	0
rxn00527_c0	L-Tyrosine:2-oxoglutarate aminotransferase c0	S_cpd00024[c] + S_cpd00069[c] <=> S_cpd00023[c] + S_cpd00868[c]	((CAETHG_RS12490) or ((CAETHG_RS16020) and ()))	CAETHG_RS12490 CAETHG_RS16020		Phenylalanine and Tyrosine Synthesis	1	-1000	1000	2.6.1.5/2.6.1.57	2-Oxoglutarate + L-Tyrosine <=> L-Glutamate + p-hydroxyphenylpyruvate		-0.00169918	-0.00169918	-0.00169918	-0.00174063	-0.00170954	1.79455e-05	-0.00174063	-0.00174063	-0.00169918	-0.00174063	-0.00173026	1.79455e-05	-0.00169918	-0.00174063	-0.0017199	2.07217e-05	-0.00174063	-0.00169918	-0.0017199	2.07217e-05	-0.00169918	-0.00169918	-0.00169918	-0.00169918	0	-0.00174063	-0.00174063	-0.00174063	-0.00178207	-0.00175099	1.79455e-05	-0.00174063	-0.00174063	-0.00174063	0	-0.000828869	-0.000812292
rxn05171_c0	Nitrate-ABC transport c0	S_cpd00001[c] + S_cpd00002[c] + S_cpd00209[e] -> S_cpd00008[c] + S_cpd00009[c] + S_cpd00067[c] + S_cpd00209[c]	(CAETHG_RS03475)	CAETHG_RS03475		Alkanesulfonate assimilation	0	0	1000		H2O + ATP + Nitrate -> ADP + Phosphate + H+ + Nitrate		0	0	0	0	0	0	0	0	0	0	0	0	0	0	0	0	0	0	0	0	0	0	0	0	0	0	0	0	0	0	0	0	0	0	0	0	0
rxn04052_c0	precorrin-8X methylmutase c0	S_cpd08375[c] <=> S_cpd03421[c]	(CAETHG_RS05370)	CAETHG_RS05370		Cobalamin synthesis|Coenzyme B12 biosynthesis	1	-1000	1000	5.4.1.2	Cobalt-precorrin 8 <=> Cobyrinate		0	0	0	0	0	0	0	0	0	0	0	0	0	0	0	0	0	0	0	0	0	0	0	0	0	0	0	0	0	0	0	0	0	0	0	0	0
rxn08549_c0	glycerol-3-phosphate acyltransferase (C16:0) c0	S_cpd00080[c] + S_cpd15277[c] -> S_cpd11493[c] + S_cpd15327[c]	(() and (CAETHG_RS16510))	CAETHG_RS16510		Glycerolipid and Glycerophospholipid Metabolism in Bacteria	0	0	1000	2.3.1.15	Glycerol-3-phosphate + Palmitoyl-ACP -> ACP + 1-hexadecanoyl-sn-glycerol 3-phosphate		0	0	0	0	0	0	0	0	0	0	0	0	0	0	0	0	0	0	0	0	0	0	0	0	0	0	0	0	0	0	0	0	0	0	0	0	0
rxn04045_c0	sirohydrochlorin cobalt-lyase c0	2 S_cpd00067[c] + S_cpd00149[c] + S_cpd03426[c] <=> S_cpd08368[c]	(CAETHG_RS05330)	CAETHG_RS05330		Cobalamin synthesis|Coenzyme B12 biosynthesis	1	-1000	1000	4.99.1.3	2 H+ + Co2+ + Sirohydrochlorin <=> Cobalt-precorrin 2		0	0	0	0	0	0	0	0	0	0	0	0	0	0	0	0	0	0	0	0	0	0	0	0	0	0	0	0	0	0	0	0	0	0	0	0	0
rxn01390_c0	ATP:L-rhamnulose 1-phosphotransferase c0	S_cpd00002[c] + S_cpd00261[c] <=> S_cpd00008[c] + S_cpd03861[c]	(CAETHG_RS10205)	CAETHG_RS10205		Rhamnose Degradation	1	-1000	1000	2.7.1.5	ATP + L-Lyxulose <=> ADP + L-Xylulose 1-phosphate		0	0	0	0	0	0	0	0	0	0	0	0	0	0	0	0	0	0	0	0	0	0	0	0	0	0	0	0	0	0	0	0	0	0	0	0	0
rxn09111_c0	Phosphatidylglycerol synthase (n-C16:0) c0	S_cpd00080[c] + S_cpd15419[c] <=> S_cpd00046[c] + S_cpd15545[c]	((CAETHG_RS16745) or (CAETHG_RS06675))	CAETHG_RS06675 CAETHG_RS16745		Glycerolipid and Glycerophospholipid Metabolism in Bacteria	1	-1000	1000	2.7.8.5	Glycerol-3-phosphate + CDP-1,2-dihexadecanoylglycerol <=> CMP + Phosphatidylglycerophosphate dihexadecanoyl		0	0	0	0	0	0	0	0	0	0	0	0	0	0	0	0	0	0	0	0	0	0	0	0	0	0	0	0	0	0	0	0	0	0	0	0	0
rxn01974_c0	LL-2,6-Diaminoheptanedioate 2-epimerase c0	S_cpd00504[c] <=> S_cpd00516[c]	(CAETHG_RS15555)	CAETHG_RS15555		Lysine metabolism	1	-1000	1000	5.1.1.7	LL-2,6-Diaminopimelate <=> meso-2,6-Diaminopimelate		0.018187	0.018187	0.018187	0.0186306	0.0182979	0.000192078	0.0186306	0.0186306	0.018187	0.0186306	0.0185197	0.000192078	0.018187	0.0186306	0.0184088	0.000221792	0.0186306	0.018187	0.0184088	0.000221792	0.018187	0.018187	0.018187	0.018187	0	0.0186306	0.0186306	0.0186306	0.0190741	0.0187415	0.000192078	0.0186306	0.0186306	0.0186306	0	0.00887169	0.00869426
rxn12645_c0	aminopeptidase c0	S_cpd00001[c] + S_cpd11581[c] <=> S_cpd00033[c] + S_cpd00132[c]	(((CAETHG_RS04585) or (CAETHG_RS15660)) or (CAETHG_RS03545) or (CAETHG_RS07155))	CAETHG_RS03545 CAETHG_RS04585 CAETHG_RS07155 CAETHG_RS15660		Recycling of Peptidoglycan Amino Acids|Protein degradation	1	-1000	1000		H2O + gly-asn-L <=> Glycine + L-Asparagine		0	0	0	0	0	0	0	0	0	0	0	0	0	0	0	0	0	0	0	0	0	0	0	0	0	0	0	0	0	0	0	0	0	0	0	0	0
rxn02008_c0	UDP-N-acetylmuramoyl-L-alanine:D-glutamate ligase(ADP-forming) c0	S_cpd00002[c] + S_cpd00186[c] + S_cpd00890[c] -> S_cpd00008[c] + S_cpd00009[c] + S_cpd00067[c] + S_cpd00525[c]	(CAETHG_RS09645)	CAETHG_RS09645		Peptidoglycan Biosynthesis|Peptidoglycan Biosynthesis 2	0	0	1000	6.3.2.9	ATP + D-Glutamate + UDP-N-acetylmuramoyl-L-alanine -> ADP + Phosphate + H+ + UDP-N-acetylmuramoyl-L-alanyl-D-glutamate		0	0	0	0	0	0	0	0	0	0	0	0	0	0	0	0	0	0	0	0	0	0	0	0	0	0	0	0	0	0	0	0	0	0	0	0	0
rxn05385_c0	5-methyl-3-oxo-hexanoyl-ACP:NADP+ oxidoreductase c0	S_cpd00005[c] + S_cpd00067[c] + S_cpd11521[c] <=> S_cpd00006[c] + S_cpd11522[c]	((CAETHG_RS08435) or (CAETHG_RS00375) or (CAETHG_RS00860) or (CAETHG_RS04365) or (CAETHG_RS06705) or (CAETHG_RS03500) or (CAETHG_RS04680) or (CAETHG_RS09990))	CAETHG_RS00375 CAETHG_RS00860 CAETHG_RS03500 CAETHG_RS04365 CAETHG_RS04680 CAETHG_RS06705 CAETHG_RS08435 CAETHG_RS09990		mycolic acid synthesis|Fatty Acid Biosynthesis FASII	1	-1000	1000	1.1.1.0	NADPH + H+ + 5-methyl-3-oxo-hexanoyl-ACP <=> NADP + 5-methyl-3-hydroxy-hexanoyl-ACP		0	0	0	0	0	0	0	0	0	0	0	0	0	0	0	0	0	0	0	0	0	0	0	0	0	0	0	0	0	0	0	0	0	0	0	0	0
rxn02155_c0	ATP:nicotinamide-nucleotide adenylyltransferase c0	S_cpd00002[c] + S_cpd00873[c] <=> S_cpd00012[c] + S_cpd00638[c]	(CAETHG_RS13930)	CAETHG_RS13930		NAD and NADP cofactor biosynthesis global|NAD regulation	1	-1000	1000	2.7.7.1,2.7.7.18	ATP + Nicotinate ribonucleotide <=> PPi + Deamido-NAD		3.6328e-05	3.6328e-05	3.6328e-05	3.72141e-05	3.65496e-05	3.83671e-07	3.72141e-05	3.72141e-05	3.6328e-05	3.72141e-05	3.69926e-05	3.83671e-07	3.6328e-05	3.72141e-05	3.67711e-05	4.43025e-07	3.72141e-05	3.6328e-05	3.67711e-05	4.43025e-07	3.6328e-05	3.6328e-05	3.6328e-05	3.6328e-05	0	3.72141e-05	3.72141e-05	3.72141e-05	3.81002e-05	3.74356e-05	3.83671e-07	3.72141e-05	3.72141e-05	3.72141e-05	0	1.7721e-05	1.73666e-05
rxn00915_c0	GMP:pyrophosphate phosphoribosyltransferase c0	S_cpd00103[c] + S_cpd00207[c] -> S_cpd00012[c] + S_cpd00126[c]	((CAETHG_RS06200) or (CAETHG_RS09690))	CAETHG_RS06200 CAETHG_RS09690		Purine conversions	0	0	1000	2.4.2.7,2.4.2.8,2.4.2.22	PRPP + Guanine -> PPi + GMP		0	0	0	0	0	0	0	0	0	0	0	0	0	0	0	0	0	0	0	0	0	0	0	0	0	0	0	0	0	0	0	0	0	0	0	0	0
rxn00299_c0	GTP 7,8-8,9-dihydrolase c0	S_cpd00001[c] + S_cpd00038[c] -> S_cpd00047[c] + S_cpd00067[c] + S_cpd02978[c]	(CAETHG_RS13405)	CAETHG_RS13405		Pterin metabolism|Methanopterin biosynthesis2|tRNA modification Archaea Henri|Folate Biosynthesis|Queuosine-Archaeosine Biosynthesis|Folate Biosynthesis (Phoenix Copy)|Zinc regulated enzymes|Pterin metabolism 3	0	0	1000	3.5.4.16	H2O + GTP -> Formate + H+ + 7,8-Dihydroneopterin 3-triphosphate		3.6531e-05	3.6531e-05	3.6531e-05	3.7422e-05	3.67538e-05	3.85814e-07	3.7422e-05	3.7422e-05	3.6531e-05	3.7422e-05	3.71993e-05	3.85814e-07	3.6531e-05	3.7422e-05	3.69765e-05	4.455e-07	3.7422e-05	3.6531e-05	3.69765e-05	4.455e-07	3.6531e-05	3.6531e-05	3.6531e-05	3.6531e-05	0	3.7422e-05	3.7422e-05	3.7422e-05	3.8313e-05	3.76447e-05	3.85814e-07	3.7422e-05	3.7422e-05	3.7422e-05	0	1.782e-05	1.74636e-05
rxn00461_c0	Phosphoenolpyruvate:UDP-N-acetyl-D-glucosamine c0	S_cpd00037[c] + S_cpd00061[c] <=> S_cpd00009[c] + S_cpd00067[c] + S_cpd02820[c]	((CAETHG_RS09905) or (CAETHG_RS11570))	CAETHG_RS09905 CAETHG_RS11570		Peptidoglycan Biosynthesis|UDP-N-acetylmuramate from Fructose-6-phosphate Biosynthesis|Peptidoglycan Biosynthesis 2	1	-1000	1000	2.5.1.7	UDP-N-acetylglucosamine + Phosphoenolpyruvate <=> Phosphate + H+ + UDP-N-acetylglucosamine enolpyruvate		0.00457914	0.00457914	0.00457914	0.00469083	0.00460706	4.83616e-05	0.00469083	0.00469083	0.00457914	0.00469083	0.00466291	4.83616e-05	0.00457914	0.00469083	0.00463499	5.58432e-05	0.00469083	0.00457914	0.00463499	5.58432e-05	0.00457914	0.00457914	0.00457914	0.00457914	0	0.00469083	0.00469083	0.00469083	0.00480252	0.00471875	4.83616e-05	0.00469083	0.00469083	0.00469083	0	0.00223373	0.00218905
rxn00748_c0	Glycerone-phosphate phospho-lyase c0	S_cpd00095[c] -> S_cpd00009[c] + S_cpd00067[c] + S_cpd00428[c]	(CAETHG_RS13880)	CAETHG_RS13880		Methylglyoxal Metabolism|Glutathione: Non-redox reactions	0	0	1000	4.2.3.3	Glycerone-phosphate -> Phosphate + H+ + 2-Oxopropanal		0	0	0	0	0	0	0	0	0	0	0	0	0	0	0	0	0	0	0	0	0	0	0	0	0	0	0	0	0	0	0	0	0	0	0	0	0
rxn06799_c0	S-Adenosyl-L-methionine:DNA (cytosine-5-)-methyltransferase c0	S_cpd00017[c] + S_cpd11763[c] -> S_cpd00019[c] + S_cpd00067[c] + S_cpd12223[c]	(CAETHG_RS02375)	CAETHG_RS02375		Methionine Biosynthesis	0	0	1000	2.1.1.37	S-Adenosyl-L-methionine + DNA cytosine -> S-Adenosyl-homocysteine + H+ + DNA 5-methylcytosine		0	0	0	0	0	0	0	0	0	0	0	0	0	0	0	0	0	0	0	0	0	0	0	0	0	0	0	0	0	0	0	0	0	0	0	0	0
rxn08089_c0	1-octadec-7-enoyl-sn-glycerol 3-phosphate O-acyltransferase (n-C18:1) c0	S_cpd11825[c] + S_cpd15328[c] -> S_cpd11493[c] + S_cpd15527[c]	((CAETHG_RS13530) or (CAETHG_RS08580))	CAETHG_RS08580 CAETHG_RS13530		Phosphate metabolism|Glycerolipid and Glycerophospholipid Metabolism in Bacteria	0	0	1000	2.3.1.51	Octadecenoyl-ACP + 1-octadec-11-enoyl-sn-glycerol 3-phosphate -> ACP + 1,2-dioctadec-11-enoyl-sn-glycerol 3-phosphate		0	0	0	0	0	0	0	0	0	0	0	0	0	0	0	0	0	0	0	0	0	0	0	0	0	0	0	0	0	0	0	0	0	0	0	0	0
rxn00283_c0	L-Alanine racemase c0	S_cpd00035[c] <=> S_cpd00117[c]	(CAETHG_RS05465)	CAETHG_RS05465		Alanine metabolism	1	-1000	1000	5.1.1.1	L-Alanine <=> D-Alanine		-0.00457914	-0.00457914	-0.00457914	-0.00469083	-0.00460706	4.83616e-05	-0.00469083	-0.00469083	-0.00457914	-0.00469083	-0.00466291	4.83616e-05	-0.00457914	-0.00469083	-0.00463499	5.58432e-05	-0.00469083	-0.00457914	-0.00463499	5.58432e-05	-0.00457914	-0.00457914	-0.00457914	-0.00457914	0	-0.00469083	-0.00469083	-0.00469083	-0.00480252	-0.00471875	4.83616e-05	-0.00469083	-0.00469083	-0.00469083	0	-0.00223373	-0.00218905
rxn10212_c0	myristoyl-1-acylglycerol-3-phosphate O-acyltransferase c0	S_cpd01695[c] + S_cpd15331[c] -> S_cpd00010[c] + S_cpd15522[c]	((CAETHG_RS13530) or (CAETHG_RS08580))	CAETHG_RS08580 CAETHG_RS13530		Phosphate metabolism|Glycerolipid and Glycerophospholipid Metabolism in Bacteria	0	0	1000	2.3.1.51	Myristoyl-CoA + 1-tetradecanoyl-sn-glycerol 3-phosphate -> CoA + 1,2-ditetradecanoyl-sn-glycerol 3-phosphate		0	0	0	0	0	0	0	0	0	0	0	0	0	0	0	0	0	0	0	0	0	0	0	0	0	0	0	0	0	0	0	0	0	0	0	0	0
rxn00953_c0	L-Serine hydro-lyase (adding homocysteine) c0	S_cpd00054[c] + S_cpd00135[c] <=> S_cpd00001[c] + S_cpd00424[c]	(CAETHG_RS02365)	CAETHG_RS02365		Glycine and Serine utilisation|Methionine Biosynthesis|Cysteine Biosynthesis|Methionine Degradation	1	-1000	1000	4.2.1.22	L-Serine + Homocysteine <=> H2O + Cystathionine		0	0	0	0	0	0	0	0	0	0	0	0	0	0	0	0	0	0	0	0	0	0	0	0	0	0	0	0	0	0	0	0	0	0	0	0	0
rxn10337_c0	isoheptadecanoyl-cardiolipin synthase c0	2 S_cpd15722[c] <=> S_cpd00100[c] + S_cpd15794[c]	((CAETHG_RS14670) or (CAETHG_RS04280))	CAETHG_RS04280 CAETHG_RS14670		Glycerolipid and Glycerophospholipid Metabolism in Bacteria	1	-1000	1000		2 Diisoheptadecanoylphosphatidylglycerol <=> Glycerol + Isoheptadecanoylcardiolipin (B. subtilis)		0	0	0	0	0	0	0	0	0	0	0	0	0	0	0	0	0	0	0	0	0	0	0	0	0	0	0	0	0	0	0	0	0	0	0	0	0
rxn10235_c0	isopentadecanoyl-phosphatidylserine decarboxylase c0	2 S_cpd00067[c] + S_cpd15692[c] <=> S_cpd00011[c] + S_cpd15698[c]	(CAETHG_RS10720)	CAETHG_RS10720		Glycerolipid and Glycerophospholipid Metabolism in Bacteria|Bacterial cyanide production and tolerance mechanisms	1	-1000	1000	4.1.1.65	2 H+ + Diisopentadecanoylphosphatidylserine <=> CO2 + Diisopentadecanoylphosphatidylethanolamine		0	0	0	0	0	0	0	0	0	0	0	0	0	0	0	0	0	0	0	0	0	0	0	0	0	0	0	0	0	0	0	0	0	0	0	0	0
rxn10273_c0	stearoyl-UDP-glucosyltransferase (diglucosyl) c0	S_cpd00026[c] + S_cpd15739[c] <=> S_cpd00014[c] + S_cpd15730[c]	(CAETHG_RS11420)	CAETHG_RS11420		Teichoic and lipoteichoic acids biosynthesis	1	-1000	1000		UDP-glucose + Monoglucosyl-1,2 distearoylglycerol <=> UDP + Diglucosyl-1,2 distearoylglycerol		0	0	0	0	0	0	0	0	0	0	0	0	0	0	0	0	0	0	0	0	0	0	0	0	0	0	0	0	0	0	0	0	0	0	0	0	0
rxn05417_c0	6-methyl-heptanoyl-ACP:malonyl-[acyl-carrier-protein] C-acyltransferase (decarboxylating) c0	S_cpd00067[c] + S_cpd11492[c] + S_cpd11553[c] -> S_cpd00011[c] + S_cpd11493[c] + S_cpd11554[c]	((CAETHG_RS10005) and (CAETHG_RS09985))	CAETHG_RS09985 CAETHG_RS10005		Fatty Acid Biosynthesis FASII	0	0	1000	2.3.1.0	H+ + Malonyl-acyl-carrierprotein + 6-methyl-heptanoyl-ACP -> CO2 + ACP + 8-methyl-3-oxo-nonanoyl-ACP		0	0	0	0	0	0	0	0	0	0	0	0	0	0	0	0	0	0	0	0	0	0	0	0	0	0	0	0	0	0	0	0	0	0	0	0	0
rxn00938_c0	Nicotinamide amidohydrolase c0	S_cpd00001[c] + S_cpd00133[c] -> S_cpd00013[c] + S_cpd00218[c]	(CAETHG_RS01795)	CAETHG_RS01795		cAMP signaling in bacteria|Redox-dependent regulation of nucleus processes|NAD and NADP cofactor biosynthesis global|NAD regulation	0	0	1000	3.5.1.19	H2O + Nicotinamide -> NH3 + Niacin		0	0	0	0	0	0	0	0	0	0	0	0	0	0	0	0	0	0	0	0	0	0	0	0	0	0	0	0	0	0	0	0	0	0	0	0	0
rxn10305_c0	anteisopentadecanoyl-lipoteichoic acid synthesis (n-24), linked, glucose substituted c0	24 S_cpd00026[c] + S_cpd15753[c] <=> 24 S_cpd00014[c] + S_cpd15762[c]	(CAETHG_RS06265)	CAETHG_RS06265		Teichoic and lipoteichoic acids biosynthesis	1	-1000	1000	2.4.1.52	24 UDP-glucose + Anteisopentadecanoyllipoteichoic acid (n-24), linked, unsubstituted <=> 24 UDP + Anteisopentadecanoyllipoteichoic acid (n-24), linked, glucose substituted		0	0	0	0	0	0	0	0	0	0	0	0	0	0	0	0	0	0	0	0	0	0	0	0	0	0	0	0	0	0	0	0	0	0	0	0	0
rxn10221_c0	anteisoheptadecanoyl-phosphatidate cytidylyltransferase c0	S_cpd00052[c] + S_cpd15678[c] <=> S_cpd00012[c] + S_cpd15684[c]	(CAETHG_RS16645)	CAETHG_RS16645		Glycerolipid and Glycerophospholipid Metabolism in Bacteria	1	-1000	1000	2.7.7.41	CTP + 1,2-dianteisoheptadecanoyl-sn-glycerol 3-phosphate <=> PPi + CDP-1,2-dianteisoheptadecanoylglycerol		0	0	0	0	0	0	0	0	0	0	0	0	0	0	0	0	0	0	0	0	0	0	0	0	0	0	0	0	0	0	0	0	0	0	0	0	0
rxn09177_c0	phosphopantothenate-cysteine ligase c0	S_cpd00052[c] + S_cpd00084[c] + S_cpd02201[c] -> S_cpd00012[c] + S_cpd00046[c] + S_cpd02666[c]	(CAETHG_RS16385)	CAETHG_RS16385		Coenzyme A Biosynthesis	0	0	1000	6.3.2.5	CTP + L-Cysteine + 4-phosphopantothenate -> PPi + CMP + (R)-4-Phosphopantothenoyl-L-cysteine		0	0	0	0	0	0	0	0	0	0	0	0	0	0	0	0	0	0	0	0	0	0	0	0	0	0	0	0	0	0	0	0	0	0	0	0	0
rxn03437_c0	(R)-2,3-Dihydroxy-3-methylpentanoate hydro-lyase c0	S_cpd02535[c] -> S_cpd00001[c] + S_cpd00508[c]	((CAETHG_RS10675) or (CAETHG_RS00585))	CAETHG_RS00585 CAETHG_RS10675		Isoleucine Biosynthesis	0	0	1000	4.2.1.9	2,3-Dihydroxy-3-methylvalerate -> H2O + 3MOP		0.00708964	0.00708964	0.00708964	0.00726256	0.00713287	7.48757e-05	0.00726256	0.00726256	0.00708964	0.00726256	0.00721933	7.48757e-05	0.00708964	0.00726256	0.0071761	8.6459e-05	0.00726256	0.00708964	0.0071761	8.6459e-05	0.00708964	0.00708964	0.00708964	0.00708964	0	0.00726256	0.00726256	0.00726256	0.00743548	0.00730579	7.48757e-05	0.00726256	0.00726256	0.00726256	0	0.00345836	0.00338919
rxn09199_c0	Phosphatidylserine decarboxylase (n-C14:1) c0	2 S_cpd00067[c] + S_cpd15554[c] <=> S_cpd00011[c] + S_cpd15530[c]	(CAETHG_RS10720)	CAETHG_RS10720		Glycerolipid and Glycerophospholipid Metabolism in Bacteria|Bacterial cyanide production and tolerance mechanisms	1	-1000	1000	4.1.1.65	2 H+ + phosphatidylserine ditetradec-7-enoyl <=> CO2 + phosphatidylethanolamine ditetradec-7-enoyl		0	0	0	0	0	0	0	0	0	0	0	0	0	0	0	0	0	0	0	0	0	0	0	0	0	0	0	0	0	0	0	0	0	0	0	0	0
rxn02320_c0	5-Amino-2-oxopentanoate:2-oxoglutarate aminotransferase c0	S_cpd00024[c] + S_cpd00807[c] <=> S_cpd00023[c] + S_cpd00930[c]	((CAETHG_RS16020) and ())	CAETHG_RS16020		Histidine Biosynthesis	1	-1000	1000	2.6.1.9	2-Oxoglutarate + L-histidinol-phosphate <=> L-Glutamate + imidazole acetol-phosphate		-0.000822232	-0.000822232	-0.000822232	-0.000842286	-0.000827245	8.68382e-06	-0.000842286	-0.000842286	-0.000822232	-0.000842286	-0.000837272	8.68382e-06	-0.000822232	-0.000842286	-0.000832259	1.00272e-05	-0.000842286	-0.000822232	-0.000832259	1.00272e-05	-0.000822232	-0.000822232	-0.000822232	-0.000822232	0	-0.000842286	-0.000842286	-0.000842286	-0.000862341	-0.0008473	8.68382e-06	-0.000842286	-0.000842286	-0.000842286	0	-0.000401089	-0.000393067
rxn01648_c0	Cytidine:orthophosphate alpha-D-ribosyltransferase c0	S_cpd00009[c] + S_cpd00067[c] + S_cpd00367[c] <=> S_cpd00307[c] + S_cpd00475[c]	(CAETHG_RS19255)	CAETHG_RS19255		Pyrimidine conversions	1	-1000	1000	2.4.2.2	Phosphate + H+ + Cytidine <=> Cytosine + Ribose 1-phosphate		0	0	0	0	0	0	0	0	0	0	0	0	0	0	0	0	0	0	0	0	0	0	0	0	0	0	0	0	0	0	0	0	0	0	0	0	0
rxn10126_c0	succinate dehyrdogenase c0	S_cpd00982[c] + S_cpd15560[c] -> S_cpd00015[c] + S_cpd15561[c]	((CAETHG_RS01630) and (CAETHG_RS01620))	CAETHG_RS01620 CAETHG_RS01630		Succinate dehydrogenase	0	0	1000		FADH2 + Ubiquinone-8 -> FAD + Ubiquinol-8		0	0	0	0	0	0	0	0	0	0	0	0	0	0	0	0	0	0	0	0	0	0	0	0	0	0	0	0	0	0	0	0	0	0	0	0	0
rxn08083_c0	1-tetradecanoyl-sn-glycerol 3-phosphate O-acyltransferase (n-C12:0) c0	S_cpd11468[c] + S_cpd15325[c] -> S_cpd11493[c] + S_cpd15521[c]	((CAETHG_RS13530) or (CAETHG_RS08580))	CAETHG_RS08580 CAETHG_RS13530		Phosphate metabolism|Glycerolipid and Glycerophospholipid Metabolism in Bacteria	0	0	1000	2.3.1.51	Dodecanoyl-ACP + 1-dodecanoyl-sn-glycerol 3-phosphate -> ACP + 1,2-didodecanoyl-sn-glycerol 3-phosphate		0	0	0	0	0	0	0	0	0	0	0	0	0	0	0	0	0	0	0	0	0	0	0	0	0	0	0	0	0	0	0	0	0	0	0	0	0
rxn02507_c0	1-(2-Carboxyphenylamino)-1-deoxy-D-ribulose-5-phosphate c0	S_cpd00067[c] + S_cpd00956[c] -> S_cpd00001[c] + S_cpd00011[c] + S_cpd02210[c]	(CAETHG_RS18190)	CAETHG_RS18190		Tryptophan synthesis	0	0	1000	4.1.1.48	H+ + 1-(2-carboxyphenylamino)-1-deoxyribulose 5-phosphate -> H2O + CO2 + Indoleglycerol phosphate		0.000931569	0.000931569	0.000931569	0.00095429	0.000937249	9.83857e-06	0.00095429	0.00095429	0.000931569	0.00095429	0.00094861	9.83857e-06	0.000931569	0.00095429	0.00094293	1.13606e-05	0.00095429	0.000931569	0.00094293	1.13606e-05	0.000931569	0.000931569	0.000931569	0.000931569	0	0.00095429	0.00095429	0.00095429	0.000977012	0.000959971	9.83857e-06	0.00095429	0.00095429	0.00095429	0	0.000454424	0.000445336
rxn03901_c0	Undecaprenyl-diphosphate phosphohydrolase c0	S_cpd00001[c] + S_cpd02229[c] -> S_cpd00009[c] + S_cpd00067[c] + S_cpd00286[c]	(CAETHG_RS13340)	CAETHG_RS13340		Teichoic and lipoteichoic acids biosynthesis	0	0	1000	3.6.1.27	H2O + Bactoprenyl diphosphate -> Phosphate + H+ + Undecaprenylphosphate		0	0	0	0	0	0	0	0	0	0	0	0	0	0	0	0	0	0	0	0	0	0	0	0	0	0	0	0	0	0	0	0	0	0	0	0	0
rxn03933_c0	UDP-N-acetylglucosamine-N-acetylmuramyl-(pentapeptide)pyrophosphoryl-undecaprenol N-acetylglucosamine transferase c0	S_cpd00037[c] + S_cpd02948[c] <=> S_cpd00014[c] + S_cpd03491[c]	(CAETHG_RS14885)	CAETHG_RS14885		Peptidoglycan Biosynthesis|Peptidoglycan Biosynthesis 2	1	-1000	1000	2.4.1.227	UDP-N-acetylglucosamine + MurAc(oyl-L-Ala-D-gamma-Glu-L-Lys-D-Ala-D-Ala)-diphospho- undecaprenol <=> UDP + Undecaprenyl-diphospho-N-acetylmuramoyl-(N-acetylglucosamine)-L-alanyl-gamma-D-glutamyl-L-lysyl-D-alanyl-D-alanine		0	0	0	0	0	0	0	0	0	0	0	0	0	0	0	0	0	0	0	0	0	0	0	0	0	0	0	0	0	0	0	0	0	0	0	0	0
rxn05202_c0	Xanthine ion-coupled transport c0	S_cpd00067[e] + S_cpd00309[e] <=> S_cpd00067[c] + S_cpd00309[c]	(CAETHG_RS02145)	CAETHG_RS02145		Purine utilisation	1	-1000	1000		H+ + XAN <=> H+ + XAN		0	0	0	0	0	0	0	0	0	0	0	0	0	0	0	0	0	0	0	0	0	0	0	0	0	0	0	0	0	0	0	0	0	0	0	0	0
rxn05226_c0	Glucose-phosphotransferase (PTS) system c0	S_cpd00027[e] + S_cpd00061[c] <=> S_cpd00020[c] + S_cpd00079[c]	(() and () and () and (CAETHG_RS09185) and ())	CAETHG_RS09185		Trehalose Uptake and utilisation	1	-1000	1000		D-Glucose + Phosphoenolpyruvate <=> Pyruvate + D-glucose-6-phosphate		0	0	0	0	0	0	0	0	0	0	0	0	0	0	0	0	0	0	0	0	0	0	0	0	0	0	0	0	0	0	0	0	0	0	0	0	0
rxn05537_c0	Dipeptide transport via ABC system (gly-asp) c0	S_cpd00001[c] + S_cpd00002[c] + S_cpd11589[e] -> S_cpd00008[c] + S_cpd00009[c] + S_cpd00067[c] + S_cpd11589[c]	(CAETHG_RS07520)	CAETHG_RS07520		ABC transporter dipeptide (TC 3.A.1.5.2)	0	0	1000		H2O + ATP + gly-asp-L -> ADP + Phosphate + H+ + gly-asp-L		0	0	0	0	0	0	0	0	0	0	0	0	0	0	0	0	0	0	0	0	0	0	0	0	0	0	0	0	0	0	0	0	0	0	0	0	0
rxn10209_c0	anteisopentadecanoyl-glycerol-3-phosphate O-acyltransferase c0	S_cpd00080[c] + S_cpd11439[c] -> S_cpd00010[c] + S_cpd15675[c]	(() and (CAETHG_RS16510))	CAETHG_RS16510		Glycerolipid and Glycerophospholipid Metabolism in Bacteria	0	0	1000	2.3.1.15	Glycerol-3-phosphate + fa4coa -> CoA + 1-anteisopentadecanoyl-sn-glycerol 3-phosphate		0	0	0	0	0	0	0	0	0	0	0	0	0	0	0	0	0	0	0	0	0	0	0	0	0	0	0	0	0	0	0	0	0	0	0	0	0
rxn01333_c0	Sedoheptulose-7-phosphate:D-glyceraldehyde-3-phosphate c0	S_cpd00102[c] + S_cpd00238[c] <=> S_cpd00072[c] + S_cpd00236[c]	((CAETHG_RS08760) or (CAETHG_RS03160))	CAETHG_RS03160 CAETHG_RS08760		Pentose Phosphate Pathway	1	-1000	1000	2.2.1.2	Glyceraldehyde3-phosphate + Sedoheptulose7-phosphate <=> D-fructose-6-phosphate + D-Erythrose4-phosphate		-0.00490402	-0.00490402	-0.00490402	-0.00502363	-0.00493392	5.17927e-05	-0.00502363	-0.00502363	-0.00490402	-0.00502363	-0.00499372	5.17927e-05	-0.00490402	-0.00502363	-0.00496382	5.98051e-05	-0.00502363	-0.00490402	-0.00496382	5.98051e-05	-0.00490402	-0.00490402	-0.00490402	-0.00490402	5.35925e-14	-0.00502363	-0.00502363	-0.00502363	-0.00514324	-0.00505353	5.17927e-05	-0.00502363	-0.00502363	-0.00502363	0	-0.0023922	-0.00234436
rxn01626_c0	5,6-Dihydrouracil amidohydrolase c0	S_cpd00001[c] + S_cpd00337[c] -> S_cpd00067[c] + S_cpd01720[c]	((CAETHG_RS07195) or (CAETHG_RS02115))	CAETHG_RS02115 CAETHG_RS07195		Hydantoin metabolism|Pyrimidine utilisation	0	0	1000	3.5.2.2	H2O + Hydrouracil -> H+ + 3-Ureidopropanoate		1.42065e-06	1.42065e-06	1.42065e-06	1.4553e-06	1.42931e-06	1.50039e-08	1.4553e-06	1.4553e-06	1.42065e-06	1.4553e-06	1.44664e-06	1.50039e-08	1.42065e-06	1.4553e-06	1.43798e-06	1.7325e-08	1.4553e-06	1.42065e-06	1.43797e-06	1.7325e-08	1.42065e-06	1.42065e-06	1.42065e-06	1.42065e-06	5.93682e-16	1.4553e-06	1.4553e-06	1.4553e-06	1.48995e-06	1.46396e-06	1.50039e-08	1.4553e-06	1.4553e-06	1.4553e-06	0	6.93e-07	6.7914e-07
rxn05560_c0	D-fructose transport via PEP:Pyr PTS c0	S_cpd00061[c] + S_cpd00082[e] <=> S_cpd00020[c] + S_cpd00802[c]	(() and (CAETHG_RS09185) and () and ((CAETHG_RS00680) or (CAETHG_RS03210)) and ())	CAETHG_RS00680 CAETHG_RS03210 CAETHG_RS09185		Fructose utilisation	1	-1000	1000		Phosphoenolpyruvate + D-Fructose <=> Pyruvate + D-fructose-1-phosphate		-0.0362139	-0.0362139	-0.0362139	-0.0370972	-0.0364347	0.000382465	-0.0370972	-0.0370972	-0.0362139	-0.0370972	-0.0368764	0.000382465	-0.0362139	-0.0370972	-0.0366555	0.000441633	-0.0370972	-0.0362139	-0.0366555	0.000441633	-0.0362139	-0.0362139	-0.0362139	-0.0362139	1.07185e-13	-0.0370972	-0.0370972	-0.0370972	-0.0379804	-0.037318	0.000382465	-0.0370972	-0.0370972	-0.0370972	0	-0.0176653	-0.017312
cpd00082_ext_b		S_cpd00082[e] <=>				Exchange Reactions	1	-1.4	0	Carbon	D-Fructose <=>		0	0	0	0	0	0	0	0	0	0	0	0	0	0	0	0	0	0	0	0	0	0	0	0	0	0	0	0	0	0	0	0	0	0	0	0	0
rxn02161_c0	ATP:L-rhamnulose 1-phosphotransferase c0	S_cpd00002[c] + S_cpd00642[c] <=> S_cpd00008[c] + S_cpd00831[c]	(CAETHG_RS10205)	CAETHG_RS10205		Rhamnose utilisation	1	-1000	1000	2.7.1.5	ATP + L-Rhamnulose <=> ADP + L-Rhamnulose 1-phosphate		0	0	0	0	0	0	0	0	0	0	0	0	0	0	0	0	0	0	0	0	0	0	0	0	0	0	0	0	0	0	0	0	0	0	0	0	0
rxn00714_c0	P1,P4-Bis(5'-nucleosyl)-tetraphosphate nucleotidohydrolase c0	S_cpd00001[c] + S_cpd03706[c] -> S_cpd00062[c] + S_cpd00091[c]	(CAETHG_RS14235)	CAETHG_RS14235		Pyrimidine conversions	0	0	1000	3.6.1.17	H2O + UppppU -> UTP + UMP		0	0	0	0	0	0	0	0	0	0	0	0	0	0	0	0	0	0	0	0	0	0	0	0	0	0	0	0	0	0	0	0	0	0	0	0	0
rxn00303_c0	ATP:GTP 3'-pyrophosphotransferase c0	S_cpd00002[c] + S_cpd00038[c] <=> S_cpd00018[c] + S_cpd02740[c]	((CAETHG_RS06095) or ((CAETHG_RS11705) or (CAETHG_RS05090) or (CAETHG_RS00360)))	CAETHG_RS00360 CAETHG_RS05090 CAETHG_RS06095 CAETHG_RS11705		Stringent Response, (p)ppGpp metabolism	1	-1000	1000	2.7.6.5	ATP + GTP <=> AMP + Guanosine 5-triphosphate,3-diphosphate		0	0	0	0	0	0	0	0	0	0	0	0	0	0	0	0	0	0	0	0	0	0	0	0	0	0	0	0	0	0	0	0	0	0	0	0	0
rxn00693_c0	5-Methyltetrahydrofolate:L-homocysteine S-methyltransferase c0	S_cpd00135[c] + S_cpd00345[c] <=> S_cpd00060[c] + S_cpd00087[c]	((CAETHG_RS13555) or (CAETHG_RS14005) or (CAETHG_RS13980) or (CAETHG_RS00695))	CAETHG_RS00695 CAETHG_RS13555 CAETHG_RS13980 CAETHG_RS14005		Methionine biosynthesis	1	-1000	1000	2.1.1.13	Homocysteine + 5-Methyltetrahydrofolate <=> L-Methionine + Tetrahydrofolate		0.00558607	0.00558607	0.00558607	0.00572232	0.00562013	5.89961e-05	0.00572232	0.00572232	0.00558607	0.00572232	0.00568826	5.89961e-05	0.00558607	0.00572232	0.00565419	6.81228e-05	0.00572232	0.00558607	0.00565419	6.81228e-05	0.00558607	0.00558607	0.00558607	0.00558607	0	0.00572232	0.00572232	0.00572232	0.00585856	0.00575638	5.89961e-05	0.00572232	0.00572232	0.00572232	0	0.00272491	0.00267041
rxn00122_c0	ATP:FMN adenylyltransferase c0	S_cpd00002[c] + S_cpd00050[c] -> S_cpd00012[c] + S_cpd00015[c]	((CAETHG_RS16705) and (CAETHG_RS16705))	CAETHG_RS16705		riboflavin to FAD|Riboflavin, FMN and FAD metabolism	0	0	1000	2.7.7.2	ATP + FMN -> PPi + FAD		1.42065e-06	1.42065e-06	1.42065e-06	1.4553e-06	1.42931e-06	1.50039e-08	1.4553e-06	1.4553e-06	1.42065e-06	1.4553e-06	1.44664e-06	1.50039e-08	1.42065e-06	1.4553e-06	1.43797e-06	1.7325e-08	1.4553e-06	1.42065e-06	1.43797e-06	1.7325e-08	1.42065e-06	1.42065e-06	1.42065e-06	1.42065e-06	2.11758e-22	1.4553e-06	1.4553e-06	1.4553e-06	1.48995e-06	1.46396e-06	1.50039e-08	1.4553e-06	1.4553e-06	1.4553e-06	0	6.93e-07	6.7914e-07
rxn01116_c0	D-Ribulose-5-phosphate 3-epimerase c0	S_cpd00171[c] <=> S_cpd00198[c]	(CAETHG_RS16435)	CAETHG_RS16435		Pentose Phosphate Pathway	1	-1000	1000	5.1.3.1	D-Ribulose5-phosphate <=> D-Xylulose5-phosphate		-0.0155406	-0.0155406	-0.0155406	-0.0159196	-0.0156353	0.000164128	-0.0159196	-0.0159196	-0.0155406	-0.0159196	-0.0158249	0.000164128	-0.0155406	-0.0159196	-0.0157301	0.000189519	-0.0159196	-0.0155406	-0.0157301	0.000189519	-0.0155406	-0.0155406	-0.0155406	-0.0155406	5.35925e-14	-0.0159196	-0.0159196	-0.0159196	-0.0162987	-0.0160144	0.000164128	-0.0159196	-0.0159196	-0.0159196	5.68434e-14	-0.00758077	-0.00742915
rxn00470_c0	L-Ornithine carboxy-lyase c0	S_cpd00064[c] + S_cpd00067[c] -> S_cpd00011[c] + S_cpd00118[c]	(CAETHG_RS06350)	CAETHG_RS06350		Ornithine degradation	0	0	1000	4.1.1.17	Ornithine + H+ -> CO2 + Putrescine		0	0	0	0	0	0	0	0	0	0	0	0	0	0	0	0	0	0	0	0	0	0	0	0	0	0	0	0	0	0	0	0	0	0	0	0	0
rxn05585_c0	hexanesulfonate transport via ABC system c0	S_cpd00001[c] + S_cpd00002[c] + S_cpd11578[e] -> S_cpd00008[c] + S_cpd00009[c] + S_cpd00067[c] + S_cpd11578[c]	(() and ((CAETHG_RS03470) or (CAETHG_RS19320)) and ((CAETHG_RS03465) or (CAETHG_RS19325)))	CAETHG_RS03465 CAETHG_RS03470 CAETHG_RS19320 CAETHG_RS19325		Alkanesulfonate assimilation|Alkanesulfonates utilisation	0	0	1000		H2O + ATP + hexanesulfonate -> ADP + Phosphate + H+ + hexanesulfonate		0	0	0	0	0	0	0	0	0	0	0	0	0	0	0	0	0	0	0	0	0	0	0	0	0	0	0	0	0	0	0	0	0	0	0	0	0
rxn03908_c0	ATP: 4-(Cytidine 5'-diphospho)-2-C-methyl-D-erythritol c0	S_cpd00002[c] + S_cpd08287[c] <=> S_cpd00008[c] + S_cpd08288[c]	(CAETHG_RS11395)	CAETHG_RS11395		Methylerythritol Phosphate Pathway	1	-1000	1000	2.7.1.148	ATP + 4-cytidine5-diphospho-2-C-methyl-D-erythritol <=> ADP + 2-phospho-4-cytidine5-diphospho-2-C-methyl-D-erythritol		0	0	0	0	0	0	0	0	0	0	0	0	0	0	0	0	0	0	0	0	0	0	0	0	0	0	0	0	0	0	0	0	0	0	0	0	0
rxn08551_c0	glycerol-3-phosphate acyltransferase (C18:0) c0	S_cpd00080[c] + S_cpd15268[c] -> S_cpd11493[c] + S_cpd15329[c]	(() and (CAETHG_RS16510))	CAETHG_RS16510		Glycerolipid and Glycerophospholipid Metabolism in Bacteria	0	0	1000	2.3.1.15	Glycerol-3-phosphate + Octadecanoyl-ACP -> ACP + 1-octadecanoyl-sn-glycerol 3-phosphate		0	0	0	0	0	0	0	0	0	0	0	0	0	0	0	0	0	0	0	0	0	0	0	0	0	0	0	0	0	0	0	0	0	0	0	0	0
rxn08308_c0	CDP-diacylglycerol synthetase (n-C14:1) c0	S_cpd00052[c] + S_cpd15523[c] <=> S_cpd00012[c] + S_cpd15422[c]	(CAETHG_RS16645)	CAETHG_RS16645		Glycerolipid and Glycerophospholipid Metabolism in Bacteria	1	-1000	1000	2.7.7.41	CTP + 1,2-ditetradec-7-enoyl-sn-glycerol 3-phosphate <=> PPi + CDP-1,2-ditetradec-7-enoylglycerol		0	0	0	0	0	0	0	0	0	0	0	0	0	0	0	0	0	0	0	0	0	0	0	0	0	0	0	0	0	0	0	0	0	0	0	0	0
rxn01986_c0	2-Deoxy-D-ribose 1-phosphate 1,5-phosphomutase c0	S_cpd00509[c] <=> S_cpd00510[c]	(CAETHG_RS19250)	CAETHG_RS19250		Pentose Phosphate Pathway	1	-1000	1000	5.4.2.7	deoxyribose-1-phosphate <=> deoxyribose-5-phosphate		1.42065e-06	1.42065e-06	1.42065e-06	1.4553e-06	1.42931e-06	1.50039e-08	1.4553e-06	1.4553e-06	1.42065e-06	1.4553e-06	1.44664e-06	1.50039e-08	1.42065e-06	1.4553e-06	1.43798e-06	1.7325e-08	1.4553e-06	1.42065e-06	1.43798e-06	1.7325e-08	1.42065e-06	1.42065e-06	1.42065e-06	1.42065e-06	0	1.4553e-06	1.4553e-06	1.4553e-06	1.48995e-06	1.46396e-06	1.50039e-08	1.4553e-06	1.4553e-06	1.4553e-06	0	6.93e-07	6.7914e-07
rxn05207_c0	Na+/malate symporter c0	S_cpd00130[e] + S_cpd00971[e] <=> S_cpd00130[c] + S_cpd00971[c]	(CAETHG_RS03875)	CAETHG_RS03875		Transport Reactions	1	0	0		L-Malate + Na+ <=> L-Malate + Na+		0	0	0	0	0	0	0	0	0	0	0	0	0	0	0	0	0	0	0	0	0	0	0	0	0	0	0	0	0	0	0	0	0	0	0	0	0
rxn02213_c0	3-Dehydroquinate hydro-lyase c0	S_cpd00699[c] -> S_cpd00001[c] + S_cpd01716[c]	(CAETHG_RS04145)	CAETHG_RS04145		Chorismate synthesis	0	0	1000	4.2.1.10	5-Dehydroquinate -> H2O + 3-Dehydroshikimate		0.00573255	0.00573255	0.00573255	0.00587236	0.0057675	6.05431e-05	0.00587236	0.00587236	0.00573255	0.00587236	0.00583741	6.05431e-05	0.00573255	0.00587236	0.00580246	6.99091e-05	0.00587236	0.00573255	0.00580246	6.99091e-05	0.00573255	0.00573255	0.00573255	0.00573255	0	0.00587236	0.00587236	0.00587236	0.00601218	0.00590732	6.05431e-05	0.00587236	0.00587236	0.00587236	0	0.00279636	0.00274044
rxn02200_c0	2-Amino-4-hydroxy-6-hydroxymethyl-7,8-dihydropteridine:4- c0	S_cpd00443[c] + S_cpd00954[c] <=> S_cpd00001[c] + S_cpd00683[c]	(CAETHG_RS13400)	CAETHG_RS13400		Folate Biosynthesis|Folate Biosynthesis (Phoenix Copy)|YgfZ	1	-1000	1000	2.5.1.15	ABEE + 6-hydroxymethyl dihydropterin <=> H2O + Dihydropteroate		3.6531e-05	3.6531e-05	3.6531e-05	3.7422e-05	3.67537e-05	3.85814e-07	3.7422e-05	3.7422e-05	3.6531e-05	3.7422e-05	3.71992e-05	3.85814e-07	3.6531e-05	3.7422e-05	3.69765e-05	4.455e-07	3.7422e-05	3.6531e-05	3.69765e-05	4.455e-07	3.6531e-05	3.6531e-05	3.6531e-05	3.6531e-05	0	3.7422e-05	3.7422e-05	3.7422e-05	3.8313e-05	3.76447e-05	3.85814e-07	3.7422e-05	3.7422e-05	3.7422e-05	0	1.782e-05	1.74636e-05
rxn05397_c0	11-methyl-3-oxo-dodecanoyl-ACP:NADP+ oxidoreductase c0	S_cpd00005[c] + S_cpd00067[c] + S_cpd11533[c] <=> S_cpd00006[c] + S_cpd11534[c]	((CAETHG_RS08435) or (CAETHG_RS00375) or (CAETHG_RS00860) or (CAETHG_RS04365) or (CAETHG_RS06705) or (CAETHG_RS03500) or (CAETHG_RS04680) or (CAETHG_RS09990))	CAETHG_RS00375 CAETHG_RS00860 CAETHG_RS03500 CAETHG_RS04365 CAETHG_RS04680 CAETHG_RS06705 CAETHG_RS08435 CAETHG_RS09990		mycolic acid synthesis|Fatty Acid Biosynthesis FASII	1	-1000	1000	1.1.1.0	NADPH + H+ + 11-methyl-3-oxo-dodecanoyl-ACP <=> NADP + 11-methyl-3-hydroxy-dodecanoyl-ACP		0	0	0	0	0	0	0	0	0	0	0	0	0	0	0	0	0	0	0	0	0	0	0	0	0	0	0	0	0	0	0	0	0	0	0	0	0
rxn04308_c0	di-trans,poly-cis-Decaprenyl-diphosphate:isopentenyl-diphosphate c0	7 S_cpd00113[c] + S_cpd08211[c] -> 7 S_cpd00012[c] + S_cpd02229[c]	((CAETHG_RS16640) or (CAETHG_RS07000))	CAETHG_RS07000 CAETHG_RS16640		Polyprenyl Diphosphate Biosynthesis	0	0	1000	2.5.1.31	7 Isopentenyldiphosphate + trans,trans,cis-Geranylgeranyl diphosphate -> 7 PPi + Bactoprenyl diphosphate		0	0	0	0	0	0	0	0	0	0	0	0	0	0	0	0	0	0	0	0	0	0	0	0	0	0	0	0	0	0	0	0	0	0	0	0	0
rxn03062_c0	3-Isopropylmalate:NAD+ oxidoreductase c0	S_cpd00003[c] + S_cpd02693[c] <=> S_cpd00004[c] + S_cpd00067[c] + S_cpd02605[c]	((CAETHG_RS08690) or (CAETHG_RS14760))	CAETHG_RS08690 CAETHG_RS14760		Leucine biosynthesis	1	-1000	1000	1.1.1.85	NAD + 3-Isopropylmalate <=> NADH + H+ + 2-isopropyl-3-oxosuccinate		0.00856853	0.00856853	0.00856853	0.00877752	0.00862078	9.04947e-05	0.00877752	0.00877752	0.00856853	0.00877752	0.00872527	9.04947e-05	0.00856853	0.00877752	0.00867302	0.000104494	0.00877752	0.00856853	0.00867302	0.000104494	0.00856853	0.00856853	0.00856853	0.00856853	0	0.00877752	0.00877752	0.00877752	0.00898651	0.00882976	9.04947e-05	0.00877752	0.00877752	0.00877752	0	0.00417977	0.00409617
rxn01171_c0	alpha-D-Glucose 1-epimerase c0	S_cpd00027[c] <=> S_cpd00190[c]	((CAETHG_RS19300) or (CAETHG_RS10960))	CAETHG_RS10960 CAETHG_RS19300		Glycolysis/Gluconeogenesis	1	-1000	1000	5.1.3.3	D-Glucose <=> beta-D-Glucose		0	0	0	0	0	0	0	0	0	0	0	0	0	0	0	0	0	0	0	0	0	0	0	0	0	0	0	0	0	0	0	0	0	0	0	0	0
rxn01388_c0	isocitrate hydro-lyase c0	S_cpd00260[c] <=> S_cpd00001[c] + S_cpd00331[c]	(() and ((CAETHG_RS05015) or (CAETHG_RS13540)))	CAETHG_RS05015 CAETHG_RS13540		Citric Acid Cycle	1	-1000	1000	4.2.1.3	Isocitrate <=> H2O + cis-Aconitate		-0.0310225	-0.0310225	-0.0310225	-0.0317791	-0.0312116	0.000327637	-0.0317791	-0.0317791	-0.0310225	-0.0317791	-0.0315899	0.000327637	-0.0310225	-0.0317791	-0.0314008	0.000378323	-0.0317791	-0.0310225	-0.0314008	0.000378323	-0.0310225	-0.0310225	-0.0310225	-0.0310225	0	-0.0317791	-0.0317791	-0.0317791	-0.0325358	-0.0319683	0.000327637	-0.0317791	-0.0317791	-0.0317791	0	-0.0151329	-0.0148303
rxn05421_c0	8-methyl-nonanoyl-ACP:malonyl-[acyl-carrier-protein] C-acyltransferase (decarboxylating) c0	S_cpd00067[c] + S_cpd11492[c] + S_cpd11557[c] -> S_cpd00011[c] + S_cpd11493[c] + S_cpd11558[c]	((CAETHG_RS10005) and (CAETHG_RS09985))	CAETHG_RS09985 CAETHG_RS10005		Fatty Acid Biosynthesis FASII	0	0	1000	2.3.1.0	H+ + Malonyl-acyl-carrierprotein + 8-methyl-nonanoyl-ACP -> CO2 + ACP + 10-methyl-3-oxo-undecanoyl-ACP		0	0	0	0	0	0	0	0	0	0	0	0	0	0	0	0	0	0	0	0	0	0	0	0	0	0	0	0	0	0	0	0	0	0	0	0	0
rxn10214_c0	isoheptadecanoyl-1-acylglycerol-3-phosphate O-acyltransferase c0	S_cpd11432[c] + S_cpd15671[c] -> S_cpd00010[c] + S_cpd15677[c]	((CAETHG_RS13530) or (CAETHG_RS08580))	CAETHG_RS08580 CAETHG_RS13530		Phosphate metabolism|Glycerolipid and Glycerophospholipid Metabolism in Bacteria	0	0	1000	2.3.1.51	fa11coa + 1-isoheptadecanoyl-sn-glycerol 3-phosphate -> CoA + 1,2-diisoheptadecanoyl-sn-glycerol 3-phosphate		0	0	0	0	0	0	0	0	0	0	0	0	0	0	0	0	0	0	0	0	0	0	0	0	0	0	0	0	0	0	0	0	0	0	0	0	0
rxn03446_c0	O-Phospho-4-hydroxy-L-threonine phospho-lyase (adding water) c0	S_cpd00001[c] + S_cpd03607[c] -> S_cpd00009[c] + S_cpd00067[c] + S_cpd03608[c]	((CAETHG_RS09115) or (CAETHG_RS05835))	CAETHG_RS05835 CAETHG_RS09115		Threonine and Homoserine Biosynthesis	0	0	1000	4.2.3.1	H2O + 4-(Phosphonooxy)-threonine -> Phosphate + H+ + 4-Hydroxy-L-threonine		0	0	0	0	0	0	0	0	0	0	0	0	0	0	0	0	0	0	0	0	0	0	0	0	0	0	0	0	0	0	0	0	0	0	0	0	0
rxn05593_c0	inositol transport in via proton symport c0	S_cpd00067[e] + S_cpd00121[e] <=> S_cpd00067[c] + S_cpd00121[c]	(CAETHG_RS18110)	CAETHG_RS18110		Inositol catabolism	1	-1000	1000		H+ + L-Inositol <=> H+ + L-Inositol		0	0	0	0	0	0	0	0	0	0	0	0	0	0	0	0	0	0	0	0	0	0	0	0	0	0	0	0	0	0	0	0	0	0	0	0	0
rxn01519_c0	dUTP nucleotidohydrolase c0	S_cpd00001[c] + S_cpd00358[c] -> S_cpd00012[c] + S_cpd00299[c]	(CAETHG_RS15240)	CAETHG_RS15240		Folate Biosynthesis|Folate Biosynthesis (Phoenix Copy)|Nucleoside triphosphate pyrophosphohydrolase MazG	0	0	1000	3.6.1.19,3.6.1.23	H2O + dUTP -> PPi + dUMP		0.0012092	0.0012092	0.0012092	0.00123869	0.00121657	1.27707e-05	0.00123869	0.00123869	0.0012092	0.00123869	0.00123132	1.27707e-05	0.0012092	0.00123869	0.00122394	1.47463e-05	0.00123869	0.0012092	0.00122394	1.47463e-05	0.0012092	0.0012092	0.0012092	0.0012092	5.93752e-16	0.00123869	0.00123869	0.00123869	0.00126818	0.00124606	1.27707e-05	0.00123869	0.00123869	0.00123869	0	0.000589853	0.000578056
rxn09996_c0	teichuronic acid (n-45), unlinked, GalNAc-GlcA repeated c0	45 S_cpd00144[c] + 45 S_cpd00175[c] <=> 45 S_cpd00014[c] + 45 S_cpd00067[c] + 45 S_cpd00091[c] + S_cpd15634[c]	(() and () and () and (CAETHG_RS06325) and () and ())	CAETHG_RS06325		Teichuronic acid biosynthesis	1	-1000	1000		45 UDPglucuronate + 45 UDP-N-acetyl-D-galactosamine <=> 45 UDP + 45 H+ + 45 UMP + teichuronic acid (GlcA + GalNac, 45 repeating unit)		0	0	0	0	0	0	0	0	0	0	0	0	0	0	0	0	0	0	0	0	0	0	0	0	0	0	0	0	0	0	0	0	0	0	0	0	0
rxn00029_c0	5-Aminolevulinate hydro-lyase(adding 5-aminolevulinate and c0	2 S_cpd00338[c] -> 2 S_cpd00001[c] + S_cpd00067[c] + S_cpd00689[c]	(CAETHG_RS05385)	CAETHG_RS05385		Experimental tye|Zinc regulated enzymes|Heme and Siroheme Biosynthesis	0	0	1000	4.2.1.24	2 5-Aminolevulinate -> 2 H2O + H+ + Porphobilinogen		0	0	0	0	0	0	0	0	0	0	0	0	0	0	0	0	0	0	0	0	0	0	0	0	0	0	0	0	0	0	0	0	0	0	0	0	0
rxn10338_c0	anteisoheptadecanoyl-cardiolipin synthase c0	2 S_cpd15723[c] <=> S_cpd00100[c] + S_cpd15795[c]	((CAETHG_RS14670) or (CAETHG_RS04280))	CAETHG_RS04280 CAETHG_RS14670		Glycerolipid and Glycerophospholipid Metabolism in Bacteria	1	-1000	1000		2 Dianteisoheptadecanoylphosphatidylglycerol <=> Glycerol + Anteisoheptadecanoylcardiolipin (B. subtilis)		0	0	0	0	0	0	0	0	0	0	0	0	0	0	0	0	0	0	0	0	0	0	0	0	0	0	0	0	0	0	0	0	0	0	0	0	0
rxn09687_c0	deoxyinosine transport in via proton symport c0	S_cpd00067[e] + S_cpd03279[e] <=> S_cpd00067[c] + S_cpd03279[c]	(CAETHG_RS19245)	CAETHG_RS19245		Deoxyribose and Deoxynucleoside Catabolism	1	-1000	1000		H+ + Deoxyinosine <=> H+ + Deoxyinosine		0	0	0	0	0	0	0	0	0	0	0	0	0	0	0	0	0	0	0	0	0	0	0	0	0	0	0	0	0	0	0	0	0	0	0	0	0
rxn04413_c0	rxn04413 c0	S_cpd00038[c] + S_cpd03918[c] -> S_cpd00031[c] + S_cpd00067[c] + S_cpd03919[c]	(CAETHG_RS07025)	CAETHG_RS07025		Cobalamin synthesis|Coenzyme B12 biosynthesis	0	0	1000	2.7.1.156	GTP + Adenosyl cobinamide -> GDP + H+ + Adenosyl cobinamide phosphate		0	0	0	0	0	0	0	0	0	0	0	0	0	0	0	0	0	0	0	0	0	0	0	0	0	0	0	0	0	0	0	0	0	0	0	0	0
rxn01316_c0	N-Acetylneuraminate pyruvate-lyase (pyruvate-phosphorylating) c0	S_cpd00001[c] + S_cpd00061[c] + S_cpd00492[c] -> S_cpd00009[c] + S_cpd00067[c] + S_cpd00232[c]	(CAETHG_RS12945)	CAETHG_RS12945		CMP-N-acetylneuraminate Biosynthesis|Streptococcus agalactiae virulome|Sialic Acid Metabolism	0	0	1000	2.5.1.56,4.1.3.19	H2O + Phosphoenolpyruvate + N-Acetyl-D-mannosamine -> Phosphate + H+ + Neu5Ac		0	0	0	0	0	0	0	0	0	0	0	0	0	0	0	0	0	0	0	0	0	0	0	0	0	0	0	0	0	0	0	0	0	0	0	0	0
rxn10263_c0	anteisopentadecanoyl-CDPdiacylglycerol:sn-glycerol-3-phosphate 3-phosphatidyltransferase c0	S_cpd00080[c] + S_cpd15687[c] <=> S_cpd00046[c] + S_cpd15720[c]	((CAETHG_RS16745) or (CAETHG_RS06675))	CAETHG_RS06675 CAETHG_RS16745		Glycerolipid and Glycerophospholipid Metabolism in Bacteria	1	-1000	1000	2.7.8.5	Glycerol-3-phosphate + CDP-1,2-dianteisopentadecanoylglycerol <=> CMP + Dianteisopentadecanoylphosphatidylglycerophosphate		0	0	0	0	0	0	0	0	0	0	0	0	0	0	0	0	0	0	0	0	0	0	0	0	0	0	0	0	0	0	0	0	0	0	0	0	0
rxn05647_c0	salicin transport via PEP:Pyr PTS c0	S_cpd00061[c] + S_cpd01030[e] <=> S_cpd00020[c] + S_cpd03698[c]	(() and () and (CAETHG_RS09185) and () and ())	CAETHG_RS09185		Beta-Glucoside Metabolism	1	-1000	1000		Phosphoenolpyruvate + Salicin <=> Pyruvate + Salicin-6P		0	0	0	0	0	0	0	0	0	0	0	0	0	0	0	0	0	0	0	0	0	0	0	0	0	0	0	0	0	0	0	0	0	0	0	0	0
rxn01964_c0	L-Serine hydro-lyase (adding indoleglycerol-phosphate) c0	S_cpd00054[c] + S_cpd02210[c] -> S_cpd00001[c] + S_cpd00065[c] + S_cpd00102[c]	(() and (CAETHG_RS18200))	CAETHG_RS18200		Tryptophan synthesis	0	0	1000	4.2.1.20	L-Serine + Indoleglycerol phosphate -> H2O + L-Tryptophan + Glyceraldehyde3-phosphate		0.000931569	0.000931569	0.000931569	0.00095429	0.000937249	9.83857e-06	0.00095429	0.00095429	0.000931569	0.00095429	0.00094861	9.83857e-06	0.000931569	0.00095429	0.00094293	1.13606e-05	0.00095429	0.000931569	0.00094293	1.13606e-05	0.000931569	0.000931569	0.000931569	0.000931569	0	0.00095429	0.00095429	0.00095429	0.000977012	0.000959971	9.83857e-06	0.00095429	0.00095429	0.00095429	0	0.000454424	0.000445336
rxn00559_c0	D-Mannose-6-phosphate ketol-isomerase c0	S_cpd00235[c] <=> S_cpd00072[c]	((CAETHG_RS08665) or (CAETHG_RS19590))	CAETHG_RS08665 CAETHG_RS19590			1	-1000	1000	5.3.1.8	D-mannose-6-phosphate <=> D-fructose-6-phosphate		0	0	0	0	0	0	0	0	0	0	0	0	0	0	0	0	0	0	0	0	0	0	0	0	0	0	0	0	0	0	0	0	0	0	0	0	0
rxn01641_c0	5-Formiminotetrahydrofolate:L-glutamate N-formiminotransferase c0	S_cpd00023[c] + S_cpd00502[c] <=> S_cpd00087[c] + S_cpd00344[c]	(CAETHG_RS01125)	CAETHG_RS01125		Histidine Degradation	1	-1000	1000	2.1.2.5	L-Glutamate + 5-Formiminotetrahydrofolate <=> Tetrahydrofolate + N-Formimino-L-glutamate		0	0	0	0	0	0	0	0	0	0	0	0	0	0	0	0	0	0	0	0	0	0	0	0	0	0	0	0	0	0	0	0	0	0	0	0	0
rxn10341_c0	anteisopentadecanoyl-cardiolipin synthase c0	2 S_cpd15726[c] <=> S_cpd00100[c] + S_cpd15798[c]	((CAETHG_RS14670) or (CAETHG_RS04280))	CAETHG_RS04280 CAETHG_RS14670		Glycerolipid and Glycerophospholipid Metabolism in Bacteria	1	-1000	1000		2 Dianteisopentadecanoylphosphatidylglycerol <=> Glycerol + Anteisopentadecanoylcardiolipin (B. subtilis)		0	0	0	0	0	0	0	0	0	0	0	0	0	0	0	0	0	0	0	0	0	0	0	0	0	0	0	0	0	0	0	0	0	0	0	0	0
rxn03537_c0	Adenosyl cobinamide phosphate guanyltransferase c0	S_cpd00038[c] + S_cpd00067[c] + S_cpd03919[c] <=> S_cpd00012[c] + S_cpd03920[c]	(CAETHG_RS07025)	CAETHG_RS07025		Cobalamin synthesis|Coenzyme B12 biosynthesis	1	-1000	1000	2.7.7.62	GTP + H+ + Adenosyl cobinamide phosphate <=> PPi + Adenosylcobinamide-GDP		0	0	0	0	0	0	0	0	0	0	0	0	0	0	0	0	0	0	0	0	0	0	0	0	0	0	0	0	0	0	0	0	0	0	0	0	0
rxn12510_c0	ATP:pantothenate 4'-phosphotransferase c0	S_cpd00002[c] + S_cpd00644[c] <=> S_cpd00008[c] + S_cpd02201[c]	(CAETHG_RS09680)	CAETHG_RS09680		Coenzyme A Biosynthesis	1	-1000	1000	2.7.1.33	ATP + PAN <=> ADP + 4-phosphopantothenate		1.42065e-06	1.42065e-06	1.42065e-06	1.4553e-06	1.42931e-06	1.50039e-08	1.4553e-06	1.4553e-06	1.42065e-06	1.4553e-06	1.44664e-06	1.50039e-08	1.42065e-06	1.4553e-06	1.43798e-06	1.7325e-08	1.4553e-06	1.42065e-06	1.43798e-06	1.7325e-08	1.42065e-06	1.42065e-06	1.42065e-06	1.42065e-06	0	1.4553e-06	1.4553e-06	1.4553e-06	1.48995e-06	1.46396e-06	1.50039e-08	1.4553e-06	1.4553e-06	1.4553e-06	0	6.93e-07	6.7914e-07
rxn05392_c0	7-methyl-octanoyl-ACP:malonyl-[acyl-carrier-protein] C-acyltransferase (decarboxylating) c0	S_cpd00067[c] + S_cpd11492[c] + S_cpd11528[c] -> S_cpd00011[c] + S_cpd11493[c] + S_cpd11529[c]	((CAETHG_RS10005) and (CAETHG_RS09985))	CAETHG_RS09985 CAETHG_RS10005		Fatty Acid Biosynthesis FASII	0	0	1000	2.3.1.0	H+ + Malonyl-acyl-carrierprotein + 7-methyl-octanoyl-ACP -> CO2 + ACP + 9-methyl-3-oxo-decanoyl-ACP		0	0	0	0	0	0	0	0	0	0	0	0	0	0	0	0	0	0	0	0	0	0	0	0	0	0	0	0	0	0	0	0	0	0	0	0	0
rxn00161_c0	(S)-Malate:NADP+ oxidoreductase(oxaloacetate-decarboxylating) c0	S_cpd00006[c] + S_cpd00130[c] -> S_cpd00005[c] + S_cpd00011[c] + S_cpd00020[c]	((CAETHG_RS12200) or (CAETHG_RS08235))	CAETHG_RS08235 CAETHG_RS12200		Pyruvate Metabolism	0	0	1000	1.1.1.38,1.1.1.39,1.1.1.40,4.1.1.3	NADP + L-Malate -> NADPH + CO2 + Pyruvate		0	0	0	0	0	0	0	0	0	0	0	0	0	0	0	0	0	0	0	0	0	0	0	0	0	0	0	0	0	0	0	0	0	0	0	0	0
rxn09207_c0	Phosphatidylserine syntase (n-C14:1) c0	S_cpd00054[c] + S_cpd15422[c] -> S_cpd00046[c] + S_cpd00067[c] + S_cpd15554[c]	(CAETHG_RS11850)	CAETHG_RS11850		Glycerolipid and Glycerophospholipid Metabolism in Bacteria	0	0	1000	2.7.8.8	L-Serine + CDP-1,2-ditetradec-7-enoylglycerol -> CMP + H+ + phosphatidylserine ditetradec-7-enoyl		0	0	0	0	0	0	0	0	0	0	0	0	0	0	0	0	0	0	0	0	0	0	0	0	0	0	0	0	0	0	0	0	0	0	0	0	0
rxn02380_c0	beta-D-Glucose 6-phosphate ketol-isomerase c0	S_cpd00863[c] <=> S_cpd00072[c]	(CAETHG_RS07610)	CAETHG_RS07610		Glycolysis/Gluconeogenesis	1	-1000	1000	5.3.1.9	beta-D-Glucose 6-phosphate <=> D-fructose-6-phosphate		0	0	0	0	0	0	0	0	0	0	0	0	0	0	0	0	0	0	0	0	0	0	0	0	0	0	0	0	0	0	0	0	0	0	0	0	0
rxn00474_c0	L-Serine hydro-lyase (adding indoleglycerol-phosphate) c0	S_cpd00054[c] + S_cpd00359[c] -> S_cpd00001[c] + S_cpd00065[c]	(() and (CAETHG_RS18200))	CAETHG_RS18200		Tryptophan synthesis	0	0	1000	4.2.1.20	L-Serine + indol -> H2O + L-Tryptophan		0	0	0	0	0	0	0	0	0	0	0	0	0	0	0	0	0	0	0	0	0	0	0	0	0	0	0	0	0	0	0	0	0	0	0	0	0
rxn09114_c0	Phosphatidylglycerol synthase (n-C18:1) c0	S_cpd00080[c] + S_cpd15420[c] <=> S_cpd00046[c] + S_cpd15548[c]	((CAETHG_RS16745) or (CAETHG_RS06675))	CAETHG_RS06675 CAETHG_RS16745		Glycerolipid and Glycerophospholipid Metabolism in Bacteria	1	-1000	1000	2.7.8.5	Glycerol-3-phosphate + CDP-1,2-dioctadec-11-enoylglycerol <=> CMP + Phosphatidylglycerophosphate dioctadec-11-enoyl		0	0	0	0	0	0	0	0	0	0	0	0	0	0	0	0	0	0	0	0	0	0	0	0	0	0	0	0	0	0	0	0	0	0	0	0	0
rxn05582_c0	glycine transport in/out via proton symport c0	S_cpd00033[e] + S_cpd00067[e] <=> S_cpd00033[c] + S_cpd00067[c]	((CAETHG_RS12240) or (CAETHG_RS09250) or (CAETHG_RS14390) or (CAETHG_RS19125))	CAETHG_RS09250 CAETHG_RS12240 CAETHG_RS14390 CAETHG_RS19125		Transport Reactions	1	-1000	1000	proton	Glycine + H+ <=> Glycine + H+		0	0	0	0	0	0	0	0	0	0	0	0	0	0	0	0	0	0	0	0	0	0	0	0	0	0	0	0	0	0	0	0	0	0	0	0	0
rxn03435_c0	(R)-2,3-Dihydroxy-3-methylpentanoate:NADP+ oxidoreductase c0	S_cpd00006[c] + S_cpd02535[c] <=> S_cpd00005[c] + S_cpd00067[c] + S_cpd10162[c]	((CAETHG_RS00580) or (CAETHG_RS17845))	CAETHG_RS00580 CAETHG_RS17845		Isoleucine Biosynthesis	1	-1000	1000	1.1.1.86	NADP + 2,3-Dihydroxy-3-methylvalerate <=> NADPH + H+ + (R)-3-Hydroxy-3-methyl-2-oxopentanoate		-0.00708964	-0.00708964	-0.00708964	-0.00726256	-0.00713287	7.48757e-05	-0.00726256	-0.00726256	-0.00708964	-0.00726256	-0.00721933	7.48757e-05	-0.00708964	-0.00726256	-0.0071761	8.6459e-05	-0.00726256	-0.00708964	-0.0071761	8.6459e-05	-0.00708964	-0.00708964	-0.00708964	-0.00708964	0	-0.00726256	-0.00726256	-0.00726256	-0.00743548	-0.00730579	7.48757e-05	-0.00726256	-0.00726256	-0.00726256	0	-0.00345836	-0.00338919
rxn12845_c0	Gly-Leu aminopeptidase c0	S_cpd00001[c] + S_cpd15604[c] <=> S_cpd00033[c] + S_cpd00107[c]	(((CAETHG_RS04585) or (CAETHG_RS15660)) or (CAETHG_RS03545) or (CAETHG_RS07155))	CAETHG_RS03545 CAETHG_RS04585 CAETHG_RS07155 CAETHG_RS15660		Recycling of Peptidoglycan Amino Acids|Protein degradation	1	-1000	1000	3.4.11.2	H2O + Gly-Leu <=> Glycine + L-Leucine		0	0	0	0	0	0	0	0	0	0	0	0	0	0	0	0	0	0	0	0	0	0	0	0	0	0	0	0	0	0	0	0	0	0	0	0	0
rxn00085_c0	L-Glutamate:NADP+ oxidoreductase (transaminating) c0	S_cpd00006[c] + 2 S_cpd00023[c] <=> S_cpd00005[c] + S_cpd00024[c] + S_cpd00053[c] + S_cpd00067[c]	(((CAETHG_RS02275) or (CAETHG_RS02135) or (CAETHG_RS02240) or (CAETHG_RS18890)) and ((CAETHG_RS18885) or (CAETHG_RS07665)))	CAETHG_RS02135 CAETHG_RS02240 CAETHG_RS02275 CAETHG_RS07665 CAETHG_RS18885 CAETHG_RS18890		Glutamate and Glutamine Metabolism	1	-1000	0	1.4.1.13	NADP + 2 L-Glutamate <=> NADPH + 2-Oxoglutarate + L-Glutamine + H+		0	0	0	0	0	0	0	0	0	0	0	0	0	0	0	0	0	0	0	0	0	0	0	0	0	0	0	0	0	0	0	0	0	0	0	0	0
rxn05340_c0	(3R)-3-Hydroxydodecanoyl-[acyl-carrier-protein]:NADP+ oxidoreductase c0	S_cpd00006[c] + S_cpd11480[c] <=> S_cpd00005[c] + S_cpd00067[c] + S_cpd11489[c]	((CAETHG_RS08435) or (CAETHG_RS00375) or (CAETHG_RS00860) or (CAETHG_RS04365) or (CAETHG_RS06705) or (CAETHG_RS03500) or (CAETHG_RS04680) or (CAETHG_RS09990))	CAETHG_RS00375 CAETHG_RS00860 CAETHG_RS03500 CAETHG_RS04365 CAETHG_RS04680 CAETHG_RS06705 CAETHG_RS08435 CAETHG_RS09990		mycolic acid synthesis|Fatty Acid Biosynthesis FASII	1	-1000	1000		NADP + D-3-Hydroxydodecanoyl-[acp] <=> NADPH + H+ + 3-oxododecanoyl-acp		0	0	0	0	0	0	0	0	0	0	0	0	0	0	0	0	0	0	0	0	0	0	0	0	0	0	0	0	0	0	0	0	0	0	0	0	0
rxn00832_c0	IMP 1,2-hydrolase (decyclizing) c0	S_cpd00001[c] + S_cpd00114[c] <=> S_cpd02884[c]	(((CAETHG_RS01505) or (CAETHG_RS14515)) and ((CAETHG_RS01505) or (CAETHG_RS14515)))	CAETHG_RS01505 CAETHG_RS14515		De Novo Purine Biosynthesis	1	-1000	1000	3.5.4.10	H2O + IMP <=> FAICAR		-0.00959997	-0.00959997	-0.00959997	-0.00983411	-0.0096585	0.000101388	-0.00983411	-0.00983411	-0.00959997	-0.00983411	-0.00977558	0.000101388	-0.00959997	-0.00983411	-0.00971704	0.000117073	-0.00983411	-0.00959997	-0.00971704	0.000117073	-0.00959997	-0.00959997	-0.00959997	-0.00959997	1.07185e-13	-0.00983411	-0.00983411	-0.00983411	-0.0100683	-0.00989265	0.000101388	-0.00983411	-0.00983411	-0.00983411	5.68434e-14	-0.00468291	-0.00458925
rxn00295_c0	UDP-N-acetyl-D-glucosamine 4-epimerase c0	S_cpd00037[c] <=> S_cpd00175[c]	((CAETHG_RS01225) or (CAETHG_RS15175))	CAETHG_RS01225 CAETHG_RS15175		N-linked Glycosylation in Bacteria|Lactose and Galactose Uptake and utilisation|Lacto-N-Biose I and Galacto-N-Biose Metabolic Pathway|Rhamnose containing glycans|linker unit-arabinogalactan synthesis	1	-1000	1000	5.1.3.7	UDP-N-acetylglucosamine <=> UDP-N-acetyl-D-galactosamine		0	0	0	0	0	0	0	0	0	0	0	0	0	0	0	0	0	0	0	0	0	0	0	0	0	0	0	0	0	0	0	0	0	0	0	0	0
rxn00265_c0	Citrate oxaloacetate-lyase ((pro-3S)-CH2COO- -->acetate) c0	S_cpd00137[c] -> S_cpd00029[c] + S_cpd00032[c]	(((CAETHG_RS09205) or (CAETHG_RS12220) or (CAETHG_RS02860) or (CAETHG_RS05025)) or ((CAETHG_RS12215) or (CAETHG_RS05030) or (CAETHG_RS02865) or (CAETHG_RS09210)) or ((CAETHG_RS12225) or (CAETHG_RS09200) or (CAETHG_RS02855) or (CAETHG_RS05020)))	CAETHG_RS02855 CAETHG_RS02860 CAETHG_RS02865 CAETHG_RS05020 CAETHG_RS05025 CAETHG_RS05030 CAETHG_RS09200 CAETHG_RS09205 CAETHG_RS09210 CAETHG_RS12215 CAETHG_RS12220 CAETHG_RS12225		Citrate Metabolism, Transport, and Regulation	0	0	1000	4.1.3.6	Citrate -> Acetate + Oxaloacetate		0	0	0	0	0	0	0	0	0	0	0	0	0	0	0	0	0	0	0	0	0	0	0	0	0	0	0	0	0	0	0	0	0	0	0	0	0
rxn05317_c0	DADNt2 c0	S_cpd00067[e] + S_cpd00438[e] <=> S_cpd00067[c] + S_cpd00438[c]	(() and (CAETHG_RS19245))	CAETHG_RS19245		Deoxyribose and Deoxynucleoside Catabolism	1	-1000	1000		H+ + Deoxyadenosine <=> H+ + Deoxyadenosine		0	0	0	0	0	0	0	0	0	0	0	0	0	0	0	0	0	0	0	0	0	0	0	0	0	0	0	0	0	0	0	0	0	0	0	0	0
rxn01368_c0	Cytidine aminohydrolase c0	S_cpd00001[c] + S_cpd00067[c] + S_cpd00367[c] -> S_cpd00013[c] + S_cpd00249[c]	(CAETHG_RS19235)	CAETHG_RS19235		Pyrimidine conversions	0	0	1000	3.5.4.5	H2O + H+ + Cytidine -> NH3 + Uridine		0	0	0	0	0	0	0	0	0	0	0	0	0	0	0	0	0	0	0	0	0	0	0	0	0	0	0	0	0	0	0	0	0	0	0	0	0
rxn02187_c0	2-Acetolactate methylmutase c0	S_cpd00668[c] <=> S_cpd02569[c]	((CAETHG_RS00580) or (CAETHG_RS17845))	CAETHG_RS00580 CAETHG_RS17845		Valine biosynthesis	1	-1000	1000	1.1.1.86	ALCTT <=> 2-Oxo-3-hydroxyisovalerate		0.10568	0.1153	0.13032	0.117493	0.117198	0.00878266	0.126613	0.102413	0.15254	0.108993	0.12264	0.0193984	0.0166234	0.0170289	0.0168262	0.000202725	0.0170289	0.0166234	0.0168262	0.000202725	0.11934	0.0166234	0.0867294	0.0742311	0.0428552	0.116093	0.0546484	0.0176984	0.0300174	0.0546143	0.0379059	0.093453	0.136798	0.115126	0.0216727	0.0534538	0.0515847
rxn01219_c0	ATP:CMP phosphotransferase c0	S_cpd00002[c] + S_cpd00206[c] <=> S_cpd00008[c] + S_cpd00533[c]	(CAETHG_RS01040)	CAETHG_RS01040		Pyrimidine conversions	1	-1000	1000	2.7.4.14	ATP + dCMP <=> ADP + dCDP		0	0	0	0	0	0	0	0	0	0	0	0	0	0	0	0	0	0	0	0	0	0	0	0	0	0	0	0	0	0	0	0	0	0	0	0	0
rxn03514_c0	S-adenosyl-L-methionine:precorrin-4 C11 methyltransferase c0	S_cpd00017[c] + S_cpd03834[c] <=> S_cpd00019[c] + S_cpd00067[c] + S_cpd03839[c]	(CAETHG_RS05345)	CAETHG_RS05345		Cobalamin synthesis|Coenzyme B12 biosynthesis	1	-1000	1000	2.1.1.133	S-Adenosyl-L-methionine + Precorrin 4 <=> S-Adenosyl-homocysteine + H+ + Precorrin 5		0	0	0	0	0	0	0	0	0	0	0	0	0	0	0	0	0	0	0	0	0	0	0	0	0	0	0	0	0	0	0	0	0	0	0	0	0
rxn01270_c0	L-Aspartate:2-oxoglutarate aminotransferase c0	S_cpd00032[c] + S_cpd00616[c] <=> S_cpd00041[c] + S_cpd00219[c]	(CAETHG_RS12490)	CAETHG_RS12490		Phenylalanine and Tyrosine Synthesis	1	-1000	1000	2.6.1.57,2.6.1.78	Oxaloacetate + Pretyrosine <=> L-Aspartate + Prephenate		0	0	0	0	0	0	0	0	0	0	0	0	0	0	0	0	0	0	0	0	0	0	0	0	0	0	0	0	0	0	0	0	0	0	0	0	0
rxn10287_c0	anteisopentadecanoyl-UDP-glucosyltransferase (monoglucosyl) c0	S_cpd00026[c] + S_cpd15705[c] <=> S_cpd00014[c] + S_cpd15744[c]	(CAETHG_RS11420)	CAETHG_RS11420		Teichoic and lipoteichoic acids biosynthesis	1	-1000	1000		UDP-glucose + 1,2-Dianteisopentadecanoyl-sn-glycerol <=> UDP + Monoglucosyl-1,2 dianteisopentadecanoylglycerol		0	0	0	0	0	0	0	0	0	0	0	0	0	0	0	0	0	0	0	0	0	0	0	0	0	0	0	0	0	0	0	0	0	0	0	0	0
rxn00272_c0	L-Alanine:glyoxylate aminotransferase c0	S_cpd00035[c] + S_cpd00040[c] <=> S_cpd00020[c] + S_cpd00033[c]	(() and ((CAETHG_RS10930) or (CAETHG_RS10845)))	CAETHG_RS10845 CAETHG_RS10930		Glycoxylate cycle	1	-1000	1000	2.6.1.44	L-Alanine + Glyoxalate <=> Pyruvate + Glycine		0	0	0	0	0	0	0	0	0	0	0	0	0	0	0	0	0	0	0	0	0	0	0	0	0	0	0	0	0	0	0	0	0	0	0	0	0
rxn10160_c0	D-galactonate transport via proton symport, reversible c0	S_cpd00067[e] + S_cpd00653[e] <=> S_cpd00067[c] + S_cpd00653[c]	(CAETHG_RS16915)	CAETHG_RS16915		D-galactonate catabolism	1	-1000	1000		H+ + D-Galactonate <=> H+ + D-Galactonate		0	0	0	0	0	0	0	0	0	0	0	0	0	0	0	0	0	0	0	0	0	0	0	0	0	0	0	0	0	0	0	0	0	0	0	0	0
rxn07441_c0	LL-2,6-diaminoheptanedioate:2-oxoglutarate aminotransferase c0	S_cpd00024[c] + S_cpd00504[c] -> S_cpd00001[c] + S_cpd00023[c] + S_cpd00067[c] + S_cpd02465[c]	(CAETHG_RS17235)	CAETHG_RS17235		Lysine Biosynthesis DAP Pathway	0	0	1000	2.6.1.83	2-Oxoglutarate + LL-2,6-Diaminopimelate -> H2O + L-Glutamate + H+ + tetrahydrodipicolinate		0	0	0	0	0	0	0	0	0	0	0	0	0	0	0	0	0	0	0	0	0	0	0	0	0	0	0	0	0	0	0	0	0	0	0	0	0
rxn01021_c0	Methylthioadenosine methylthioribohydrolase c0	S_cpd00001[c] + S_cpd00147[c] <=> S_cpd00128[c] + S_cpd01981[c]	(((CAETHG_RS15525) or (CAETHG_RS19065) or (CAETHG_RS03510)) and ((CAETHG_RS15525) or (CAETHG_RS19065) or (CAETHG_RS03510)))	CAETHG_RS03510 CAETHG_RS15525 CAETHG_RS19065		Polyamine Metabolism|Adenosyl nucleosidases|Methionine Salvage|Menaqui Biosynthesis via Futalosine	1	-1000	1000	3.2.2.16,3.2.2.9	H2O + 5-Methylthioadenosine <=> Adenine + 5-Methylthio-D-ribose		0	0	0	0	0	0	0	0	0	0	0	0	0	0	0	0	0	0	0	0	0	0	0	0	0	0	0	0	0	0	0	0	0	0	0	0	0
rxn05543_c0	Dipeptide transport via ABC system (ala-his) c0	S_cpd00001[c] + S_cpd00002[c] + S_cpd11584[e] -> S_cpd00008[c] + S_cpd00009[c] + S_cpd00067[c] + S_cpd11584[c]	(CAETHG_RS07520)	CAETHG_RS07520		ABC transporter dipeptide (TC 3.A.1.5.2)	0	0	1000		H2O + ATP + Ala-His -> ADP + Phosphate + H+ + Ala-His		0	0	0	0	0	0	0	0	0	0	0	0	0	0	0	0	0	0	0	0	0	0	0	0	0	0	0	0	0	0	0	0	0	0	0	0	0
rxn01127_c0	ATP:AMP phosphotransferase c0	S_cpd00002[c] + S_cpd00294[c] <=> S_cpd00008[c] + S_cpd00177[c]	(CAETHG_RS09335)	CAETHG_RS09335		Purine conversions	1	-1000	1000	2.7.4.11,2.7.4.3	ATP + dAMP <=> ADP + dADP		0	0	0	0	0	0	0	0	0	0	0	0	0	0	0	0	0	0	0	0	0	0	0	0	0	0	0	0	0	0	0	0	0	0	0	0	0
rxn08309_c0	CDP-diacylglycerol synthetase (n-C16:0) c0	S_cpd00052[c] + S_cpd15524[c] <=> S_cpd00012[c] + S_cpd15419[c]	(CAETHG_RS16645)	CAETHG_RS16645		Glycerolipid and Glycerophospholipid Metabolism in Bacteria	1	-1000	1000	2.7.7.41	CTP + 1,2-dihexadecanoyl-sn-glycerol 3-phosphate <=> PPi + CDP-1,2-dihexadecanoylglycerol		0	0	0	0	0	0	0	0	0	0	0	0	0	0	0	0	0	0	0	0	0	0	0	0	0	0	0	0	0	0	0	0	0	0	0	0	0
rxn03892_c0	PPTT c0	S_cpd00113[c] + S_cpd02591[c] -> S_cpd00012[c] + S_cpd00906[c]	((CAETHG_RS15870) or (CAETHG_RS09090))	CAETHG_RS09090 CAETHG_RS15870		Proteorhodopsin|Polyprenyl Diphosphate Biosynthesis	0	0	1000	2.5.1.33	Isopentenyldiphosphate + pendp -> PPi + all-trans-Hexaprenyl diphosphate		0	0	0	0	0	0	0	0	0	0	0	0	0	0	0	0	0	0	0	0	0	0	0	0	0	0	0	0	0	0	0	0	0	0	0	0	0
rxn05461_c0	3-Hydroxyoctodecanoyl-ACP:NADP+ oxidoreductase c0	S_cpd00005[c] + S_cpd00067[c] + S_cpd11570[c] <=> S_cpd00006[c] + S_cpd11571[c]	((CAETHG_RS08435) or (CAETHG_RS00375) or (CAETHG_RS00860) or (CAETHG_RS04365) or (CAETHG_RS06705) or (CAETHG_RS03500) or (CAETHG_RS04680) or (CAETHG_RS09990))	CAETHG_RS00375 CAETHG_RS00860 CAETHG_RS03500 CAETHG_RS04365 CAETHG_RS04680 CAETHG_RS06705 CAETHG_RS08435 CAETHG_RS09990		mycolic acid synthesis|Fatty Acid Biosynthesis FASII	1	-1000	1000	1.1.1.0	NADPH + H+ + 3-Oxooctodecanoyl-ACP <=> NADP + 3-Hydroxyoctodecanoyl-ACP		0	0	0	0	0	0	0	0	0	0	0	0	0	0	0	0	0	0	0	0	0	0	0	0	0	0	0	0	0	0	0	0	0	0	0	0	0
rxn00641_c0	GTP:alpha-D-mannose-1-phosphate guanylyltransferase c0	S_cpd00038[c] + S_cpd00485[c] -> S_cpd00012[c] + S_cpd00083[c]	(CAETHG_RS03480)	CAETHG_RS03480		Mannose Metabolism	0	0	1000	2.7.7.13	GTP + D-Mannose1-phosphate -> PPi + GDP-mannose		0	0	0	0	0	0	0	0	0	0	0	0	0	0	0	0	0	0	0	0	0	0	0	0	0	0	0	0	0	0	0	0	0	0	0	0	0
rxn08312_c0	CDP-diacylglycerol synthetase (n-C18:1) c0	S_cpd00052[c] + S_cpd15527[c] <=> S_cpd00012[c] + S_cpd15420[c]	(CAETHG_RS16645)	CAETHG_RS16645		Glycerolipid and Glycerophospholipid Metabolism in Bacteria	1	-1000	1000	2.7.7.41	CTP + 1,2-dioctadec-11-enoyl-sn-glycerol 3-phosphate <=> PPi + CDP-1,2-dioctadec-11-enoylglycerol		0	0	0	0	0	0	0	0	0	0	0	0	0	0	0	0	0	0	0	0	0	0	0	0	0	0	0	0	0	0	0	0	0	0	0	0	0
rxn10271_c0	palmitoyl-UDP-glucosyltransferase (diglucosyl) c0	S_cpd00026[c] + S_cpd15737[c] <=> S_cpd00014[c] + S_cpd15728[c]	(CAETHG_RS11420)	CAETHG_RS11420		Teichoic and lipoteichoic acids biosynthesis	1	-1000	1000		UDP-glucose + Monoglucosyl-1,2 dipalmitoylglycerol <=> UDP + Diglucosyl-1,2 dipalmitoylglycerol		0	0	0	0	0	0	0	0	0	0	0	0	0	0	0	0	0	0	0	0	0	0	0	0	0	0	0	0	0	0	0	0	0	0	0	0	0
rxn05144_c0	rxn05144 c0	S_cpd00053[c] + S_cpd00102[c] + S_cpd00171[c] -> 3 S_cpd00001[c] + S_cpd00009[c] + S_cpd00016[c] + S_cpd00023[c] + 2 S_cpd00067[c]	((CAETHG_RS08730) or ((CAETHG_RS16865) or (CAETHG_RS08735)))	CAETHG_RS08730 CAETHG_RS08735 CAETHG_RS16865		Pyridoxin (Vitamin B6) Biosynthesis	0	0	1000		L-Glutamine + Glyceraldehyde3-phosphate + D-Ribulose5-phosphate -> 3 H2O + Phosphate + Pyridoxal phosphate + L-Glutamate + 2 H+		9.13275e-06	9.13275e-06	9.13275e-06	9.3555e-06	9.18844e-06	9.64536e-08	9.3555e-06	9.3555e-06	9.13275e-06	9.3555e-06	9.29981e-06	9.64536e-08	9.13275e-06	9.3555e-06	9.24413e-06	1.11375e-07	9.3555e-06	9.13275e-06	9.24413e-06	1.11375e-07	9.13275e-06	9.13275e-06	9.13275e-06	9.13275e-06	0	9.3555e-06	9.3555e-06	9.3555e-06	9.57825e-06	9.41119e-06	9.64536e-08	9.3555e-06	9.3555e-06	9.3555e-06	0	4.455e-06	4.3659e-06
rxn12849_c0	Gly-Leu ABC transporters c0	S_cpd00001[c] + S_cpd00002[c] + S_cpd15604[e] -> S_cpd00008[c] + S_cpd00009[c] + S_cpd15604[c]	(CAETHG_RS07520)	CAETHG_RS07520		ABC transporter dipeptide (TC 3.A.1.5.2)	0	0	1000		H2O + ATP + Gly-Leu -> ADP + Phosphate + Gly-Leu		0	0	0	0	0	0	0	0	0	0	0	0	0	0	0	0	0	0	0	0	0	0	0	0	0	0	0	0	0	0	0	0	0	0	0	0	0
rxn00410_c0	UTP:ammonia ligase(ADP-forming) c0	S_cpd00002[c] + S_cpd00013[c] + S_cpd00062[c] -> S_cpd00008[c] + S_cpd00009[c] + S_cpd00052[c] + 2 S_cpd00067[c]	(CAETHG_RS11440)	CAETHG_RS11440		Pyrimidine conversions	0	0	1000	6.3.4.2	ATP + NH3 + UTP -> ADP + Phosphate + CTP + 2 H+		0.00426656	0.00426656	0.00426656	0.00437063	0.00429258	4.50604e-05	0.00437063	0.00437063	0.00426656	0.00437063	0.00434461	4.50604e-05	0.00426656	0.00437063	0.00431859	5.20313e-05	0.00437063	0.00426656	0.00431859	5.20313e-05	0.00426656	0.00426656	0.00426656	0.00426656	0	0.00437063	0.00437063	0.00437063	0.00447469	0.00439664	4.50604e-05	0.00437063	0.00437063	0.00437063	0	0.00208125	0.00203962
rxn05160_c0	D-Ribose ABC transport c0	S_cpd00001[c] + S_cpd00002[c] + S_cpd00105[e] -> S_cpd00008[c] + S_cpd00009[c] + S_cpd00067[c] + S_cpd00105[c]	((CAETHG_RS10995) and ((CAETHG_RS11000) or (CAETHG_RS08750)) and ((CAETHG_RS11005) or (CAETHG_RS08745)) and ())	CAETHG_RS08745 CAETHG_RS08750 CAETHG_RS10995 CAETHG_RS11000 CAETHG_RS11005		D-ribose utilisation	0	0	1000	3.A.1.2	H2O + ATP + D-Ribose -> ADP + Phosphate + H+ + D-Ribose		0	0	0	0	0	0	0	0	0	0	0	0	0	0	0	0	0	0	0	0	0	0	0	0	0	0	0	0	0	0	0	0	0	0	0	0	0
rxn02792_c0	(5-Glutamyl)-peptide:amino-acid 5-glutamyltransferase c0	S_cpd00023[c] + S_cpd00067[c] + S_cpd01651[c] -> S_cpd00001[c] + S_cpd00011[c] + S_cpd03646[c]	(CAETHG_RS19790)	CAETHG_RS19790		utilisation of glutathione as a sulphur source|Glutathione: Biosynthesis and gamma-glutamyl cycle|Glutathione: gamma-glutamyl cycle|Poly-gamma-glutamate biosynthesis	0	0	1000	2.3.2.2	L-Glutamate + H+ + L-3-Cyanoalanine -> H2O + CO2 + gamma-Glutamyl-3-aminopropiononitrile		0	0	0	0	0	0	0	0	0	0	0	0	0	0	0	0	0	0	0	0	0	0	0	0	0	0	0	0	0	0	0	0	0	0	0	0	0
rxn05368_c0	8-methyl-3-oxo-decanoyl-ACP:NADP+ oxidoreductase c0	S_cpd00005[c] + S_cpd00067[c] + S_cpd11504[c] <=> S_cpd00006[c] + S_cpd11505[c]	((CAETHG_RS08435) or (CAETHG_RS00375) or (CAETHG_RS00860) or (CAETHG_RS04365) or (CAETHG_RS06705) or (CAETHG_RS03500) or (CAETHG_RS04680) or (CAETHG_RS09990))	CAETHG_RS00375 CAETHG_RS00860 CAETHG_RS03500 CAETHG_RS04365 CAETHG_RS04680 CAETHG_RS06705 CAETHG_RS08435 CAETHG_RS09990		mycolic acid synthesis|Fatty Acid Biosynthesis FASII	1	-1000	1000	1.1.1.0	NADPH + H+ + 8-methyl-3-oxo-decanoyl-ACP <=> NADP + 8-methyl-3-hydroxy-decanoyl-ACP		0	0	0	0	0	0	0	0	0	0	0	0	0	0	0	0	0	0	0	0	0	0	0	0	0	0	0	0	0	0	0	0	0	0	0	0	0
rxn05221_c0	Na+:proline symport c0	S_cpd00129[e] + S_cpd00971[e] <=> S_cpd00129[c] + S_cpd00971[c]	(CAETHG_RS00645)	CAETHG_RS00645		Transport Reactions	1	0	1000	sodium	L-Proline + Na+ <=> L-Proline + Na+		0	0	0	0	0	0	0	0	0	0	0	0	0	0	0	0	0	0	0	0	0	0	0	0	0	0	0	0	0	0	0	0	0	0	0	0	0
rxn00568_c0	ammonium-hydroxide:NADP+ oxidoreductase c0	3 S_cpd00004[c] + 5 S_cpd00067[c] + S_cpd00075[c] -> 2 S_cpd00001[c] + 3 S_cpd00003[c] + S_cpd00013[c]	(((CAETHG_RS02085) and () and ()) or ((CAETHG_RS02080) or (CAETHG_RS14770)) or (CAETHG_RS14765))	CAETHG_RS02080 CAETHG_RS02085 CAETHG_RS14765 CAETHG_RS14770		Nitrate and nitrite ammonification	0	0	1000	1.7.1.4	3 NADH + 5 H+ + Nitrite -> 2 H2O + 3 NAD + NH3		0	0	0	0	0	0	0	0	0	0	0	0	0	0	0	0	0	0	0	0	0	0	0	0	0	0	0	0	0	0	0	0	0	0	0	0	0
rxn09210_c0	Phosphatidylserine syntase (n-C18:0) c0	S_cpd00054[c] + S_cpd15421[c] -> S_cpd00046[c] + S_cpd00067[c] + S_cpd15557[c]	(CAETHG_RS11850)	CAETHG_RS11850		Glycerolipid and Glycerophospholipid Metabolism in Bacteria	0	0	1000	2.7.8.8	L-Serine + CDP-1,2-dioctadecanoylglycerol -> CMP + H+ + phosphatidylserine dioctadecanoyl		0	0	0	0	0	0	0	0	0	0	0	0	0	0	0	0	0	0	0	0	0	0	0	0	0	0	0	0	0	0	0	0	0	0	0	0	0
rxn00395_c0	L-Arginine iminohydrolase c0	S_cpd00001[c] + S_cpd00051[c] -> S_cpd00013[c] + S_cpd00274[c]	(CAETHG_RS14855)	CAETHG_RS14855		Arginine Deiminase Pathway	0	0	1000	3.5.3.6	H2O + L-Arginine -> NH3 + Citrulline		0	0	0	0	0	0	0	0	0	0	0	0	0	0	0	0	0	0	0	0	0	0	0	0	0	0	0	0	0	0	0	0	0	0	0	0	0
rxn10256_c0	isopentadecanoyl-Diacylglycerol kinase c0	S_cpd00002[c] + S_cpd15704[c] <=> S_cpd00008[c] + S_cpd15680[c]	(CAETHG_RS14270)	CAETHG_RS14270		Glycerolipid and Glycerophospholipid Metabolism in Bacteria	1	-1000	1000	2.7.1.107	ATP + 1,2-Diisopentadecanoyl-sn-glycerol <=> ADP + 1,2-diisopentadecanoyl-sn-glycerol 3-phosphate		0	0	0	0	0	0	0	0	0	0	0	0	0	0	0	0	0	0	0	0	0	0	0	0	0	0	0	0	0	0	0	0	0	0	0	0	0
rxn00171_c0	acetaldehyde:NAD+ oxidoreductase (CoA-acetylating) c0	S_cpd00004[c] + S_cpd00022[c] + S_cpd00067[c] -> S_cpd00003[c] + S_cpd00010[c] + S_cpd00071[c]	((CAETHG_RS16140) or (CAETHG_RS08865) or (CAETHG_RS08810) or (CAETHG_RS18400) or (CAETHG_RS18395))	CAETHG_RS08810 CAETHG_RS08865 CAETHG_RS16140 CAETHG_RS18395 CAETHG_RS18400		Ethanol Fermentation Pathway	0	0	1000	1.2.1.10	NADH + Acetyl-CoA + H+ -> NAD + CoA + Acetaldehyde		0	0	0	0	0	0	0	0	0	0	0	0	0	0	0	0	0	0	0	0	0	0	0	0	0	0	0	0	0	0	0	0	0	0	0	0	0
rxn01000_c0	Prephenate hydro-lyase (decarboxylating) c0	S_cpd00067[c] + S_cpd00219[c] -> S_cpd00001[c] + S_cpd00011[c] + S_cpd00143[c]	((CAETHG_RS02945) or (CAETHG_RS04325))	CAETHG_RS02945 CAETHG_RS04325		Phenylalanine and Tyrosine Synthesis	0	0	1000	4.2.1.51	H+ + Prephenate -> H2O + CO2 + Phenylpyruvate		0.00305613	0.00305613	0.00305613	0.00313067	0.00307477	3.22767e-05	0.00313067	0.00313067	0.00305613	0.00313067	0.00311204	3.22767e-05	0.00305613	0.00313067	0.0030934	3.72699e-05	0.00313067	0.00305613	0.0030934	3.72699e-05	0.00305613	0.00305613	0.00305613	0.00305613	0	0.00313067	0.00313067	0.00313067	0.00320521	0.00314931	3.22767e-05	0.00313067	0.00313067	0.00313067	0	0.0014908	0.00146098
rxn01138_c0	Adenosine:orthophosphate ribosyltransferase c0	S_cpd00009[c] + S_cpd00067[c] + S_cpd00182[c] <=> S_cpd00128[c] + S_cpd00475[c]	(CAETHG_RS00760)	CAETHG_RS00760		Xanthosine utilisation (xap region)	1	-1000	1000	2.4.2.1	Phosphate + H+ + Adenosine <=> Adenine + Ribose 1-phosphate		0.00392298	0.00392298	0.00392298	0.00401866	0.0039469	4.14317e-05	0.00401866	0.00401866	0.00392298	0.00401866	0.00399474	4.14317e-05	0.00392298	0.00401866	0.00397082	4.78412e-05	0.00401866	0.00392298	0.00397082	4.78412e-05	0.00392298	0.00392298	0.00392298	0.00392298	0	0.00401866	0.00401866	0.00401866	0.00411435	0.00404258	4.14317e-05	0.00401866	0.00401866	0.00401866	0	0.00191365	0.00187538
rxn02305_c0	2-Methyl-4-amino-5-hydroxymethylpyrimidine-diphosphate:4-methyl-5- c0	S_cpd00067[c] + S_cpd02654[c] + S_cpd02894[c] <=> S_cpd00012[c] + S_cpd00793[c]	((CAETHG_RS16835) or (CAETHG_RS05775))	CAETHG_RS05775 CAETHG_RS16835		Thiamin biosynthesis	1	-1000	1000	2.5.1.3	H+ + 4-Methyl-5-2-phosphoethyl-thiazole + 4-Amino-2-methyl-5-diphosphomethylpyrimidine <=> PPi + Thiamine phosphate		9.13275e-06	9.13275e-06	9.13275e-06	9.3555e-06	9.18844e-06	9.64535e-08	9.3555e-06	9.3555e-06	9.13275e-06	9.3555e-06	9.29981e-06	9.64535e-08	9.13275e-06	9.3555e-06	9.24413e-06	1.11375e-07	9.3555e-06	9.13275e-06	9.24413e-06	1.11375e-07	9.13275e-06	9.13275e-06	9.13275e-06	9.13275e-06	0	9.3555e-06	9.3555e-06	9.3555e-06	9.57825e-06	9.41119e-06	9.64536e-08	9.3555e-06	9.3555e-06	9.3555e-06	0	4.455e-06	4.3659e-06
rxn05303_c0	ARGt2 c0	S_cpd00051[e] + S_cpd00067[e] -> S_cpd00051[c] + S_cpd00067[c]	((CAETHG_RS12545) or (CAETHG_RS14850) or (CAETHG_RS12540) or (CAETHG_RS01100))	CAETHG_RS01100 CAETHG_RS12540 CAETHG_RS12545 CAETHG_RS14850		Transport Reactions	0	0	0	proton	L-Arginine + H+ -> L-Arginine + H+		0	0	0	0	0	0	0	0	0	0	0	0	0	0	0	0	0	0	0	0	0	0	0	0	0	0	0	0	0	0	0	0	0	0	0	0	0
rxn05533_c0	Dipeptide transport via ABC system (ala-asp) c0	S_cpd00001[c] + S_cpd00002[c] + S_cpd11593[e] -> S_cpd00008[c] + S_cpd00009[c] + S_cpd00067[c] + S_cpd11593[c]	(CAETHG_RS07520)	CAETHG_RS07520		ABC transporter dipeptide (TC 3.A.1.5.2)	0	0	1000		H2O + ATP + ala-L-asp-L -> ADP + Phosphate + H+ + ala-L-asp-L		0	0	0	0	0	0	0	0	0	0	0	0	0	0	0	0	0	0	0	0	0	0	0	0	0	0	0	0	0	0	0	0	0	0	0	0	0
rxn10211_c0	palmitoyl-1-acylglycerol-3-phosphate O-acyltransferase c0	S_cpd00134[c] + S_cpd15327[c] -> S_cpd00010[c] + S_cpd15524[c]	((CAETHG_RS13530) or (CAETHG_RS08580))	CAETHG_RS08580 CAETHG_RS13530		Phosphate metabolism|Glycerolipid and Glycerophospholipid Metabolism in Bacteria	0	0	1000	2.3.1.51	Palmitoyl-CoA + 1-hexadecanoyl-sn-glycerol 3-phosphate -> CoA + 1,2-dihexadecanoyl-sn-glycerol 3-phosphate		0	0	0	0	0	0	0	0	0	0	0	0	0	0	0	0	0	0	0	0	0	0	0	0	0	0	0	0	0	0	0	0	0	0	0	0	0
rxn12641_c0	aminopeptidase c0	S_cpd00001[c] + S_cpd11585[c] <=> S_cpd00033[c] + S_cpd00035[c]	(((CAETHG_RS04585) or (CAETHG_RS15660)) or (CAETHG_RS03545) or (CAETHG_RS07155))	CAETHG_RS03545 CAETHG_RS04585 CAETHG_RS07155 CAETHG_RS15660		Recycling of Peptidoglycan Amino Acids|Protein degradation	1	-1000	1000		H2O + L-alanylglycine <=> Glycine + L-Alanine		0	0	0	0	0	0	0	0	0	0	0	0	0	0	0	0	0	0	0	0	0	0	0	0	0	0	0	0	0	0	0	0	0	0	0	0	0
rxn10315_c0	isohexadecanoyl-lipoteichoic acid synthesis (n-24), linked, N-acetylglucosamine substituted c0	24 S_cpd00037[c] + S_cpd15754[c] <=> 24 S_cpd00014[c] + S_cpd15772[c]	(CAETHG_RS11510)	CAETHG_RS11510		Teichoic and lipoteichoic acids biosynthesis|Methicillin resistance in Staphylococci|Teichuronic acid biosynthesis	1	-1000	1000	2.7.8.-	24 UDP-N-acetylglucosamine + Isohexadecanoyllipoteichoic acid (n-24), linked, unsubstituted <=> 24 UDP + Isohexadecanoyllipoteichoic acid (n-24), linked, N-acetyl-D-glucosamine		0	0	0	0	0	0	0	0	0	0	0	0	0	0	0	0	0	0	0	0	0	0	0	0	0	0	0	0	0	0	0	0	0	0	0	0	0
rxn10205_c0	isoheptadecanoyl-glycerol-3-phosphate O-acyltransferase c0	S_cpd00080[c] + S_cpd11432[c] -> S_cpd00010[c] + S_cpd15671[c]	(() and (CAETHG_RS16510))	CAETHG_RS16510		Glycerolipid and Glycerophospholipid Metabolism in Bacteria	0	0	1000	2.3.1.15	Glycerol-3-phosphate + fa11coa -> CoA + 1-isoheptadecanoyl-sn-glycerol 3-phosphate		0	0	0	0	0	0	0	0	0	0	0	0	0	0	0	0	0	0	0	0	0	0	0	0	0	0	0	0	0	0	0	0	0	0	0	0	0
rxn00239_c0	ATP:(d)GMP phosphotransferase c0	S_cpd00002[c] + S_cpd00126[c] <=> S_cpd00008[c] + S_cpd00031[c]	(CAETHG_RS16375)	CAETHG_RS16375		MLST|Purine conversions	1	-1000	1000	2.7.4.8	ATP + GMP <=> ADP + GDP		0.00532893	0.00532893	0.00532893	0.0054589	0.00536142	5.62803e-05	0.0054589	0.0054589	0.00532893	0.0054589	0.00542641	5.62803e-05	0.00532893	0.0054589	0.00539392	6.4987e-05	0.0054589	0.00532893	0.00539392	6.4987e-05	0.00532893	0.00532893	0.00532893	0.00532893	0	0.0054589	0.0054589	0.0054589	0.00558888	0.0054914	5.62803e-05	0.0054589	0.0054589	0.0054589	0	0.00259948	0.00254749
rxn00612_c0	sn-Glycerol-3-phosphate:NADP+ 2-oxidoreductase c0	S_cpd00006[c] + S_cpd00080[c] <=> S_cpd00005[c] + S_cpd00067[c] + S_cpd00095[c]	(CAETHG_RS16355)	CAETHG_RS16355		NADP Metabolism	1	-1000	0	1.1.1.261,1.1.1.94	NADP + Glycerol-3-phosphate <=> NADPH + H+ + Glycerone-phosphate		0	0	0	0	0	0	0	0	0	0	0	0	0	0	0	0	0	0	0	0	0	0	0	0	0	0	0	0	0	0	0	0	0	0	0	0	0
rxn05418_c0	8-methyl-3-oxo-nonanoyl-ACP:NADP+ oxidoreductase c0	S_cpd00005[c] + S_cpd00067[c] + S_cpd11554[c] <=> S_cpd00006[c] + S_cpd11555[c]	((CAETHG_RS08435) or (CAETHG_RS00375) or (CAETHG_RS00860) or (CAETHG_RS04365) or (CAETHG_RS06705) or (CAETHG_RS03500) or (CAETHG_RS04680) or (CAETHG_RS09990))	CAETHG_RS00375 CAETHG_RS00860 CAETHG_RS03500 CAETHG_RS04365 CAETHG_RS04680 CAETHG_RS06705 CAETHG_RS08435 CAETHG_RS09990		mycolic acid synthesis|Fatty Acid Biosynthesis FASII	1	-1000	1000	1.1.1.0	NADPH + H+ + 8-methyl-3-oxo-nonanoyl-ACP <=> NADP + 8-methyl-3-hydroxy-nonanoyl-ACP		0	0	0	0	0	0	0	0	0	0	0	0	0	0	0	0	0	0	0	0	0	0	0	0	0	0	0	0	0	0	0	0	0	0	0	0	0
rxn00711_c0	UMP:pyrophosphate phosphoribosyltransferase c0	S_cpd00092[c] + S_cpd00103[c] -> S_cpd00012[c] + S_cpd00091[c]	(((CAETHG_RS15545) or (CAETHG_RS11500)) and (CAETHG_RS15545))	CAETHG_RS11500 CAETHG_RS15545		Pyrimidine conversions	0	0	1000	2.4.2.9	Uracil + PRPP -> PPi + UMP		0	0	0	0	0	0	0	0	0	0	0	0	0	0	0	0	0	0	0	0	0	0	0	0	0	0	0	0	0	0	0	0	0	0	0	0	0
rxn10309_c0	stearoyl-lipoteichoic acid synthesis (n-24), linked, N-acetylglucosamine substituted c0	24 S_cpd00037[c] + S_cpd15748[c] <=> 24 S_cpd00014[c] + S_cpd15766[c]	(CAETHG_RS11510)	CAETHG_RS11510		Teichoic and lipoteichoic acids biosynthesis|Methicillin resistance in Staphylococci|Teichuronic acid biosynthesis	1	-1000	1000	2.7.8.-	24 UDP-N-acetylglucosamine + Stearoyllipoteichoic acid (n-24), linked, unsubstituted <=> 24 UDP + Stearoyllipoteichoic acid (n-24), linked, N-acetyl-D-glucosamine		0	0	0	0	0	0	0	0	0	0	0	0	0	0	0	0	0	0	0	0	0	0	0	0	0	0	0	0	0	0	0	0	0	0	0	0	0
rxn12633_c0	aminopeptidase c0	S_cpd00001[c] + S_cpd11593[c] <=> S_cpd00035[c] + S_cpd00041[c]	(((CAETHG_RS04585) or (CAETHG_RS15660)) or (CAETHG_RS03545) or (CAETHG_RS07155))	CAETHG_RS03545 CAETHG_RS04585 CAETHG_RS07155 CAETHG_RS15660		Recycling of Peptidoglycan Amino Acids|Protein degradation	1	-1000	1000		H2O + ala-L-asp-L <=> L-Alanine + L-Aspartate		0	0	0	0	0	0	0	0	0	0	0	0	0	0	0	0	0	0	0	0	0	0	0	0	0	0	0	0	0	0	0	0	0	0	0	0	0
rxn04113_c0	isopentenyl-diphosphate:NAD(P)+ oxidoreductase c0	S_cpd00005[c] + S_cpd00067[c] + S_cpd08615[c] -> S_cpd00001[c] + S_cpd00006[c] + S_cpd00113[c]	(CAETHG_RS01035)	CAETHG_RS01035		Methylerythritol Phosphate Pathway	0	0	1000	1.17.1.2	NADPH + H+ + 1-Hydroxy-2-methyl-2-butenyl 4-diphosphate -> H2O + NADP + Isopentenyldiphosphate		0	0	0	0	0	0	0	0	0	0	0	0	0	0	0	0	0	0	0	0	0	0	0	0	0	0	0	0	0	0	0	0	0	0	0	0	0
rxn05250_c0	FACOAL160(ISO) c0	S_cpd00002[c] + S_cpd00010[c] + S_cpd00067[c] + S_cpd11440[c] -> S_cpd00012[c] + S_cpd00018[c] + S_cpd11441[c]	(CAETHG_RS08635)	CAETHG_RS08635		Fatty acid degradation regulons|Unsaturated Fatty Acid Metabolism|Carbonate Biomineralization|n-Phenylalkanoic acid degradation|Biotin biosynthesis	0	0	1000	6.2.1.3	ATP + CoA + H+ + fa6 -> PPi + AMP + fa6coa		0	0	0	0	0	0	0	0	0	0	0	0	0	0	0	0	0	0	0	0	0	0	0	0	0	0	0	0	0	0	0	0	0	0	0	0	0
rxn06023_c0	CoA:apo-[acyl-carrier-protein] pantetheinephosphotransferase c0	S_cpd00010[c] + S_cpd12370[c] <=> S_cpd00045[c] + S_cpd11493[c]	(CAETHG_RS11895)	CAETHG_RS11895		Fatty Acid Biosynthesis FASII	1	-1000	1000	2.7.8.7	CoA + apo-ACP <=> Adenosine 3-5-bisphosphate + ACP		0	0	0	0	0	0	0	0	0	0	0	0	0	0	0	0	0	0	0	0	0	0	0	0	0	0	0	0	0	0	0	0	0	0	0	0	0
rxn00422_c0	L-Serine:pyruvate aminotransferase c0	S_cpd00020[c] + S_cpd00054[c] <=> S_cpd00035[c] + S_cpd00145[c]	(() and ((CAETHG_RS10930) or (CAETHG_RS10845)))	CAETHG_RS10845 CAETHG_RS10930		Serine-glyoxylate cycle	1	-1000	1000	2.6.1.51	Pyruvate + L-Serine <=> L-Alanine + Hydroxypyruvate		0	0	0	0	0	0	0	0	0	0	0	0	0	0	0	0	0	0	0	0	0	0	0	0	0	0	0	0	0	0	0	0	0	0	0	0	0
rxn05526_c0	chromate transport out via proton antiport c0	S_cpd00067[e] + S_cpd11595[c] <=> S_cpd00067[c] + S_cpd11595[e]	((CAETHG_RS07330) or (CAETHG_RS07325))	CAETHG_RS07325 CAETHG_RS07330			1	-1000	1000		H+ + chromate <=> H+ + chromate		0	0	0	0	0	0	0	0	0	0	0	0	0	0	0	0	0	0	0	0	0	0	0	0	0	0	0	0	0	0	0	0	0	0	0	0	0
rxn03174_c0	2-Amino-4-hydroxy-6-(erythro-1,2,3-trihydroxypropyl) c0	S_cpd03666[c] -> S_cpd00001[c] + S_cpd02978[c]	(CAETHG_RS13405)	CAETHG_RS13405		Pterin metabolism|Methanopterin biosynthesis2|tRNA modification Archaea Henri|Folate Biosynthesis|Queuosine-Archaeosine Biosynthesis|Folate Biosynthesis (Phoenix Copy)|Zinc regulated enzymes|Pterin metabolism 3	0	0	1000	3.5.4.16	2,5-Diamino-6-(5-triphosphoryl-3,4-trihydroxy-2-oxopentyl)- amino-4-oxopyrimidine -> H2O + 7,8-Dihydroneopterin 3-triphosphate		0	0	0	0	0	0	0	0	0	0	0	0	0	0	0	0	0	0	0	0	0	0	0	0	0	0	0	0	0	0	0	0	0	0	0	0	0
rxn00146_c0	(R)-Lactate:ferricytochrome-c 2-oxidoreductase c0	2 S_cpd00109[c] + S_cpd00221[c] <=> S_cpd00020[c] + 2 S_cpd00067[c] + 2 S_cpd00110[c]	(CAETHG_RS05500)	CAETHG_RS05500		Fermentations: Lactate|Lactate utilisation|Respiratory dehydrogenases 1|Fermentations: Mixed acid	1	-1000	1000	1.1.2.4,1.1.2.5	2 Cytochrome c3+ + D-Lactate <=> Pyruvate + 2 H+ + 2 Cytochrome c2+		0	0	0	0	0	0	0	0	0	0	0	0	0	0	0	0	0	0	0	0	0	0	0	0	0	0	0	0	0	0	0	0	0	0	0	0	0
rxn00763_c0	Glycerol:NAD+ oxidoreductase c0	S_cpd00003[c] + S_cpd00100[c] <=> S_cpd00004[c] + S_cpd00067[c] + S_cpd00448[c]	((CAETHG_RS17700) or (CAETHG_RS12040) or (CAETHG_RS07215) or (CAETHG_RS05150) or (CAETHG_RS18400) or (CAETHG_RS18395))	CAETHG_RS05150 CAETHG_RS07215 CAETHG_RS12040 CAETHG_RS17700 CAETHG_RS18395 CAETHG_RS18400		Fermentations: Lactate|Acetone Butanol Ethanol Synthesis|Glycerolipid and Glycerophospholipid Metabolism in Bacteria|Fermentations: Mixed acid	1	-1000	1000	1.1.1.1,1.1.1.2,1.1.1.21,1.1.1.72	NAD + Glycerol <=> NADH + H+ + D-Glyceraldehyde		0	0	0	0	0	0	0	0	0	0	0	0	0	0	0	0	0	0	0	0	0	0	0	0	0	0	0	0	0	0	0	0	0	0	0	0	0
rxn10174_c0	maltohexaose transport via ABC system c0	S_cpd00001[c] + S_cpd00002[c] + S_cpd01329[e] -> S_cpd00008[c] + S_cpd00009[c] + S_cpd00067[c] + S_cpd01329[c]	(CAETHG_RS06295)	CAETHG_RS06295		Maltose and Maltodextrin utilisation	0	0	1000		H2O + ATP + Maltohexaose -> ADP + Phosphate + H+ + Maltohexaose		0	0	0	0	0	0	0	0	0	0	0	0	0	0	0	0	0	0	0	0	0	0	0	0	0	0	0	0	0	0	0	0	0	0	0	0	0
rxn05393_c0	9-methyl-3-oxo-decanoyl-ACP:NADP+ oxidoreductase c0	S_cpd00005[c] + S_cpd00067[c] + S_cpd11529[c] <=> S_cpd00006[c] + S_cpd11530[c]	((CAETHG_RS08435) or (CAETHG_RS00375) or (CAETHG_RS00860) or (CAETHG_RS04365) or (CAETHG_RS06705) or (CAETHG_RS03500) or (CAETHG_RS04680) or (CAETHG_RS09990))	CAETHG_RS00375 CAETHG_RS00860 CAETHG_RS03500 CAETHG_RS04365 CAETHG_RS04680 CAETHG_RS06705 CAETHG_RS08435 CAETHG_RS09990		mycolic acid synthesis|Fatty Acid Biosynthesis FASII	1	-1000	1000	1.1.1.0	NADPH + H+ + 9-methyl-3-oxo-decanoyl-ACP <=> NADP + 9-methyl-3-hydroxy-decanoyl-ACP		0	0	0	0	0	0	0	0	0	0	0	0	0	0	0	0	0	0	0	0	0	0	0	0	0	0	0	0	0	0	0	0	0	0	0	0	0
rxn00138_c0	Deamino-NAD+:ammonia ligase (AMP-forming) c0	S_cpd00002[c] + S_cpd00013[c] + S_cpd00638[c] -> S_cpd00003[c] + S_cpd00012[c] + S_cpd00018[c]	(CAETHG_RS13685)	CAETHG_RS13685		NAD and NADP cofactor biosynthesis global|NAD regulation	0	0	1000	6.3.1.5	ATP + NH3 + Deamido-NAD -> NAD + PPi + AMP		3.6328e-05	3.63281e-05	3.6328e-05	3.72141e-05	3.65496e-05	3.83671e-07	3.72141e-05	3.72141e-05	3.63281e-05	3.72141e-05	3.69926e-05	3.83671e-07	3.6328e-05	3.72141e-05	3.67711e-05	4.43025e-07	3.72141e-05	3.6328e-05	3.67711e-05	4.43025e-07	3.6328e-05	3.63281e-05	3.63281e-05	3.6328e-05	8.0109e-15	3.72141e-05	3.72141e-05	3.72141e-05	3.81001e-05	3.74356e-05	3.83671e-07	3.72141e-05	3.72141e-05	3.72141e-05	1.42116e-14	1.7721e-05	1.73666e-05
rxn10298_c0	palmitoyl-lipoteichoic acid synthesis (n-24), linked, glucose substituted c0	24 S_cpd00026[c] + S_cpd15746[c] <=> 24 S_cpd00014[c] + S_cpd15755[c]	(CAETHG_RS06265)	CAETHG_RS06265		Teichoic and lipoteichoic acids biosynthesis	1	-1000	1000	2.4.1.52	24 UDP-glucose + Palmitoyllipoteichoic acid (n-24), linked, unsubstituted <=> 24 UDP + Palmitoyllipoteichoic acid (n-24), linked, glucose substituted		0	0	0	0	0	0	0	0	0	0	0	0	0	0	0	0	0	0	0	0	0	0	0	0	0	0	0	0	0	0	0	0	0	0	0	0	0
rxn03136_c0	1-(5'-Phosphoribosyl)-5-amino-4-(N-succinocarboxamide)-imidazole c0	S_cpd02921[c] <=> S_cpd00106[c] + S_cpd02851[c]	(CAETHG_RS16795)	CAETHG_RS16795		De Novo Purine Biosynthesis|Purine conversions	1	-1000	1000	4.3.2.2	SAICAR <=> Fumarate + AICAR		0.00877774	0.00877774	0.00877774	0.00899183	0.00883126	9.27042e-05	0.00899183	0.00899183	0.00877774	0.00899183	0.0089383	9.27042e-05	0.00877774	0.00899183	0.00888478	0.000107046	0.00899183	0.00877774	0.00888478	0.000107046	0.00877774	0.00877774	0.00877774	0.00877774	1.07185e-13	0.00899183	0.00899183	0.00899183	0.00920592	0.00904535	9.27042e-05	0.00899183	0.00899183	0.00899183	0	0.00428182	0.00419619
rxn01137_c0	Adenosine aminohydrolase c0	S_cpd00001[c] + S_cpd00067[c] + S_cpd00182[c] -> S_cpd00013[c] + S_cpd00246[c]	(CAETHG_RS03915)	CAETHG_RS03915		Purine conversions|Menaqui Biosynthesis via Futalosine	0	0	1000	3.5.4.4	H2O + H+ + Adenosine -> NH3 + Inosine		0	0	0	0	0	0	0	0	0	0	0	0	0	0	0	0	0	0	0	0	0	0	0	0	0	0	0	0	0	0	0	0	0	0	0	0	0
rxn08194_c0	cob(I)alamin adenosyltransferase c0	S_cpd00002[c] + S_cpd00635[c] <=> S_cpd00166[c] + S_cpd00421[c]	(CAETHG_RS05315)	CAETHG_RS05315		Coenzyme B12 biosynthesis	1	-1000	1000	2.5.1.17	ATP + Cbl <=> Calomide + Triphosphate		0	0	0	0	0	0	0	0	0	0	0	0	0	0	0	0	0	0	0	0	0	0	0	0	0	0	0	0	0	0	0	0	0	0	0	0	0
rxn00988_c0	Acetoacetate:CoA ligase (AMP-forming) c0	S_cpd00002[c] + S_cpd00010[c] + S_cpd00067[c] + S_cpd00142[c] -> S_cpd00012[c] + S_cpd00018[c] + S_cpd00279[c]	((CAETHG_RS08635) and ())	CAETHG_RS08635		Leucine Degradation and HMG-CoA Metabolism|Branched chain amino acid degradation regulons|Polyhydroxybutyrate metabolism|Pterin metabolism 3|HMG CoA Synthesis	0	0	1000	6.2.1.16	ATP + CoA + H+ + Acetoacetate -> PPi + AMP + Acetoacetyl-CoA		0	0	0	0	0	0	0	0	0	0	0	0	0	0	0	0	0	0	0	0	0	0	0	0	0	0	0	0	0	0	0	0	0	0	0	0	0
rxn05605_c0	L-malate transport in via proton symport c0	S_cpd00067[e] + S_cpd00130[e] <=> S_cpd00067[c] + S_cpd00130[c]	(CAETHG_RS03875)	CAETHG_RS03875		Transport Reactions	1	-1000	1000		H+ + L-Malate <=> H+ + L-Malate		0	0	0	0	0	0	0	0	0	0	0	0	0	0	0	0	0	0	0	0	0	0	0	0	0	0	0	0	0	0	0	0	0	0	0	0	0
rxn04082_c0	L-ribulose-5-phosphate 4-epimerase c0	S_cpd00808[c] <=> S_cpd00198[c]	(CAETHG_RS10970)	CAETHG_RS10970		Pentose Phosphate Pathway	1	-1000	1000	5.1.3.1	L-ribulose-5-phosphate <=> D-Xylulose5-phosphate		0	0	0	0	0	0	0	0	0	0	0	0	0	0	0	0	0	0	0	0	0	0	0	0	0	0	0	0	0	0	0	0	0	0	0	0	0
rxn05617_c0	mannitol transport via PEP:Pyr PTS c0	S_cpd00061[c] + S_cpd00314[e] <=> S_cpd00020[c] + S_cpd00491[c]	(() and () and (CAETHG_RS09185) and () and ())	CAETHG_RS09185		Mannitol utilisation	1	-1000	1000		Phosphoenolpyruvate + D-Mannitol <=> Pyruvate + D-mannitol-1-phosphate		0	0	0	0	0	0	0	0	0	0	0	0	0	0	0	0	0	0	0	0	0	0	0	0	0	0	0	0	0	0	0	0	0	0	0	0	0
rxn04996_c0	dimethyallyl diphosphate:NADP+ oxidoreductase c0	S_cpd00005[c] + S_cpd00067[c] + S_cpd08615[c] -> S_cpd00001[c] + S_cpd00006[c] + S_cpd00202[c]	(CAETHG_RS01035)	CAETHG_RS01035		Methylerythritol Phosphate Pathway	0	0	1000	1.17.1.2	NADPH + H+ + 1-Hydroxy-2-methyl-2-butenyl 4-diphosphate -> H2O + NADP + DMAPP		0	0	0	0	0	0	0	0	0	0	0	0	0	0	0	0	0	0	0	0	0	0	0	0	0	0	0	0	0	0	0	0	0	0	0	0	0
rxn05236_c0	Ribonucleotide reductase: UTP c0	S_cpd00062[c] + S_cpd11421[c] -> S_cpd00001[c] + S_cpd00358[c] + S_cpd11420[c]	(CAETHG_RS11260)	CAETHG_RS11260		Ribonucleotide reduction	0	0	1000	1.17.4.2	UTP + trdrd -> H2O + dUTP + trdox		0.0012092	0.0012092	0.0012092	0.00123869	0.00121657	1.27707e-05	0.00123869	0.00123869	0.0012092	0.00123869	0.00123132	1.27707e-05	0.0012092	0.00123869	0.00122394	1.47463e-05	0.00123869	0.0012092	0.00122394	1.47463e-05	0.0012092	0.0012092	0.0012092	0.0012092	5.93752e-16	0.00123869	0.00123869	0.00123869	0.00126818	0.00124606	1.27707e-05	0.00123869	0.00123869	0.00123869	0	0.000589853	0.000578056
rxn02835_c0	1-(5-phospho-D-ribosyl)-AMP 1,6-hydrolase c0	S_cpd00001[c] + S_cpd01777[c] <=> S_cpd02979[c]	((CAETHG_RS16035) and (CAETHG_RS16030))	CAETHG_RS16030 CAETHG_RS16035		Histidine Biosynthesis	1	-1000	1000	3.5.4.19	H2O + Phosphoribosyl-AMP <=> phosphoribosylformiminoaicar-phosphate		0.000822232	0.000822232	0.000822232	0.000842286	0.000827245	8.68382e-06	0.000842286	0.000842286	0.000822232	0.000842286	0.000837272	8.68382e-06	0.000822232	0.000842286	0.000832259	1.00272e-05	0.000842286	0.000822232	0.000832259	1.00272e-05	0.000822232	0.000822232	0.000822232	0.000822232	0	0.000842286	0.000842286	0.000842286	0.000862341	0.0008473	8.68382e-06	0.000842286	0.000842286	0.000842286	0	0.000401089	0.000393067
rxn02373_c0	L-Glutamate-5-semialdehyde:NADP+ 5-oxidoreductase (phosphorylationg) c0	S_cpd00006[c] + S_cpd00009[c] + S_cpd00858[c] <=> S_cpd00005[c] + S_cpd02097[c]	(CAETHG_RS13235)	CAETHG_RS13235		Proline biosynthesis	1	-1000	1000	1.2.1.41	NADP + Phosphate + L-Glutamate5-semialdehyde <=> NADPH + L-Glutamyl 5-phosphate		-0.0130905	-0.0130905	-0.0130905	-0.0134097	-0.0131703	0.000138252	-0.0134097	-0.0134097	-0.0130905	-0.0134097	-0.0133299	0.000138252	-0.0130905	-0.0134097	-0.0132501	0.00015964	-0.0134097	-0.0130905	-0.0132501	0.00015964	-0.0130905	-0.0130905	-0.0130905	-0.0130905	0	-0.0134097	-0.0134097	-0.0134097	-0.013729	-0.0134896	0.000138252	-0.0134097	-0.0134097	-0.0134097	0	-0.00638559	-0.00625788
rxn05581_c0	glycerol transport in/out via diffusion reversible c0	S_cpd00100[c] <=> S_cpd00100[e]	(CAETHG_RS16105)	CAETHG_RS16105		Osmoregulation|Glycerol fermenation to 1,3-propanediol|Dihydroxyacetone kinases|Glycerol and Glycerol-3-phosphate Uptake and utilisation	1	-1000	1000		Glycerol <=> Glycerol		0	0	0	0	0	0	0	0	0	0	0	0	0	0	0	0	0	0	0	0	0	0	0	0	0	0	0	0	0	0	0	0	0	0	0	0	0
rxn00726_c0	Chorismate pyruvate-lyase (amino-accepting) c0	S_cpd00013[c] + S_cpd00216[c] -> S_cpd00001[c] + S_cpd00020[c] + S_cpd00067[c] + S_cpd00093[c]	((CAETHG_RS18180) and (CAETHG_RS18175))	CAETHG_RS18175 CAETHG_RS18180		Tryptophan synthesis	0	0	1000	4.1.3.27	NH3 + Chorismate -> H2O + Pyruvate + H+ + Anthranilate		0.000931569	0.000931569	0.000931569	0.00095429	0.000937249	9.83857e-06	0.00095429	0.00095429	0.000931569	0.00095429	0.00094861	9.83857e-06	0.000931569	0.00095429	0.00094293	1.13606e-05	0.00095429	0.000931569	0.00094293	1.13606e-05	0.000931569	0.000931569	0.000931569	0.000931569	0	0.00095429	0.00095429	0.00095429	0.000977012	0.000959971	9.83857e-06	0.00095429	0.00095429	0.00095429	0	0.000454424	0.000445336
rxn05287_c0	GGTT c0	S_cpd00113[c] + S_cpd00289[c] -> S_cpd00012[c] + S_cpd02591[c]	((CAETHG_RS15870) or (CAETHG_RS09090))	CAETHG_RS09090 CAETHG_RS15870		Proteorhodopsin|Polyprenyl Diphosphate Biosynthesis	0	0	1000		Isopentenyldiphosphate + Geranylgeranyl diphosphate -> PPi + pendp		0	0	0	0	0	0	0	0	0	0	0	0	0	0	0	0	0	0	0	0	0	0	0	0	0	0	0	0	0	0	0	0	0	0	0	0	0
rxn05345_c0	dodecanoyl-[acyl-carrier-protein]:malonyl-[acyl-carrier-protein] c0	S_cpd00067[c] + S_cpd11468[c] + S_cpd11492[c] -> S_cpd00011[c] + S_cpd11491[c] + S_cpd11493[c]	((CAETHG_RS10005) and (CAETHG_RS09985))	CAETHG_RS09985 CAETHG_RS10005		Fatty Acid Biosynthesis FASII	0	0	1000	2.3.1.41,2.3.1.85,2.3.1.86,2.3.1.179,2.3.1.180	H+ + Dodecanoyl-ACP + Malonyl-acyl-carrierprotein -> CO2 + 3-oxotetradecanoyl-acp + ACP		0	0	0	0	0	0	0	0	0	0	0	0	0	0	0	0	0	0	0	0	0	0	0	0	0	0	0	0	0	0	0	0	0	0	0	0	0
rxn02177_c0	Isochorismate pyruvate-hydrolase c0	S_cpd00001[c] + S_cpd00658[c] -> S_cpd00020[c] + S_cpd02566[c]	(CAETHG_RS03300)	CAETHG_RS03300		Siderophore_enterobactin_biosynthesis_and_ferric_enterbactin_transport|NAD_and_NADP_cofactor_biosynthesis_global|Chorismate:_Intermediate_for_synthesis_of_PAPA_antibiotics,_PABA,_anthranilate,_3-hydroxyanthranilate_and_more.	0	0	1000	3.3.2.1	H2O + Isochorismate -> Pyruvate + 2,3-Dihydroxy-2,3-dihydrobenzoate		0	0	0	0	0	0	0	0	0	0	0	0	0	0	0	0	0	0	0	0	0	0	0	0	0	0	0	0	0	0	0	0	0	0	0	0	0
rxn10218_c0	anteisopentadecanoyl-1-acylglycerol-3-phosphate O-acyltransferase c0	S_cpd11439[c] + S_cpd15675[c] -> S_cpd00010[c] + S_cpd15681[c]	((CAETHG_RS13530) or (CAETHG_RS08580))	CAETHG_RS08580 CAETHG_RS13530		Phosphate metabolism|Glycerolipid and Glycerophospholipid Metabolism in Bacteria	0	0	1000	2.3.1.51	fa4coa + 1-anteisopentadecanoyl-sn-glycerol 3-phosphate -> CoA + 1,2-dianteisopentadecanoyl-sn-glycerol 3-phosphate		0	0	0	0	0	0	0	0	0	0	0	0	0	0	0	0	0	0	0	0	0	0	0	0	0	0	0	0	0	0	0	0	0	0	0	0	0
rxn03147_c0	1-(5-Phosphoribosyl)-5-amino-4-carboxyimidazole:L-aspartate ligase c0	S_cpd00002[c] + S_cpd00041[c] + S_cpd02893[c] -> S_cpd00008[c] + S_cpd00009[c] + 2 S_cpd00067[c] + S_cpd02921[c]	(CAETHG_RS14495)	CAETHG_RS14495		De Novo Purine Biosynthesis	0	0	1000	6.3.2.6	ATP + L-Aspartate + 5-Phosphoribosyl-4-carboxy-5-aminoimidazole -> ADP + Phosphate + 2 H+ + SAICAR		0.00877774	0.00877774	0.00877774	0.00899183	0.00883126	9.27042e-05	0.00899183	0.00899183	0.00877774	0.00899183	0.0089383	9.27042e-05	0.00877774	0.00899183	0.00888478	0.000107046	0.00899183	0.00877774	0.00888478	0.000107046	0.00877774	0.00877774	0.00877774	0.00877774	8.64005e-14	0.00899183	0.00899183	0.00899183	0.00920592	0.00904535	9.27042e-05	0.00899183	0.00899183	0.00899183	1.42109e-14	0.00428182	0.00419619
rxn01211_c0	5,10-Methenyltetrahydrofolate 5-hydrolase(decyclizing) c0	S_cpd00001[c] + S_cpd00347[c] <=> S_cpd00067[c] + S_cpd00201[c]	(((CAETHG_RS07840) and (CAETHG_RS07840)) or (CAETHG_RS07850))	CAETHG_RS07840 CAETHG_RS07850		Wood-Ljungdahl Pathway	1	-1000	1000	3.5.4.9	H2O + 5-10-Methenyltetrahydrofolate <=> H+ + 10-Formyltetrahydrofolate		-4.97485	-4.91409	-4.61413	-5.04856	-4.88791	0.165082	-6.4168	-6.4584	-6.52857	-6.20156	-6.40133	0.12206	-8.19883	-7.73775	-7.96829	0.230541	-8.69718	-8.39597	-8.54657	0.150609	-10.3222	-10.2329	-10.6524	-10.4025	0.180416	-10.2758	-9.77201	-11.0836	-10.2894	-10.3552	0.469377	-21.2305	-24.9209	-23.0757	1.84522	-9.84861	-10.2808
rxn03884_c0	2-dehydro-3-deoxy-D-gluconate-6-phosphate c0	S_cpd02711[c] <=> S_cpd00020[c] + S_cpd00102[c]	(((CAETHG_RS15975) or (CAETHG_RS16910)) and ((CAETHG_RS15975) or (CAETHG_RS16910)))	CAETHG_RS15975 CAETHG_RS16910		Proline, 4-hydroxyproline uptake and utilisation|Glyoxylate bypass	1	-1000	1000	4.1.2.14	2-Keto-3-deoxy-6-phosphogluconate <=> Pyruvate + Glyceraldehyde3-phosphate		0	0	0	0	0	0	0	0	0	0	0	0	0	0	0	0	0	0	0	0	0	0	0	0	0	0	0	0	0	0	0	0	0	0	0	0	0
rxn01602_c0	Dihydrofolate:NADP+ oxidoreductase c0	S_cpd00006[c] + S_cpd00330[c] <=> S_cpd00005[c] + S_cpd00067[c] + S_cpd00393[c]	(CAETHG_RS02425)	CAETHG_RS02425		Folate Biosynthesis|Folate Biosynthesis (Phoenix Copy)	1	-1000	1000	1.5.1.3	NADP + Dihydrofolate <=> NADPH + H+ + Folate		0	0	0	0	0	0	0	0	0	0	0	0	0	0	0	0	0	0	0	0	0	0	0	0	0	0	0	0	0	0	0	0	0	0	0	0	0
rxn00670_c0	acetyl-CoA:phosphate acetyltransferase c0	S_cpd00009[c] + S_cpd00067[c] + S_cpd00086[c] <=> S_cpd00010[c] + S_cpd01844[c]	(CAETHG_RS16490)	CAETHG_RS16490		Propanediol utilisation|Fermentations: Lactate|Ethanolamine utilisation|MLST|C jejuni colonization of chick caeca|Pyruvate metabolism II: acetyl-CoA, acetogenesis from pyruvate|Fermentations: Mixed acid|Threonine anaerobic catabolism gene cluster|Acetyl-CoA pathway of CO2 fixation	1	-1000	1000	2.3.1.8	Phosphate + H+ + Propionyl-CoA <=> CoA + Propionyl phosphate		0	0	0	0	0	0	0	0	0	0	0	0	0	0	0	0	0	0	0	0	0	0	0	0	0	0	0	0	0	0	0	0	0	0	0	0	0
rxn10335_c0	myristoyl-cardiolipin synthase c0	2 S_cpd15536[c] <=> S_cpd00100[c] + S_cpd15792[c]	((CAETHG_RS14670) or (CAETHG_RS04280))	CAETHG_RS04280 CAETHG_RS14670		Glycerolipid and Glycerophospholipid Metabolism in Bacteria	1	-1000	1000		2 Phosphatidylglycerol ditetradecanoyl <=> Glycerol + Myristoylcardiolipin (B. subtilis)		0	0	0	0	0	0	0	0	0	0	0	0	0	0	0	0	0	0	0	0	0	0	0	0	0	0	0	0	0	0	0	0	0	0	0	0	0
rxn00184_c0	L-Glutamate:NADP+ oxidoreductase (deaminating) c0	S_cpd00001[c] + S_cpd00006[c] + S_cpd00023[c] <=> S_cpd00005[c] + S_cpd00013[c] + S_cpd00024[c] + S_cpd00067[c]	(CAETHG_RS11665)	CAETHG_RS11665		Glutamate metabolism	1	-1000	1000	1.4.1.3,1.4.1.4	H2O + NADP + L-Glutamate <=> NADPH + NH3 + 2-Oxoglutarate + H+		-0.270881	-0.280501	-0.295521	-0.286723	-0.283407	0.00898736	-0.295843	-0.271643	-0.317741	-0.278223	-0.290863	0.0178634	-0.181824	-0.186259	-0.184042	0.00221737	-0.186259	-0.181824	-0.184042	0.00221737	-0.284541	-0.181824	-0.25193	-0.239432	0.0428552	-0.285323	-0.223878	-0.186928	-0.203277	-0.224852	0.0372873	-0.262683	-0.306028	-0.284356	0.0216727	-0.13404	-0.130559
rxn00650_c0	membrane alanyl aminopeptidase c0	S_cpd00001[c] + S_cpd01017[c] <=> S_cpd00033[c] + S_cpd00084[c]	(((CAETHG_RS04585) or (CAETHG_RS15660)) or (CAETHG_RS03545) or (CAETHG_RS07155))	CAETHG_RS03545 CAETHG_RS04585 CAETHG_RS07155 CAETHG_RS15660		Recycling of Peptidoglycan Amino Acids|Protein degradation	1	-1000	1000	3.4.11.2,3.4.11.1,3.4.11.23,3.4.13.3	H2O + Cys-Gly <=> Glycine + L-Cysteine		0	0	0	0	0	0	0	0	0	0	0	0	0	0	0	0	0	0	0	0	0	0	0	0	0	0	0	0	0	0	0	0	0	0	0	0	0
rxn01241_c0	Dihydrolipoamide:NAD+ oxidoreductase c0	S_cpd00003[c] + S_cpd00449[c] <=> S_cpd00004[c] + S_cpd00067[c] + S_cpd00213[c]	(CAETHG_RS07825)	CAETHG_RS07825		E3	1	-1000	1000	1.8.1.4	NAD + Dihydrolipoamide <=> NADH + H+ + Lipoamide		0	0	0	0	0	0	0	0	0	0	0	0	0	0	0	0	0	0	0	0	0	0	0	0	0	0	0	0	0	0	0	0	0	0	0	0	0
rxn10229_c0	isopentadecanoyl-CDPdiacylglycerol-serine O-phosphatidyltransferase c0	S_cpd00054[c] + S_cpd15686[c] -> S_cpd00046[c] + S_cpd00067[c] + S_cpd15692[c]	(CAETHG_RS11850)	CAETHG_RS11850		Glycerolipid and Glycerophospholipid Metabolism in Bacteria	0	0	1000	2.7.8.8	L-Serine + CDP-1,2-diisopentadecanoylglycerol -> CMP + H+ + Diisopentadecanoylphosphatidylserine		0	0	0	0	0	0	0	0	0	0	0	0	0	0	0	0	0	0	0	0	0	0	0	0	0	0	0	0	0	0	0	0	0	0	0	0	0
rxn01522_c0	xanthine:NAD+ oxidoreductase c0	S_cpd00001[c] + S_cpd00003[c] + S_cpd00309[c] -> S_cpd00004[c] + S_cpd00067[c] + S_cpd00300[c]	(((CAETHG_RS02025) or (CAETHG_RS04725)) and ((CAETHG_RS04735) or (CAETHG_RS02015) or (CAETHG_RS02245) or (CAETHG_RS02175) or (CAETHG_RS02170)) and ((CAETHG_RS02165) or (CAETHG_RS04730) or (CAETHG_RS02245)))	CAETHG_RS02015 CAETHG_RS02025 CAETHG_RS02165 CAETHG_RS02170 CAETHG_RS02175 CAETHG_RS02245 CAETHG_RS04725 CAETHG_RS04730 CAETHG_RS04735		Purine utilisation	0	0	1000	1.17.1.4,1.1.1.204	H2O + NAD + XAN -> NADH + H+ + Urate		0	0	0	0	0	0	0	0	0	0	0	0	0	0	0	0	0	0	0	0	0	0	0	0	0	0	0	0	0	0	0	0	0	0	0	0	0
rxn08300_c0	diacylglycerol kinase (n-C18:1) c0	S_cpd00002[c] + S_cpd15312[c] <=> S_cpd00008[c] + S_cpd15527[c]	(CAETHG_RS14270)	CAETHG_RS14270		Glycerolipid and Glycerophospholipid Metabolism in Bacteria	1	-1000	1000	2.7.1.107	ATP + 1,2-Diacyl-sn-glycerol dioctadec-11-enoyl <=> ADP + 1,2-dioctadec-11-enoyl-sn-glycerol 3-phosphate		0	0	0	0	0	0	0	0	0	0	0	0	0	0	0	0	0	0	0	0	0	0	0	0	0	0	0	0	0	0	0	0	0	0	0	0	0
rxn00836_c0	IMP:pyrophosphate phosphoribosyltransferase c0	S_cpd00103[c] + S_cpd00226[c] -> S_cpd00012[c] + S_cpd00114[c]	((CAETHG_RS06200) or (CAETHG_RS09690))	CAETHG_RS06200 CAETHG_RS09690		Purine conversions	0	0	1000	2.4.2.8	PRPP + HYXN -> PPi + IMP		0	0	0	0	0	0	0	0	0	0	0	0	0	0	0	0	0	0	0	0	0	0	0	0	0	0	0	0	0	0	0	0	0	0	0	0	0
rxn00776_c0	Uracil hydro-lyase (adding D-ribose 5-phosphate) c0	S_cpd00092[c] + S_cpd00101[c] -> S_cpd00001[c] + S_cpd00859[c]	(((CAETHG_RS09280) and (CAETHG_RS16700)) or (() and () and (CAETHG_RS07575) and (CAETHG_RS15535) and (CAETHG_RS01055) and (CAETHG_RS18875)))	CAETHG_RS01055 CAETHG_RS07575 CAETHG_RS09280 CAETHG_RS15535 CAETHG_RS16700 CAETHG_RS18875		Ribosome biogenesis bacterial|tRNA modification Bacteria|rRNA modification Bacteria	0	0	1000	4.2.1.70	Uracil + ribose-5-phosphate -> H2O + Pseudouridine 5-phosphate		0	0	0	0	0	0	0	0	0	0	0	0	0	0	0	0	0	0	0	0	0	0	0	0	0	0	0	0	0	0	0	0	0	0	0	0	0
rxn09110_c0	Phosphatidylglycerol synthase (n-C14:1) c0	S_cpd00080[c] + S_cpd15422[c] <=> S_cpd00046[c] + S_cpd15544[c]	((CAETHG_RS16745) or (CAETHG_RS06675))	CAETHG_RS06675 CAETHG_RS16745		Glycerolipid and Glycerophospholipid Metabolism in Bacteria	1	-1000	1000	2.7.8.5	Glycerol-3-phosphate + CDP-1,2-ditetradec-7-enoylglycerol <=> CMP + Phosphatidylglycerophosphate ditetradec-7-enoyl		0	0	0	0	0	0	0	0	0	0	0	0	0	0	0	0	0	0	0	0	0	0	0	0	0	0	0	0	0	0	0	0	0	0	0	0	0
rxn12646_c0	aminopeptidase c0	S_cpd00001[c] + S_cpd11580[c] <=> S_cpd00033[c] + S_cpd00053[c]	(((CAETHG_RS04585) or (CAETHG_RS15660)) or (CAETHG_RS03545) or (CAETHG_RS07155))	CAETHG_RS03545 CAETHG_RS04585 CAETHG_RS07155 CAETHG_RS15660		Recycling of Peptidoglycan Amino Acids|Protein degradation	1	-1000	1000		H2O + Gly-Gln <=> Glycine + L-Glutamine		0	0	0	0	0	0	0	0	0	0	0	0	0	0	0	0	0	0	0	0	0	0	0	0	0	0	0	0	0	0	0	0	0	0	0	0	0
rxn09296_c0	hydrogen peroxide reductase (thioredoxin) c0	S_cpd00025[c] + S_cpd11421[c] -> 2 S_cpd00001[c] + S_cpd11420[c]	(CAETHG_RS09170)	CAETHG_RS09170		Glycine reductase, sarcosine reductase and betaine reductase	0	0	1000		H2O2 + trdrd -> 2 H2O + trdox		0	0	0	0	0	0	0	0	0	0	0	0	0	0	0	0	0	0	0	0	0	0	0	0	0	0	0	0	0	0	0	0	0	0	0	0	0
rxn01255_c0	5-O-(1-Carboxyvinyl)-3-phosphoshikimate phosphate-lyase c0	S_cpd00932[c] -> S_cpd00009[c] + S_cpd00067[c] + S_cpd00216[c]	(CAETHG_RS04330)	CAETHG_RS04330		Chorismate synthesis	0	0	1000	4.2.3.5	5-O-1-Carboxyvinyl-3-phosphoshikimate -> Phosphate + H+ + Chorismate		0.00573255	0.00573255	0.00573255	0.00587236	0.0057675	6.05431e-05	0.00587236	0.00587236	0.00573255	0.00587236	0.00583741	6.05431e-05	0.00573255	0.00587236	0.00580246	6.99091e-05	0.00587236	0.00573255	0.00580246	6.99091e-05	0.00573255	0.00573255	0.00573255	0.00573255	0	0.00587236	0.00587236	0.00587236	0.00601218	0.00590732	6.05431e-05	0.00587236	0.00587236	0.00587236	0	0.00279636	0.00274044
rxn03194_c0	(S)-2-Aceto-2-hydroxybutanoate pyruvate-lyase (carboxylating) c0	S_cpd00094[c] + S_cpd03049[c] <=> S_cpd00056[c] + S_cpd00498[c]	(((CAETHG_RS00590) or (CAETHG_RS01930)) and (CAETHG_RS00595))	CAETHG_RS00590 CAETHG_RS00595 CAETHG_RS01930		Isoleucine Biosynthesis	1	-1000	1000	2.2.1.6	2-Oxobutyrate + 2-Hydroxyethyl-ThPP <=> TPP + 2-Aceto-2-hydroxybutanoate		0.00708964	0.00708964	0.00708964	0.00726256	0.00713287	7.48757e-05	0.00726256	0.00726256	0.00708964	0.00726256	0.00721933	7.48757e-05	0.00708964	0.00726256	0.0071761	8.6459e-05	0.00726256	0.00708964	0.0071761	8.6459e-05	0.00708964	0.00708964	0.00708964	0.00708964	0	0.00726256	0.00726256	0.00726256	0.00743548	0.00730579	7.48757e-05	0.00726256	0.00726256	0.00726256	0	0.00345836	0.00338919
rxn08552_c0	glycerol-3-phosphate acyltransferase (C18:1) c0	S_cpd00080[c] + S_cpd11825[c] -> S_cpd11493[c] + S_cpd15328[c]	(() and (CAETHG_RS16510))	CAETHG_RS16510		Glycerolipid and Glycerophospholipid Metabolism in Bacteria	0	0	1000	2.3.1.15	Glycerol-3-phosphate + Octadecenoyl-ACP -> ACP + 1-octadec-11-enoyl-sn-glycerol 3-phosphate		0	0	0	0	0	0	0	0	0	0	0	0	0	0	0	0	0	0	0	0	0	0	0	0	0	0	0	0	0	0	0	0	0	0	0	0	0
rxn03958_c0	1-Deoxy-D-xylulose-5-phosphate isomeroreductase c0	S_cpd00006[c] + S_cpd08286[c] <=> S_cpd00005[c] + S_cpd00067[c] + S_cpd08289[c]	(CAETHG_RS16650)	CAETHG_RS16650		Methylerythritol Phosphate Pathway	1	-1000	1000	1.1.1.267	NADP + 2-C-methyl-D-erythritol4-phosphate <=> NADPH + H+ + 1-deoxy-D-xylulose5-phosphate		0	0	0	0	0	0	0	0	0	0	0	0	0	0	0	0	0	0	0	0	0	0	0	0	0	0	0	0	0	0	0	0	0	0	0	0	0
rxn10274_c0	isoheptadecanoyl-UDP-glucosyltransferase (diglucosyl) c0	S_cpd00026[c] + S_cpd15740[c] <=> S_cpd00014[c] + S_cpd15731[c]	(CAETHG_RS11420)	CAETHG_RS11420		Teichoic and lipoteichoic acids biosynthesis	1	-1000	1000		UDP-glucose + Monoglucosyl-1,2 diisoheptadecanoylglycerol <=> UDP + Diglucosyl-1,2 diisoheptadecanoylglycerol		0	0	0	0	0	0	0	0	0	0	0	0	0	0	0	0	0	0	0	0	0	0	0	0	0	0	0	0	0	0	0	0	0	0	0	0	0
rxn10236_c0	anteisopentadecanoyl-phosphatidylserine decarboxylase c0	2 S_cpd00067[c] + S_cpd15693[c] <=> S_cpd00011[c] + S_cpd15699[c]	(CAETHG_RS10720)	CAETHG_RS10720		Glycerolipid and Glycerophospholipid Metabolism in Bacteria|Bacterial cyanide production and tolerance mechanisms	1	-1000	1000	4.1.1.65	2 H+ + Dianteisopentadecanoylphosphatidylserine <=> CO2 + Dianteisopentadecanoylphosphatidylethanolamine		0	0	0	0	0	0	0	0	0	0	0	0	0	0	0	0	0	0	0	0	0	0	0	0	0	0	0	0	0	0	0	0	0	0	0	0	0
rxn10306_c0	isohexadecanoyl-lipoteichoic acid synthesis (n-24), linked, glucose substituted c0	24 S_cpd00026[c] + S_cpd15754[c] <=> 24 S_cpd00014[c] + S_cpd15763[c]	(CAETHG_RS06265)	CAETHG_RS06265		Teichoic and lipoteichoic acids biosynthesis	1	-1000	1000	2.4.1.52	24 UDP-glucose + Isohexadecanoyllipoteichoic acid (n-24), linked, unsubstituted <=> 24 UDP + Isohexadecanoyllipoteichoic acid (n-24), linked, glucose substituted		0	0	0	0	0	0	0	0	0	0	0	0	0	0	0	0	0	0	0	0	0	0	0	0	0	0	0	0	0	0	0	0	0	0	0	0	0
rxn10222_c0	isotetradecanoyl-phosphatidate cytidylyltransferase c0	S_cpd00052[c] + S_cpd15679[c] <=> S_cpd00012[c] + S_cpd15685[c]	(CAETHG_RS16645)	CAETHG_RS16645		Glycerolipid and Glycerophospholipid Metabolism in Bacteria	1	-1000	1000	2.7.7.41	CTP + 1,2-diisotetradecanoyl-sn-glycerol 3-phosphate <=> PPi + CDP-1,2-diisotetradecanoylglycerol		0	0	0	0	0	0	0	0	0	0	0	0	0	0	0	0	0	0	0	0	0	0	0	0	0	0	0	0	0	0	0	0	0	0	0	0	0
rxn00392_c0	ATP:riboflavin 5'-phosphotransferase c0	S_cpd00002[c] + S_cpd00220[c] <=> S_cpd00008[c] + S_cpd00050[c]	((CAETHG_RS16705) and (CAETHG_RS16705))	CAETHG_RS16705		riboflavin to FAD|Riboflavin, FMN and FAD metabolism	1	-1000	1000	2.7.1.26	ATP + Riboflavin <=> ADP + FMN		1.42065e-06	1.42065e-06	1.42065e-06	1.4553e-06	1.42931e-06	1.50039e-08	1.4553e-06	1.4553e-06	1.42065e-06	1.4553e-06	1.44664e-06	1.50039e-08	1.42065e-06	1.4553e-06	1.43798e-06	1.7325e-08	1.4553e-06	1.42065e-06	1.43798e-06	1.7325e-08	1.42065e-06	1.42065e-06	1.42065e-06	1.42065e-06	0	1.4553e-06	1.4553e-06	1.4553e-06	1.48995e-06	1.46396e-06	1.50039e-08	1.4553e-06	1.4553e-06	1.4553e-06	0	6.93e-07	6.7914e-07
rxn01280_c0	(R)-Glycerate:NAD+ oxidoreductase c0	S_cpd00003[c] + S_cpd00223[c] <=> S_cpd00004[c] + S_cpd00067[c] + S_cpd00843[c]	(CAETHG_RS10710)	CAETHG_RS10710		Glycerate metabolism|D-galactarate, D-glucarate and D-glycerate catabolism|Allantoin degradation|Photorespiration (oxidative C2 cycle)|Allantoin utilisation	1	-1000	1000	1.1.1.60	NAD + Glycerate <=> NADH + H+ + Tartronate semialdehyde		0	0	0	0	0	0	0	0	0	0	0	0	0	0	0	0	0	0	0	0	0	0	0	0	0	0	0	0	0	0	0	0	0	0	0	0	0
rxn10284_c0	anteisoheptadecanoyl-UDP-glucosyltransferase (monoglucosyl) c0	S_cpd00026[c] + S_cpd15702[c] <=> S_cpd00014[c] + S_cpd15741[c]	(CAETHG_RS11420)	CAETHG_RS11420		Teichoic and lipoteichoic acids biosynthesis	1	-1000	1000		UDP-glucose + 1,2-Dianteisoheptadecanoyl-sn-glycerol <=> UDP + Monoglucosyl-1,2 dianteisoheptadecanoylglycerol		0	0	0	0	0	0	0	0	0	0	0	0	0	0	0	0	0	0	0	0	0	0	0	0	0	0	0	0	0	0	0	0	0	0	0	0	0
rxn00328_c0	4-Hydroxy-2-oxoglutarate glyoxylate-lyase c0	S_cpd00830[c] <=> S_cpd00020[c] + S_cpd00040[c]	(((CAETHG_RS15975) or (CAETHG_RS16910)) and ((CAETHG_RS15975) or (CAETHG_RS16910)))	CAETHG_RS15975 CAETHG_RS16910		Proline, 4-hydroxyproline uptake and utilisation|Glyoxylate bypass	1	-1000	1000	4.1.3.16,4.1.1.3,4.1.2.14	4-Hydroxy-2-oxoglutarate <=> Pyruvate + Glyoxalate		0	0	0	0	0	0	0	0	0	0	0	0	0	0	0	0	0	0	0	0	0	0	0	0	0	0	0	0	0	0	0	0	0	0	0	0	0
rxn05336_c0	(3R)-3-Hydroxypalmitoyl-[acyl-carrier-protein]:NADP+ oxidoreductase c0	S_cpd00006[c] + S_cpd11481[c] <=> S_cpd00005[c] + S_cpd00067[c] + S_cpd11485[c]	((CAETHG_RS08435) or (CAETHG_RS00375) or (CAETHG_RS00860) or (CAETHG_RS04365) or (CAETHG_RS06705) or (CAETHG_RS03500) or (CAETHG_RS04680) or (CAETHG_RS09990))	CAETHG_RS00375 CAETHG_RS00860 CAETHG_RS03500 CAETHG_RS04365 CAETHG_RS04680 CAETHG_RS06705 CAETHG_RS08435 CAETHG_RS09990		mycolic acid synthesis|Fatty Acid Biosynthesis FASII	1	-1000	1000		NADP + R-3-hydroxypalmitoyl-acyl-carrierprotein <=> NADPH + H+ + 3-oxohexadecanoyl-acp		0	0	0	0	0	0	0	0	0	0	0	0	0	0	0	0	0	0	0	0	0	0	0	0	0	0	0	0	0	0	0	0	0	0	0	0	0
rxn02287_c0	S-Adenosyl-L-methionine:uroporphyrin-III C-methyltransferase c0	2 S_cpd00017[c] + S_cpd00774[c] <=> 2 S_cpd00019[c] + 2 S_cpd00067[c] + S_cpd01620[c]	(CAETHG_RS05390)	CAETHG_RS05390		Experimental tye|Dissimilatory nitrite reductase|Coenzyme B12 biosynthesis|Heme and Siroheme Biosynthesis	1	-1000	1000	2.1.1.107	2 S-Adenosyl-L-methionine + UroporphyrinogenIII <=> 2 S-Adenosyl-homocysteine + 2 H+ + Precorrin 2		0	0	0	0	0	0	0	0	0	0	0	0	0	0	0	0	0	0	0	0	0	0	0	0	0	0	0	0	0	0	0	0	0	0	0	0	0
rxn02475_c0	2,5-Diamino-6-hydroxy-4-(5-phosphoribosylamino)-pyrimidine c0	S_cpd00001[c] + S_cpd00067[c] + S_cpd00957[c] -> S_cpd00013[c] + S_cpd00931[c]	((CAETHG_RS01445) and (CAETHG_RS01445))	CAETHG_RS01445		Riboflavin, FMN and FAD metabolism	0	0	1000	3.5.4.26	H2O + H+ + 2,5-Diamino-6-(5-phosphoribosylamino)-4-pyrimidineone -> NH3 + 5-Amino-6-5-phosphoribosylaminouracil		1.05534e-05	1.05534e-05	1.05534e-05	1.08108e-05	1.06178e-05	1.11457e-07	1.08108e-05	1.08108e-05	1.05534e-05	1.08108e-05	1.07464e-05	1.11457e-07	1.05534e-05	1.08108e-05	1.06821e-05	1.287e-07	1.08108e-05	1.05534e-05	1.06821e-05	1.287e-07	1.05534e-05	1.05534e-05	1.05534e-05	1.05534e-05	0	1.08108e-05	1.08108e-05	1.08108e-05	1.10682e-05	1.08751e-05	1.11457e-07	1.08108e-05	1.08108e-05	1.08108e-05	0	5.148e-06	5.04504e-06
rxn01304_c0	Succinyl-CoA:L-homoserine O-succinyltransferase c0	S_cpd00078[c] + S_cpd00227[c] -> S_cpd00010[c] + S_cpd00822[c]	(CAETHG_RS02345)	CAETHG_RS02345		Methionine biosynthesis	0	0	1000	2.3.1.46	Succinyl-CoA + L-Homoserine -> CoA + O-Succinyl-L-homoserine		0	0	0	0	0	0	0	0	0	0	0	0	0	0	0	0	0	0	0	0	0	0	0	0	0	0	0	0	0	0	0	0	0	0	0	0	0
rxn08295_c0	diacylglycerol kinase (n-C14:0) c0	S_cpd00002[c] + S_cpd15307[c] <=> S_cpd00008[c] + S_cpd15522[c]	(CAETHG_RS14270)	CAETHG_RS14270		Glycerolipid and Glycerophospholipid Metabolism in Bacteria	1	-1000	1000	2.7.1.107	ATP + 1,2-Diacyl-sn-glycerol ditetradecanoyl <=> ADP + 1,2-ditetradecanoyl-sn-glycerol 3-phosphate		0	0	0	0	0	0	0	0	0	0	0	0	0	0	0	0	0	0	0	0	0	0	0	0	0	0	0	0	0	0	0	0	0	0	0	0	0
rxn05312_c0	PIt6 c0	S_cpd00009[e] + S_cpd00067[e] <=> S_cpd00009[c] + S_cpd00067[c]	(CAETHG_RS16340)	CAETHG_RS16340		Phosphate metabolism	1	-1000	1000		Phosphate + H+ <=> Phosphate + H+		0.0706137	0.0706137	0.0706137	0.072336	0.0710443	0.000745771	0.072336	0.072336	0.0706137	0.072336	0.0719054	0.000745771	0.0706137	0.072336	0.0714748	0.000861143	0.072336	0.0706137	0.0714748	0.000861143	0.0706137	0.0706137	0.0706137	0.0706137	1.60777e-13	0.072336	0.072336	0.072336	0.0740583	0.0727666	0.000745771	0.072336	0.072336	0.072336	0	0.0344457	0.0337568
rxn05671_c0	D-xylose transport in via proton symport c0	S_cpd00067[e] + S_cpd00154[e] <=> S_cpd00067[c] + S_cpd00154[c]	(((CAETHG_RS19305) and ()) or ((CAETHG_RS16880) or (CAETHG_RS10990) or (CAETHG_RS03110)))	CAETHG_RS03110 CAETHG_RS10990 CAETHG_RS16880 CAETHG_RS19305		Xylose utilisation	1	-1000	1000		H+ + Xylose <=> H+ + Xylose		0	0	0	0	0	0	0	0	0	0	0	0	0	0	0	0	0	0	0	0	0	0	0	0	0	0	0	0	0	0	0	0	0	0	0	0	0
rxn02774_c0	S-Adenosyl-L-methionine:uroporphyrin-III C-methyltransferase c0	S_cpd00003[c] + S_cpd01620[c] <=> S_cpd00004[c] + S_cpd00067[c] + S_cpd03426[c]	((CAETHG_RS05390) or (CAETHG_RS05400))	CAETHG_RS05390 CAETHG_RS05400		Experimental tye|Heme and Siroheme Biosynthesis	1	-1000	1000	1.3.1.76,2.1.1.107	NAD + Precorrin 2 <=> NADH + H+ + Sirohydrochlorin		0	0	0	0	0	0	0	0	0	0	0	0	0	0	0	0	0	0	0	0	0	0	0	0	0	0	0	0	0	0	0	0	0	0	0	0	0
rxn05172_c0	Taurine-ABC transport c0	S_cpd00001[c] + S_cpd00002[c] + S_cpd00210[e] -> S_cpd00008[c] + S_cpd00009[c] + S_cpd00067[c] + S_cpd00210[c]	((CAETHG_RS03475) or (() and ((CAETHG_RS03470) or (CAETHG_RS19320)) and ((CAETHG_RS03465) or (CAETHG_RS19325))))	CAETHG_RS03465 CAETHG_RS03470 CAETHG_RS03475 CAETHG_RS19320 CAETHG_RS19325		Alkanesulfonate assimilation	0	0	1000	3.A.1.17	H2O + ATP + Taurine -> ADP + Phosphate + H+ + Taurine		0	0	0	0	0	0	0	0	0	0	0	0	0	0	0	0	0	0	0	0	0	0	0	0	0	0	0	0	0	0	0	0	0	0	0	0	0
rxn10303_c0	isotetradecanoyl-lipoteichoic acid synthesis (n-24), linked, glucose substituted c0	24 S_cpd00026[c] + S_cpd15751[c] <=> 24 S_cpd00014[c] + S_cpd15760[c]	(CAETHG_RS06265)	CAETHG_RS06265		Teichoic and lipoteichoic acids biosynthesis	1	-1000	1000	2.4.1.52	24 UDP-glucose + Isotetradecanoyllipoteichoic acid (n-24), linked, unsubstituted <=> 24 UDP + Isotetradecanoyllipoteichoic acid (n-24), linked, glucose substituted		0	0	0	0	0	0	0	0	0	0	0	0	0	0	0	0	0	0	0	0	0	0	0	0	0	0	0	0	0	0	0	0	0	0	0	0	0
rxn03408_c0	UDP-N-acetylglucosamine-N-acetylmuramyl-(pentapeptide)pyrophosphoryl-undecaprenol N-acetylglucosamine transferase c0	S_cpd00037[c] + S_cpd03494[c] <=> S_cpd00014[c] + S_cpd03495[c]	(CAETHG_RS14885)	CAETHG_RS14885		Peptidoglycan Biosynthesis|Peptidoglycan Biosynthesis 2	1	-1000	1000	2.4.1.227	UDP-N-acetylglucosamine + Undecaprenyl-diphospho-N-acetylmuramoyl-L-alanyl-D-glutamyl-meso-2-6-diaminopimeloyl-D-alanyl-D-alanine <=> UDP + Undecaprenyl-diphospho-N-acetylmuramoyl-N-acetylglucosamine-L-ala-D-glu-meso-2-6-diaminopimeloyl-D-ala-D-ala		0	0	0	0	0	0	0	0	0	0	0	0	0	0	0	0	0	0	0	0	0	0	0	0	0	0	0	0	0	0	0	0	0	0	0	0	0
rxn09203_c0	Phosphatidylserine decarboxylase (n-C18:1) c0	2 S_cpd00067[c] + S_cpd15558[c] <=> S_cpd00011[c] + S_cpd15534[c]	(CAETHG_RS10720)	CAETHG_RS10720		Glycerolipid and Glycerophospholipid Metabolism in Bacteria|Bacterial cyanide production and tolerance mechanisms	1	-1000	1000	4.1.1.65	2 H+ + phosphatidylserine dioctadec-11-enoyl <=> CO2 + phosphatidylethanolamine dioctadec-11-enoyl		0	0	0	0	0	0	0	0	0	0	0	0	0	0	0	0	0	0	0	0	0	0	0	0	0	0	0	0	0	0	0	0	0	0	0	0	0
rxn01485_c0	D-Glucosamine 1-phosphate 1,6-phosphomutase c0	S_cpd03671[c] <=> S_cpd00288[c]	((CAETHG_RS09140) or (CAETHG_RS06345))	CAETHG_RS06345 CAETHG_RS09140		UDP-N-acetylmuramate biosynthesis	1	-1000	1000	5.4.2.10	D-Glucosamine1-phosphate <=> D-Glucosamine phosphate		-0.00974325	-0.00974325	-0.00974325	-0.00998089	-0.00980266	0.000102901	-0.00998089	-0.00998089	-0.00974325	-0.00998089	-0.00992148	0.000102901	-0.00974325	-0.00998089	-0.00986207	0.00011882	-0.00998089	-0.00974325	-0.00986207	0.00011882	-0.00974325	-0.00974325	-0.00974325	-0.00974325	0	-0.00998089	-0.00998089	-0.00998089	-0.0102185	-0.0100403	0.000102901	-0.00998089	-0.00998089	-0.00998089	0	-0.0047528	-0.00465775
rxn10184_c0	D-sorbitol transport via PEP:Pyr PTS c0	S_cpd00061[c] + S_cpd00588[e] <=> S_cpd00020[c] + S_cpd00804[c]	(() and (CAETHG_RS09185) and () and () and ())	CAETHG_RS09185		D-Sorbitol(D-Glucitol) and L-Sorbose utilisation	1	-1000	1000		Phosphoenolpyruvate + Sorbitol <=> Pyruvate + Sorbitol 6-phosphate		0	0	0	0	0	0	0	0	0	0	0	0	0	0	0	0	0	0	0	0	0	0	0	0	0	0	0	0	0	0	0	0	0	0	0	0	0
rxn00245_c0	(R,R)-Tartrate hydro-lyase c0	S_cpd00666[c] -> S_cpd00001[c] + S_cpd00032[c]	((CAETHG_RS09215) or (CAETHG_RS09220))	CAETHG_RS09215 CAETHG_RS09220			0	0	1000	4.2.1.32,4.2.1.81	Tartrate -> H2O + Oxaloacetate		0	0	0	0	0	0	0	0	0	0	0	0	0	0	0	0	0	0	0	0	0	0	0	0	0	0	0	0	0	0	0	0	0	0	0	0	0
rxn01291_c0	L-Arabitol:NADP+ 1-oxidoreductase c0	S_cpd00006[c] + S_cpd00417[c] <=> S_cpd00005[c] + S_cpd00067[c] + S_cpd00224[c]	(CAETHG_RS19085)	CAETHG_RS19085		Experimental tye|D-gluconate and ketogluconates metabolism	1	-1000	1000	1.1.1.21	NADP + L-Lyxitol <=> NADPH + H+ + L-Arabinose		0	0	0	0	0	0	0	0	0	0	0	0	0	0	0	0	0	0	0	0	0	0	0	0	0	0	0	0	0	0	0	0	0	0	0	0	0
rxn05571_c0	D-gluconate transport via proton symport c0	S_cpd00067[e] + S_cpd00222[e] <=> S_cpd00067[c] + S_cpd00222[c]	(((CAETHG_RS10680) or (CAETHG_RS15960)) or (CAETHG_RS03860))	CAETHG_RS03860 CAETHG_RS10680 CAETHG_RS15960		D-gluconate and ketogluconates metabolism	1	-1000	1000		H+ + GLCN <=> H+ + GLCN		0	0	0	0	0	0	0	0	0	0	0	0	0	0	0	0	0	0	0	0	0	0	0	0	0	0	0	0	0	0	0	0	0	0	0	0	0
rxn05540_c0	Dipeptide transport via ABC system (ala-gln) c0	S_cpd00001[c] + S_cpd00002[c] + S_cpd11587[e] -> S_cpd00008[c] + S_cpd00009[c] + S_cpd00067[c] + S_cpd11587[c]	(CAETHG_RS07520)	CAETHG_RS07520		ABC transporter dipeptide (TC 3.A.1.5.2)	0	0	1000		H2O + ATP + Ala-Gln -> ADP + Phosphate + H+ + Ala-Gln		0	0	0	0	0	0	0	0	0	0	0	0	0	0	0	0	0	0	0	0	0	0	0	0	0	0	0	0	0	0	0	0	0	0	0	0	0
rxn01201_c0	4-Hydroxybutanoate:NAD+ oxidoreductase c0	S_cpd00003[c] + S_cpd00728[c] <=> S_cpd00004[c] + S_cpd00067[c] + S_cpd00199[c]	(CAETHG_RS08425)	CAETHG_RS08425			1	-1000	1000	1.1.1.61	NAD + 4-Hydroxybutanoate <=> NADH + H+ + 4-Oxobutanoate		0	0	0	0	0	0	0	0	0	0	0	0	0	0	0	0	0	0	0	0	0	0	0	0	0	0	0	0	0	0	0	0	0	0	0	0	0
rxn01629_c0	(S)-4-Amino-5-oxopentanoate 4,5-aminomutase c0	S_cpd00338[c] <=> S_cpd02345[c]	(CAETHG_RS12410)	CAETHG_RS12410		Experimental tye|Heme and Siroheme Biosynthesis	1	-1000	1000	5.4.3.8	5-Aminolevulinate <=> L-Glutamate1-semialdehyde		0	0	0	0	0	0	0	0	0	0	0	0	0	0	0	0	0	0	0	0	0	0	0	0	0	0	0	0	0	0	0	0	0	0	0	0	0
rxn10204_c0	stearoyl-glycerol-3-phosphate O-acyltransferase c0	S_cpd00080[c] + S_cpd00327[c] -> S_cpd00010[c] + S_cpd15329[c]	(() and (CAETHG_RS16510))	CAETHG_RS16510		Glycerolipid and Glycerophospholipid Metabolism in Bacteria	0	0	1000	2.3.1.15	Glycerol-3-phosphate + strcoa -> CoA + 1-octadecanoyl-sn-glycerol 3-phosphate		0	0	0	0	0	0	0	0	0	0	0	0	0	0	0	0	0	0	0	0	0	0	0	0	0	0	0	0	0	0	0	0	0	0	0	0	0
rxn05669_c0	L-valine transport in via proton symport c0	S_cpd00067[e] + S_cpd00156[e] <=> S_cpd00067[c] + S_cpd00156[c]	(CAETHG_RS19045)	CAETHG_RS19045		Transport Reactions	1	-1000	1000	proton	H+ + L-Valine <=> H+ + L-Valine		-0.0890569	-0.0986769	-0.113697	-0.100464	-0.100474	0.00878102	-0.109584	-0.0853841	-0.135917	-0.0919641	-0.105712	0.0195548	0	0	0	0	0	0	0	0	-0.102717	0	-0.070106	-0.0576076	0.0428552	-0.0990641	-0.0376195	-0.000669548	-0.0125831	-0.0374841	0.037972	-0.0764241	-0.11977	-0.0980968	0.0216727	-0.0453448	-0.0436379
rxn08086_c0	1-hexadecanoyl-sn-glycerol 3-phosphate O-acyltransferase (n-C16:0) c0	S_cpd15277[c] + S_cpd15327[c] -> S_cpd11493[c] + S_cpd15524[c]	((CAETHG_RS13530) or (CAETHG_RS08580))	CAETHG_RS08580 CAETHG_RS13530		Phosphate metabolism|Glycerolipid and Glycerophospholipid Metabolism in Bacteria	0	0	1000	2.3.1.51	Palmitoyl-ACP + 1-hexadecanoyl-sn-glycerol 3-phosphate -> ACP + 1,2-dihexadecanoyl-sn-glycerol 3-phosphate		0	0	0	0	0	0	0	0	0	0	0	0	0	0	0	0	0	0	0	0	0	0	0	0	0	0	0	0	0	0	0	0	0	0	0	0	0
rxn06874_c0	reduced ferredoxin:dinitrogen oxidoreductase (ATP-hydrolysing) c0	16 S_cpd00001[c] + 16 S_cpd00002[c] + S_cpd00528[c] + 8 S_cpd11620[c] <=> 16 S_cpd00008[c] + 16 S_cpd00009[c] + 2 S_cpd00013[c] + 6 S_cpd00067[c] + 8 S_cpd11621[c] + S_cpd11640[c]	(((CAETHG_RS01985) or (CAETHG_RS12640)) or (CAETHG_RS12660))	CAETHG_RS01985 CAETHG_RS12640 CAETHG_RS12660		Nitrogen fixation	1	-1000	1000	1.18.6.1	16 H2O + 16 ATP + N2 + 8 Reducedferredoxin <=> 16 ADP + 16 Phosphate + 2 NH3 + 6 H+ + 8 Oxidizedferredoxin + H2		0	0	0	0	0	0	0	0	0	0	0	0	0	0	0	0	0	0	0	0	0	0	0	0	0	0	0	0	0	0	0	0	0	0	0	0	0
rxn01548_c0	guanosine:orthophosphate ribosyltransferase c0	S_cpd00009[c] + S_cpd00067[c] + S_cpd00311[c] <=> S_cpd00207[c] + S_cpd00475[c]	(CAETHG_RS00760)	CAETHG_RS00760		Xanthosine utilisation (xap region)	1	-1000	1000	2.4.2.1,2.4.2.15	Phosphate + H+ + Guanosine <=> Guanine + Ribose 1-phosphate		0	0	0	0	0	0	0	0	0	0	0	0	0	0	0	0	0	0	0	0	0	0	0	0	0	0	0	0	0	0	0	0	0	0	0	0	0
rxn00785_c0	D-Fructose 6-phosphate:D-glyceraldehyde-3-phosphate glycolaldehyde c0	S_cpd00072[c] + S_cpd00102[c] <=> S_cpd00198[c] + S_cpd00236[c]	(((CAETHG_RS11925) or (CAETHG_RS03090)) or ((CAETHG_RS03095) or (CAETHG_RS11920)))	CAETHG_RS03090 CAETHG_RS03095 CAETHG_RS11920 CAETHG_RS11925		Pentose Phosphate Pathway	1	-1000	1000	2.2.1.1	D-fructose-6-phosphate + Glyceraldehyde3-phosphate <=> D-Xylulose5-phosphate + D-Erythrose4-phosphate		0.0106366	0.0106366	0.0106366	0.010896	0.0107014	0.000112336	0.010896	0.010896	0.0106366	0.010896	0.0108311	0.000112336	0.0106366	0.010896	0.0107663	0.000129714	0.010896	0.0106366	0.0107663	0.000129714	0.0106366	0.0106366	0.0106366	0.0106366	0	0.010896	0.010896	0.010896	0.0111554	0.0109608	0.000112336	0.010896	0.010896	0.010896	0	0.00518857	0.0050848
rxn03084_c0	5'-Phosphoribosylformylglycinamide:L-glutamine amido-ligase c0	S_cpd00001[c] + S_cpd00002[c] + S_cpd00053[c] + S_cpd02678[c] -> S_cpd00008[c] + S_cpd00009[c] + S_cpd00023[c] + S_cpd00067[c] + S_cpd02826[c]	(() and (CAETHG_RS15930) and (CAETHG_RS15930))	CAETHG_RS15930		De Novo Purine Biosynthesis	0	0	1000	6.3.5.3	H2O + ATP + L-Glutamine + N-Formyl-GAR -> ADP + Phosphate + L-Glutamate + H+ + 5-Phosphoribosylformylglycinamidine		0.00878687	0.00878687	0.00878687	0.00900118	0.00884045	9.28006e-05	0.00900118	0.00900118	0.00878687	0.00900118	0.0089476	9.28006e-05	0.00878687	0.00900118	0.00889402	0.000107157	0.00900118	0.00878687	0.00889402	0.000107157	0.00878687	0.00878687	0.00878687	0.00878687	8.64005e-14	0.00900118	0.00900118	0.00900118	0.0092155	0.00905476	9.28006e-05	0.00900118	0.00900118	0.00900118	1.42109e-14	0.00428628	0.00420055
rxn00011_c0	pyruvate:thiamin diphosphate acetaldehydetransferase c0	S_cpd00020[c] + S_cpd00056[c] + S_cpd00067[c] -> S_cpd00011[c] + S_cpd03049[c]	(((CAETHG_RS00590) or (CAETHG_RS01930)) and (CAETHG_RS00595))	CAETHG_RS00590 CAETHG_RS00595 CAETHG_RS01930		Dehydrogenase complexes|Methionine Degradation|Pyruvate metabolism II: acetyl-CoA, acetogenesis from pyruvate	0	0	1000	1.2.4.1,2.2.1.6,4.1.1.1	Pyruvate + TPP + H+ -> CO2 + 2-Hydroxyethyl-ThPP		0.00708964	0.00708964	0.00708964	0.00726256	0.00713287	7.48757e-05	0.00726256	0.00726256	0.00708964	0.00726256	0.00721933	7.48757e-05	0.00708964	0.00726256	0.0071761	8.6459e-05	0.00726256	0.00708964	0.0071761	8.6459e-05	0.00708964	0.00708964	0.00708964	0.00708964	0	0.00726256	0.00726256	0.00726256	0.00743548	0.00730579	7.48757e-05	0.00726256	0.00726256	0.00726256	0	0.00345836	0.00338919
rxn00292_c0	UDP-N-acetyl-D-glucosamine 2-epimerase c0	S_cpd00001[c] + S_cpd00037[c] -> S_cpd00014[c] + S_cpd00492[c]	((CAETHG_RS11515) or (CAETHG_RS06275))	CAETHG_RS06275 CAETHG_RS11515		Vibrio Polysaccharide (VPS) Biosynthesis|CMP-N-acetylneuraminate Biosynthesis|Streptococcus agalactiae virulome|Legionaminic Acid Biosynthesis|Sialic Acid Metabolism	0	0	1000	5.1.3.14	H2O + UDP-N-acetylglucosamine -> UDP + N-Acetyl-D-mannosamine		0	0	0	0	0	0	0	0	0	0	0	0	0	0	0	0	0	0	0	0	0	0	0	0	0	0	0	0	0	0	0	0	0	0	0	0	0
rxn05252_c0	FACOAL170(ISO) c0	S_cpd00002[c] + S_cpd00010[c] + S_cpd00067[c] + S_cpd11431[c] -> S_cpd00012[c] + S_cpd00018[c] + S_cpd11432[c]	(CAETHG_RS08635)	CAETHG_RS08635		Fatty acid degradation regulons|Unsaturated Fatty Acid Metabolism|Carbonate Biomineralization|n-Phenylalkanoic acid degradation|Biotin biosynthesis	0	0	1000	6.2.1.3	ATP + CoA + H+ + fa11 -> PPi + AMP + fa11coa		0	0	0	0	0	0	0	0	0	0	0	0	0	0	0	0	0	0	0	0	0	0	0	0	0	0	0	0	0	0	0	0	0	0	0	0	0
rxn05466_c0	Ammonia transport via diffusion c0	S_cpd00013[e] <=> S_cpd00013[c]	(CAETHG_RS12145)	CAETHG_RS12145		Ammonia assimilation	1	-1000	1000		NH3 <=> NH3		0.145071	0.144691	0.149711	0.132966	0.143109	0.00618084	0.302086	0.287886	0.321931	0.284466	0.299092	0.0147484	0.0360137	0.0625018	0.0492577	0.0132441	0.192502	0.196014	0.194258	0.00175593	0.148731	0.0360137	0.13612	0.106955	0.0504263	0.291566	0.240121	0.193171	0.211573	0.234108	0.0371524	0.0789259	0.122271	0.100599	0.0216727	-0.0948924	-0.169195
cpd00013_ext_b		S_cpd00013[e] <=>				Exchange Reactions	1	-1000	1000		NH3 <=>		-0.145071	-0.144691	-0.149711	-0.132966	-0.143109	0.00618084	-0.302086	-0.287886	-0.321931	-0.284466	-0.299092	0.0147484	-0.0360137	-0.0625018	-0.0492577	0.0132441	-0.192502	-0.196014	-0.194258	0.00175593	-0.148731	-0.0360137	-0.13612	-0.106955	0.0504263	-0.291566	-0.240121	-0.193171	-0.211573	-0.234108	0.0371524	-0.0789259	-0.122271	-0.100599	0.0216727	0.0948924	0.169195
rxn01513_c0	ATP:dTMP phosphotransferase c0	S_cpd00002[c] + S_cpd00298[c] <=> S_cpd00008[c] + S_cpd00297[c]	(CAETHG_RS11060)	CAETHG_RS11060		Pyrimidine conversions	1	-1000	1000	2.7.4.12,2.7.4.9	ATP + dTMP <=> ADP + dTDP		0.00120778	0.00120778	0.00120778	0.00123724	0.00121514	1.27557e-05	0.00123724	0.00123724	0.00120778	0.00123724	0.00122987	1.27557e-05	0.00120778	0.00123724	0.00122251	1.4729e-05	0.00123724	0.00120778	0.00122251	1.4729e-05	0.00120778	0.00120778	0.00120778	0.00120778	0	0.00123724	0.00123724	0.00123724	0.00126669	0.0012446	1.27557e-05	0.00123724	0.00123724	0.00123724	0	0.00058916	0.000577377
rxn02476_c0	Phosphoenolpyruvate:3-phosphoshikimate c0	S_cpd00061[c] + S_cpd02030[c] <=> S_cpd00009[c] + S_cpd00067[c] + S_cpd00932[c]	(CAETHG_RS04335)	CAETHG_RS04335		Chorismate synthesis	1	-1000	1000	2.5.1.19	Phosphoenolpyruvate + 3-phosphoshikimate <=> Phosphate + H+ + 5-O-1-Carboxyvinyl-3-phosphoshikimate		0.00573255	0.00573255	0.00573255	0.00587236	0.0057675	6.05431e-05	0.00587236	0.00587236	0.00573255	0.00587236	0.00583741	6.05431e-05	0.00573255	0.00587236	0.00580246	6.99091e-05	0.00587236	0.00573255	0.00580246	6.99091e-05	0.00573255	0.00573255	0.00573255	0.00573255	0	0.00587236	0.00587236	0.00587236	0.00601218	0.00590732	6.05431e-05	0.00587236	0.00587236	0.00587236	0	0.00279636	0.00274044
rxn02112_c0	(R,R)-Butane-2,3-diol:NAD+ oxidoreductase c0	S_cpd00003[c] + S_cpd01947[c] <=> S_cpd00004[c] + S_cpd00067[c] + S_cpd00361[c]	((CAETHG_RS03100) or (CAETHG_RS01830))	CAETHG_RS01830 CAETHG_RS03100		Butanediol Pathway	1	-1000	1000	1.1.1.4	NAD + BDOH <=> NADH + H+ + ACTN		0	0	0	0	0	0	-0.06	-0.06	-0.07	-0.07	-0.065	0.005	0	0	0	0	-0.09	-0.09	-0.09	0	0	0	0	0	0	0	0	0	0	0	0	0	0	0	0	0	0
rxn01870_c0	D-Fructose 1-phosphate D-glyceraldehyde-3-phosphate-lyase c0	S_cpd00802[c] <=> S_cpd00095[c] + S_cpd00448[c]	((CAETHG_RS11740) or (CAETHG_RS10700))	CAETHG_RS10700 CAETHG_RS11740		Glycolysis/Gluconeogenesis	1	-1000	1000	4.1.2.13	D-fructose-1-phosphate <=> Glycerone-phosphate + D-Glyceraldehyde		0	0	0	0	0	0	0	0	0	0	0	0	0	0	0	0	0	0	0	0	0	0	0	0	0	0	0	0	0	0	0	0	0	0	0	0	0
rxn04954_c0	5-methyltetrahydrofolate:NAD+ oxidoreductase c0	S_cpd00004[c] + S_cpd00067[c] + S_cpd00125[c] -> S_cpd00003[c] + S_cpd00345[c]	(CAETHG_RS07830)	CAETHG_RS07830		Wood-Ljungdahl Pathway	0	0	0	1.5.1.20	NADH + H+ + 5-10-Methylenetetrahydrofolate -> NAD + 5-Methyltetrahydrofolate		0	0	0	0	0	0	0	0	0	0	0	0	0	0	0	0	0	0	0	0	0	0	0	0	0	0	0	0	0	0	0	0	0	0	0	0	0
rxn01575_c0	L-Isoleucine:2-oxoglutarate aminotransferase c0	S_cpd00024[c] + S_cpd00322[c] <=> S_cpd00023[c] + S_cpd00508[c]	((CAETHG_RS14595) or (CAETHG_RS17440) or (CAETHG_RS14905))	CAETHG_RS14595 CAETHG_RS14905 CAETHG_RS17440		Isoleucine Biosynthesis	1	-1000	1000	2.6.1.42	2-Oxoglutarate + L-Isoleucine <=> L-Glutamate + 3MOP		-0.00708964	-0.00708964	-0.00708964	-0.00726256	-0.00713287	7.48757e-05	-0.00726256	-0.00726256	-0.00708964	-0.00726256	-0.00721933	7.48757e-05	-0.00708964	-0.00726256	-0.0071761	8.6459e-05	-0.00726256	-0.00708964	-0.0071761	8.6459e-05	-0.00708964	-0.00708964	-0.00708964	-0.00708964	0	-0.00726256	-0.00726256	-0.00726256	-0.00743548	-0.00730579	7.48757e-05	-0.00726256	-0.00726256	-0.00726256	0	-0.00345836	-0.00338919
rxn09206_c0	Phosphatidylserine syntase (n-C14:0) c0	S_cpd00054[c] + S_cpd15423[c] -> S_cpd00046[c] + S_cpd00067[c] + S_cpd15553[c]	(CAETHG_RS11850)	CAETHG_RS11850		Glycerolipid and Glycerophospholipid Metabolism in Bacteria	0	0	1000	2.7.8.8	L-Serine + CDP-1,2-ditetradecanoylglycerol -> CMP + H+ + phosphatidylserine ditetradecanoyl		0	0	0	0	0	0	0	0	0	0	0	0	0	0	0	0	0	0	0	0	0	0	0	0	0	0	0	0	0	0	0	0	0	0	0	0	0
rxn00781_c0	D-Glyceraldehyde-3-phosphate:NAD+ oxidoreductase(phosphorylating) c0	S_cpd00003[c] + S_cpd00009[c] + S_cpd00102[c] <=> S_cpd00004[c] + S_cpd00203[c]	((CAETHG_RS08515) or (CAETHG_RS16815))	CAETHG_RS08515 CAETHG_RS16815		Glycolysis/Gluconeogenesis	1	-1000	1000	1.2.1.12	NAD + Phosphate + Glyceraldehyde3-phosphate <=> NADH + 1,3-Bisphospho-D-glycerate		-0.115792	-0.115792	-0.115792	-0.118616	-0.116498	0.00122291	-0.118616	-0.118616	-0.115792	-0.118616	-0.11791	0.00122291	-0.115792	-0.118616	-0.117204	0.00141209	-0.118616	-0.115792	-0.117204	0.00141209	-0.115792	-0.115792	-0.115792	-0.115792	1.60777e-13	-0.118616	-0.118616	-0.118616	-0.12144	-0.119322	0.00122291	-0.118616	-0.118616	-0.118616	5.68434e-14	-0.0564838	-0.0553541
rxn00973_c0	citrate hydro-lyase c0	S_cpd00137[c] <=> S_cpd00260[c]	(() and () and () and () and ((CAETHG_RS05015) or (CAETHG_RS13540)))	CAETHG_RS05015 CAETHG_RS13540		Citric Acid Cycle	1	0	0	4.2.1.3	Citrate <=> Isocitrate		0	0	0	0	0	0	0	0	0	0	0	0	0	0	0	0	0	0	0	0	0	0	0	0	0	0	0	0	0	0	0	0	0	0	0	0	0
rxn01985_c0	Deoxyinosine:orthophosphate ribosyltransferase c0	S_cpd00009[c] + S_cpd00067[c] + S_cpd03279[c] <=> S_cpd00226[c] + S_cpd00509[c]	(CAETHG_RS00760)	CAETHG_RS00760		Xanthosine utilisation (xap region)	1	-1000	1000	2.4.2.1,2.4.2.4	Phosphate + H+ + Deoxyinosine <=> HYXN + deoxyribose-1-phosphate		0	0	0	0	0	0	0	0	0	0	0	0	0	0	0	0	0	0	0	0	0	0	0	0	0	0	0	0	0	0	0	0	0	0	0	0	0
rxn00775_c0	ADPribose ribophosphohydrolase c0	S_cpd00001[c] + S_cpd00251[c] -> S_cpd00018[c] + S_cpd00101[c]	((CAETHG_RS05430) or (CAETHG_RS15775))	CAETHG_RS05430 CAETHG_RS15775		NAD and NADP cofactor biosynthesis global|Nudix proteins (nucleoside triphosphate hydrolases)	0	0	1000	3.6.1.13	H2O + ADPribose -> AMP + ribose-5-phosphate		0	0	0	0	0	0	0	0	0	0	0	0	0	0	0	0	0	0	0	0	0	0	0	0	0	0	0	0	0	0	0	0	0	0	0	0	0
rxn00364_c0	ATP:CMP phosphotransferase c0	S_cpd00002[c] + S_cpd00046[c] <=> S_cpd00008[c] + S_cpd00096[c]	(CAETHG_RS01040)	CAETHG_RS01040		Pyrimidine conversions	1	-1000	1000	2.7.4.14	ATP + CMP <=> ADP + CDP		0.0325401	0.0325401	0.0325401	0.0333338	0.0327385	0.000343666	0.0333338	0.0333338	0.0325401	0.0333338	0.0331354	0.000343666	0.0325401	0.0333338	0.032937	0.000396831	0.0333338	0.0325401	0.032937	0.000396831	0.0325401	0.0325401	0.0325401	0.0325401	0	0.0333338	0.0333338	0.0333338	0.0341274	0.0335322	0.000343666	0.0333338	0.0333338	0.0333338	0	0.0158732	0.0155558
rxn01025_c0	5-Methylcytosine aminohydrolase c0	S_cpd00001[c] + S_cpd00067[c] + S_cpd01587[c] -> S_cpd00013[c] + S_cpd00151[c]	((CAETHG_RS19880) or (CAETHG_RS04720))	CAETHG_RS04720 CAETHG_RS19880		Pyrimidine conversions	0	0	1000	3.5.4.1	H2O + H+ + 5-Methylcytosine -> NH3 + Thymine		0	0	0	0	0	0	0	0	0	0	0	0	0	0	0	0	0	0	0	0	0	0	0	0	0	0	0	0	0	0	0	0	0	0	0	0	0
rxn02011_c0	UDP-N-acetylmuramoyl-L-alanyl-D-glutamate:meso-2,6- c0	S_cpd00002[c] + S_cpd00516[c] + S_cpd00525[c] -> S_cpd00008[c] + S_cpd00009[c] + S_cpd00067[c] + S_cpd02964[c]	(CAETHG_RS15460)	CAETHG_RS15460		Peptidoglycan Biosynthesis|Methicillin resistance in Staphylococci|Peptidoglycan Biosynthesis 2	0	0	1000	6.3.2.13	ATP + meso-2,6-Diaminopimelate + UDP-N-acetylmuramoyl-L-alanyl-D-glutamate -> ADP + Phosphate + H+ + UDP-N-acetylmuramoyl-L-alanyl-D-gamma-glutamyl-meso-2-6-diaminopimelate		0	0	0	0	0	0	0	0	0	0	0	0	0	0	0	0	0	0	0	0	0	0	0	0	0	0	0	0	0	0	0	0	0	0	0	0	0
rxn10227_c0	anteisoheptadecanoyl-CDPdiacylglycerol-serine O-phosphatidyltransferase c0	S_cpd00054[c] + S_cpd15684[c] -> S_cpd00046[c] + S_cpd00067[c] + S_cpd15690[c]	(CAETHG_RS11850)	CAETHG_RS11850		Glycerolipid and Glycerophospholipid Metabolism in Bacteria	0	0	1000	2.7.8.8	L-Serine + CDP-1,2-dianteisoheptadecanoylglycerol -> CMP + H+ + Dianteisoheptadecanoylphosphatidylserine		0	0	0	0	0	0	0	0	0	0	0	0	0	0	0	0	0	0	0	0	0	0	0	0	0	0	0	0	0	0	0	0	0	0	0	0	0
rxn00917_c0	Xanthosine-5'-phosphate:L-glutamine amido-ligase (AMP-forming) c0	S_cpd00001[c] + S_cpd00002[c] + S_cpd00053[c] + S_cpd00497[c] -> S_cpd00012[c] + S_cpd00018[c] + S_cpd00023[c] + S_cpd00067[c] + S_cpd00126[c]	(CAETHG_RS07620)	CAETHG_RS07620		Staphylococcal pathogenicity islands SaPI|Purine conversions	0	0	1000	6.3.5.2	H2O + ATP + L-Glutamine + XMP -> PPi + AMP + L-Glutamate + H+ + GMP		0.00532893	0.00532893	0.00532893	0.0054589	0.00536142	5.62803e-05	0.0054589	0.0054589	0.00532893	0.0054589	0.00542641	5.62803e-05	0.00532893	0.0054589	0.00539392	6.49869e-05	0.0054589	0.00532893	0.00539392	6.49869e-05	0.00532893	0.00532893	0.00532893	0.00532893	0	0.0054589	0.0054589	0.0054589	0.00558888	0.0054914	5.62803e-05	0.0054589	0.0054589	0.0054589	0	0.00259948	0.00254749
rxn09113_c0	Phosphatidylglycerol synthase (n-C18:0) c0	S_cpd00080[c] + S_cpd15421[c] <=> S_cpd00046[c] + S_cpd15547[c]	((CAETHG_RS16745) or (CAETHG_RS06675))	CAETHG_RS06675 CAETHG_RS16745		Glycerolipid and Glycerophospholipid Metabolism in Bacteria	1	-1000	1000	2.7.8.5	Glycerol-3-phosphate + CDP-1,2-dioctadecanoylglycerol <=> CMP + Phosphatidylglycerophosphate dioctadecanoyl		0	0	0	0	0	0	0	0	0	0	0	0	0	0	0	0	0	0	0	0	0	0	0	0	0	0	0	0	0	0	0	0	0	0	0	0	0
rxn03536_c0	Adenosyl cobinamide kinase c0	S_cpd00002[c] + S_cpd03918[c] -> S_cpd00008[c] + S_cpd00067[c] + S_cpd03919[c]	(CAETHG_RS07025)	CAETHG_RS07025		Cobalamin synthesis|Coenzyme B12 biosynthesis	0	0	1000	2.7.1.156	ATP + Adenosyl cobinamide -> ADP + H+ + Adenosyl cobinamide phosphate		0	0	0	0	0	0	0	0	0	0	0	0	0	0	0	0	0	0	0	0	0	0	0	0	0	0	0	0	0	0	0	0	0	0	0	0	0
rxn01044_c0	D-Xylose ketol-isomerase c0	S_cpd00154[c] <=> S_cpd00259[c]	(CAETHG_RS19290)	CAETHG_RS19290		Xylose Degradation	1	-1000	1000	5.3.1.5	Xylose <=> D-Lyxulose		0	0	0	0	0	0	0	0	0	0	0	0	0	0	0	0	0	0	0	0	0	0	0	0	0	0	0	0	0	0	0	0	0	0	0	0	0
rxn12846_c0	Gly-Phe aminopeptidase c0	S_cpd00001[c] + S_cpd15605[c] <=> S_cpd00033[c] + S_cpd00066[c]	(((CAETHG_RS04585) or (CAETHG_RS15660)) or (CAETHG_RS03545) or (CAETHG_RS07155))	CAETHG_RS03545 CAETHG_RS04585 CAETHG_RS07155 CAETHG_RS15660		Recycling of Peptidoglycan Amino Acids|Protein degradation	1	-1000	1000	3.4.11.2	H2O + Gly-Phe <=> Glycine + L-Phenylalanine		0	0	0	0	0	0	0	0	0	0	0	0	0	0	0	0	0	0	0	0	0	0	0	0	0	0	0	0	0	0	0	0	0	0	0	0	0
rxn01297_c0	Xanthine:NAD+ oxidoreductase c0	S_cpd00001[c] + S_cpd00003[c] + S_cpd00226[c] <=> S_cpd00004[c] + S_cpd00067[c] + S_cpd00309[c]	(((CAETHG_RS02025) or (CAETHG_RS04725)) or ((CAETHG_RS04735) or (CAETHG_RS02015) or (CAETHG_RS02245) or (CAETHG_RS02175) or (CAETHG_RS02170)) or ((CAETHG_RS02165) or (CAETHG_RS04730) or (CAETHG_RS02245)))	CAETHG_RS02015 CAETHG_RS02025 CAETHG_RS02165 CAETHG_RS02170 CAETHG_RS02175 CAETHG_RS02245 CAETHG_RS04725 CAETHG_RS04730 CAETHG_RS04735		Purine utilisation	1	-1000	1000	1.17.1.4,1.1.1.204	H2O + NAD + HYXN <=> NADH + H+ + XAN		0	0	0	0	0	0	0	0	0	0	0	0	0	0	0	0	0	0	0	0	0	0	0	0	0	0	0	0	0	0	0	0	0	0	0	0	0
rxn08547_c0	glycerol-3-phosphate acyltransferase (C14:0) c0	S_cpd00080[c] + S_cpd11466[c] -> S_cpd11493[c] + S_cpd15331[c]	(() and (CAETHG_RS16510))	CAETHG_RS16510		Glycerolipid and Glycerophospholipid Metabolism in Bacteria	0	0	1000	2.3.1.15	Glycerol-3-phosphate + Myristoyl-ACP -> ACP + 1-tetradecanoyl-sn-glycerol 3-phosphate		0	0	0	0	0	0	0	0	0	0	0	0	0	0	0	0	0	0	0	0	0	0	0	0	0	0	0	0	0	0	0	0	0	0	0	0	0
rxn10283_c0	isoheptadecanoyl-UDP-glucosyltransferase (monoglucosyl) c0	S_cpd00026[c] + S_cpd15701[c] <=> S_cpd00014[c] + S_cpd15740[c]	(CAETHG_RS11420)	CAETHG_RS11420		Teichoic and lipoteichoic acids biosynthesis	1	-1000	1000		UDP-glucose + 1,2-Diisoheptadecanoyl-sn-glycerol <=> UDP + Monoglucosyl-1,2 diisoheptadecanoylglycerol		0	0	0	0	0	0	0	0	0	0	0	0	0	0	0	0	0	0	0	0	0	0	0	0	0	0	0	0	0	0	0	0	0	0	0	0	0
rxn05201_c0	Hypoxanthine ion-coupled transport c0	S_cpd00067[e] + S_cpd00226[e] <=> S_cpd00067[c] + S_cpd00226[c]	((CAETHG_RS14455) or (CAETHG_RS02195))	CAETHG_RS02195 CAETHG_RS14455		Purine utilisation	1	-1000	1000		H+ + HYXN <=> H+ + HYXN		0	0	0	0	0	0	0	0	0	0	0	0	0	0	0	0	0	0	0	0	0	0	0	0	0	0	0	0	0	0	0	0	0	0	0	0	0
rxn10233_c0	anteisoheptadecanoyl-phosphatidylserine decarboxylase c0	2 S_cpd00067[c] + S_cpd15690[c] <=> S_cpd00011[c] + S_cpd15696[c]	(CAETHG_RS10720)	CAETHG_RS10720		Glycerolipid and Glycerophospholipid Metabolism in Bacteria|Bacterial cyanide production and tolerance mechanisms	1	-1000	1000	4.1.1.65	2 H+ + Dianteisoheptadecanoylphosphatidylserine <=> CO2 + Dianteisoheptadecanoylphosphatidylethanolamine		0	0	0	0	0	0	0	0	0	0	0	0	0	0	0	0	0	0	0	0	0	0	0	0	0	0	0	0	0	0	0	0	0	0	0	0	0
rxn02789_c0	2-Isopropylmalate hydro-lyase c0	S_cpd01646[c] <=> S_cpd00001[c] + S_cpd01710[c]	((CAETHG_RS14755) or (CAETHG_RS14750))	CAETHG_RS14750 CAETHG_RS14755		Leucine biosynthesis	1	-1000	1000	4.2.1.33	2-Isopropylmalate <=> H2O + 2-Isopropylmaleate		0.00856853	0.00856853	0.00856853	0.00877752	0.00862078	9.04947e-05	0.00877752	0.00877752	0.00856853	0.00877752	0.00872527	9.04947e-05	0.00856853	0.00877752	0.00867302	0.000104494	0.00877752	0.00856853	0.00867302	0.000104494	0.00856853	0.00856853	0.00856853	0.00856853	0	0.00877752	0.00877752	0.00877752	0.00898651	0.00882976	9.04947e-05	0.00877752	0.00877752	0.00877752	0	0.00417977	0.00409617
rxn08180_c0	Biotin synthase c0	S_cpd00017[c] + S_cpd00074[c] + S_cpd01311[c] -> S_cpd00060[c] + S_cpd00067[c] + S_cpd00104[c] + S_cpd03091[c]	(CAETHG_RS01605)	CAETHG_RS01605		YgfZ|Biotin biosynthesis	0	0	1000	2.8.1.6	S-Adenosyl-L-methionine + S + Dethiobiotin -> L-Methionine + H+ + BIOT + 5-Deoxyadenosine		0	0	0	0	0	0	0	0	0	0	0	0	0	0	0	0	0	0	0	0	0	0	0	0	0	0	0	0	0	0	0	0	0	0	0	0	0
rxn01331_c0	D-erythrose 4-phosphate:NAD+ oxidoreductase c0	S_cpd00001[c] + S_cpd00003[c] + S_cpd00236[c] -> S_cpd00004[c] + 2 S_cpd00067[c] + S_cpd02147[c]	((CAETHG_RS08515) or (CAETHG_RS16815))	CAETHG_RS08515 CAETHG_RS16815		Calvin-Benson cycle|Pyridoxin (Vitamin B6) Biosynthesis|Glutaredoxins|Redox-dependent regulation of nucleus processes|Glycolysis and Gluconeogenesis|Entner-Doudoroff Pathway	0	0	1000	1.2.1.72	H2O + NAD + D-Erythrose4-phosphate -> NADH + 2 H+ + 4-Phosphoerythronate		0	0	0	0	0	0	0	0	0	0	0	0	0	0	0	0	0	0	0	0	0	0	0	0	0	0	0	0	0	0	0	0	0	0	0	0	0
rxn10042_c0	ATP synthase (four protons for one ATP) c0	S_cpd00008[c] + S_cpd00009[c] + 4 S_cpd00067[e] -> S_cpd00001[c] + S_cpd00002[c] + 3 S_cpd00067[c]	(() and () and (CAETHG_RS11540) and (CAETHG_RS11520) and (CAETHG_RS11555) and (CAETHG_RS11550) and () and () and (CAETHG_RS11560))	CAETHG_RS11520 CAETHG_RS11540 CAETHG_RS11550 CAETHG_RS11555 CAETHG_RS11560		ATPase	0	0	1000	3.6.3.14	ADP + Phosphate + 4 H+ -> H2O + ATP + 3 H+		7.54811	7.36727	7.32447	7.54629	7.44653	0.101798	9.45079	9.58968	9.69634	9.24963	9.49661	0.167071	8.53324	8.12442	8.32883	0.204409	10.6061	10.1822	10.3942	0.211929	11.808	11.7854	12.1608	11.9181	0.171877	11.7775	11.3032	12.7682	11.7894	11.9096	0.53312	16.9329	19.6932	18.3131	1.38017	7.61589	8.1525
rxn00800_c0	N6-(1,2-Dicarboxyethyl)AMP AMP-lyase c0	S_cpd02375[c] <=> S_cpd00018[c] + S_cpd00106[c]	(CAETHG_RS16795)	CAETHG_RS16795		De Novo Purine Biosynthesis|Purine conversions	1	-1000	1000	4.3.2.2	Adenylosuccinate <=> AMP + Fumarate		0.00427104	0.00427104	0.00427104	0.00437521	0.00429708	4.51076e-05	0.00437521	0.00437521	0.00427104	0.00437521	0.00434917	4.51076e-05	0.00427104	0.00437521	0.00432312	5.20858e-05	0.00437521	0.00427104	0.00432312	5.20858e-05	0.00427104	0.00427104	0.00427104	0.00427104	1.07185e-13	0.00437521	0.00437521	0.00437521	0.00447938	0.00440125	4.51076e-05	0.00437521	0.00437521	0.00437521	5.68434e-14	0.00208343	0.00204176
rxn01343_c0	ATP:Sedoheptulose 7-phosphate 1-phosphotransferase c0	S_cpd00002[c] + S_cpd00238[c] -> S_cpd00008[c] + S_cpd00349[c]	((CAETHG_RS03075) or (CAETHG_RS12015))	CAETHG_RS03075 CAETHG_RS12015		Glycolysis and Gluconeogenesis, including Archaeal enzymes|Hexitol degradation|N-Acetyl-Galactosamine and Galactosamine utilisation|Glycolysis and Gluconeogenesis|D-Tagatose and Galactitol utilisation	0	0	1000	2.7.1.11	ATP + Sedoheptulose7-phosphate -> ADP + Sedoheptulose 1,7-bisphosphate		0	0	0	0	0	0	0	0	0	0	0	0	0	0	0	0	0	0	0	0	0	0	0	0	0	0	0	0	0	0	0	0	0	0	0	0	0
rxn01520_c0	5,10-Methylenetetrahydrofolate:dUMP C-methyltransferase c0	S_cpd00125[c] + S_cpd00299[c] -> S_cpd00298[c] + S_cpd00330[c]	(CAETHG_RS01880)	CAETHG_RS01880		Folate biosynthesis	0	0	1000	2.1.1.45	5-10-Methylenetetrahydrofolate + dUMP -> dTMP + Dihydrofolate		0.00120778	0.00120778	0.00120778	0.00123724	0.00121514	1.27557e-05	0.00123724	0.00123724	0.00120778	0.00123724	0.00122987	1.27557e-05	0.00120778	0.00123724	0.00122251	1.4729e-05	0.00123724	0.00120778	0.00122251	1.4729e-05	0.00120778	0.00120778	0.00120778	0.00120778	0	0.00123724	0.00123724	0.00123724	0.00126669	0.0012446	1.27557e-05	0.00123724	0.00123724	0.00123724	0	0.00058916	0.000577377
rxn05234_c0	Ribonucleotide reductase: GTP c0	S_cpd00038[c] + S_cpd11421[c] -> S_cpd00001[c] + S_cpd00241[c] + S_cpd11420[c]	(CAETHG_RS11260)	CAETHG_RS11260		Ribonucleotide reduction	0	0	1000	1.17.4.2	GTP + trdrd -> H2O + dGTP + trdox		0.000504218	0.000504218	0.000504218	0.000516516	0.000507293	5.32519e-06	0.000516516	0.000516516	0.000504218	0.000516516	0.000513442	5.32519e-06	0.000504218	0.000516516	0.000510367	6.149e-06	0.000516516	0.000504218	0.000510367	6.149e-06	0.000504218	0.000504218	0.000504218	0.000504218	0	0.000516516	0.000516516	0.000516516	0.000528814	0.000519591	5.32519e-06	0.000516516	0.000516516	0.000516516	0	0.00024596	0.000241041
rxn08783_c0	D-lactate dehydrogenase c0	S_cpd00221[c] + S_cpd15560[c] -> S_cpd00020[c] + S_cpd15561[c]	(CAETHG_RS05500)	CAETHG_RS05500		Fermentations: Lactate|Lactate utilisation|Respiratory dehydrogenases 1|Fermentations: Mixed acid	0	0	1000	1.1.2.4	D-Lactate + Ubiquinone-8 -> Pyruvate + Ubiquinol-8		0	0	0	0	0	0	0	0	0	0	0	0	0	0	0	0	0	0	0	0	0	0	0	0	0	0	0	0	0	0	0	0	0	0	0	0	0
rxn10286_c0	isopentadecanoyl-UDP-glucosyltransferase (monoglucosyl) c0	S_cpd00026[c] + S_cpd15704[c] <=> S_cpd00014[c] + S_cpd15743[c]	(CAETHG_RS11420)	CAETHG_RS11420		Teichoic and lipoteichoic acids biosynthesis	1	-1000	1000		UDP-glucose + 1,2-Diisopentadecanoyl-sn-glycerol <=> UDP + Monoglucosyl-1,2 diisopentadecanoylglycerol		0	0	0	0	0	0	0	0	0	0	0	0	0	0	0	0	0	0	0	0	0	0	0	0	0	0	0	0	0	0	0	0	0	0	0	0	0
rxn00322_c0	L-Lysine carboxy-lyase c0	S_cpd00039[c] + S_cpd00067[c] -> S_cpd00011[c] + S_cpd01155[c]	(CAETHG_RS06350)	CAETHG_RS06350		Acid resistance mechanisms|Polyamine Metabolism|Arginine and Ornithine Degradation	0	0	1000	4.1.1.18	L-Lysine + H+ -> CO2 + Cadaverine		0	0	0	0	0	0	0	0	0	0	0	0	0	0	0	0	0	0	0	0	0	0	0	0	0	0	0	0	0	0	0	0	0	0	0	0	0
rxn10342_c0	isohexadecanoyl-cardiolipin synthase c0	2 S_cpd15727[c] <=> S_cpd00100[c] + S_cpd15799[c]	((CAETHG_RS14670) or (CAETHG_RS04280))	CAETHG_RS04280 CAETHG_RS14670		Glycerolipid and Glycerophospholipid Metabolism in Bacteria	1	-1000	1000		2 Diisohexadecanoylphosphatidylglycerol <=> Glycerol + Isohexadecanoylcardiolipin (B. subtilis)		0	0	0	0	0	0	0	0	0	0	0	0	0	0	0	0	0	0	0	0	0	0	0	0	0	0	0	0	0	0	0	0	0	0	0	0	0
rxn05426_c0	12-methyl-3-oxo-tridecanoyl-ACP:NADP+ oxidoreductase c0	S_cpd00005[c] + S_cpd00067[c] + S_cpd11562[c] <=> S_cpd00006[c] + S_cpd11563[c]	((CAETHG_RS08435) or (CAETHG_RS00375) or (CAETHG_RS00860) or (CAETHG_RS04365) or (CAETHG_RS06705) or (CAETHG_RS03500) or (CAETHG_RS04680) or (CAETHG_RS09990))	CAETHG_RS00375 CAETHG_RS00860 CAETHG_RS03500 CAETHG_RS04365 CAETHG_RS04680 CAETHG_RS06705 CAETHG_RS08435 CAETHG_RS09990		mycolic acid synthesis|Fatty Acid Biosynthesis FASII	1	-1000	1000	1.1.1.0	NADPH + H+ + 12-methyl-3-oxo-tridecanoyl-ACP <=> NADP + 12-methyl-3-hydroxy-tridecanoyl-ACP		0	0	0	0	0	0	0	0	0	0	0	0	0	0	0	0	0	0	0	0	0	0	0	0	0	0	0	0	0	0	0	0	0	0	0	0	0
rxn02314_c0	ATP:D-tagatose-6-phosphate 1-phosphotransferase c0	S_cpd00002[c] + S_cpd00805[c] <=> S_cpd00008[c] + S_cpd02371[c]	(((CAETHG_RS03075) or (CAETHG_RS12015)) or (() and (CAETHG_RS00685)))	CAETHG_RS00685 CAETHG_RS03075 CAETHG_RS12015		Fructose utilisation	1	-1000	1000	2.7.1.11,2.7.1.144,2.7.1.145,2.7.1.56	ATP + D-Tagatose 6-phosphate <=> ADP + D-Tagatose 1,6-biphosphate		0	0	0	0	0	0	0	0	0	0	0	0	0	0	0	0	0	0	0	0	0	0	0	0	0	0	0	0	0	0	0	0	0	0	0	0	0
rxn00179_c0	ATP:L-glutamate 5-phosphotransferase c0	S_cpd00002[c] + S_cpd00023[c] + S_cpd00067[c] -> S_cpd00008[c] + S_cpd02097[c]	(CAETHG_RS13230)	CAETHG_RS13230		Proline biosynthesis	0	0	1000	2.7.2.11	ATP + L-Glutamate + H+ -> ADP + L-Glutamyl 5-phosphate		0.0130905	0.0130905	0.0130905	0.0134097	0.0131703	0.000138252	0.0134097	0.0134097	0.0130905	0.0134097	0.0133299	0.000138252	0.0130905	0.0134097	0.0132501	0.00015964	0.0134097	0.0130905	0.0132501	0.00015964	0.0130905	0.0130905	0.0130905	0.0130905	0	0.0134097	0.0134097	0.0134097	0.013729	0.0134896	0.000138252	0.0134097	0.0134097	0.0134097	0	0.00638559	0.00625788
rxn05307_c0	SERt2 c0	S_cpd00054[e] + S_cpd00067[e] <=> S_cpd00054[c] + S_cpd00067[c]	((CAETHG_RS12240) or (CAETHG_RS09250) or (CAETHG_RS14390) or (CAETHG_RS19125))	CAETHG_RS09250 CAETHG_RS12240 CAETHG_RS14390 CAETHG_RS19125		Transport Reactions	1	-1000	1000	proton	L-Serine + H+ <=> L-Serine + H+		0	0	0	0	0	0	0	0	0	0	0	0	0	0	0	0	0	0	0	0	0	0	0	0	0	0	0	0	0	0	0	0	0	0	0	0	0
rxn01465_c0	(S)-Dihydroorotate amidohydrolase c0	S_cpd00001[c] + S_cpd00282[c] <=> S_cpd00067[c] + S_cpd00343[c]	((CAETHG_RS07690) or (CAETHG_RS04780))	CAETHG_RS04780 CAETHG_RS07690		De Novo Pyrimidine Synthesis|Allantoin degradation|YgfZ|Zinc regulated enzymes	1	-1000	1000	3.5.2.3	H2O + S-Dihydroorotate <=> H+ + N-Carbamoyl-L-aspartate		-0.00983736	-0.00983736	-0.00983736	-0.0100773	-0.00989734	0.000103895	-0.0100773	-0.0100773	-0.00983736	-0.0100773	-0.0100173	0.000103895	-0.00983736	-0.0100773	-0.00995733	0.000119968	-0.0100773	-0.00983736	-0.00995733	0.000119968	-0.00983736	-0.00983736	-0.00983736	-0.00983736	0	-0.0100773	-0.0100773	-0.0100773	-0.0103172	-0.0101373	0.000103895	-0.0100773	-0.0100773	-0.0100773	0	-0.00479871	-0.00470274
rxn05364_c0	6-methyl-3-oxo-octanoyl-ACP:NADP+ oxidoreductase c0	S_cpd00005[c] + S_cpd00067[c] + S_cpd11500[c] <=> S_cpd00006[c] + S_cpd11501[c]	((CAETHG_RS08435) or (CAETHG_RS00375) or (CAETHG_RS00860) or (CAETHG_RS04365) or (CAETHG_RS06705) or (CAETHG_RS03500) or (CAETHG_RS04680) or (CAETHG_RS09990))	CAETHG_RS00375 CAETHG_RS00860 CAETHG_RS03500 CAETHG_RS04365 CAETHG_RS04680 CAETHG_RS06705 CAETHG_RS08435 CAETHG_RS09990		mycolic acid synthesis|Fatty Acid Biosynthesis FASII	1	-1000	1000	1.1.1.0	NADPH + H+ + 6-methyl-3-oxo-octanoyl-ACP <=> NADP + 6-methyl-3-hydroxy-octanoyl-ACP		0	0	0	0	0	0	0	0	0	0	0	0	0	0	0	0	0	0	0	0	0	0	0	0	0	0	0	0	0	0	0	0	0	0	0	0	0
rxn00863_c0	L-Histidinal:NAD+ oxidoreductase c0	S_cpd00001[c] + S_cpd00003[c] + S_cpd01324[c] -> S_cpd00004[c] + 2 S_cpd00067[c] + S_cpd00119[c]	(CAETHG_RS16000)	CAETHG_RS16000		Histidine Biosynthesis	0	0	1000	1.1.1.23	H2O + NAD + L-Histidinal -> NADH + 2 H+ + L-Histidine		0.000822232	0.000822232	0.000822232	0.000842286	0.000827245	8.68382e-06	0.000842286	0.000842286	0.000822232	0.000842286	0.000837272	8.68382e-06	0.000822232	0.000842286	0.000832259	1.00272e-05	0.000842286	0.000822232	0.000832259	1.00272e-05	0.000822232	0.000822232	0.000822232	0.000822232	1.0842e-19	0.000842286	0.000842286	0.000842286	0.000862341	0.0008473	8.68382e-06	0.000842286	0.000842286	0.000842286	0	0.000401089	0.000393067
rxn10279_c0	isohexadecanoyl-UDP-glucosyltransferase (diglucosyl) c0	S_cpd00026[c] + S_cpd15745[c] <=> S_cpd00014[c] + S_cpd15736[c]	(CAETHG_RS11420)	CAETHG_RS11420		Teichoic and lipoteichoic acids biosynthesis	1	-1000	1000		UDP-glucose + Monoglucosyl-1,2 diisohexadecanoylglycerol <=> UDP + Diglucosyl-1,2 diisohexadecanoylglycerol		0	0	0	0	0	0	0	0	0	0	0	0	0	0	0	0	0	0	0	0	0	0	0	0	0	0	0	0	0	0	0	0	0	0	0	0	0
rxn00223_c0	xylose isomerase c0	S_cpd00027[c] <=> S_cpd00082[c]	(CAETHG_RS19290)	CAETHG_RS19290		Fructose utilisation	1	-1000	1000	5.3.1.5	D-Glucose <=> D-Fructose		0	0	0	0	0	0	0	0	0	0	0	0	0	0	0	0	0	0	0	0	0	0	0	0	0	0	0	0	0	0	0	0	0	0	0	0	0
rxn03150_c0	alpha-ribazole 5-phosphate phosphatase c0	S_cpd00001[c] + S_cpd02904[c] -> S_cpd00009[c] + S_cpd00067[c] + S_cpd03423[c]	(CAETHG_RS02210)	CAETHG_RS02210		Cobalamin synthesis|Coenzyme B12 biosynthesis	0	0	1000	3.1.3.73	H2O + alpha-Ribazole 5-phosphate -> Phosphate + H+ + alpha-Ribazole		0	0	0	0	0	0	0	0	0	0	0	0	0	0	0	0	0	0	0	0	0	0	0	0	0	0	0	0	0	0	0	0	0	0	0	0	0
rxn01800_c0	Deoxycytidine aminohydrolase c0	S_cpd00001[c] + S_cpd00067[c] + S_cpd00654[c] -> S_cpd00013[c] + S_cpd00412[c]	(CAETHG_RS19235)	CAETHG_RS19235		Pyrimidine conversions	0	0	1000	3.5.4.14,3.5.4.5	H2O + H+ + Deoxycytidine -> NH3 + Deoxyuridine		0	0	0	0	0	0	0	0	0	0	0	0	0	0	0	0	0	0	0	0	0	0	0	0	0	0	0	0	0	0	0	0	0	0	0	0	0
rxn10217_c0	isopentadecanoyl-1-acylglycerol-3-phosphate O-acyltransferase c0	S_cpd11437[c] + S_cpd15674[c] -> S_cpd00010[c] + S_cpd15680[c]	((CAETHG_RS13530) or (CAETHG_RS08580))	CAETHG_RS08580 CAETHG_RS13530		Phosphate metabolism|Glycerolipid and Glycerophospholipid Metabolism in Bacteria	0	0	1000	2.3.1.51	fa3coa + 1-isopentadecanoyl-sn-glycerol 3-phosphate -> CoA + 1,2-diisopentadecanoyl-sn-glycerol 3-phosphate		0	0	0	0	0	0	0	0	0	0	0	0	0	0	0	0	0	0	0	0	0	0	0	0	0	0	0	0	0	0	0	0	0	0	0	0	0
rxn09449_c0	fatty-acid--CoA ligase (octadecanoate) c0	S_cpd00002[c] + S_cpd00010[c] + S_cpd00067[c] + S_cpd01080[c] -> S_cpd00012[c] + S_cpd00018[c] + S_cpd00327[c]	(CAETHG_RS08635)	CAETHG_RS08635		Fatty acid degradation regulons|Unsaturated Fatty Acid Metabolism|Carbonate Biomineralization|n-Phenylalkanoic acid degradation|Biotin biosynthesis	0	0	1000	6.2.1.3	ATP + CoA + H+ + ocdca -> PPi + AMP + strcoa		0	0	0	0	0	0	0	0	0	0	0	0	0	0	0	0	0	0	0	0	0	0	0	0	0	0	0	0	0	0	0	0	0	0	0	0	0
rxn10168_c0	Potassium ABC transporter c0	S_cpd00001[c] + S_cpd00002[c] + S_cpd00205[e] -> S_cpd00008[c] + S_cpd00009[c] + S_cpd00067[c] + S_cpd00205[c]	((CAETHG_RS08720) or (CAETHG_RS08710) or (CAETHG_RS08715))	CAETHG_RS08710 CAETHG_RS08715 CAETHG_RS08720		P-type ATPase transporter potassium (TC 3.A.3.7.1)|Potassium homeostasis	0	0	1000		H2O + ATP + K+ -> ADP + Phosphate + H+ + K+		0	0	0	0	0	0	0	0	0	0	0	0	0	0	0	0	0	0	0	0	0	0	0	0	0	0	0	0	0	0	0	0	0	0	0	0	0
cpd00205_ext_b		S_cpd00205[e] <=>				Exchange Reactions	1	-1000	0		K+ <=>		-0.00783793	-0.00783793	-0.00783793	-0.0080291	-0.00788572	8.27786e-05	-0.0080291	-0.0080291	-0.00783793	-0.0080291	-0.00798131	8.27786e-05	-0.00783793	-0.0080291	-0.00793351	9.55845e-05	-0.0080291	-0.00783793	-0.00793351	9.55845e-05	-0.00783793	-0.00783793	-0.00783793	-0.00783793	0	-0.0080291	-0.0080291	-0.0080291	-0.00822027	-0.00807689	8.27786e-05	-0.0080291	-0.0080291	-0.0080291	0	-0.00382338	-0.00374691
rxn03436_c0	(S)-2-Aceto-2-hydroxybutanoate:NADP+ oxidoreductase (isomerizing) c0	S_cpd00498[c] <=> S_cpd10162[c]	((CAETHG_RS00580) or (CAETHG_RS17845))	CAETHG_RS00580 CAETHG_RS17845		Isoleucine Biosynthesis	1	-1000	1000	1.1.1.86	2-Aceto-2-hydroxybutanoate <=> (R)-3-Hydroxy-3-methyl-2-oxopentanoate		0.00708964	0.00708964	0.00708964	0.00726256	0.00713287	7.48757e-05	0.00726256	0.00726256	0.00708964	0.00726256	0.00721933	7.48757e-05	0.00708964	0.00726256	0.0071761	8.6459e-05	0.00726256	0.00708964	0.0071761	8.6459e-05	0.00708964	0.00708964	0.00708964	0.00708964	0	0.00726256	0.00726256	0.00726256	0.00743548	0.00730579	7.48757e-05	0.00726256	0.00726256	0.00726256	0	0.00345836	0.00338919
rxn08756_c0	1-hydroxy-2-methyl-2-(E)-butenyl 4-diphosphate reductase (ipdp) c0	S_cpd00004[c] + S_cpd00067[c] + S_cpd08615[c] -> S_cpd00001[c] + S_cpd00003[c] + S_cpd00113[c]	(CAETHG_RS01035)	CAETHG_RS01035		Methylerythritol Phosphate Pathway	0	0	1000	1.17.1.2	NADH + H+ + 1-Hydroxy-2-methyl-2-butenyl 4-diphosphate -> H2O + NAD + Isopentenyldiphosphate		0	0	0	0	0	0	0	0	0	0	0	0	0	0	0	0	0	0	0	0	0	0	0	0	0	0	0	0	0	0	0	0	0	0	0	0	0
rxn00423_c0	serine O-acetyltransferase c0	S_cpd00022[c] + S_cpd00054[c] -> S_cpd00010[c] + S_cpd00722[c]	(CAETHG_RS08590)	CAETHG_RS08590		Vibrio Polysaccharide (VPS) Biosynthesis|Methionine Biosynthesis|Cysteine Biosynthesis	0	0	1000	2.3.1.30	Acetyl-CoA + L-Serine -> CoA + O-Acetyl-L-serine		0	0	0	0	0	0	0	0	0	0	0	0	0	0	0	0	0	0	0	0	0	0	0	0	0	0	0	0	0	0	0	0	0	0	0	0	0
rxn05430_c0	14-methyl-3-oxo-pentadecanoyl-ACP:NADP+ oxidoreductase c0	S_cpd00005[c] + S_cpd00067[c] + S_cpd11566[c] <=> S_cpd00006[c] + S_cpd11567[c]	((CAETHG_RS08435) or (CAETHG_RS00375) or (CAETHG_RS00860) or (CAETHG_RS04365) or (CAETHG_RS06705) or (CAETHG_RS03500) or (CAETHG_RS04680) or (CAETHG_RS09990))	CAETHG_RS00375 CAETHG_RS00860 CAETHG_RS03500 CAETHG_RS04365 CAETHG_RS04680 CAETHG_RS06705 CAETHG_RS08435 CAETHG_RS09990		mycolic acid synthesis|Fatty Acid Biosynthesis FASII	1	-1000	1000	1.1.1.0	NADPH + H+ + 14-methyl-3-oxo-pentadecanoyl-ACP <=> NADP + 14-methyl-3-hydroxy-pentadecanoyl-ACP		0	0	0	0	0	0	0	0	0	0	0	0	0	0	0	0	0	0	0	0	0	0	0	0	0	0	0	0	0	0	0	0	0	0	0	0	0
rxn10272_c0	myristoyl-UDP-glucosyltransferase (diglucosyl) c0	S_cpd00026[c] + S_cpd15738[c] <=> S_cpd00014[c] + S_cpd15729[c]	(CAETHG_RS11420)	CAETHG_RS11420		Teichoic and lipoteichoic acids biosynthesis	1	-1000	1000		UDP-glucose + Monoglucosyl-1,2 dimyristoylglycerol <=> UDP + Diglucosyl-1,2 dimyristoylglycerol		0	0	0	0	0	0	0	0	0	0	0	0	0	0	0	0	0	0	0	0	0	0	0	0	0	0	0	0	0	0	0	0	0	0	0	0	0
rxn03248_c0	Hexanoyl-CoA:acetyl-CoA C-acyltransferase c0	S_cpd00022[c] + S_cpd03124[c] <=> S_cpd00010[c] + S_cpd03121[c]	(CAETHG_RS02035)	CAETHG_RS02035		Isobutyryl-CoA to Propionyl-CoA Module|Isoleucine degradation|Branched chain amino acid degradation regulons	1	-1000	1000	2.3.1.16	Acetyl-CoA + Hexanoyl-CoA <=> CoA + 3-Oxooctanoyl-CoA		0	0	0	0	0	0	0	0	0	0	0	0	0	0	0	0	0	0	0	0	0	0	0	0	0	0	0	0	0	0	0	0	0	0	0	0	0
rxn08307_c0	CDP-diacylglycerol synthetase (n-C14:0) c0	S_cpd00052[c] + S_cpd15522[c] <=> S_cpd00012[c] + S_cpd15423[c]	(CAETHG_RS16645)	CAETHG_RS16645		Glycerolipid and Glycerophospholipid Metabolism in Bacteria	1	-1000	1000	2.7.7.41	CTP + 1,2-ditetradecanoyl-sn-glycerol 3-phosphate <=> PPi + CDP-1,2-ditetradecanoylglycerol		0	0	0	0	0	0	0	0	0	0	0	0	0	0	0	0	0	0	0	0	0	0	0	0	0	0	0	0	0	0	0	0	0	0	0	0	0
rxn02201_c0	2-Amino-4-hydroxy-6-hydroxymethyl-7,8-dihydropteridine- c0	S_cpd00443[c] + S_cpd02920[c] -> S_cpd00012[c] + S_cpd00683[c]	(CAETHG_RS13400)	CAETHG_RS13400		Folate Biosynthesis|Folate Biosynthesis (Phoenix Copy)|YgfZ	0	0	1000	2.5.1.15	ABEE + 2-Amino-4-hydroxy-6-hydroxymethyl-7-8-dihydropteridinediphosphate -> PPi + Dihydropteroate		0	0	0	0	0	0	0	0	0	0	0	0	0	0	0	0	0	0	0	0	0	0	0	0	0	0	0	0	0	0	0	0	0	0	0	0	0
rxn05555_c0	iron (II) transport via ABC system c0	S_cpd00001[c] + S_cpd00002[c] + S_cpd10515[e] -> S_cpd00008[c] + S_cpd00009[c] + S_cpd00067[c] + S_cpd10515[c]	((CAETHG_RS01205) or (CAETHG_RS17095))	CAETHG_RS01205 CAETHG_RS17095		Transport of Iron|Campylobacter Iron Metabolism|Iron acquisition in Vibrio	0	0	1000		H2O + ATP + Fe2+ -> ADP + Phosphate + H+ + Fe2+		0.000566231	0.000566231	0.000566231	0.000580041	0.000569683	5.98012e-06	0.000580041	0.000580041	0.000566231	0.000580041	0.000576588	5.98012e-06	0.000566231	0.000580041	0.000573136	6.90525e-06	0.000580041	0.000566231	0.000573136	6.90525e-06	0.000566231	0.000566231	0.000566231	0.000566231	0	0.000580041	0.000580041	0.000580041	0.000593852	0.000583494	5.98012e-06	0.000580041	0.000580041	0.000580041	0	0.00027621	0.000270686
cpd10515_ext_b		S_cpd10515[e] <=>				Exchange Reactions	1	-1000	0		Fe2+ <=>		-0.00056623	-0.00056623	-0.00056623	-0.000580041	-0.000569683	5.98012e-06	-0.000580041	-0.000580041	-0.00056623	-0.000580041	-0.000576588	5.98012e-06	-0.00056623	-0.000580041	-0.000573136	6.90525e-06	-0.000580041	-0.00056623	-0.000573136	6.90525e-06	-0.00056623	-0.00056623	-0.00056623	-0.00056623	0	-0.000580041	-0.000580041	-0.000580041	-0.000593851	-0.000583494	5.98012e-06	-0.000580041	-0.000580041	-0.000580041	0	-0.00027621	-0.000270686
rxn00742_c0	L-Cystathionine Lysteine-lyase (deaminating) c0	S_cpd00001[c] + S_cpd00424[c] -> S_cpd00013[c] + S_cpd00084[c] + S_cpd00094[c]	(CAETHG_RS02370)	CAETHG_RS02370		Glycine and Serine utilisation|Methionine Biosynthesis|Cysteine Biosynthesis|Methionine Degradation	0	0	1000	4.4.1.1	H2O + Cystathionine -> NH3 + L-Cysteine + 2-Oxobutyrate		0	0	0	0	0	0	0	0	0	0	0	0	0	0	0	0	0	0	0	0	0	0	0	0	0	0	0	0	0	0	0	0	0	0	0	0	0
rxn02159_c0	L-Histidinol:NAD+ oxidoreductase c0	S_cpd00003[c] + S_cpd00641[c] <=> S_cpd00004[c] + S_cpd00067[c] + S_cpd01324[c]	(CAETHG_RS16000)	CAETHG_RS16000		Histidine Biosynthesis	1	-1000	1000	1.1.1.23	NAD + L-Histidinol <=> NADH + H+ + L-Histidinal		0.000822232	0.000822232	0.000822232	0.000842286	0.000827245	8.68382e-06	0.000842286	0.000842286	0.000822232	0.000842286	0.000837272	8.68382e-06	0.000822232	0.000842286	0.000832259	1.00272e-05	0.000842286	0.000822232	0.000832259	1.00272e-05	0.000822232	0.000822232	0.000822232	0.000822232	0	0.000842286	0.000842286	0.000842286	0.000862341	0.0008473	8.68382e-06	0.000842286	0.000842286	0.000842286	0	0.000401089	0.000393067
rxn00727_c0	Chorismate pyruvate-lyase (amino-accepting) c0	S_cpd00053[c] + S_cpd00216[c] -> S_cpd00020[c] + S_cpd00023[c] + S_cpd00067[c] + S_cpd00093[c]	((CAETHG_RS18180) and (CAETHG_RS18175))	CAETHG_RS18175 CAETHG_RS18180		Tryptophan synthesis	0	0	1000	4.1.3.27	L-Glutamine + Chorismate -> Pyruvate + L-Glutamate + H+ + Anthranilate		0	0	0	0	0	0	0	0	0	0	0	0	0	0	0	0	0	0	0	0	0	0	0	0	0	0	0	0	0	0	0	0	0	0	0	0	0
rxn03891_c0	trans-hexaprenyltranstransferase c0	S_cpd00113[c] + S_cpd00906[c] -> S_cpd00012[c] + S_cpd02590[c]	((() and (CAETHG_RS15870)) or (CAETHG_RS09090))	CAETHG_RS09090 CAETHG_RS15870		Proteorhodopsin|Polyprenyl Diphosphate Biosynthesis	0	0	1000	2.5.1.30	Isopentenyldiphosphate + all-trans-Hexaprenyl diphosphate -> PPi + all-trans-Heptaprenyl diphosphate		0	0	0	0	0	0	0	0	0	0	0	0	0	0	0	0	0	0	0	0	0	0	0	0	0	0	0	0	0	0	0	0	0	0	0	0	0
rxn05413_c0	4-methyl-pentanoyl-ACP:malonyl-[acyl-carrier-protein] C-acyltransferase (decarboxylating) c0	S_cpd00067[c] + S_cpd11492[c] + S_cpd11549[c] -> S_cpd00011[c] + S_cpd11493[c] + S_cpd11550[c]	((CAETHG_RS10005) and (CAETHG_RS09985))	CAETHG_RS09985 CAETHG_RS10005		Fatty Acid Biosynthesis FASII	0	0	1000	2.3.1.0	H+ + Malonyl-acyl-carrierprotein + 4-methyl-pentanoyl-ACP -> CO2 + ACP + 6-methyl-3-oxo-heptanoyl-ACP		0	0	0	0	0	0	0	0	0	0	0	0	0	0	0	0	0	0	0	0	0	0	0	0	0	0	0	0	0	0	0	0	0	0	0	0	0
rxn04385_c0	L-threonine-O-3-phosphate carboxy-lyase c0	S_cpd00067[c] + S_cpd08928[c] -> S_cpd00011[c] + S_cpd02547[c]	(CAETHG_RS05405)	CAETHG_RS05405		Cobalamin synthesis|Coenzyme B12 biosynthesis	0	0	1000	4.1.1.81	H+ + L-Threonine phosphate -> CO2 + (R)-1-Aminopropan-2-yl phosphate		0	0	0	0	0	0	0	0	0	0	0	0	0	0	0	0	0	0	0	0	0	0	0	0	0	0	0	0	0	0	0	0	0	0	0	0	0
rxn05348_c0	Decanoyl-[acyl-carrier protein]:malonyl-[acyl-carrier-protein] c0	S_cpd00067[c] + S_cpd11474[c] + S_cpd11492[c] -> S_cpd00011[c] + S_cpd11489[c] + S_cpd11493[c]	((CAETHG_RS10005) and (CAETHG_RS09985))	CAETHG_RS09985 CAETHG_RS10005		Fatty Acid Biosynthesis FASII	0	0	1000	2.3.1.41,2.3.1.85,2.3.1.86,2.3.1.179,2.3.1.180	H+ + Decanoyl-ACP + Malonyl-acyl-carrierprotein -> CO2 + 3-oxododecanoyl-acp + ACP		0	0	0	0	0	0	0	0	0	0	0	0	0	0	0	0	0	0	0	0	0	0	0	0	0	0	0	0	0	0	0	0	0	0	0	0	0
rxn10299_c0	myristoyl-lipoteichoic acid synthesis (n-24), linked, glucose substituted c0	24 S_cpd00026[c] + S_cpd15747[c] <=> 24 S_cpd00014[c] + S_cpd15756[c]	(CAETHG_RS06265)	CAETHG_RS06265		Teichoic and lipoteichoic acids biosynthesis	1	-1000	1000	2.4.1.52	24 UDP-glucose + Myristoyllipoteichoic acid (n-24), linked, unsubstituted <=> 24 UDP + Myristoyllipoteichoic acid (n-24), linked, glucose substituted		0	0	0	0	0	0	0	0	0	0	0	0	0	0	0	0	0	0	0	0	0	0	0	0	0	0	0	0	0	0	0	0	0	0	0	0	0
rxn01300_c0	ATP:L-homoserine O-phosphotransferase c0	S_cpd00002[c] + S_cpd00227[c] <=> S_cpd00008[c] + S_cpd00809[c]	(CAETHG_RS13810)	CAETHG_RS13810		Threonine biosynthesis	1	-1000	1000	2.7.1.39	ATP + L-Homoserine <=> ADP + O-Phospho-L-homoserine		0.0301686	0.0301686	0.0301686	0.0309044	0.0303525	0.000318619	0.0309044	0.0309044	0.0301686	0.0309044	0.0307205	0.000318619	0.0301686	0.0309044	0.0305365	0.00036791	0.0309044	0.0301686	0.0305365	0.00036791	0.0301686	0.0301686	0.0301686	0.0301686	1.07185e-13	0.0309044	0.0309044	0.0309044	0.0316402	0.0310884	0.000318619	0.0309044	0.0309044	0.0309044	0	0.0147164	0.0144221
rxn10264_c0	isohexadecanoyl-CDPdiacylglycerol:sn-glycerol-3-phosphate 3-phosphatidyltransferase c0	S_cpd00080[c] + S_cpd15688[c] <=> S_cpd00046[c] + S_cpd15721[c]	((CAETHG_RS16745) or (CAETHG_RS06675))	CAETHG_RS06675 CAETHG_RS16745		Glycerolipid and Glycerophospholipid Metabolism in Bacteria	1	-1000	1000	2.7.8.5	Glycerol-3-phosphate + CDP-1,2-diisohexadecanoylglycerol <=> CMP + Diisohexadecanoylphosphatidylglycerophosphate		0	0	0	0	0	0	0	0	0	0	0	0	0	0	0	0	0	0	0	0	0	0	0	0	0	0	0	0	0	0	0	0	0	0	0	0	0
rxn10208_c0	isopentadecanoyl-glycerol-3-phosphate O-acyltransferase c0	S_cpd00080[c] + S_cpd11437[c] -> S_cpd00010[c] + S_cpd15674[c]	(() and (CAETHG_RS16510))	CAETHG_RS16510		Glycerolipid and Glycerophospholipid Metabolism in Bacteria	0	0	1000	2.3.1.15	Glycerol-3-phosphate + fa3coa -> CoA + 1-isopentadecanoyl-sn-glycerol 3-phosphate		0	0	0	0	0	0	0	0	0	0	0	0	0	0	0	0	0	0	0	0	0	0	0	0	0	0	0	0	0	0	0	0	0	0	0	0	0
rxn00715_c0	ITP:uridine 5'-phosphotransferase c0	S_cpd00068[c] + S_cpd00249[c] <=> S_cpd00090[c] + S_cpd00091[c]	(CAETHG_RS11755)	CAETHG_RS11755		Pyrimidine conversions	1	-1000	1000	2.7.1.48	ITP + Uridine <=> IDP + UMP		0	0	0	0	0	0	0	0	0	0	0	0	0	0	0	0	0	0	0	0	0	0	0	0	0	0	0	0	0	0	0	0	0	0	0	0	0
rxn01647_c0	Nicotinate D-ribonucleoside:orthophosphate ribosyltransferase c0	S_cpd00009[c] + S_cpd03471[c] <=> S_cpd00218[c] + S_cpd00475[c]	(CAETHG_RS00760)	CAETHG_RS00760		Purine conversions / Pyrimdine conversions	1	-1000	1000	2.4.2.1	Phosphate + Nicotinate D-ribonucleoside <=> Niacin + Ribose 1-phosphate		0	0	0	0	0	0	0	0	0	0	0	0	0	0	0	0	0	0	0	0	0	0	0	0	0	0	0	0	0	0	0	0	0	0	0	0	0
rxn12642_c0	aminopeptidase c0	S_cpd00001[c] + S_cpd11584[c] <=> S_cpd00035[c] + S_cpd00119[c]	(((CAETHG_RS04585) or (CAETHG_RS15660)) or (CAETHG_RS03545) or (CAETHG_RS07155))	CAETHG_RS03545 CAETHG_RS04585 CAETHG_RS07155 CAETHG_RS15660		Recycling of Peptidoglycan Amino Acids|Protein degradation	1	-1000	1000		H2O + Ala-His <=> L-Alanine + L-Histidine		0	0	0	0	0	0	0	0	0	0	0	0	0	0	0	0	0	0	0	0	0	0	0	0	0	0	0	0	0	0	0	0	0	0	0	0	0
rxn05198_c0	Cytidine ion-coupled transport c0	S_cpd00067[e] + S_cpd00367[e] <=> S_cpd00067[c] + S_cpd00367[c]	(CAETHG_RS19245)	CAETHG_RS19245		Deoxyribose and Deoxynucleoside Catabolism	1	-1000	1000		H+ + Cytidine <=> H+ + Cytidine		0	0	0	0	0	0	0	0	0	0	0	0	0	0	0	0	0	0	0	0	0	0	0	0	0	0	0	0	0	0	0	0	0	0	0	0	0
rxn05247_c0	FACOAL140(ISO) c0	S_cpd00002[c] + S_cpd00010[c] + S_cpd00067[c] + S_cpd11430[c] -> S_cpd00012[c] + S_cpd00018[c] + S_cpd11435[c]	(CAETHG_RS08635)	CAETHG_RS08635		Fatty acid degradation regulons|Unsaturated Fatty Acid Metabolism|Carbonate Biomineralization|n-Phenylalkanoic acid degradation|Biotin biosynthesis	0	0	1000	6.2.1.3	ATP + CoA + H+ + fa1 -> PPi + AMP + fa1coa		0	0	0	0	0	0	0	0	0	0	0	0	0	0	0	0	0	0	0	0	0	0	0	0	0	0	0	0	0	0	0	0	0	0	0	0	0
rxn07845_c0	D-glucarate hydro-lyase c0	S_cpd00609[c] -> S_cpd00001[c] + S_cpd02439[c]	(CAETHG_RS03865)	CAETHG_RS03865		D-galactarate, D-glucarate and D-glycerate catabolism	0	0	1000	4.2.1.40	D-Glucarate -> H2O + 2-Dehydro-3-deoxy-D-glucarate		0	0	0	0	0	0	0	0	0	0	0	0	0	0	0	0	0	0	0	0	0	0	0	0	0	0	0	0	0	0	0	0	0	0	0	0	0
rxn09688_c0	deoxyguanosine transport in via proton symport c0	S_cpd00067[e] + S_cpd00277[e] <=> S_cpd00067[c] + S_cpd00277[c]	(CAETHG_RS19245)	CAETHG_RS19245		Deoxyribose and Deoxynucleoside Catabolism	1	-1000	1000		H+ + Deoxyguanosine <=> H+ + Deoxyguanosine		0	0	0	0	0	0	0	0	0	0	0	0	0	0	0	0	0	0	0	0	0	0	0	0	0	0	0	0	0	0	0	0	0	0	0	0	0
rxn05594_c0	Isethionate transport via ABC system c0	S_cpd00001[c] + S_cpd00002[c] + S_cpd03048[e] -> S_cpd00008[c] + S_cpd00009[c] + S_cpd00067[c] + S_cpd03048[c]	(() and ((CAETHG_RS03470) or (CAETHG_RS19320)) and ((CAETHG_RS03465) or (CAETHG_RS19325)))	CAETHG_RS03465 CAETHG_RS03470 CAETHG_RS19320 CAETHG_RS19325		Alkanesulfonate assimilation|Alkanesulfonates utilisation	0	0	1000		H2O + ATP + Isethionate -> ADP + Phosphate + H+ + Isethionate		0	0	0	0	0	0	0	0	0	0	0	0	0	0	0	0	0	0	0	0	0	0	0	0	0	0	0	0	0	0	0	0	0	0	0	0	0
rxn02504_c0	2-Amino-4-hydroxy-6-(D-erythro-1,2,3-trihydroxypropyl)-7,8- c0	S_cpd02961[c] <=> S_cpd00229[c] + S_cpd00954[c]	(CAETHG_RS13415)	CAETHG_RS13415		Folate Biosynthesis|Folate Biosynthesis (Phoenix Copy)|Methanopterin biosynthesis2|Pterin metabolism 3	1	-1000	1000	4.1.2.25	Dihydroneopterin <=> Glycolaldehyde + 6-hydroxymethyl dihydropterin		3.6531e-05	3.6531e-05	3.6531e-05	3.7422e-05	3.67537e-05	3.85814e-07	3.7422e-05	3.7422e-05	3.6531e-05	3.7422e-05	3.71992e-05	3.85814e-07	3.6531e-05	3.7422e-05	3.69765e-05	4.455e-07	3.7422e-05	3.6531e-05	3.69765e-05	4.455e-07	3.6531e-05	3.6531e-05	3.6531e-05	3.6531e-05	0	3.7422e-05	3.7422e-05	3.7422e-05	3.8313e-05	3.76447e-05	3.85814e-07	3.7422e-05	3.7422e-05	3.7422e-05	0	1.782e-05	1.74636e-05
rxn01748_c0	Allantoin amidohydrolase c0	S_cpd00001[c] + S_cpd01092[c] <=> S_cpd00067[c] + S_cpd00388[c]	((CAETHG_RS17860) or (CAETHG_RS17855))	CAETHG_RS17855 CAETHG_RS17860		Allantoin degradation|Allantoin utilisation|Hydantoin metabolism	1	-1000	1000	3.5.2.5	H2O + Allantoin <=> H+ + Allantoate		0	0	0	0	0	0	0	0	0	0	0	0	0	0	0	0	0	0	0	0	0	0	0	0	0	0	0	0	0	0	0	0	0	0	0	0	0
rxn05493_c0	2-oxoglutarate transport in via proton symport c0	S_cpd00024[e] + S_cpd00067[e] <=> S_cpd00024[c] + S_cpd00067[c]	(CAETHG_RS03875)	CAETHG_RS03875		Photorespiration (oxidative C2 cycle)	1	-1000	1000		2-Oxoglutarate + H+ <=> 2-Oxoglutarate + H+		0	0	0	0	0	0	0	0	0	0	0	0	0	0	0	0	0	0	0	0	0	0	0	0	0	0	0	0	0	0	0	0	0	0	0	0	0
cpd00024_ext_b		S_cpd00024[e] <=>				Exchange Reactions	1	0	1000		2-Oxoglutarate <=>		0	0	0	0	0	0	0	0	0	0	0	0	0	0	0	0	0	0	0	0	0	0	0	0	0	0	0	0	0	0	0	0	0	0	0	0	0
rxn10473_c0	chlorideion transport out via diffusion c0	S_cpd00099[e] <=> S_cpd00099[c]	(CAETHG_RS01840)	CAETHG_RS01840		Transport Reactions	1	-1000	1000		Cl <=> Cl		0.000209038	0.000209038	0.000209038	0.000214137	0.000210313	2.20772e-06	0.000214137	0.000214137	0.000209038	0.000214137	0.000212862	2.20772e-06	0.000209038	0.000214137	0.000211588	2.54925e-06	0.000214137	0.000209038	0.000211588	2.54925e-06	0.000209038	0.000209038	0.000209038	0.000209038	0	0.000214137	0.000214137	0.000214137	0.000219236	0.000215412	2.20772e-06	0.000214137	0.000214137	0.000214137	0	0.00010197	9.99306e-05
cpd00099_ext_b		S_cpd00099[e] <=>				Exchange Reactions	1	-1000	0		Cl <=>		-0.000209038	-0.000209038	-0.000209038	-0.000214137	-0.000210313	2.20772e-06	-0.000214137	-0.000214137	-0.000209038	-0.000214137	-0.000212862	2.20772e-06	-0.000209038	-0.000214137	-0.000211588	2.54925e-06	-0.000214137	-0.000209038	-0.000211588	2.54925e-06	-0.000209038	-0.000209038	-0.000209038	-0.000209038	0	-0.000214137	-0.000214137	-0.000214137	-0.000219236	-0.000215412	2.20772e-06	-0.000214137	-0.000214137	-0.000214137	0	-0.00010197	-9.99306e-05
rxn05223_c0	Biotin ABC transporter c0	S_cpd00001[c] + S_cpd00002[c] + S_cpd00104[e] -> S_cpd00008[c] + S_cpd00009[c] + S_cpd00067[c] + S_cpd00104[c]	(CAETHG_RS02415)	CAETHG_RS02415		ECF class transporters|Biotin biosynthesis	0	0	1000		H2O + ATP + BIOT -> ADP + Phosphate + H+ + BIOT		0	0	0	0	0	0	0	0	0	0	0	0	0	0	0	0	0	0	0	0	0	0	0	0	0	0	0	0	0	0	0	0	0	0	0	0	0
rxn05534_c0	Dipeptide transport via ABC system (gly-glu) c0	S_cpd00001[c] + S_cpd00002[c] + S_cpd11592[e] -> S_cpd00008[c] + S_cpd00009[c] + S_cpd00067[c] + S_cpd11592[c]	(CAETHG_RS07520)	CAETHG_RS07520		ABC transporter dipeptide (TC 3.A.1.5.2)	0	0	1000		H2O + ATP + gly-glu-L -> ADP + Phosphate + H+ + gly-glu-L		0	0	0	0	0	0	0	0	0	0	0	0	0	0	0	0	0	0	0	0	0	0	0	0	0	0	0	0	0	0	0	0	0	0	0	0	0
rxn05618_c0	manganese transport in via proton symport c0	S_cpd00030[e] + S_cpd00067[e] -> S_cpd00030[c] + S_cpd00067[c]	((CAETHG_RS18155) or (CAETHG_RS06410) or (CAETHG_RS10095) or (CAETHG_RS07175))	CAETHG_RS06410 CAETHG_RS07175 CAETHG_RS10095 CAETHG_RS18155		Transport of Manganese	0	0	1000		Mn2+ + H+ -> Mn2+ + H+		2.8413e-05	2.8413e-05	2.8413e-05	2.9106e-05	2.85863e-05	3.00078e-07	2.9106e-05	2.9106e-05	2.8413e-05	2.9106e-05	2.89328e-05	3.00078e-07	2.8413e-05	2.9106e-05	2.87595e-05	3.465e-07	2.9106e-05	2.8413e-05	2.87595e-05	3.465e-07	2.8413e-05	2.8413e-05	2.8413e-05	2.8413e-05	0	2.9106e-05	2.9106e-05	2.9106e-05	2.9799e-05	2.92792e-05	3.00078e-07	2.9106e-05	2.9106e-05	2.9106e-05	0	1.386e-05	1.35828e-05
cpd00030_ext_b		S_cpd00030[e] <=>				Exchange Reactions	1	-1000	0		Mn2+ <=>		-2.8413e-05	-2.8413e-05	-2.8413e-05	-2.9106e-05	-2.85863e-05	3.00078e-07	-2.9106e-05	-2.9106e-05	-2.8413e-05	-2.9106e-05	-2.89328e-05	3.00078e-07	-2.8413e-05	-2.9106e-05	-2.87595e-05	3.465e-07	-2.9106e-05	-2.8413e-05	-2.87595e-05	3.465e-07	-2.8413e-05	-2.8413e-05	-2.8413e-05	-2.8413e-05	0	-2.9106e-05	-2.9106e-05	-2.9106e-05	-2.9799e-05	-2.92793e-05	3.00078e-07	-2.9106e-05	-2.9106e-05	-2.9106e-05	0	-1.386e-05	-1.35828e-05
rxn01358_c0	inosine:orthophosphate ribosyltransferase c0	S_cpd00009[c] + S_cpd00067[c] + S_cpd00246[c] <=> S_cpd00226[c] + S_cpd00475[c]	(CAETHG_RS00760)	CAETHG_RS00760		Xanthosine utilisation (xap region)	1	-1000	1000	2.4.2.1,2.4.2.15	Phosphate + H+ + Inosine <=> HYXN + Ribose 1-phosphate		0	0	0	0	0	0	0	0	0	0	0	0	0	0	0	0	0	0	0	0	0	0	0	0	0	0	0	0	0	0	0	0	0	0	0	0	0
rxn00692_c0	5,10-Methylenetetrahydrofolate:glycine hydroxymethyltransferase c0	S_cpd00001[c] + S_cpd00033[c] + S_cpd00125[c] <=> S_cpd00054[c] + S_cpd00087[c]	(CAETHG_RS15910)	CAETHG_RS15910		Serine and Glycine biosynthesis	1	-1000	1000	2.1.2.1	H2O + Glycine + 5-10-Methylenetetrahydrofolate <=> L-Serine + Tetrahydrofolate		0.00745032	0.00745032	0.00745032	0.00763203	0.00749574	7.86849e-05	0.00763203	0.00763203	0.00745032	0.00763203	0.0075866	7.86849e-05	0.00745032	0.00763203	0.00754117	9.08575e-05	0.00763203	0.00745032	0.00754117	9.08575e-05	0.00745032	0.00745032	0.00745032	0.00745032	0	0.00763203	0.00763203	0.00763203	0.00781375	0.00767746	7.86849e-05	0.00763203	0.00763203	0.00763203	0	0.0036343	0.00356161
rxn09108_c0	Phosphatidylglycerol synthase (n-C12:0) c0	S_cpd00080[c] + S_cpd15417[c] <=> S_cpd00046[c] + S_cpd15542[c]	((CAETHG_RS16745) or (CAETHG_RS06675))	CAETHG_RS06675 CAETHG_RS16745		Glycerolipid and Glycerophospholipid Metabolism in Bacteria	1	-1000	1000	2.7.8.5	Glycerol-3-phosphate + CDP-1,2-didodecanoylglycerol <=> CMP + Phosphatidylglycerophosphate didodecanoyl		0	0	0	0	0	0	0	0	0	0	0	0	0	0	0	0	0	0	0	0	0	0	0	0	0	0	0	0	0	0	0	0	0	0	0	0	0
rxn03068_c0	(R)-2,3-Dihydroxy-3-methylbutanoate:NADP+ oxidoreductase c0	S_cpd00006[c] + S_cpd02498[c] <=> S_cpd00005[c] + S_cpd00067[c] + S_cpd02569[c]	((CAETHG_RS00580) or (CAETHG_RS17845))	CAETHG_RS00580 CAETHG_RS17845		Valine biosynthesis	1	-1000	1000	1.1.1.86	NADP + 2,3-Dihydroxy-isovalerate <=> NADPH + H+ + 2-Oxo-3-hydroxyisovalerate		-0.10568	-0.1153	-0.13032	-0.117493	-0.117198	0.00878266	-0.126613	-0.102413	-0.15254	-0.108993	-0.12264	0.0193984	-0.0166234	-0.0170289	-0.0168262	0.000202725	-0.0170289	-0.0166234	-0.0168262	0.000202725	-0.11934	-0.0166234	-0.0867294	-0.0742311	0.0428552	-0.116093	-0.0546484	-0.0176984	-0.0300174	-0.0546143	0.0379059	-0.093453	-0.136798	-0.115126	0.0216727	-0.0534538	-0.0515847
rxn00566_c0	L-Cysteine L-homocysteine-lyase (deaminating) c0	S_cpd00001[c] + S_cpd00084[c] -> S_cpd00013[c] + S_cpd00020[c] + S_cpd00239[c]	(CAETHG_RS02370)	CAETHG_RS02370		Cysteine metabolism	0	0	1000	4.4.1.8	H2O + L-Cysteine -> NH3 + Pyruvate + H2S		0.183646	0.193646	0.203646	0.213003	0.198485	0.0109662	0.0530027	0.0430027	0.0536455	0.0530027	0.0506634	0.00443068	0.203646	0.183003	0.193324	0.0103214	0.0530027	0.0436455	0.0483241	0.0046786	0.193646	0.203646	0.173646	0.190312	0.0124722	0.0530027	0.0430027	0.0530027	0.05236	0.050342	0.00424547	0.243003	0.243003	0.243003	0	0.257144	0.327401
rxn08299_c0	diacylglycerol kinase (n-C18:0) c0	S_cpd00002[c] + S_cpd15311[c] <=> S_cpd00008[c] + S_cpd15526[c]	(CAETHG_RS14270)	CAETHG_RS14270		Glycerolipid and Glycerophospholipid Metabolism in Bacteria	1	-1000	1000	2.7.1.107	ATP + 1,2-Diacyl-sn-glycerol dioctadecanoyl <=> ADP + 1,2-dioctadecanoyl-sn-glycerol 3-phosphate		0	0	0	0	0	0	0	0	0	0	0	0	0	0	0	0	0	0	0	0	0	0	0	0	0	0	0	0	0	0	0	0	0	0	0	0	0
rxn00002_c0	Urea-1-carboxylate amidohydrolase c0	S_cpd00001[c] + 3 S_cpd00067[c] + S_cpd00742[c] -> 2 S_cpd00011[c] + 2 S_cpd00013[c]	(() and (CAETHG_RS00625))	CAETHG_RS00625			0	0	1000	3.5.1.54	H2O + 3 H+ + Allophanate -> 2 CO2 + 2 NH3		0	0	0	0	0	0	0	0	0	0	0	0	0	0	0	0	0	0	0	0	0	0	0	0	0	0	0	0	0	0	0	0	0	0	0	0	0
rxn00654_c0	N-Carbamoyl-beta-alanine amidohydrolase c0	S_cpd00001[c] + 2 S_cpd00067[c] + S_cpd01720[c] -> S_cpd00011[c] + S_cpd00013[c] + S_cpd00085[c]	(CAETHG_RS07205)	CAETHG_RS07205		Hydantoin metabolism|Pyrimidine utilisation|L-2-amino-thiazoline-4-carboxylic acid-Lcysteine conversion	0	0	1000	3.5.1.6	H2O + 2 H+ + 3-Ureidopropanoate -> CO2 + NH3 + beta-Alanine		1.42065e-06	1.42065e-06	1.42065e-06	1.4553e-06	1.42931e-06	1.50039e-08	1.4553e-06	1.4553e-06	1.42065e-06	1.4553e-06	1.44664e-06	1.50039e-08	1.42065e-06	1.4553e-06	1.43798e-06	1.7325e-08	1.4553e-06	1.42065e-06	1.43797e-06	1.7325e-08	1.42065e-06	1.42065e-06	1.42065e-06	1.42065e-06	5.93682e-16	1.4553e-06	1.4553e-06	1.4553e-06	1.48995e-06	1.46396e-06	1.50039e-08	1.4553e-06	1.4553e-06	1.4553e-06	0	6.93e-07	6.7914e-07
rxn09988_c0	alpha-N-arabinofuranosidase c0	2 S_cpd00001[c] + S_cpd12115[c] -> 3 S_cpd00224[c]	(CAETHG_RS10985)	CAETHG_RS10985		L-Arabinose utilisation	0	0	1000	3.2.1.55	2 H2O + Arabinan -> 3 L-Arabinose		0	0	0	0	0	0	0	0	0	0	0	0	0	0	0	0	0	0	0	0	0	0	0	0	0	0	0	0	0	0	0	0	0	0	0	0	0
rxn00505_c0	Isocitrate:NAD+ oxidoreductase (decarboxylating) c0	S_cpd00003[c] + S_cpd00260[c] -> S_cpd00004[c] + S_cpd00011[c] + S_cpd00024[c]	(CAETHG_RS13545)	CAETHG_RS13545		Citric Acid Cycle	0	0	1000	1.1.1.41	NAD + Isocitrate -> NADH + CO2 + 2-Oxoglutarate		0.0310225	0.0310225	0.0310225	0.0317791	0.0312116	0.000327637	0.0317791	0.0317791	0.0310225	0.0317791	0.0315899	0.000327637	0.0310225	0.0317791	0.0314008	0.000378323	0.0317791	0.0310225	0.0314008	0.000378323	0.0310225	0.0310225	0.0310225	0.0310225	6.64349e-18	0.0317791	0.0317791	0.0317791	0.0325358	0.0319683	0.000327637	0.0317791	0.0317791	0.0317791	0	0.0151329	0.0148303
rxn12634_c0	aminopeptidase c0	S_cpd00001[c] + S_cpd11592[c] <=> S_cpd00023[c] + S_cpd00033[c]	(((CAETHG_RS04585) or (CAETHG_RS15660)) or (CAETHG_RS03545) or (CAETHG_RS07155))	CAETHG_RS03545 CAETHG_RS04585 CAETHG_RS07155 CAETHG_RS15660		Recycling of Peptidoglycan Amino Acids|Protein degradation	1	-1000	1000		H2O + gly-glu-L <=> L-Glutamate + Glycine		0	0	0	0	0	0	0	0	0	0	0	0	0	0	0	0	0	0	0	0	0	0	0	0	0	0	0	0	0	0	0	0	0	0	0	0	0
rxn10261_c0	isotetradecanoyl-CDPdiacylglycerol:sn-glycerol-3-phosphate 3-phosphatidyltransferase c0	S_cpd00080[c] + S_cpd15685[c] <=> S_cpd00046[c] + S_cpd15718[c]	((CAETHG_RS16745) or (CAETHG_RS06675))	CAETHG_RS06675 CAETHG_RS16745		Glycerolipid and Glycerophospholipid Metabolism in Bacteria	1	-1000	1000	2.7.8.5	Glycerol-3-phosphate + CDP-1,2-diisotetradecanoylglycerol <=> CMP + Diisotetradecanoylphosphatidylglycerophosphate		0	0	0	0	0	0	0	0	0	0	0	0	0	0	0	0	0	0	0	0	0	0	0	0	0	0	0	0	0	0	0	0	0	0	0	0	0
rxn10232_c0	isoheptadecanoyl-phosphatidylserine decarboxylase c0	2 S_cpd00067[c] + S_cpd15689[c] <=> S_cpd00011[c] + S_cpd15695[c]	(CAETHG_RS10720)	CAETHG_RS10720		Glycerolipid and Glycerophospholipid Metabolism in Bacteria|Bacterial cyanide production and tolerance mechanisms	1	-1000	1000	4.1.1.65	2 H+ + Diisoheptadecanoylphosphatidylserine <=> CO2 + Diisoheptadecanoylphosphatidylethanolamine		0	0	0	0	0	0	0	0	0	0	0	0	0	0	0	0	0	0	0	0	0	0	0	0	0	0	0	0	0	0	0	0	0	0	0	0	0
rxn00300_c0	GTP 7,8-8,9-dihydrolase (pyrophosphate-forming) c0	3 S_cpd00001[c] + S_cpd00038[c] -> S_cpd00012[c] + S_cpd00047[c] + S_cpd00067[c] + S_cpd00957[c]	(CAETHG_RS01435)	CAETHG_RS01435		Riboflavin, FMN and FAD metabolism|YgfZ	0	0	1000	3.5.4.25	3 H2O + GTP -> PPi + Formate + H+ + 2,5-Diamino-6-(5-phosphoribosylamino)-4-pyrimidineone		1.05534e-05	1.05534e-05	1.05534e-05	1.08108e-05	1.06178e-05	1.11457e-07	1.08108e-05	1.08108e-05	1.05534e-05	1.08108e-05	1.07464e-05	1.11457e-07	1.05534e-05	1.08108e-05	1.06821e-05	1.287e-07	1.08108e-05	1.05534e-05	1.06821e-05	1.287e-07	1.05534e-05	1.05534e-05	1.05534e-05	1.05534e-05	0	1.08108e-05	1.08108e-05	1.08108e-05	1.10682e-05	1.08751e-05	1.11457e-07	1.08108e-05	1.08108e-05	1.08108e-05	0	5.148e-06	5.04504e-06
rxn00907_c0	5,10-methylenetetrahydrofolate:NADP+ oxidoreductase c0	S_cpd00006[c] + S_cpd00125[c] <=> S_cpd00005[c] + S_cpd00347[c]	((CAETHG_RS07840) and (CAETHG_RS07840))	CAETHG_RS07840		Wood-Ljungdahl Pathway	1	-1000	1000	1.5.1.5	NADP + 5-10-Methylenetetrahydrofolate <=> NADPH + 5-10-Methenyltetrahydrofolate		-4.97485	-4.91409	-4.61413	-5.04856	-4.88791	0.165082	-6.4168	-6.4584	-6.52857	-6.20156	-6.40133	0.12206	-8.19883	-7.73775	-7.96829	0.230541	-8.69718	-8.39597	-8.54657	0.150609	-10.3222	-10.2329	-10.6524	-10.4025	0.180416	-10.2758	-9.77201	-11.0836	-10.2894	-10.3552	0.469377	-21.2305	-24.9209	-23.0757	1.84522	-9.84861	-10.2808
rxn05619_c0	molybdate transport via ABC system c0	S_cpd00001[c] + S_cpd00002[c] + S_cpd11574[e] -> S_cpd00008[c] + S_cpd00009[c] + S_cpd00067[c] + S_cpd11574[c]	(CAETHG_RS12635)	CAETHG_RS12635		Transport of Molybdenum	0	0	1000		H2O + ATP + Molybdate -> ADP + Phosphate + H+ + Molybdate		2.0295e-07	2.0295e-07	2.0295e-07	2.079e-07	2.04188e-07	2.14341e-09	2.079e-07	2.079e-07	2.0295e-07	2.079e-07	2.06663e-07	2.14341e-09	2.0295e-07	2.079e-07	2.05425e-07	2.475e-09	2.079e-07	2.0295e-07	2.05425e-07	2.475e-09	2.0295e-07	2.0295e-07	2.0295e-07	2.0295e-07	0	2.079e-07	2.079e-07	2.079e-07	2.1285e-07	2.09138e-07	2.14341e-09	2.079e-07	2.079e-07	2.079e-07	0	9.9e-08	9.702e-08
rxn05410_c0	4-methyl-3-oxo-pentanoyl-ACP:NADP+ oxidoreductase c0	S_cpd00005[c] + S_cpd00067[c] + S_cpd11546[c] <=> S_cpd00006[c] + S_cpd11547[c]	((CAETHG_RS08435) or (CAETHG_RS00375) or (CAETHG_RS00860) or (CAETHG_RS04365) or (CAETHG_RS06705) or (CAETHG_RS03500) or (CAETHG_RS04680) or (CAETHG_RS09990))	CAETHG_RS00375 CAETHG_RS00860 CAETHG_RS03500 CAETHG_RS04365 CAETHG_RS04680 CAETHG_RS06705 CAETHG_RS08435 CAETHG_RS09990		mycolic acid synthesis|Fatty Acid Biosynthesis FASII	1	-1000	1000	1.1.1.0	NADPH + H+ + 4-methyl-3-oxo-pentanoyl-ACP <=> NADP + 4-methyl-3-hydroxy-pentanoyl-ACP		0	0	0	0	0	0	0	0	0	0	0	0	0	0	0	0	0	0	0	0	0	0	0	0	0	0	0	0	0	0	0	0	0	0	0	0	0
rxn01269_c0	Prephenate:NADP+ oxidoreductase(decarboxylating) c0	S_cpd00006[c] + S_cpd00219[c] -> S_cpd00005[c] + S_cpd00011[c] + S_cpd00868[c]	(CAETHG_RS04345)	CAETHG_RS04345		Chorismate synthesis	0	0	0	1.3.1.13	NADP + Prephenate -> NADPH + CO2 + p-hydroxyphenylpyruvate		0	0	0	0	0	0	0	0	0	0	0	0	0	0	0	0	0	0	0	0	0	0	0	0	0	0	0	0	0	0	0	0	0	0	0	0	0
rxn04048_c0	cobalt-precorrin-4 methyltransferase c0	S_cpd00017[c] + S_cpd08370[c] <=> S_cpd00019[c] + S_cpd08371[c]	(CAETHG_RS05345)	CAETHG_RS05345		Cobalamin synthesis|Coenzyme B12 biosynthesis	1	-1000	1000	2.1.1.133	S-Adenosyl-L-methionine + Cobalt-precorrin 4 <=> S-Adenosyl-homocysteine + Cobalt-precorrin 5		0	0	0	0	0	0	0	0	0	0	0	0	0	0	0	0	0	0	0	0	0	0	0	0	0	0	0	0	0	0	0	0	0	0	0	0	0
rxn06673_c0	Acetyl-CoA:carbon-dioxide ligase (ADP-forming) c0	S_cpd00022[c] + S_cpd12543[c] -> S_cpd00070[c] + S_cpd12848[c]	((CAETHG_RS09965) and (CAETHG_RS09960))	CAETHG_RS09960 CAETHG_RS09965		Fatty Acid Biosynthesis FASII|Na+ translocating decarboxylases and related biotin-dependent enzymes	0	0	1000	6.4.1.2	Acetyl-CoA + Carboxybiotin-carboxyl-carrier protein -> Malonyl-CoA + Holo-[carboxylase]		0.0617263	0.0617263	0.0617263	0.0632318	0.0621027	0.000651909	0.0632318	0.0632318	0.0617263	0.0632318	0.0628554	0.000651909	0.0617263	0.0632318	0.062479	0.000752759	0.0632318	0.0617263	0.062479	0.000752759	0.0617263	0.0617263	0.0617263	0.0617263	0	0.0632318	0.0632318	0.0632318	0.0647373	0.0636082	0.000651909	0.0632318	0.0632318	0.0632318	0	0.0301104	0.0295082
rxn00790_c0	5-Phosphoribosylamine:pyrophosphate phosphoribosyltransferase c0	S_cpd00001[c] + S_cpd00053[c] + S_cpd00103[c] -> S_cpd00012[c] + S_cpd00023[c] + S_cpd01982[c]	(CAETHG_RS14500)	CAETHG_RS14500		YgfZ|De Novo Purine Biosynthesis	0	0	1000	2.4.2.14	H2O + L-Glutamine + PRPP -> PPi + L-Glutamate + 5-Phosphoribosylamine		0.00878687	0.00878687	0.00878687	0.00900118	0.00884045	9.28006e-05	0.00900118	0.00900118	0.00878687	0.00900118	0.0089476	9.28006e-05	0.00878687	0.00900118	0.00889402	0.000107157	0.00900118	0.00878687	0.00889402	0.000107157	0.00878687	0.00878687	0.00878687	0.00878687	8.64005e-14	0.00900118	0.00900118	0.00900118	0.0092155	0.00905476	9.28006e-05	0.00900118	0.00900118	0.00900118	1.42109e-14	0.00428628	0.00420055
rxn08296_c0	diacylglycerol kinase (n-C14:1) c0	S_cpd00002[c] + S_cpd15308[c] <=> S_cpd00008[c] + S_cpd15523[c]	(CAETHG_RS14270)	CAETHG_RS14270		Glycerolipid and Glycerophospholipid Metabolism in Bacteria	1	-1000	1000	2.7.1.107	ATP + 1,2-Diacyl-sn-glycerol ditetradec-7-enoyl <=> ADP + 1,2-ditetradec-7-enoyl-sn-glycerol 3-phosphate		0	0	0	0	0	0	0	0	0	0	0	0	0	0	0	0	0	0	0	0	0	0	0	0	0	0	0	0	0	0	0	0	0	0	0	0	0
rxn05569_c0	D-glucosamine transport via PEP:Pyr PTS c0	S_cpd00061[c] + S_cpd00276[e] <=> S_cpd00020[c] + S_cpd00288[c]	(() and (CAETHG_RS09185))	CAETHG_RS09185			1	-1000	1000		Phosphoenolpyruvate + GLUM <=> Pyruvate + D-Glucosamine phosphate		0	0	0	0	0	0	0	0	0	0	0	0	0	0	0	0	0	0	0	0	0	0	0	0	0	0	0	0	0	0	0	0	0	0	0	0	0
rxn05574_c0	glucuronate transport in via proton symport c0	S_cpd00067[e] + S_cpd00164[e] <=> S_cpd00067[c] + S_cpd00164[c]	((CAETHG_RS12060) or (CAETHG_RS08620))	CAETHG_RS08620 CAETHG_RS12060		D-Galacturonate utilisation|Alginate metabolism	1	-1000	1000		H+ + Glucuronate <=> H+ + Glucuronate		0	0	0	0	0	0	0	0	0	0	0	0	0	0	0	0	0	0	0	0	0	0	0	0	0	0	0	0	0	0	0	0	0	0	0	0	0
rxn00060_c0	Porphobilinogen ammonia-lyase (polymerizing) c0	S_cpd00001[c] + 4 S_cpd00689[c] -> 4 S_cpd00013[c] + S_cpd00755[c]	(CAETHG_RS05395)	CAETHG_RS05395		Experimental tye|Heme and Siroheme Biosynthesis	0	0	1000	2.5.1.61,4.3.1.8	H2O + 4 Porphobilinogen -> 4 NH3 + Hydroxymethylbilane		0	0	0	0	0	0	0	0	0	0	0	0	0	0	0	0	0	0	0	0	0	0	0	0	0	0	0	0	0	0	0	0	0	0	0	0	0
rxn09202_c0	Phosphatidylserine decarboxylase (n-C18:0) c0	2 S_cpd00067[c] + S_cpd15557[c] <=> S_cpd00011[c] + S_cpd15533[c]	(CAETHG_RS10720)	CAETHG_RS10720		Glycerolipid and Glycerophospholipid Metabolism in Bacteria|Bacterial cyanide production and tolerance mechanisms	1	-1000	1000	4.1.1.65	2 H+ + phosphatidylserine dioctadecanoyl <=> CO2 + phosphatidylethanolamine dioctadecanoyl		0	0	0	0	0	0	0	0	0	0	0	0	0	0	0	0	0	0	0	0	0	0	0	0	0	0	0	0	0	0	0	0	0	0	0	0	0
rxn02473_c0	D-erythro-1-(Imidazol-4-yl)glycerol 3-phosphate hydro-lyase c0	S_cpd02843[c] -> S_cpd00001[c] + S_cpd00930[c]	(CAETHG_RS16005)	CAETHG_RS16005		Histidine Biosynthesis	0	0	1000	4.2.1.19	D-erythro-imidazol-glycerol-phosphate -> H2O + imidazole acetol-phosphate		0.000822232	0.000822232	0.000822232	0.000842286	0.000827245	8.68382e-06	0.000842286	0.000842286	0.000822232	0.000842286	0.000837272	8.68382e-06	0.000822232	0.000842286	0.000832259	1.00272e-05	0.000842286	0.000822232	0.000832259	1.00272e-05	0.000822232	0.000822232	0.000822232	0.000822232	1.0842e-19	0.000842286	0.000842286	0.000842286	0.000862341	0.0008473	8.68382e-06	0.000842286	0.000842286	0.000842286	0	0.000401089	0.000393067
rxn00834_c0	IMP:NAD+ oxidoreductase c0	S_cpd00001[c] + S_cpd00003[c] + S_cpd00114[c] <=> S_cpd00004[c] + S_cpd00067[c] + S_cpd00497[c]	((CAETHG_RS11860) or (CAETHG_RS07625) or (CAETHG_RS04265))	CAETHG_RS04265 CAETHG_RS07625 CAETHG_RS11860		Purine conversions	1	-1000	1000	1.1.1.205	H2O + NAD + IMP <=> NADH + H+ + XMP		0.00532893	0.00532893	0.00532893	0.0054589	0.00536142	5.62803e-05	0.0054589	0.0054589	0.00532893	0.0054589	0.00542641	5.62803e-05	0.00532893	0.0054589	0.00539392	6.4987e-05	0.0054589	0.00532893	0.00539392	6.4987e-05	0.00532893	0.00532893	0.00532893	0.00532893	0	0.0054589	0.0054589	0.0054589	0.00558888	0.0054914	5.62803e-05	0.0054589	0.0054589	0.0054589	0	0.00259948	0.00254749
rxn05293_c0	MECDPDH c0	S_cpd00004[c] + S_cpd00067[c] + S_cpd08301[c] -> S_cpd00001[c] + S_cpd00003[c] + S_cpd08615[c]	(CAETHG_RS16660)	CAETHG_RS16660		Methylerythritol Phosphate Pathway	0	0	1000	1.17.7.1	NADH + H+ + 2-C-methyl-D-erythritol2-4-cyclodiphosphate -> H2O + NAD + 1-Hydroxy-2-methyl-2-butenyl 4-diphosphate		0	0	0	0	0	0	0	0	0	0	0	0	0	0	0	0	0	0	0	0	0	0	0	0	0	0	0	0	0	0	0	0	0	0	0	0	0
rxn12639_c0	aminopeptidase c0	S_cpd00001[c] + S_cpd11587[c] <=> S_cpd00035[c] + S_cpd00053[c]	(((CAETHG_RS04585) or (CAETHG_RS15660)) or (CAETHG_RS03545) or (CAETHG_RS07155))	CAETHG_RS03545 CAETHG_RS04585 CAETHG_RS07155 CAETHG_RS15660		Recycling of Peptidoglycan Amino Acids|Protein degradation	1	-1000	1000		H2O + Ala-Gln <=> L-Alanine + L-Glutamine		0	0	0	0	0	0	0	0	0	0	0	0	0	0	0	0	0	0	0	0	0	0	0	0	0	0	0	0	0	0	0	0	0	0	0	0	0
rxn00926_c0	Adenine aminohydrolase c0	S_cpd00001[c] + S_cpd00067[c] + S_cpd00128[c] -> S_cpd00013[c] + S_cpd00226[c]	((CAETHG_RS04715) or (CAETHG_RS03240) or (CAETHG_RS02190))	CAETHG_RS02190 CAETHG_RS03240 CAETHG_RS04715		Purine conversions	0	0	1000	3.5.4.2	H2O + H+ + Adenine -> NH3 + HYXN		0	0	0	0	0	0	0	0	0	0	0	0	0	0	0	0	0	0	0	0	0	0	0	0	0	0	0	0	0	0	0	0	0	0	0	0	0
rxn03080_c0	6,7-Dimethyl-8-(1-D-ribityl)lumazine:6,7-dimethyl-8-(1-D-ribityl) c0	S_cpd02882[c] + S_cpd11225[c] <=> 2 S_cpd00001[c] + S_cpd00009[c] + S_cpd00067[c] + S_cpd02656[c]	(CAETHG_RS01430)	CAETHG_RS01430		Riboflavin, FMN and FAD metabolism	1	-1000	1000	2.5.1.9	4-1-D-Ribitylamino-5-aminouracil + 3-4-dihydroxy-2-butanone4-phosphate <=> 2 H2O + Phosphate + H+ + 6-7-Dimethyl-8-1-D-ribityllumazine		2.11068e-05	2.11068e-05	2.11068e-05	2.16216e-05	2.12355e-05	2.22915e-07	2.16216e-05	2.16216e-05	2.11068e-05	2.16216e-05	2.14929e-05	2.22915e-07	2.11068e-05	2.16216e-05	2.13642e-05	2.574e-07	2.16216e-05	2.11068e-05	2.13642e-05	2.574e-07	2.11068e-05	2.11068e-05	2.11068e-05	2.11068e-05	0	2.16216e-05	2.16216e-05	2.16216e-05	2.21364e-05	2.17503e-05	2.22915e-07	2.16216e-05	2.16216e-05	2.16216e-05	0	1.0296e-05	1.00901e-05
rxn05150_c0	Zinc-ABC transport c0	S_cpd00001[c] + S_cpd00002[c] + S_cpd00034[e] -> S_cpd00008[c] + S_cpd00009[c] + S_cpd00034[c] + S_cpd00067[c]	((CAETHG_RS05305) and ((CAETHG_RS01500) or (CAETHG_RS08105)) and (CAETHG_RS05310))	CAETHG_RS01500 CAETHG_RS05305 CAETHG_RS05310 CAETHG_RS08105		Transport of Zinc	0	0	1000		H2O + ATP + Zn2+ -> ADP + Phosphate + Zn2+ + H+		1.35977e-05	1.35977e-05	1.35977e-05	1.39293e-05	1.36806e-05	1.43609e-07	1.39293e-05	1.39293e-05	1.35977e-05	1.39293e-05	1.38464e-05	1.43609e-07	1.35977e-05	1.39293e-05	1.37635e-05	1.65825e-07	1.39293e-05	1.35977e-05	1.37635e-05	1.65825e-07	1.35977e-05	1.35977e-05	1.35977e-05	1.35976e-05	1.69407e-21	1.39293e-05	1.39293e-05	1.39293e-05	1.42609e-05	1.40122e-05	1.43609e-07	1.39293e-05	1.39293e-05	1.39293e-05	0	6.633e-06	6.50034e-06
cpd00034_ext_b		S_cpd00034[e] <=>				Exchange Reactions	1	-1000	0		Zn2+ <=>		-1.35976e-05	-1.35976e-05	-1.35976e-05	-1.39293e-05	-1.36806e-05	1.43609e-07	-1.39293e-05	-1.39293e-05	-1.35976e-05	-1.39293e-05	-1.38464e-05	1.43609e-07	-1.35976e-05	-1.39293e-05	-1.37635e-05	1.65825e-07	-1.39293e-05	-1.35976e-05	-1.37635e-05	1.65825e-07	-1.35976e-05	-1.35976e-05	-1.35976e-05	-1.35976e-05	0	-1.39293e-05	-1.39293e-05	-1.39293e-05	-1.4261e-05	-1.40122e-05	1.43609e-07	-1.39293e-05	-1.39293e-05	-1.39293e-05	0	-6.633e-06	-6.50034e-06
rxn01761_c0	L-Rhamnose ketol-isomerase c0	S_cpd00396[c] <=> S_cpd00642[c]	(CAETHG_RS10200)	CAETHG_RS10200		Rhamnose utilisation	1	-1000	1000	5.3.1.14	L-Rhamnose <=> L-Rhamnulose		0	0	0	0	0	0	0	0	0	0	0	0	0	0	0	0	0	0	0	0	0	0	0	0	0	0	0	0	0	0	0	0	0	0	0	0	0
rxn05199_c0	Uridine ion-coupled transport c0	S_cpd00067[e] + S_cpd00249[e] <=> S_cpd00067[c] + S_cpd00249[c]	(CAETHG_RS19245)	CAETHG_RS19245		Deoxyribose and Deoxynucleoside Catabolism	1	-1000	1000		H+ + Uridine <=> H+ + Uridine		0	0	0	0	0	0	0	0	0	0	0	0	0	0	0	0	0	0	0	0	0	0	0	0	0	0	0	0	0	0	0	0	0	0	0	0	0
rxn01639_c0	N-Formimino-L-glutamate formiminohydrolase c0	S_cpd00001[c] + S_cpd00344[c] -> S_cpd00023[c] + S_cpd00378[c]	(CAETHG_RS01085)	CAETHG_RS01085		Histidine degradation	0	0	1000	3.5.3.8	H2O + N-Formimino-L-glutamate -> L-Glutamate + Formamide		0	0	0	0	0	0	0	0	0	0	0	0	0	0	0	0	0	0	0	0	0	0	0	0	0	0	0	0	0	0	0	0	0	0	0	0	0
rxn05040_c0	3,4-Dihydroxy-2-butanone 4-phosphate synthase c0	S_cpd00171[c] -> S_cpd00047[c] + S_cpd00067[c] + S_cpd11225[c]	((CAETHG_RS01435) and (CAETHG_RS01435))	CAETHG_RS01435		Riboflavin, FMN and FAD metabolism|YgfZ	0	0	1000		D-Ribulose5-phosphate -> Formate + H+ + 3-4-dihydroxy-2-butanone4-phosphate		2.11068e-05	2.11068e-05	2.11068e-05	2.16216e-05	2.12355e-05	2.22915e-07	2.16216e-05	2.16216e-05	2.11068e-05	2.16216e-05	2.14929e-05	2.22915e-07	2.11068e-05	2.16216e-05	2.13642e-05	2.574e-07	2.16216e-05	2.11068e-05	2.13642e-05	2.574e-07	2.11068e-05	2.11068e-05	2.11068e-05	2.11068e-05	0	2.16216e-05	2.16216e-05	2.16216e-05	2.21364e-05	2.17503e-05	2.22915e-07	2.16216e-05	2.16216e-05	2.16216e-05	0	1.0296e-05	1.00901e-05
rxn01204_c0	4-Aminobutanoate:2-oxoglutarate aminotransferase c0	S_cpd00024[c] + S_cpd00281[c] <=> S_cpd00023[c] + S_cpd00199[c]	(CAETHG_RS00615)	CAETHG_RS00615		GABA Shunt	1	-1000	1000	2.6.1.19	2-Oxoglutarate + GABA <=> L-Glutamate + 4-Oxobutanoate		0	0	0	0	0	0	0	0	0	0	0	0	0	0	0	0	0	0	0	0	0	0	0	0	0	0	0	0	0	0	0	0	0	0	0	0	0
rxn00350_c0	glutathione hydralase (periplasmic) c0	S_cpd00001[c] + S_cpd00042[c] <=> S_cpd00023[c] + S_cpd01017[c]	(CAETHG_RS19790)	CAETHG_RS19790		utilisation of glutathione as a sulphur source|Glutathione: Biosynthesis and gamma-glutamyl cycle|Glutathione: gamma-glutamyl cycle|Poly-gamma-glutamate biosynthesis	1	-1000	1000	2.3.2.2,3.4.11.4	H2O + GSH <=> L-Glutamate + Cys-Gly		0	0	0	0	0	0	0	0	0	0	0	0	0	0	0	0	0	0	0	0	0	0	0	0	0	0	0	0	0	0	0	0	0	0	0	0	0
rxn10300_c0	stearoyl-lipoteichoic acid synthesis (n-24), linked, glucose substituted c0	24 S_cpd00026[c] + S_cpd15748[c] <=> 24 S_cpd00014[c] + S_cpd15757[c]	(CAETHG_RS06265)	CAETHG_RS06265		Teichoic and lipoteichoic acids biosynthesis	1	-1000	1000	2.4.1.52	24 UDP-glucose + Stearoyllipoteichoic acid (n-24), linked, unsubstituted <=> 24 UDP + Stearoyllipoteichoic acid (n-24), linked, glucose substituted		0	0	0	0	0	0	0	0	0	0	0	0	0	0	0	0	0	0	0	0	0	0	0	0	0	0	0	0	0	0	0	0	0	0	0	0	0
rxn09562_c0	guanylate kinase (GMP:dATP) c0	S_cpd00115[c] + S_cpd00126[c] <=> S_cpd00031[c] + S_cpd00177[c]	(CAETHG_RS16375)	CAETHG_RS16375		MLST|Purine conversions	1	-1000	1000	2.7.4.8	dATP + GMP <=> GDP + dADP		0	0	0	0	0	0	0	0	0	0	0	0	0	0	0	0	0	0	0	0	0	0	0	0	0	0	0	0	0	0	0	0	0	0	0	0	0
rxn05612_c0	melibiose transport in via symport c0	S_cpd00067[e] + S_cpd03198[e] <=> S_cpd00067[c] + S_cpd03198[c]	(CAETHG_RS00660)	CAETHG_RS00660		Melibiose utilisation	1	-1000	1000		H+ + Melibiose <=> H+ + Melibiose		0	0	0	0	0	0	0	0	0	0	0	0	0	0	0	0	0	0	0	0	0	0	0	0	0	0	0	0	0	0	0	0	0	0	0	0	0
rxn00799_c0	(S)-Malate hydro-lyase c0	S_cpd00130[c] <=> S_cpd00001[c] + S_cpd00106[c]	((CAETHG_RS09220) or (CAETHG_RS09215))	CAETHG_RS09215 CAETHG_RS09220		Citric Acid Cycle	1	-1000	1000	4.2.1.2	L-Malate <=> H2O + Fumarate		-0.0149334	-0.0149334	-0.0149334	-0.0152976	-0.0150245	0.000157716	-0.0152976	-0.0152976	-0.0149334	-0.0152976	-0.0152066	0.000157716	-0.0149334	-0.0152976	-0.0151155	0.000182115	-0.0152976	-0.0149334	-0.0151155	0.000182115	-0.0149334	-0.0149334	-0.0149334	-0.0149334	1.60777e-13	-0.0152976	-0.0152976	-0.0152976	-0.0156619	-0.0153887	0.000157716	-0.0152976	-0.0152976	-0.0152976	0	-0.00728458	-0.00713889
rxn00313_c0	meso-2,6-Diaminoheptanedioate carboxy-lyase c0	S_cpd00067[c] + S_cpd00516[c] -> S_cpd00011[c] + S_cpd00039[c]	(CAETHG_RS08180)	CAETHG_RS08180		Lysine biosynthesis	0	0	1000	4.1.1.20	H+ + meso-2,6-Diaminopimelate -> CO2 + L-Lysine		0.0136078	0.0136078	0.0136078	0.0139397	0.0136908	0.000143716	0.0139397	0.0139397	0.0136078	0.0139397	0.0138568	0.000143716	0.0136078	0.0139397	0.0137738	0.000165949	0.0139397	0.0136078	0.0137738	0.000165949	0.0136078	0.0136078	0.0136078	0.0136078	0	0.0139397	0.0139397	0.0139397	0.0142716	0.0140227	0.000143716	0.0139397	0.0139397	0.0139397	0	0.00663797	0.00650521
rxn09197_c0	Phosphatidylserine decarboxylase (n-C12:0) c0	2 S_cpd00067[c] + S_cpd15552[c] <=> S_cpd00011[c] + S_cpd15528[c]	(CAETHG_RS10720)	CAETHG_RS10720		Glycerolipid and Glycerophospholipid Metabolism in Bacteria|Bacterial cyanide production and tolerance mechanisms	1	-1000	1000	4.1.1.65	2 H+ + phosphatidylserine didodecanoyl <=> CO2 + phosphatidylethanolamine didodecanoyl		0	0	0	0	0	0	0	0	0	0	0	0	0	0	0	0	0	0	0	0	0	0	0	0	0	0	0	0	0	0	0	0	0	0	0	0	0
rxn02791_c0	(5-Glutamyl)-peptide:amino-acid 5-glutamyltransferase c0	S_cpd00023[c] + S_cpd01651[c] <=> S_cpd00001[c] + S_cpd03407[c]	(CAETHG_RS19790)	CAETHG_RS19790		utilisation of glutathione as a sulphur source|Glutathione: Biosynthesis and gamma-glutamyl cycle|Glutathione: gamma-glutamyl cycle|Poly-gamma-glutamate biosynthesis	1	-1000	1000	2.3.2.2	L-Glutamate + L-3-Cyanoalanine <=> H2O + gamma-Glutamyl-beta-cyanoalanine		0	0	0	0	0	0	0	0	0	0	0	0	0	0	0	0	0	0	0	0	0	0	0	0	0	0	0	0	0	0	0	0	0	0	0	0	0
rxn01972_c0	N6-Acetyl-LL-2,6-diaminoheptanedioate amidohydrolase c0	S_cpd00001[c] + S_cpd02685[c] <=> S_cpd00029[c] + S_cpd00504[c]	((CAETHG_RS18870) or (CAETHG_RS13365))	CAETHG_RS13365 CAETHG_RS18870		Lysine biosynthesis	1	-1000	1000	3.5.1.47	H2O + N-acetyl-LL-2,6-diaminopimelate <=> Acetate + LL-2,6-Diaminopimelate		0.018187	0.018187	0.018187	0.0186306	0.0182979	0.000192078	0.0186306	0.0186306	0.018187	0.0186306	0.0185197	0.000192078	0.018187	0.0186306	0.0184088	0.000221792	0.0186306	0.018187	0.0184088	0.000221792	0.018187	0.018187	0.018187	0.018187	0	0.0186306	0.0186306	0.0186306	0.0190741	0.0187415	0.000192078	0.0186306	0.0186306	0.0186306	0	0.00887169	0.00869426
rxn11268_c0	phosphate ABC transporter permease protein c0	S_cpd00012[c] + S_cpd00067[c] -> S_cpd00012[e] + S_cpd00067[e]	(CAETHG_RS16340)	CAETHG_RS16340		Phosphate metabolism	0	0	1000		PPi + H+ -> PPi + H+		0	0	0	0	0	0	0	0	0	0	0	0	0	0	0	0	0	0	0	0	0	0	0	0	0	0	0	0	0	0	0	0	0	0	0	0	0
rxn05344_c0	Tetradecanoyl-[acyl-carrier protein]:malonyl-[acyl-carrier-protein] c0	S_cpd00067[c] + S_cpd11466[c] + S_cpd11492[c] -> S_cpd00011[c] + S_cpd11485[c] + S_cpd11493[c]	((CAETHG_RS10005) and (CAETHG_RS09985))	CAETHG_RS09985 CAETHG_RS10005		Fatty Acid Biosynthesis FASII	0	0	1000	2.3.1.41,2.3.1.85,2.3.1.86,2.3.1.179,2.3.1.180	H+ + Myristoyl-ACP + Malonyl-acyl-carrierprotein -> CO2 + 3-oxohexadecanoyl-acp + ACP		0	0	0	0	0	0	0	0	0	0	0	0	0	0	0	0	0	0	0	0	0	0	0	0	0	0	0	0	0	0	0	0	0	0	0	0	0
rxn00676_c0	Propanoyl-CoA:acetyl-CoA C-acyltransferase c0	S_cpd00022[c] + S_cpd00086[c] <=> S_cpd00010[c] + S_cpd02124[c]	(CAETHG_RS02035)	CAETHG_RS02035		Isobutyryl-CoA to Propionyl-CoA Module|Isoleucine degradation|Branched chain amino acid degradation regulons	1	-1000	1000	2.3.1.16	Acetyl-CoA + Propionyl-CoA <=> CoA + 2-Methylacetoacetyl-CoA		0	0	0	0	0	0	0	0	0	0	0	0	0	0	0	0	0	0	0	0	0	0	0	0	0	0	0	0	0	0	0	0	0	0	0	0	0
rxn01281_c0	(R)-Glycerate:NADP+ oxidoreductase c0	S_cpd00006[c] + S_cpd00223[c] <=> S_cpd00005[c] + S_cpd00067[c] + S_cpd00843[c]	(CAETHG_RS10710)	CAETHG_RS10710		NADP Metabolism	1	-1000	0	1.1.1.60	NADP + Glycerate <=> NADPH + H+ + Tartronate semialdehyde		0	0	0	0	0	0	0	0	0	0	0	0	0	0	0	0	0	0	0	0	0	0	0	0	0	0	0	0	0	0	0	0	0	0	0	0	0
rxn10339_c0	isotetradecanoyl-cardiolipin synthase c0	2 S_cpd15724[c] <=> S_cpd00100[c] + S_cpd15796[c]	((CAETHG_RS14670) or (CAETHG_RS04280))	CAETHG_RS04280 CAETHG_RS14670		Glycerolipid and Glycerophospholipid Metabolism in Bacteria	1	-1000	1000		2 Diisotetradecanoylphosphatidylglycerol <=> Glycerol + Isotetradecanoylcardiolipin (B. subtilis)		0	0	0	0	0	0	0	0	0	0	0	0	0	0	0	0	0	0	0	0	0	0	0	0	0	0	0	0	0	0	0	0	0	0	0	0	0
rxn10226_c0	isoheptadecanoyl-CDPdiacylglycerol-serine O-phosphatidyltransferase c0	S_cpd00054[c] + S_cpd15683[c] -> S_cpd00046[c] + S_cpd00067[c] + S_cpd15689[c]	(CAETHG_RS11850)	CAETHG_RS11850		Glycerolipid and Glycerophospholipid Metabolism in Bacteria	0	0	1000	2.7.8.8	L-Serine + CDP-1,2-diisoheptadecanoylglycerol -> CMP + H+ + Diisoheptadecanoylphosphatidylserine		0	0	0	0	0	0	0	0	0	0	0	0	0	0	0	0	0	0	0	0	0	0	0	0	0	0	0	0	0	0	0	0	0	0	0	0	0
rxn10237_c0	isohexadecanoyl-phosphatidylserine decarboxylase c0	2 S_cpd00067[c] + S_cpd15694[c] <=> S_cpd00011[c] + S_cpd15700[c]	(CAETHG_RS10720)	CAETHG_RS10720		Glycerolipid and Glycerophospholipid Metabolism in Bacteria|Bacterial cyanide production and tolerance mechanisms	1	-1000	1000	4.1.1.65	2 H+ + Diisohexadecanoylphosphatidylserine <=> CO2 + Diisohexadecanoylphosphatidylethanolamine		0	0	0	0	0	0	0	0	0	0	0	0	0	0	0	0	0	0	0	0	0	0	0	0	0	0	0	0	0	0	0	0	0	0	0	0	0
rxn05248_c0	FACOAL150(anteiso) c0	S_cpd00002[c] + S_cpd00010[c] + S_cpd00067[c] + S_cpd11438[c] -> S_cpd00012[c] + S_cpd00018[c] + S_cpd11439[c]	(CAETHG_RS08635)	CAETHG_RS08635		Fatty acid degradation regulons|Unsaturated Fatty Acid Metabolism|Carbonate Biomineralization|n-Phenylalkanoic acid degradation|Biotin biosynthesis	0	0	1000	6.2.1.3	ATP + CoA + H+ + fa4 -> PPi + AMP + fa4coa		0	0	0	0	0	0	0	0	0	0	0	0	0	0	0	0	0	0	0	0	0	0	0	0	0	0	0	0	0	0	0	0	0	0	0	0	0
rxn10223_c0	isopentadecanoyl-phosphatidate cytidylyltransferase c0	S_cpd00052[c] + S_cpd15680[c] <=> S_cpd00012[c] + S_cpd15686[c]	(CAETHG_RS16645)	CAETHG_RS16645		Glycerolipid and Glycerophospholipid Metabolism in Bacteria	1	-1000	1000	2.7.7.41	CTP + 1,2-diisopentadecanoyl-sn-glycerol 3-phosphate <=> PPi + CDP-1,2-diisopentadecanoylglycerol		0	0	0	0	0	0	0	0	0	0	0	0	0	0	0	0	0	0	0	0	0	0	0	0	0	0	0	0	0	0	0	0	0	0	0	0	0
rxn10210_c0	isohexadecanoyl-glycerol-3-phosphate O-acyltransferase c0	S_cpd00080[c] + S_cpd11441[c] -> S_cpd00010[c] + S_cpd15676[c]	(() and (CAETHG_RS16510))	CAETHG_RS16510		Glycerolipid and Glycerophospholipid Metabolism in Bacteria	0	0	1000	2.3.1.15	Glycerol-3-phosphate + fa6coa -> CoA + 1-isohexadecanoyl-sn-glycerol 3-phosphate		0	0	0	0	0	0	0	0	0	0	0	0	0	0	0	0	0	0	0	0	0	0	0	0	0	0	0	0	0	0	0	0	0	0	0	0	0
rxn02503_c0	ATP:2-amino-4-hydroxy-6-hydroxymethyl-7,8-dihydropteridine c0	S_cpd00002[c] + S_cpd00954[c] -> S_cpd00018[c] + S_cpd02920[c]	(CAETHG_RS13415)	CAETHG_RS13415		Folate Biosynthesis|Folate Biosynthesis (Phoenix Copy)|YgfZ|Methanopterin biosynthesis2|Pterin metabolism 3	0	0	1000	2.7.6.3	ATP + 6-hydroxymethyl dihydropterin -> AMP + 2-Amino-4-hydroxy-6-hydroxymethyl-7-8-dihydropteridinediphosphate		0	0	0	0	0	0	0	0	0	0	0	0	0	0	0	0	0	0	0	0	0	0	0	0	0	0	0	0	0	0	0	0	0	0	0	0	0
rxn05349_c0	acetyl-CoA:[acyl-carrier-protein] S-acetyltransferase c0	S_cpd00022[c] + S_cpd11493[c] <=> S_cpd00010[c] + S_cpd11494[c]	((CAETHG_RS10005) and (CAETHG_RS09985))	CAETHG_RS09985 CAETHG_RS10005		Fatty Acid Biosynthesis FASII	1	-1000	1000	2.3.1.179,2.3.1.180,2.3.1.38,2.3.1.41,2.3.1.85,2.3.1.86	Acetyl-CoA + ACP <=> CoA + Acetyl-ACP		0.0087061	0.0087061	0.0087061	0.00891845	0.00875919	9.19476e-05	0.00891845	0.00891845	0.0087061	0.00891845	0.00886536	9.19476e-05	0.0087061	0.00891845	0.00881228	0.000106172	0.00891845	0.0087061	0.00881228	0.000106172	0.0087061	0.0087061	0.0087061	0.0087061	0	0.00891845	0.00891845	0.00891845	0.00913079	0.00897153	9.19476e-05	0.00891845	0.00891845	0.00891845	0	0.00424688	0.00416194
rxn10275_c0	anteisoheptadecanoyl-UDP-glucosyltransferase (diglucosyl) c0	S_cpd00026[c] + S_cpd15741[c] <=> S_cpd00014[c] + S_cpd15732[c]	(CAETHG_RS11420)	CAETHG_RS11420		Teichoic and lipoteichoic acids biosynthesis	1	-1000	1000		UDP-glucose + Monoglucosyl-1,2 dianteisoheptadecanoylglycerol <=> UDP + Diglucosyl-1,2 dianteisoheptadecanoylglycerol		0	0	0	0	0	0	0	0	0	0	0	0	0	0	0	0	0	0	0	0	0	0	0	0	0	0	0	0	0	0	0	0	0	0	0	0	0
rxn08655_c0	Glycolate oxidase c0	S_cpd00139[c] + S_cpd15560[c] <=> S_cpd00040[c] + S_cpd15561[c]	(() and ((CAETHG_RS01815) or (CAETHG_RS13190) or (CAETHG_RS01160) or (CAETHG_RS00560) or (CAETHG_RS17055)) and ())	CAETHG_RS00560 CAETHG_RS01160 CAETHG_RS01815 CAETHG_RS13190 CAETHG_RS17055		Photorespiration (oxidative C2 cycle)|Glycolate, glyoxylate interconversions	1	-1000	1000		Glycolate + Ubiquinone-8 <=> Glyoxalate + Ubiquinol-8		0	0	0	0	0	0	0	0	0	0	0	0	0	0	0	0	0	0	0	0	0	0	0	0	0	0	0	0	0	0	0	0	0	0	0	0	0
rxn01989_c0	D-Glucarate hydro-lyase c0	S_cpd00609[c] -> S_cpd00001[c] + S_cpd00515[c]	(CAETHG_RS03865)	CAETHG_RS03865		D-galactarate, D-glucarate and D-glycerate catabolism	0	0	1000	4.2.1.40	D-Glucarate -> H2O + 5-Dehydro-4-deoxy-D-glucarate		0	0	0	0	0	0	0	0	0	0	0	0	0	0	0	0	0	0	0	0	0	0	0	0	0	0	0	0	0	0	0	0	0	0	0	0	0
rxn04794_c0	Acetyl-CoA:formate C-acetyltransferase c0	S_cpd00010[c] + S_cpd00094[c] <=> S_cpd00047[c] + S_cpd00086[c]	((CAETHG_RS16075) or (CAETHG_RS03170) or (CAETHG_RS08860))	CAETHG_RS03170 CAETHG_RS08860 CAETHG_RS16075		Threonine degradation	1	-1000	1000	2.3.1.-	CoA + 2-Oxobutyrate <=> Formate + Propionyl-CoA		0	0	0	0	0	0	0	0	0	0	0	0	0	0	0	0	0	0	0	0	0	0	0	0	0	0	0	0	0	0	0	0	0	0	0	0	0
rxn10307_c0	palmitoyl-lipoteichoic acid synthesis (n-24), linked, N-acetylglucosamine substituted c0	24 S_cpd00037[c] + S_cpd15746[c] <=> 24 S_cpd00014[c] + S_cpd15764[c]	(CAETHG_RS11510)	CAETHG_RS11510		Teichoic and lipoteichoic acids biosynthesis|Methicillin resistance in Staphylococci|Teichuronic acid biosynthesis	1	-1000	1000	2.7.8.-	24 UDP-N-acetylglucosamine + Palmitoyllipoteichoic acid (n-24), linked, unsubstituted <=> 24 UDP + Palmitoyllipoteichoic acid (n-24), linked, N-acetyl-D-glucosamine		0	0	0	0	0	0	0	0	0	0	0	0	0	0	0	0	0	0	0	0	0	0	0	0	0	0	0	0	0	0	0	0	0	0	0	0	0
rxn01334_c0	Sedoheptulose 1,7-bisphosphate D-glyceraldehyde-3-phosphate-lyase c0	S_cpd00349[c] <=> S_cpd00095[c] + S_cpd00236[c]	((CAETHG_RS11740) or (CAETHG_RS10700))	CAETHG_RS10700 CAETHG_RS11740		Hexitol degradation|Calvin-Benson cycle|Formaldehyde assimilation: Ribulose monophosphate pathway|Glycolysis and Gluconeogenesis	1	-1000	1000	4.1.2.13	Sedoheptulose 1,7-bisphosphate <=> Glycerone-phosphate + D-Erythrose4-phosphate		0	0	0	0	0	0	0	0	0	0	0	0	0	0	0	0	0	0	0	0	0	0	0	0	0	0	0	0	0	0	0	0	0	0	0	0	0
rxn01028_c0	5,6-Dihydrothymine:NADP+ oxidoreductase c0	S_cpd00006[c] + S_cpd00673[c] <=> S_cpd00005[c] + S_cpd00067[c] + S_cpd00151[c]	(CAETHG_RS07185)	CAETHG_RS07185		Pyrimidine utilisation	1	-1000	1000	1.3.1.2	NADP + Dihydrothymine <=> NADPH + H+ + Thymine		0	0	0	0	0	0	0	0	0	0	0	0	0	0	0	0	0	0	0	0	0	0	0	0	0	0	0	0	0	0	0	0	0	0	0	0	0
rxn08087_c0	1-hexadec-7-enoyl-sn-glycerol 3-phosphate O-acyltransferase (n-C16:1) c0	S_cpd15239[c] + S_cpd15326[c] -> S_cpd11493[c] + S_cpd15525[c]	((CAETHG_RS13530) or (CAETHG_RS08580))	CAETHG_RS08580 CAETHG_RS13530		Phosphate metabolism|Glycerolipid and Glycerophospholipid Metabolism in Bacteria	0	0	1000	2.3.1.51	Hexadecenoyl-ACP + 1-hexadec-9-enoyl-sn-glycerol 3-phosphate -> ACP + 1,2-dihexadec-9-enoyl-sn-glycerol 3-phosphate		0	0	0	0	0	0	0	0	0	0	0	0	0	0	0	0	0	0	0	0	0	0	0	0	0	0	0	0	0	0	0	0	0	0	0	0	0
rxn03188_c0	3-Ureidoisobutyrate amidohydrolase c0	S_cpd00001[c] + 2 S_cpd00067[c] + S_cpd03034[c] -> S_cpd00011[c] + S_cpd00013[c] + S_cpd03063[c]	(CAETHG_RS07205)	CAETHG_RS07205		Hydantoin metabolism|Pyrimidine utilisation|L-2-amino-thiazoline-4-carboxylic acid-Lcysteine conversion	0	0	1000	3.5.1.6	H2O + 2 H+ + 3-Ureidoisobutyrate -> CO2 + NH3 + 3-Aminoisobutanoate		0	0	0	0	0	0	0	0	0	0	0	0	0	0	0	0	0	0	0	0	0	0	0	0	0	0	0	0	0	0	0	0	0	0	0	0	0
rxn05200_c0	Thymidine ion-coupled transport c0	S_cpd00067[e] + S_cpd00184[e] <=> S_cpd00067[c] + S_cpd00184[c]	(CAETHG_RS19245)	CAETHG_RS19245		Deoxyribose and Deoxynucleoside Catabolism	1	-1000	1000		H+ + Thymidine <=> H+ + Thymidine		0	0	0	0	0	0	0	0	0	0	0	0	0	0	0	0	0	0	0	0	0	0	0	0	0	0	0	0	0	0	0	0	0	0	0	0	0
rxn00770_c0	ATP:D-ribose-5-phosphate pyrophosphotransferase c0	S_cpd00002[c] + S_cpd00101[c] -> S_cpd00018[c] + S_cpd00103[c]	(CAETHG_RS09805)	CAETHG_RS09805		Pentose Phosphate Pathway	0	0	1000	2.7.6.1	ATP + ribose-5-phosphate -> AMP + PRPP		0.0243373	0.0243373	0.0243373	0.0249309	0.0244857	0.000257034	0.0249309	0.0249309	0.0243373	0.0249309	0.0247825	0.000257034	0.0243373	0.0249309	0.0246341	0.000296797	0.0249309	0.0243373	0.0246341	0.000296797	0.0243373	0.0243373	0.0243373	0.0243373	9.43159e-14	0.0249309	0.0249309	0.0249309	0.0255245	0.0250793	0.000257034	0.0249309	0.0249309	0.0249309	2.84217e-14	0.0118719	0.0116344
rxn00192_c0	Acetyl-CoA:L-glutamate N-acetyltransferase c0	S_cpd00022[c] + S_cpd00023[c] -> S_cpd00010[c] + S_cpd00067[c] + S_cpd00477[c]	(CAETHG_RS01140)	CAETHG_RS01140		Arginine biosynthesis	0	0	1000	2.3.1.1	Acetyl-CoA + L-Glutamate -> CoA + H+ + N-Acetyl-L-glutamate		0	0	0	0	0	0	0	0	0	0	0	0	0	0	0	0	0	0	0	0	0	0	0	0	0	0	0	0	0	0	0	0	0	0	0	0	0
rxn05938_c0	rxn05938 c0	S_cpd00010[c] + S_cpd00020[c] + S_cpd11621[c] <=> S_cpd00011[c] + S_cpd00022[c] + S_cpd00067[c] + S_cpd11620[c]	((CAETHG_RS04430) or (CAETHG_RS14890))	CAETHG_RS04430 CAETHG_RS14890		Pyruvate Metabolism	1	-1000	1000	PFOR	CoA + Pyruvate + Oxidizedferredoxin <=> CO2 + Acetyl-CoA + H+ + Reducedferredoxin		-0.301399	-0.310639	-0.330679	-0.302342	-0.311264	0.0117712	-0.600582	-0.562182	-0.665119	-0.585342	-0.603306	0.0382168	-0.285384	-0.301534	-0.293459	0.008075	-0.590967	-0.592517	-0.591742	0.000774997	-0.318719	-0.24945	-0.318915	-0.295695	0.0326998	-0.459542	-0.425794	-0.467344	-0.440423	-0.448275	0.0162606	-0.224262	-0.32471	-0.274486	0.0502242	0.0167324	0.0933978
rxn00611_c0	sn-Glycerol-3-phosphate:NAD+ 2-oxidoreductase c0	S_cpd00003[c] + S_cpd00080[c] <=> S_cpd00004[c] + S_cpd00067[c] + S_cpd00095[c]	(CAETHG_RS16355)	CAETHG_RS16355		Glycerolipid and Glycerophospholipid Metabolism in Bacteria|Glutaredoxins|Glycerol and Glycerol-3-phosphate Uptake and utilisation	1	-1000	1000	1.1.1.8,1.1.1.94,1.1.1.261	NAD + Glycerol-3-phosphate <=> NADH + H+ + Glycerone-phosphate		-0.0336058	-0.0336058	-0.0336058	-0.0344255	-0.0338107	0.00035492	-0.0344255	-0.0344255	-0.0336058	-0.0344255	-0.0342205	0.00035492	-0.0336058	-0.0344255	-0.0340156	0.000409827	-0.0344255	-0.0336058	-0.0340156	0.000409827	-0.0336058	-0.0336058	-0.0336058	-0.0336058	0	-0.0344255	-0.0344255	-0.0344255	-0.0352451	-0.0346304	0.00035492	-0.0344255	-0.0344255	-0.0344255	0	-0.0163931	-0.0160652
rxn00289_c0	(2S,3R)-3-Hydroxybutane-1,2,3-tricarboxylate pyruvate-lyase c0	S_cpd02799[c] <=> S_cpd00020[c] + S_cpd00036[c]	(CAETHG_RS12370)	CAETHG_RS12370		Methylcitrate cycle|Propionate-CoA to Succinate Module	1	-1000	1000	4.1.3.30	Methylisocitrate <=> Pyruvate + Succinate		0	0	0	0	0	0	0	0	0	0	0	0	0	0	0	0	0	0	0	0	0	0	0	0	0	0	0	0	0	0	0	0	0	0	0	0	0
rxn05388_c0	5-methyl-hexanoyl-ACP:malonyl-[acyl-carrier-protein] C-acyltransferase (decarboxylating) c0	S_cpd00067[c] + S_cpd11492[c] + S_cpd11524[c] -> S_cpd00011[c] + S_cpd11493[c] + S_cpd11525[c]	((CAETHG_RS10005) and (CAETHG_RS09985))	CAETHG_RS09985 CAETHG_RS10005		Fatty Acid Biosynthesis FASII	0	0	1000	2.3.1.0	H+ + Malonyl-acyl-carrierprotein + 5-methyl-hexanoyl-ACP -> CO2 + ACP + 7-methyl-3-oxo-octanoyl-ACP		0	0	0	0	0	0	0	0	0	0	0	0	0	0	0	0	0	0	0	0	0	0	0	0	0	0	0	0	0	0	0	0	0	0	0	0	0
rxn02085_c0	4,5-Dihydro-4-oxo-5-imidazolepropanoate hydro-lyase c0	S_cpd02311[c] <=> S_cpd00001[c] + S_cpd00581[c]	(CAETHG_RS01115)	CAETHG_RS01115		Histidine degradation	1	-1000	1000	4.2.1.49	4-Imidazolone-5-propanoate <=> H2O + Urocanate		0	0	0	0	0	0	0	0	0	0	0	0	0	0	0	0	0	0	0	0	0	0	0	0	0	0	0	0	0	0	0	0	0	0	0	0	0
rxn05429_c0	12-methyl-tridecanoyl-ACP:malonyl-[acyl-carrier-protein] C-acyltransferase (decarboxylating) c0	S_cpd00067[c] + S_cpd11492[c] + S_cpd11565[c] -> S_cpd00011[c] + S_cpd11493[c] + S_cpd11566[c]	((CAETHG_RS10005) and (CAETHG_RS09985))	CAETHG_RS09985 CAETHG_RS10005		Fatty Acid Biosynthesis FASII	0	0	1000	2.3.1.0	H+ + Malonyl-acyl-carrierprotein + 12-methyl-tridecanoyl-ACP -> CO2 + ACP + 14-methyl-3-oxo-pentadecanoyl-ACP		0	0	0	0	0	0	0	0	0	0	0	0	0	0	0	0	0	0	0	0	0	0	0	0	0	0	0	0	0	0	0	0	0	0	0	0	0
rxn01739_c0	ATP:shikimate 3-phosphotransferase c0	S_cpd00002[c] + S_cpd00383[c] <=> S_cpd00008[c] + S_cpd02030[c]	(CAETHG_RS04315)	CAETHG_RS04315		Chorismate synthesis	1	-1000	1000	2.7.1.71	ATP + Shikimate <=> ADP + 3-phosphoshikimate		0.00573255	0.00573255	0.00573255	0.00587236	0.0057675	6.05431e-05	0.00587236	0.00587236	0.00573255	0.00587236	0.00583741	6.05431e-05	0.00573255	0.00587236	0.00580246	6.99091e-05	0.00587236	0.00573255	0.00580246	6.99091e-05	0.00573255	0.00573255	0.00573255	0.00573255	0	0.00587236	0.00587236	0.00587236	0.00601218	0.00590732	6.05431e-05	0.00587236	0.00587236	0.00587236	0	0.00279636	0.00274044
rxn00543_c0	Ethanol:NAD+ oxidoreductase c0	S_cpd00004[c] + S_cpd00067[c] + S_cpd00071[c] <=> S_cpd00003[c] + S_cpd00363[c]	((CAETHG_RS17700) or (CAETHG_RS12040) or (CAETHG_RS07215) or (CAETHG_RS05150) or (CAETHG_RS18400) or (CAETHG_RS18395))	CAETHG_RS05150 CAETHG_RS07215 CAETHG_RS12040 CAETHG_RS17700 CAETHG_RS18395 CAETHG_RS18400		Ethanol Fermentation Pathway	1	-1000	1000	1.1.1.1,1.1.1.71	NADH + H+ + Acetaldehyde <=> NAD + Ethanol		1.34	1.23	1.28	1.3	1.2875	0.0396074	2.58	2.57	2.67	2.49	2.5775	0.0637868	1.24	1.24	1.24	0	3.74	3.82	3.78	0.04	8.93	8.85	9.19	8.99	0.145144	7.78	7.56	8.63	7.63	7.9	0.428894	11.44	13.68	12.56	1.12	5.15	6.09
rxn00347_c0	L-Aspartate ammonia-lyase c0	S_cpd00041[c] -> S_cpd00013[c] + S_cpd00106[c]	((CAETHG_RS10085) or (CAETHG_RS12205))	CAETHG_RS10085 CAETHG_RS12205		Aspartate degradation	0	0	1000	4.3.1.1	L-Aspartate -> NH3 + Fumarate		0	0	0	0	0	0	0	0	0	0	0	0	0	0	0	0	0	0	0	0	0	0	0	0	0	0	0	0	0	0	0	0	0	0	0	0	0
rxn10052_c0	adenylate kinase (Inorganic triphosphate) c0	S_cpd00018[c] + S_cpd00067[c] + S_cpd00421[c] <=> S_cpd00008[c] + S_cpd00012[c]	(CAETHG_RS09335)	CAETHG_RS09335		Purine conversions	1	-1000	1000	2.7.4.3	AMP + H+ + Triphosphate <=> ADP + PPi		0	0	0	0	0	0	0	0	0	0	0	0	0	0	0	0	0	0	0	0	0	0	0	0	0	0	0	0	0	0	0	0	0	0	0	0	0
rxn05206_c0	Potassium uptake c0	S_cpd00205[e] <=> S_cpd00205[c]	(CAETHG_RS10300)	CAETHG_RS10300		Potassium homeostasis	1	-1000	1000	1.A.1	K+ <=> K+		0.00783793	0.00783793	0.00783793	0.0080291	0.00788572	8.27786e-05	0.0080291	0.0080291	0.00783793	0.0080291	0.00798131	8.27786e-05	0.00783793	0.0080291	0.00793351	9.55845e-05	0.0080291	0.00783793	0.00793351	9.55845e-05	0.00783793	0.00783793	0.00783793	0.00783793	0	0.0080291	0.0080291	0.0080291	0.00822027	0.00807689	8.27786e-05	0.0080291	0.0080291	0.0080291	0	0.00382338	0.00374691
rxn05552_c0	ethanesulfonate transport via ABC system c0	S_cpd00001[c] + S_cpd00002[c] + S_cpd11579[e] -> S_cpd00008[c] + S_cpd00009[c] + S_cpd00067[c] + S_cpd11579[c]	(() and ((CAETHG_RS03470) or (CAETHG_RS19320)) and ((CAETHG_RS03465) or (CAETHG_RS19325)))	CAETHG_RS03465 CAETHG_RS03470 CAETHG_RS19320 CAETHG_RS19325		Alkanesulfonate assimilation|Alkanesulfonates utilisation	0	0	1000		H2O + ATP + ethanesulfonate -> ADP + Phosphate + H+ + ethanesulfonate		0	0	0	0	0	0	0	0	0	0	0	0	0	0	0	0	0	0	0	0	0	0	0	0	0	0	0	0	0	0	0	0	0	0	0	0	0
rxn05235_c0	Ribonucleotide reductase: CTP c0	S_cpd00052[c] + S_cpd11421[c] -> S_cpd00001[c] + S_cpd00356[c] + S_cpd11420[c]	(CAETHG_RS11260)	CAETHG_RS11260		Ribonucleotide reduction	0	0	1000	1.17.4.2	CTP + trdrd -> H2O + dCTP + trdox		0.000573508	0.000573508	0.000573508	0.000587496	0.000577005	6.05698e-06	0.000587496	0.000587496	0.000573508	0.000587496	0.000583999	6.05698e-06	0.000573508	0.000587496	0.000580502	6.994e-06	0.000587496	0.000573508	0.000580502	6.994e-06	0.000573508	0.000573508	0.000573508	0.000573508	0	0.000587496	0.000587496	0.000587496	0.000601484	0.000590993	6.05698e-06	0.000587496	0.000587496	0.000587496	0	0.00027976	0.000274165
rxn01521_c0	5'-nucleotidase (dUMP) c0	S_cpd00001[c] + S_cpd00299[c] -> S_cpd00009[c] + S_cpd00067[c] + S_cpd00412[c]	(CAETHG_RS06610)	CAETHG_RS06610		Folate Biosynthesis|Folate Biosynthesis (Phoenix Copy)	0	0	1000	3.1.3.5,3.1.3.5)	H2O + dUMP -> Phosphate + H+ + Deoxyuridine		1.42065e-06	1.42065e-06	1.42065e-06	1.4553e-06	1.42931e-06	1.50039e-08	1.4553e-06	1.4553e-06	1.42065e-06	1.4553e-06	1.44664e-06	1.50039e-08	1.42065e-06	1.4553e-06	1.43798e-06	1.7325e-08	1.4553e-06	1.42065e-06	1.43797e-06	1.7325e-08	1.42065e-06	1.42065e-06	1.42065e-06	1.42065e-06	5.93682e-16	1.4553e-06	1.4553e-06	1.4553e-06	1.48995e-06	1.46396e-06	1.50039e-08	1.4553e-06	1.4553e-06	1.4553e-06	0	6.93e-07	6.7914e-07
rxn00097_c0	ATP:AMP phosphotransferase c0	S_cpd00002[c] + S_cpd00018[c] <=> 2 S_cpd00008[c]	(CAETHG_RS09335)	CAETHG_RS09335		Purine conversions	1	-1000	1000	2.7.4.3	ATP + AMP <=> 2 ADP		0.709597	0.662762	0.866477	0.649829	0.722166	0.086234	0.411369	0.498719	0.455092	0.482204	0.461846	0.0330439	0.0431729	0.0442259	0.0436994	0.000526498	0.0442259	0.0431729	0.0436994	0.000526498	0.0469674	0.0431729	0.0431729	0.0444377	0.00178877	0.0466036	0.0442259	0.0442259	0.0452788	0.0450835	0.000977226	0.0953986	0.0442259	0.0698122	0.0255864	0.0596231	0.0924327
rxn06591_c0	L-glutamate-semialdehyde: NADP+ c0	S_cpd00005[c] + S_cpd00067[c] + S_cpd12227[c] <=> S_cpd00006[c] + S_cpd02345[c] + S_cpd11912[c]	(CAETHG_RS12405)	CAETHG_RS12405		Experimental tye|Heme and Siroheme Biosynthesis	1	-1000	1000	1.2.1.70	NADPH + H+ + L-Glutamyl-tRNA-Glu <=> NADP + L-Glutamate1-semialdehyde + tRNA-Glu		0	0	0	0	0	0	0	0	0	0	0	0	0	0	0	0	0	0	0	0	0	0	0	0	0	0	0	0	0	0	0	0	0	0	0	0	0
rxn00126_c0	ATP:L-methione S-adenosyltransferase c0	S_cpd00001[c] + S_cpd00002[c] + S_cpd00060[c] -> S_cpd00009[c] + S_cpd00012[c] + S_cpd00017[c]	(CAETHG_RS11625)	CAETHG_RS11625		Methionine Biosynthesis	0	0	1000	2.5.1.6	H2O + ATP + L-Methionine -> Phosphate + PPi + S-Adenosyl-L-methionine		0.00393211	0.00393211	0.00393211	0.00402802	0.00395609	4.15282e-05	0.00402802	0.00402802	0.00393211	0.00402802	0.00400404	4.15282e-05	0.00393211	0.00402802	0.00398007	4.79526e-05	0.00402802	0.00393211	0.00398007	4.79526e-05	0.00393211	0.00393211	0.00393211	0.00393211	0	0.00402802	0.00402802	0.00402802	0.00412392	0.004052	4.15282e-05	0.00402802	0.00402802	0.00402802	0	0.0019181	0.00187974
rxn00414_c0	Carbon-dioxide:L-glutamine amido-ligase (ADP-forming, c0	S_cpd00001[c] + 2 S_cpd00002[c] + S_cpd00053[c] + S_cpd00242[c] -> 2 S_cpd00008[c] + S_cpd00009[c] + S_cpd00023[c] + S_cpd00067[c] + S_cpd00146[c]	((CAETHG_RS02805) and ((CAETHG_RS02800) or (CAETHG_RS12355)))	CAETHG_RS02800 CAETHG_RS02805 CAETHG_RS12355		Arginine biosynthesis	0	0	1000	6.3.5.5	H2O + 2 ATP + L-Glutamine + H2CO3 -> 2 ADP + Phosphate + L-Glutamate + H+ + Carbamoylphosphate		0.0117222	0.0117222	0.0117222	0.0120081	0.0117937	0.000123801	0.0120081	0.0120081	0.0117222	0.0120081	0.0119366	0.000123801	0.0117222	0.0120081	0.0118651	0.000142953	0.0120081	0.0117222	0.0118651	0.000142953	0.0117222	0.0117222	0.0117222	0.0117222	5.93682e-16	0.0120081	0.0120081	0.0120081	0.012294	0.0120796	0.000123801	0.0120081	0.0120081	0.0120081	0	0.00571814	0.00560378
rxn05547_c0	Dipeptide transport via ABC system (gly-gln) c0	S_cpd00001[c] + S_cpd00002[c] + S_cpd11580[e] -> S_cpd00008[c] + S_cpd00009[c] + S_cpd00067[c] + S_cpd11580[c]	(CAETHG_RS07520)	CAETHG_RS07520		ABC transporter dipeptide (TC 3.A.1.5.2)	0	0	1000		H2O + ATP + Gly-Gln -> ADP + Phosphate + H+ + Gly-Gln		0	0	0	0	0	0	0	0	0	0	0	0	0	0	0	0	0	0	0	0	0	0	0	0	0	0	0	0	0	0	0	0	0	0	0	0	0
rxn06937_c0	L-Glutamate:tRNA(Glu) ligase (AMP-forming) c0	S_cpd00002[c] + S_cpd00023[c] + S_cpd00067[c] + S_cpd11912[c] -> S_cpd00012[c] + S_cpd00018[c] + S_cpd12227[c]	(CAETHG_RS16810)	CAETHG_RS16810		Glu-tRNA(Gln) transamidation|tRNA aminoacylation|Heme and Siroheme Biosynthesis	0	0	1000	6.1.1.17,6.1.1.24	ATP + L-Glutamate + H+ + tRNA-Glu -> PPi + AMP + L-Glutamyl-tRNA-Glu		0	0	0	0	0	0	0	0	0	0	0	0	0	0	0	0	0	0	0	0	0	0	0	0	0	0	0	0	0	0	0	0	0	0	0	0	0
rxn00980_c0	2-Phosphoglycolate phosphohydrolase c0	S_cpd00001[c] + S_cpd00727[c] -> S_cpd00009[c] + S_cpd00067[c] + S_cpd00139[c]	(CAETHG_RS12275)	CAETHG_RS12275		Photorespiration (oxidative C2 cycle)|2-phosphoglycolate salvage|Glycolate, glyoxylate interconversions	0	0	1000	3.1.3.18	H2O + 2-Phosphoglycolate -> Phosphate + H+ + Glycolate		0	0	0	0	0	0	0	0	0	0	0	0	0	0	0	0	0	0	0	0	0	0	0	0	0	0	0	0	0	0	0	0	0	0	0	0	0
rxn05244_c0	Branched chain amino acid:H+ symporter (Isoleucine) c0	S_cpd00067[e] + S_cpd00322[e] <=> S_cpd00067[c] + S_cpd00322[c]	(CAETHG_RS19045)	CAETHG_RS19045		Transport Reactions	1	-1000	1000	proton	H+ + L-Isoleucine <=> H+ + L-Isoleucine		0	0	0	0	0	0	0	0	0	0	0	0	0	0	0	0	0	0	0	0	0	0	0	0	0	0	0	0	0	0	0	0	0	0	0	0	0
rxn10285_c0	isotetradecanoyl-UDP-glucosyltransferase (monoglucosyl) c0	S_cpd00026[c] + S_cpd15703[c] <=> S_cpd00014[c] + S_cpd15742[c]	(CAETHG_RS11420)	CAETHG_RS11420		Teichoic and lipoteichoic acids biosynthesis	1	-1000	1000		UDP-glucose + 1,2-Diisotetradecanoyl-sn-glycerol <=> UDP + Monoglucosyl-1,2 diisotetradecanoylglycerol		0	0	0	0	0	0	0	0	0	0	0	0	0	0	0	0	0	0	0	0	0	0	0	0	0	0	0	0	0	0	0	0	0	0	0	0	0
rxn10312_c0	isotetradecanoyl-lipoteichoic acid synthesis (n-24), linked, N-acetylglucosamine substituted c0	24 S_cpd00037[c] + S_cpd15751[c] <=> 24 S_cpd00014[c] + S_cpd15769[c]	(CAETHG_RS11510)	CAETHG_RS11510		Teichoic and lipoteichoic acids biosynthesis|Methicillin resistance in Staphylococci|Teichuronic acid biosynthesis	1	-1000	1000	2.7.8.-	24 UDP-N-acetylglucosamine + Isotetradecanoyllipoteichoic acid (n-24), linked, unsubstituted <=> 24 UDP + Isotetradecanoyllipoteichoic acid (n-24), linked, N-acetyl-D-glucosamine		0	0	0	0	0	0	0	0	0	0	0	0	0	0	0	0	0	0	0	0	0	0	0	0	0	0	0	0	0	0	0	0	0	0	0	0	0
rxn00159_c0	(S)-Malate:NADP+ oxidoreductase(oxaloacetate-decarboxylating) c0	S_cpd00003[c] + S_cpd00130[c] -> S_cpd00004[c] + S_cpd00011[c] + S_cpd00020[c]	((CAETHG_RS02875) or (CAETHG_RS05035))	CAETHG_RS02875 CAETHG_RS05035		Pyruvate Metabolism	0	0	1000	1.1.1.38	NAD + L-Malate -> NADH + CO2 + Pyruvate		0	0	0	0	0	0	0	0	0	0	0	0	0	0	0	0	0	0	0	0	0	0	0	0	0	0	0	0	0	0	0	0	0	0	0	0	0
rxn05546_c0	Dipeptide transport via ABC system (gly-asn) c0	S_cpd00001[c] + S_cpd00002[c] + S_cpd11581[e] -> S_cpd00008[c] + S_cpd00009[c] + S_cpd00067[c] + S_cpd11581[c]	(CAETHG_RS07520)	CAETHG_RS07520		ABC transporter dipeptide (TC 3.A.1.5.2)	0	0	1000		H2O + ATP + gly-asn-L -> ADP + Phosphate + H+ + gly-asn-L		0	0	0	0	0	0	0	0	0	0	0	0	0	0	0	0	0	0	0	0	0	0	0	0	0	0	0	0	0	0	0	0	0	0	0	0	0
rxn02508_c0	N-(5-Phospho-beta-D-ribosyl)anthranilate ketol-isomerase c0	S_cpd02642[c] <=> S_cpd00956[c]	(CAETHG_RS18195)	CAETHG_RS18195		Tryptophan synthesis	1	-1000	1000	5.3.1.24	N-5-phosphoribosyl-anthranilate <=> 1-(2-carboxyphenylamino)-1-deoxyribulose 5-phosphate		0.000931569	0.000931569	0.000931569	0.00095429	0.00093725	9.83857e-06	0.00095429	0.00095429	0.000931569	0.00095429	0.00094861	9.83857e-06	0.000931569	0.00095429	0.00094293	1.13606e-05	0.00095429	0.000931569	0.00094293	1.13606e-05	0.000931569	0.000931569	0.000931569	0.000931569	0	0.00095429	0.00095429	0.00095429	0.000977012	0.000959971	9.83857e-06	0.00095429	0.00095429	0.00095429	0	0.000454424	0.000445336
rxn02190_c0	5,6-Dihydrothymine amidohydrolase c0	S_cpd00001[c] + S_cpd00673[c] -> S_cpd00067[c] + S_cpd03034[c]	((CAETHG_RS07195) or (CAETHG_RS02115))	CAETHG_RS02115 CAETHG_RS07195		Hydantoin metabolism|Pyrimidine utilisation	0	0	1000	3.5.2.2	H2O + Dihydrothymine -> H+ + 3-Ureidoisobutyrate		0	0	0	0	0	0	0	0	0	0	0	0	0	0	0	0	0	0	0	0	0	0	0	0	0	0	0	0	0	0	0	0	0	0	0	0	0
rxn00127_c0	S-Adenosyl-L-methionine carboxy-lyase c0	S_cpd00017[c] + S_cpd00067[c] -> S_cpd00011[c] + S_cpd00837[c]	(CAETHG_RS01030)	CAETHG_RS01030		Polyamine Metabolism	0	0	1000	4.1.1.50	S-Adenosyl-L-methionine + H+ -> CO2 + S-Adenosylmethioninamine		0	0	0	0	0	0	0	0	0	0	0	0	0	0	0	0	0	0	0	0	0	0	0	0	0	0	0	0	0	0	0	0	0	0	0	0	0
rxn00394_c0	L-Arginine amidinohydrolase c0	S_cpd00001[c] + S_cpd00051[c] -> S_cpd00064[c] + S_cpd00073[c]	(CAETHG_RS01370)	CAETHG_RS01370		Arginine and Ornithine Degradation	0	0	1000	3.5.3.1	H2O + L-Arginine -> Ornithine + Urea		0	0	0	0	0	0	0	0	0	0	0	0	0	0	0	0	0	0	0	0	0	0	0	0	0	0	0	0	0	0	0	0	0	0	0	0	0
rxn05251_c0	FACOAL170(anteiso) c0	S_cpd00002[c] + S_cpd00010[c] + S_cpd00067[c] + S_cpd11433[c] -> S_cpd00012[c] + S_cpd00018[c] + S_cpd11434[c]	(CAETHG_RS08635)	CAETHG_RS08635		Fatty acid degradation regulons|Unsaturated Fatty Acid Metabolism|Carbonate Biomineralization|n-Phenylalkanoic acid degradation|Biotin biosynthesis	0	0	1000	6.2.1.3	ATP + CoA + H+ + fa12 -> PPi + AMP + fa12coa		0	0	0	0	0	0	0	0	0	0	0	0	0	0	0	0	0	0	0	0	0	0	0	0	0	0	0	0	0	0	0	0	0	0	0	0	0
rxn05516_c0	cadmium transport out via ABC system c0	S_cpd00001[c] + S_cpd00002[c] + S_cpd01012[c] -> S_cpd00008[c] + S_cpd00009[c] + S_cpd00067[c] + S_cpd01012[e]	((CAETHG_RS04295) or (CAETHG_RS02640))	CAETHG_RS02640 CAETHG_RS04295			0	0	1000		H2O + ATP + Cd2+ -> ADP + Phosphate + H+ + Cd2+		0	0	0	0	0	0	0	0	0	0	0	0	0	0	0	0	0	0	0	0	0	0	0	0	0	0	0	0	0	0	0	0	0	0	0	0	0
rxn05608_c0	Maltotriose transport via ABC system c0	S_cpd00001[c] + S_cpd00002[c] + S_cpd01262[e] -> S_cpd00008[c] + S_cpd00009[c] + S_cpd00067[c] + S_cpd01262[c]	(() and (CAETHG_RS06295) and () and ())	CAETHG_RS06295		Maltose and Maltodextrin utilisation	0	0	1000		H2O + ATP + Amylotriose -> ADP + Phosphate + H+ + Amylotriose		0	0	0	0	0	0	0	0	0	0	0	0	0	0	0	0	0	0	0	0	0	0	0	0	0	0	0	0	0	0	0	0	0	0	0	0	0
rxn02938_c0	1-(5-Phospho-D-ribosyl)-5-amino-4-imidazolecarboxylate carboxy-lyase c0	S_cpd00067[c] + S_cpd02893[c] -> S_cpd00011[c] + S_cpd02140[c]	(CAETHG_RS14490)	CAETHG_RS14490		De Novo Purine Biosynthesis	0	0	1000	4.1.1.21	H+ + 5-Phosphoribosyl-4-carboxy-5-aminoimidazole -> CO2 + AIR		0	0	0	0	0	0	0	0	0	0	0	0	0	0	0	0	0	0	0	0	0	0	0	0	0	0	0	0	0	0	0	0	0	0	0	0	0
rxn05339_c0	(3R)-3-Hydroxybutanoyl-[acyl-carrier protein]:NADP+ oxidoreductase c0	S_cpd00006[c] + S_cpd11478[c] <=> S_cpd00005[c] + S_cpd00067[c] + S_cpd11488[c]	((CAETHG_RS08435) or (CAETHG_RS00375) or (CAETHG_RS00860) or (CAETHG_RS04365) or (CAETHG_RS06705) or (CAETHG_RS03500) or (CAETHG_RS04680) or (CAETHG_RS09990))	CAETHG_RS00375 CAETHG_RS00860 CAETHG_RS03500 CAETHG_RS04365 CAETHG_RS04680 CAETHG_RS06705 CAETHG_RS08435 CAETHG_RS09990		mycolic acid synthesis|Fatty Acid Biosynthesis FASII	1	-1000	1000		NADP + (R)-3-Hydroxybutanoyl-[acyl-carrier protein] <=> NADPH + H+ + Acetoacetyl-ACP		0	0	0	0	0	0	0	0	0	0	0	0	0	0	0	0	0	0	0	0	0	0	0	0	0	0	0	0	0	0	0	0	0	0	0	0	0
rxn05644_c0	D-ribose transport out via ABC system c0	S_cpd00001[c] + S_cpd00002[c] + S_cpd00105[c] -> S_cpd00008[c] + S_cpd00009[c] + S_cpd00067[c] + S_cpd00105[e]	((CAETHG_RS10995) and ((CAETHG_RS11000) or (CAETHG_RS08750)) and ((CAETHG_RS11005) or (CAETHG_RS08745)) and ())	CAETHG_RS08745 CAETHG_RS08750 CAETHG_RS10995 CAETHG_RS11000 CAETHG_RS11005		D-ribose utilisation	0	0	1000		H2O + ATP + D-Ribose -> ADP + Phosphate + H+ + D-Ribose		0	0	0	0	0	0	0	0	0	0	0	0	0	0	0	0	0	0	0	0	0	0	0	0	0	0	0	0	0	0	0	0	0	0	0	0	0
rxn00569_c0	ammonium-hydroxide:NAD(P)+ oxidoreductase c0	3 S_cpd00005[c] + 5 S_cpd00067[c] + S_cpd00075[c] -> 2 S_cpd00001[c] + 3 S_cpd00006[c] + S_cpd00013[c]	(((CAETHG_RS02080) or (CAETHG_RS14770)) or (CAETHG_RS14765))	CAETHG_RS02080 CAETHG_RS14765 CAETHG_RS14770		Nitrate and nitrite ammonification	0	0	1000	1.7.1.4	3 NADPH + 5 H+ + Nitrite -> 2 H2O + 3 NADP + NH3		0	0	0	0	0	0	0	0	0	0	0	0	0	0	0	0	0	0	0	0	0	0	0	0	0	0	0	0	0	0	0	0	0	0	0	0	0
rxn00139_c0	AMP:pyrophosphate phosphoribosyltransferase c0	S_cpd00103[c] + S_cpd00128[c] -> S_cpd00012[c] + S_cpd00018[c]	(CAETHG_RS06100)	CAETHG_RS06100		cAMP signaling in bacteria|Stringent Response, (p)ppGpp metabolism|Purine conversions	0	0	1000	2.4.2.7,2.4.2.8	PRPP + Adenine -> PPi + AMP		0.00392298	0.00392298	0.00392298	0.00401866	0.0039469	4.14317e-05	0.00401866	0.00401866	0.00392298	0.00401866	0.00399474	4.14317e-05	0.00392298	0.00401866	0.00397082	4.78412e-05	0.00401866	0.00392298	0.00397082	4.78412e-05	0.00392298	0.00392298	0.00392298	0.00392298	0	0.00401866	0.00401866	0.00401866	0.00411435	0.00404258	4.14317e-05	0.00401866	0.00401866	0.00401866	0	0.00191365	0.00187538
rxn05736_c0	fatty-acid--CoA ligase (tetradecanoate) c0	S_cpd00002[c] + S_cpd00010[c] + S_cpd00067[c] + S_cpd03847[c] -> S_cpd00012[c] + S_cpd00018[c] + S_cpd01695[c]	(CAETHG_RS08635)	CAETHG_RS08635		Fatty acid degradation regulons|Unsaturated Fatty Acid Metabolism|Carbonate Biomineralization|n-Phenylalkanoic acid degradation|Biotin biosynthesis	0	0	1000	6.2.1.3	ATP + CoA + H+ + Myristic acid -> PPi + AMP + Myristoyl-CoA		0	0	0	0	0	0	0	0	0	0	0	0	0	0	0	0	0	0	0	0	0	0	0	0	0	0	0	0	0	0	0	0	0	0	0	0	0
rxn05527_c0	cytosine transport in via proton symport c0	S_cpd00067[e] + S_cpd00307[e] <=> S_cpd00067[c] + S_cpd00307[c]	((CAETHG_RS19875) or (CAETHG_RS17850))	CAETHG_RS17850 CAETHG_RS19875		Transport Reactions	1	-1000	1000	proton	H+ + Cytosine <=> H+ + Cytosine		0	0	0	0	0	0	0	0	0	0	0	0	0	0	0	0	0	0	0	0	0	0	0	0	0	0	0	0	0	0	0	0	0	0	0	0	0
rxn10253_c0	isoheptadecanoyl-Diacylglycerol kinase c0	S_cpd00002[c] + S_cpd15701[c] <=> S_cpd00008[c] + S_cpd15677[c]	(CAETHG_RS14270)	CAETHG_RS14270		Glycerolipid and Glycerophospholipid Metabolism in Bacteria	1	-1000	1000	2.7.1.107	ATP + 1,2-Diisoheptadecanoyl-sn-glycerol <=> ADP + 1,2-diisoheptadecanoyl-sn-glycerol 3-phosphate		0	0	0	0	0	0	0	0	0	0	0	0	0	0	0	0	0	0	0	0	0	0	0	0	0	0	0	0	0	0	0	0	0	0	0	0	0
rxn00931_c0	L-Proline:NADP+ 5-oxidoreductase c0	S_cpd00006[c] + S_cpd00129[c] <=> S_cpd00005[c] + S_cpd00067[c] + S_cpd02431[c]	(CAETHG_RS07730)	CAETHG_RS07730		Proline biosynthesis	1	-1000	0	1.5.1.2	NADP + L-Proline <=> NADPH + H+ + 1-Pyrroline-5-carboxylate		0	0	0	0	0	0	0	0	0	0	0	0	0	0	0	0	0	0	0	0	0	0	0	0	0	0	0	0	0	0	0	0	0	0	0	0	0
rxn03904_c0	UDPMurAc(oyl-L-Ala-D-gamma-Glu-L-Lys-D-Ala-D-Ala):undecaprenyl- c0	S_cpd00286[c] + S_cpd02968[c] <=> S_cpd00091[c] + S_cpd03494[c]	(CAETHG_RS15470)	CAETHG_RS15470		Peptidoglycan Biosynthesis|Peptidoglycan Biosynthesis 2	1	-1000	1000	2.7.8.13	Undecaprenylphosphate + UDP-N-acetylmuramoyl-L-alanyl-D-glutamyl-6-carboxy-L-lysyl-D-alanyl- D-alanine <=> UMP + Undecaprenyl-diphospho-N-acetylmuramoyl-L-alanyl-D-glutamyl-meso-2-6-diaminopimeloyl-D-alanyl-D-alanine		0	0	0	0	0	0	0	0	0	0	0	0	0	0	0	0	0	0	0	0	0	0	0	0	0	0	0	0	0	0	0	0	0	0	0	0	0
rxn02465_c0	N-Acetyl-L-glutamate-5-semialdehyde:NADP+ 5-oxidoreductase c0	S_cpd00005[c] + S_cpd02552[c] -> S_cpd00006[c] + S_cpd00009[c] + S_cpd00918[c]	(CAETHG_RS01145)	CAETHG_RS01145		Arginine biosynthesis	0	0	1000	2.7.2.8	NADPH + n-acetylglutamyl-phosphate -> NADP + Phosphate + 2-Acetamido-5-oxopentanoate		0	0	0	0	0	0	0	0	0	0	0	0	0	0	0	0	0	0	0	0	0	0	0	0	0	0	0	0	0	0	0	0	0	0	0	0	0
rxn08335_c0	dihydoorotic acid dehydrogenase (quinone8) c0	S_cpd00282[c] + S_cpd15560[c] -> S_cpd00247[c] + S_cpd15561[c]	((CAETHG_RS07115) and (CAETHG_RS07110))	CAETHG_RS07110 CAETHG_RS07115		De Novo Pyrimidine Synthesis|YgfZ	0	0	1000	1.3.3.1	S-Dihydroorotate + Ubiquinone-8 -> Orotate + Ubiquinol-8		0.00983736	0.00983736	0.00983736	0.0100773	0.00989734	0.000103895	0.0100773	0.0100773	0.00983736	0.0100773	0.0100173	0.000103895	0.00983736	0.0100773	0.00995733	0.000119968	0.0100773	0.00983736	0.00995733	0.000119968	0.00983736	0.00983736	0.00983736	0.00983736	5.93682e-16	0.0100773	0.0100773	0.0100773	0.0103172	0.0101373	0.000103895	0.0100773	0.0100773	0.0100773	0	0.00479871	0.00470274
rxn09205_c0	Phosphatidylserine syntase (n-C12:0) c0	S_cpd00054[c] + S_cpd15417[c] -> S_cpd00046[c] + S_cpd00067[c] + S_cpd15552[c]	(CAETHG_RS11850)	CAETHG_RS11850		Glycerolipid and Glycerophospholipid Metabolism in Bacteria	0	0	1000	2.7.8.8	L-Serine + CDP-1,2-didodecanoylglycerol -> CMP + H+ + phosphatidylserine didodecanoyl		0	0	0	0	0	0	0	0	0	0	0	0	0	0	0	0	0	0	0	0	0	0	0	0	0	0	0	0	0	0	0	0	0	0	0	0	0
rxn05957_c0	O-Succinyl-L-homoserine succinate-lyase (adding cysteine) c0	S_cpd00239[c] + S_cpd00822[c] -> S_cpd00036[c] + S_cpd00067[c] + S_cpd00135[c]	((CAETHG_RS13550) or (CAETHG_RS19855) or (CAETHG_RS02370))	CAETHG_RS02370 CAETHG_RS13550 CAETHG_RS19855		Methionine_Biosynthesis	0	0	1000	2.5.1.48	H2S + O-Succinyl-L-homoserine -> Succinate + H+ + Homocysteine		0	0	0	0	0	0	0	0	0	0	0	0	0	0	0	0	0	0	0	0	0	0	0	0	0	0	0	0	0	0	0	0	0	0	0	0	0
rxn00549_c0	D-Fructose-1,6-bisphosphate 1-phosphohydrolase c0	S_cpd00001[c] + S_cpd00290[c] -> S_cpd00009[c] + S_cpd00067[c] + S_cpd00072[c]	(CAETHG_RS04285)	CAETHG_RS04285		Pentose Phosphate Pathway	0	0	1000	3.1.3.11	H2O + D-fructose-1,6-bisphosphate -> Phosphate + H+ + D-fructose-6-phosphate		0	0	0	0	0	0	0	0	0	0	0	0	0	0	0	0	0	0	0	0	0	0	0	0	0	0	0	0	0	0	0	0	0	0	0	0	0
rxn03030_c0	Acetyl-CoA:L-2,3,4,5-tetrahydrodipicolinate N2-acetyltransferase c0	S_cpd00001[c] + S_cpd00022[c] + S_cpd02465[c] <=> S_cpd00010[c] + S_cpd03289[c]	(CAETHG_RS06545)	CAETHG_RS06545		Lysine biosynthesis	1	-1000	1000	2.3.1.89	H2O + Acetyl-CoA + tetrahydrodipicolinate <=> CoA + L-2-Acetamido-6-oxopimelate		0.018187	0.018187	0.018187	0.0186306	0.0182979	0.000192078	0.0186306	0.0186306	0.018187	0.0186306	0.0185197	0.000192078	0.018187	0.0186306	0.0184088	0.000221792	0.0186306	0.018187	0.0184088	0.000221792	0.018187	0.018187	0.018187	0.018187	0	0.0186306	0.0186306	0.0186306	0.0190741	0.0187415	0.000192078	0.0186306	0.0186306	0.0186306	0	0.00887169	0.00869426
rxn01257_c0	chorismate:L-glutamine aminotransferase c0	S_cpd00053[c] + S_cpd00216[c] <=> S_cpd00023[c] + S_cpd08210[c]	((CAETHG_RS07250) or (CAETHG_RS07255) or (CAETHG_RS18180))	CAETHG_RS07250 CAETHG_RS07255 CAETHG_RS18180		4-aminobenzoate synthesis	1	-1000	1000	2.6.1.85	L-Glutamine + Chorismate <=> L-Glutamate + ADC		3.6531e-05	3.6531e-05	3.6531e-05	3.7422e-05	3.67537e-05	3.85814e-07	3.7422e-05	3.7422e-05	3.6531e-05	3.7422e-05	3.71992e-05	3.85814e-07	3.6531e-05	3.7422e-05	3.69765e-05	4.455e-07	3.7422e-05	3.6531e-05	3.69765e-05	4.455e-07	3.6531e-05	3.6531e-05	3.6531e-05	3.6531e-05	0	3.7422e-05	3.7422e-05	3.7422e-05	3.8313e-05	3.76447e-05	3.85814e-07	3.7422e-05	3.7422e-05	3.7422e-05	0	1.782e-05	1.74636e-05
rxn05029_c0	ATP:cobinamide Cobeta-adenosyltransferase c0	S_cpd00002[c] + S_cpd03422[c] <=> S_cpd00421[c] + S_cpd03918[c]	(CAETHG_RS05315)	CAETHG_RS05315		Cobalamin synthesis|Coenzyme B12 biosynthesis	1	-1000	1000	2.5.1.17	ATP + Cobinamide <=> Triphosphate + Adenosyl cobinamide		0	0	0	0	0	0	0	0	0	0	0	0	0	0	0	0	0	0	0	0	0	0	0	0	0	0	0	0	0	0	0	0	0	0	0	0	0
rxn05401_c0	13-methyl-3-oxo-tetra-decanoyl-ACP:NADP+ oxidoreductase c0	S_cpd00005[c] + S_cpd00067[c] + S_cpd11537[c] <=> S_cpd00006[c] + S_cpd11538[c]	((CAETHG_RS08435) or (CAETHG_RS00375) or (CAETHG_RS00860) or (CAETHG_RS04365) or (CAETHG_RS06705) or (CAETHG_RS03500) or (CAETHG_RS04680) or (CAETHG_RS09990))	CAETHG_RS00375 CAETHG_RS00860 CAETHG_RS03500 CAETHG_RS04365 CAETHG_RS04680 CAETHG_RS06705 CAETHG_RS08435 CAETHG_RS09990		mycolic acid synthesis|Fatty Acid Biosynthesis FASII	1	-1000	1000	1.1.1.0	NADPH + H+ + 13-methyl-3-oxo-tetra-decanoyl-ACP <=> NADP + 13-methyl-3-hydroxy-tetra-decanoyl-ACP		0	0	0	0	0	0	0	0	0	0	0	0	0	0	0	0	0	0	0	0	0	0	0	0	0	0	0	0	0	0	0	0	0	0	0	0	0
rxn05613_c0	L-methionine S-oxide transport via ABC system c0	S_cpd00001[c] + S_cpd00002[c] + S_cpd01914[e] -> S_cpd00008[c] + S_cpd00009[c] + S_cpd00067[c] + S_cpd01914[c]	(((CAETHG_RS13380) or (CAETHG_RS05455)) and ((CAETHG_RS13375) or (CAETHG_RS12470)) and ())	CAETHG_RS05455 CAETHG_RS12470 CAETHG_RS13375 CAETHG_RS13380		Staphylococcal pathogenicity islands SaPI|Methionine Biosynthesis|Methionine Degradation	0	0	1000		H2O + ATP + L-Methionine S-oxide -> ADP + Phosphate + H+ + L-Methionine S-oxide		0	0	0	0	0	0	0	0	0	0	0	0	0	0	0	0	0	0	0	0	0	0	0	0	0	0	0	0	0	0	0	0	0	0	0	0	0
rxn01265_c0	Nicotinate D-ribonucleotide:pyrophosphate phosphoribosyltransferase c0	S_cpd00012[c] + S_cpd00873[c] <=> S_cpd00067[c] + S_cpd00103[c] + S_cpd00218[c]	(CAETHG_RS16830)	CAETHG_RS16830		Redox-dependent regulation of nucleus processes|NAD and NADP cofactor biosynthesis global|NAD regulation	1	-1000	1000	2.4.2.11	PPi + Nicotinate ribonucleotide <=> H+ + PRPP + Niacin		0	0	0	0	0	0	0	0	0	0	0	0	0	0	0	0	0	0	0	0	0	0	0	0	0	0	0	0	0	0	0	0	0	0	0	0	0
rxn03535_c0	ATP:cob(I)yrinic acid-a,c-diamide Cobeta-adenosyltransferase c0	S_cpd00002[c] + S_cpd03915[c] <=> S_cpd00421[c] + S_cpd03916[c]	(CAETHG_RS05315)	CAETHG_RS05315		Coenzyme B12 biosynthesis	1	-1000	1000	2.5.1.17	ATP + Cob(I)yrinate diamide <=> Triphosphate + Adenosyl cobyrinate diamide		0	0	0	0	0	0	0	0	0	0	0	0	0	0	0	0	0	0	0	0	0	0	0	0	0	0	0	0	0	0	0	0	0	0	0	0	0
rxn01740_c0	Shikimate:NADP+ 5-oxidoreductase c0	S_cpd00006[c] + S_cpd00383[c] <=> S_cpd00005[c] + S_cpd00067[c] + S_cpd01716[c]	((CAETHG_RS04140) or (CAETHG_RS04320))	CAETHG_RS04140 CAETHG_RS04320		Chorismate synthesis	1	-1000	1000	1.1.1.25	NADP + Shikimate <=> NADPH + H+ + 3-Dehydroshikimate		-0.00573255	-0.00573255	-0.00573255	-0.00587236	-0.0057675	6.05431e-05	-0.00587236	-0.00587236	-0.00573255	-0.00587236	-0.00583741	6.05431e-05	-0.00573255	-0.00587236	-0.00580246	6.99091e-05	-0.00587236	-0.00573255	-0.00580246	6.99091e-05	-0.00573255	-0.00573255	-0.00573255	-0.00573255	0	-0.00587236	-0.00587236	-0.00587236	-0.00601218	-0.00590732	6.05431e-05	-0.00587236	-0.00587236	-0.00587236	0	-0.00279636	-0.00274044
rxn01217_c0	dCMP aminohydrolase c0	S_cpd00001[c] + S_cpd00067[c] + S_cpd00206[c] -> S_cpd00013[c] + S_cpd00299[c]	(CAETHG_RS11505)	CAETHG_RS11505			0	0	1000	3.5.4.12	H2O + H+ + dCMP -> NH3 + dUMP		0	0	0	0	0	0	0	0	0	0	0	0	0	0	0	0	0	0	0	0	0	0	0	0	0	0	0	0	0	0	0	0	0	0	0	0	0
rxn08548_c0	glycerol-3-phosphate acyltransferase (C14:1) c0	S_cpd00080[c] + S_cpd15294[c] -> S_cpd11493[c] + S_cpd15330[c]	(() and (CAETHG_RS16510))	CAETHG_RS16510		Glycerolipid and Glycerophospholipid Metabolism in Bacteria	0	0	1000	2.3.1.15	Glycerol-3-phosphate + Tetradecenoyl-ACP -> ACP + 1-tetradec-7-enoyl-sn-glycerol 3-phosphate		0	0	0	0	0	0	0	0	0	0	0	0	0	0	0	0	0	0	0	0	0	0	0	0	0	0	0	0	0	0	0	0	0	0	0	0	0
rxn08546_c0	glycerol-3-phosphate acyltransferase (C12:0) c0	S_cpd00080[c] + S_cpd11468[c] -> S_cpd11493[c] + S_cpd15325[c]	(() and (CAETHG_RS16510))	CAETHG_RS16510		Glycerolipid and Glycerophospholipid Metabolism in Bacteria	0	0	1000	2.3.1.15	Glycerol-3-phosphate + Dodecanoyl-ACP -> ACP + 1-dodecanoyl-sn-glycerol 3-phosphate		0	0	0	0	0	0	0	0	0	0	0	0	0	0	0	0	0	0	0	0	0	0	0	0	0	0	0	0	0	0	0	0	0	0	0	0	0
rxn12847_c0	Gly-Try aminopeptidase c0	S_cpd00001[c] + S_cpd15606[c] <=> S_cpd00033[c] + S_cpd00069[c]	(((CAETHG_RS04585) or (CAETHG_RS15660)) or (CAETHG_RS03545) or (CAETHG_RS07155))	CAETHG_RS03545 CAETHG_RS04585 CAETHG_RS07155 CAETHG_RS15660		Recycling of Peptidoglycan Amino Acids|Protein degradation	1	-1000	1000	3.4.11.2	H2O + Gly-Tyr <=> Glycine + L-Tyrosine		0	0	0	0	0	0	0	0	0	0	0	0	0	0	0	0	0	0	0	0	0	0	0	0	0	0	0	0	0	0	0	0	0	0	0	0	0
rxn05371_c0	8-methyl-decanoyl-ACP:malonyl-[acyl-carrier-protein] C-acyltransferase (decarboxylating) c0	S_cpd00067[c] + S_cpd11492[c] + S_cpd11507[c] -> S_cpd00011[c] + S_cpd11493[c] + S_cpd11508[c]	((CAETHG_RS10005) and (CAETHG_RS09985))	CAETHG_RS09985 CAETHG_RS10005		Fatty Acid Biosynthesis FASII	0	0	1000	2.3.1.0	H+ + Malonyl-acyl-carrierprotein + 8-methyl-decanoyl-ACP -> CO2 + ACP + 10-methyl-3-oxo-dodecanoyl-ACP		0	0	0	0	0	0	0	0	0	0	0	0	0	0	0	0	0	0	0	0	0	0	0	0	0	0	0	0	0	0	0	0	0	0	0	0	0
rxn05347_c0	Acyl-[acyl-carrier-protein]:malonyl-[acyl-carrier-protein] c0	S_cpd00067[c] + S_cpd11492[c] + S_cpd11494[c] -> S_cpd00011[c] + S_cpd11488[c] + S_cpd11493[c]	((CAETHG_RS10005) and (CAETHG_RS09985))	CAETHG_RS09985 CAETHG_RS10005		Fatty Acid Biosynthesis FASII	0	0	1000	2.3.1.41,2.3.1.85,2.3.1.86,2.3.1.179,2.3.1.180	H+ + Malonyl-acyl-carrierprotein + Acetyl-ACP -> CO2 + Acetoacetyl-ACP + ACP		0	0	0	0	0	0	0	0	0	0	0	0	0	0	0	0	0	0	0	0	0	0	0	0	0	0	0	0	0	0	0	0	0	0	0	0	0
rxn05338_c0	(3R)-3-Hydroxydecanoyl-[acyl-carrier-protein]:NADP+ oxidoreductase c0	S_cpd00006[c] + S_cpd11482[c] <=> S_cpd00005[c] + S_cpd00067[c] + S_cpd11487[c]	((CAETHG_RS08435) or (CAETHG_RS00375) or (CAETHG_RS00860) or (CAETHG_RS04365) or (CAETHG_RS06705) or (CAETHG_RS03500) or (CAETHG_RS04680) or (CAETHG_RS09990))	CAETHG_RS00375 CAETHG_RS00860 CAETHG_RS03500 CAETHG_RS04365 CAETHG_RS04680 CAETHG_RS06705 CAETHG_RS08435 CAETHG_RS09990		mycolic acid synthesis|Fatty Acid Biosynthesis FASII	1	-1000	1000		NADP + (R)-3-Hydroxydecanoyl-[acyl-carrier protein] <=> NADPH + H+ + 3-oxodecanoyl-acp		0	0	0	0	0	0	0	0	0	0	0	0	0	0	0	0	0	0	0	0	0	0	0	0	0	0	0	0	0	0	0	0	0	0	0	0	0
rxn00416_c0	L-aspartate:L-glutamine amido-ligase (AMP-forming) c0	S_cpd00001[c] + S_cpd00002[c] + S_cpd00041[c] + S_cpd00053[c] -> S_cpd00012[c] + S_cpd00018[c] + S_cpd00023[c] + S_cpd00132[c]	((CAETHG_RS03570) or (CAETHG_RS12920) or (CAETHG_RS19030))	CAETHG_RS03570 CAETHG_RS12920 CAETHG_RS19030		Asparaginine biosynthesis	0	0	1000	6.3.5.4	H2O + ATP + L-Aspartate + L-Glutamine -> PPi + AMP + L-Glutamate + L-Asparagine		0.00337965	0.00337965	0.00337965	0.00346208	0.00340025	3.56934e-05	0.00346208	0.00346208	0.00337965	0.00346208	0.00344147	3.56934e-05	0.00337965	0.00346208	0.00342086	4.12152e-05	0.00346208	0.00337965	0.00342086	4.12152e-05	0.00337965	0.00337965	0.00337965	0.00337965	0	0.00346208	0.00346208	0.00346208	0.00354451	0.00348268	3.56934e-05	0.00346208	0.00346208	0.00346208	0	0.00164861	0.00161564
rxn00165_c0	L-serine ammonia-lyase c0	S_cpd00054[c] -> S_cpd00013[c] + S_cpd00020[c]	((CAETHG_RS05870) and (CAETHG_RS05875))	CAETHG_RS05870 CAETHG_RS05875		Serine degradation	0	0	1000	4.3.1.17	L-Serine -> NH3 + Pyruvate		0	0	0	0	0	0	0	0	0	0	0	0	0	0	0	0	0	0	0	0	0	0	0	0	0	0	0	0	0	0	0	0	0	0	0	0	0
rxn09112_c0	Phosphatidylglycerol synthase (n-C16:1) c0	S_cpd00080[c] + S_cpd15418[c] <=> S_cpd00046[c] + S_cpd15546[c]	((CAETHG_RS16745) or (CAETHG_RS06675))	CAETHG_RS06675 CAETHG_RS16745		Glycerolipid and Glycerophospholipid Metabolism in Bacteria	1	-1000	1000	2.7.8.5	Glycerol-3-phosphate + CDP-1,2-dihexadec-9-enoylglycerol <=> CMP + Phosphatidylglycerophosphate dihexadec-9-enoyl		0	0	0	0	0	0	0	0	0	0	0	0	0	0	0	0	0	0	0	0	0	0	0	0	0	0	0	0	0	0	0	0	0	0	0	0	0
rxn00903_c0	L-Valine:2-oxoglutarate aminotransferase c0	S_cpd00024[c] + S_cpd00156[c] <=> S_cpd00023[c] + S_cpd00123[c]	((CAETHG_RS14595) or (CAETHG_RS17440) or (CAETHG_RS14905))	CAETHG_RS14595 CAETHG_RS14905 CAETHG_RS17440		Valine biosynthesis	1	-1000	1000	2.6.1.42	2-Oxoglutarate + L-Valine <=> L-Glutamate + 3-Methyl-2-oxobutanoate		-0.112942	-0.122562	-0.137582	-0.124931	-0.124504	0.00878448	-0.134051	-0.109851	-0.159802	-0.116431	-0.130034	0.0193301	-0.0238848	-0.0244674	-0.0241761	0.000291278	-0.0244674	-0.0238848	-0.0241761	0.000291278	-0.126602	-0.0238848	-0.0939908	-0.0814924	0.0428552	-0.123531	-0.0620869	-0.0251369	-0.037633	-0.0620971	0.0378772	-0.100891	-0.144237	-0.122564	0.0216727	-0.056996	-0.055056
rxn00947_c0	Palmitate:CoA ligase (AMP-forming) c0	S_cpd00002[c] + S_cpd00010[c] + S_cpd00067[c] + S_cpd00214[c] -> S_cpd00012[c] + S_cpd00018[c] + S_cpd00134[c]	(CAETHG_RS08635)	CAETHG_RS08635		HMG CoA Synthesis	0	0	1000	6.2.1.3	ATP + CoA + H+ + Palmitate -> PPi + AMP + Palmitoyl-CoA		0	0	0	0	0	0	0	0	0	0	0	0	0	0	0	0	0	0	0	0	0	0	0	0	0	0	0	0	0	0	0	0	0	0	0	0	0
rxn05400_c0	11-methyl-dodecanoyl-ACP:malonyl-[acyl-carrier-protein] C-acyltransferase (decarboxylating) c0	S_cpd00067[c] + S_cpd11492[c] + S_cpd11536[c] -> S_cpd00011[c] + S_cpd11493[c] + S_cpd11537[c]	((CAETHG_RS10005) and (CAETHG_RS09985))	CAETHG_RS09985 CAETHG_RS10005		Fatty Acid Biosynthesis FASII	0	0	1000	2.3.1.0	H+ + Malonyl-acyl-carrierprotein + 11-methyl-dodecanoyl-ACP -> CO2 + ACP + 13-methyl-3-oxo-tetra-decanoyl-ACP		0	0	0	0	0	0	0	0	0	0	0	0	0	0	0	0	0	0	0	0	0	0	0	0	0	0	0	0	0	0	0	0	0	0	0	0	0
rxn05599_c0	cysteate transport via ABC system c0	S_cpd00001[c] + S_cpd00002[c] + S_cpd00395[e] -> S_cpd00008[c] + S_cpd00009[c] + S_cpd00067[c] + S_cpd00395[c]	(() and ((CAETHG_RS03470) or (CAETHG_RS19320)) and ((CAETHG_RS03465) or (CAETHG_RS19325)))	CAETHG_RS03465 CAETHG_RS03470 CAETHG_RS19320 CAETHG_RS19325		Alkanesulfonate assimilation|Alkanesulfonates utilisation	0	0	1000		H2O + ATP + L-Cysteate -> ADP + Phosphate + H+ + L-Cysteate		0	0	0	0	0	0	0	0	0	0	0	0	0	0	0	0	0	0	0	0	0	0	0	0	0	0	0	0	0	0	0	0	0	0	0	0	0
rxn08088_c0	1-octadecanoyl-sn-glycerol 3-phosphate O-acyltransferase (n-C18:0) c0	S_cpd15268[c] + S_cpd15329[c] -> S_cpd11493[c] + S_cpd15526[c]	((CAETHG_RS13530) or (CAETHG_RS08580))	CAETHG_RS08580 CAETHG_RS13530		Phosphate metabolism|Glycerolipid and Glycerophospholipid Metabolism in Bacteria	0	0	1000	2.3.1.51	Octadecanoyl-ACP + 1-octadecanoyl-sn-glycerol 3-phosphate -> ACP + 1,2-dioctadecanoyl-sn-glycerol 3-phosphate		0	0	0	0	0	0	0	0	0	0	0	0	0	0	0	0	0	0	0	0	0	0	0	0	0	0	0	0	0	0	0	0	0	0	0	0	0
rxn10343_c0	Mercury (Hg+2) ABC transporter c0	S_cpd00001[c] + S_cpd00002[c] + S_cpd00531[c] -> S_cpd00008[c] + S_cpd00009[c] + S_cpd00067[c] + S_cpd00531[e]	((CAETHG_RS04295) or (CAETHG_RS02640))	CAETHG_RS02640 CAETHG_RS04295			0	0	1000		H2O + ATP + Hg2+ -> ADP + Phosphate + H+ + Hg2+		0	0	0	0	0	0	0	0	0	0	0	0	0	0	0	0	0	0	0	0	0	0	0	0	0	0	0	0	0	0	0	0	0	0	0	0	0
rxn10310_c0	isoheptadecanoyl-lipoteichoic acid synthesis (n-24), linked, N-acetylglucosamine substituted c0	24 S_cpd00037[c] + S_cpd15749[c] <=> 24 S_cpd00014[c] + S_cpd15767[c]	(CAETHG_RS11510)	CAETHG_RS11510		Teichoic and lipoteichoic acids biosynthesis|Methicillin resistance in Staphylococci|Teichuronic acid biosynthesis	1	-1000	1000	2.7.8.-	24 UDP-N-acetylglucosamine + Isoheptadecanoyllipoteichoic acid (n-24), linked, unsubstituted <=> 24 UDP + Isoheptadecanoyllipoteichoic acid (n-24), linked, N-acetyl-D-glucosamine		0	0	0	0	0	0	0	0	0	0	0	0	0	0	0	0	0	0	0	0	0	0	0	0	0	0	0	0	0	0	0	0	0	0	0	0	0
rxn05512_c0	butanesulfonate transport via ABC system c0	S_cpd00001[c] + S_cpd00002[c] + S_cpd11596[e] -> S_cpd00008[c] + S_cpd00009[c] + S_cpd00067[c] + S_cpd11596[c]	(() and ((CAETHG_RS03470) or (CAETHG_RS19320)) and ((CAETHG_RS03465) or (CAETHG_RS19325)))	CAETHG_RS03465 CAETHG_RS03470 CAETHG_RS19320 CAETHG_RS19325		Alkanesulfonate assimilation|Alkanesulfonates utilisation	0	0	1000		H2O + ATP + butanesulfonate -> ADP + Phosphate + H+ + butanesulfonate		0	0	0	0	0	0	0	0	0	0	0	0	0	0	0	0	0	0	0	0	0	0	0	0	0	0	0	0	0	0	0	0	0	0	0	0	0
rxn00838_c0	IMP:L-aspartate ligase (GDP-forming) c0	S_cpd00038[c] + S_cpd00041[c] + S_cpd00114[c] -> S_cpd00009[c] + S_cpd00031[c] + 2 S_cpd00067[c] + S_cpd02375[c]	((CAETHG_RS10070) or (CAETHG_RS10635))	CAETHG_RS10070 CAETHG_RS10635		Histidine Biosynthesis|Purine conversions	0	0	1000	6.3.4.4	GTP + L-Aspartate + IMP -> Phosphate + GDP + 2 H+ + Adenylosuccinate		0.00427104	0.00427104	0.00427104	0.00437521	0.00429708	4.51076e-05	0.00437521	0.00437521	0.00427104	0.00437521	0.00434917	4.51076e-05	0.00427104	0.00437521	0.00432312	5.20858e-05	0.00437521	0.00427104	0.00432312	5.20858e-05	0.00427104	0.00427104	0.00427104	0.00427104	8.64005e-14	0.00437521	0.00437521	0.00437521	0.00447938	0.00440125	4.51076e-05	0.00437521	0.00437521	0.00437521	1.42109e-14	0.00208343	0.00204176
rxn00297_c0	UDP-N-acetyl-D-glucosamine 2-epimerase c0	S_cpd00037[c] <=> S_cpd00861[c]	((CAETHG_RS11515) or (CAETHG_RS06275))	CAETHG_RS06275 CAETHG_RS11515		Vibrio Polysaccharide (VPS) Biosynthesis|CMP-N-acetylneuraminate Biosynthesis|Streptococcus agalactiae virulome|Legionaminic Acid Biosynthesis|Sialic Acid Metabolism	1	-1000	1000	5.1.3.14	UDP-N-acetylglucosamine <=> UDP-N-acetyl-D-mannosamine		0	0	0	0	0	0	0	0	0	0	0	0	0	0	0	0	0	0	0	0	0	0	0	0	0	0	0	0	0	0	0	0	0	0	0	0	0
rxn00065_c0	ATP pyrophosphate-lyase (cyclizing) c0	S_cpd00002[c] -> S_cpd00012[c] + S_cpd00446[c]	(CAETHG_RS11735)	CAETHG_RS11735		cAMP signaling in bacteria	0	0	1000	4.6.1.1	ATP -> PPi + cAMP		0	0	0	0	0	0	0	0	0	0	0	0	0	0	0	0	0	0	0	0	0	0	0	0	0	0	0	0	0	0	0	0	0	0	0	0	0
rxn01454_c0	(S)-3-Hydroxy-3-methylglutaryl-CoA acetoacetyl-CoA-lyase c0	S_cpd00001[c] + S_cpd00022[c] + S_cpd00279[c] -> S_cpd00010[c] + S_cpd00067[c] + S_cpd00292[c]	(CAETHG_RS17585)	CAETHG_RS17585		Leucine Degradation and HMG-CoA Metabolism|Archaeal lipids|Mevalonate Branch of Isoprenoid Biosynthesis|Ketoisovalerate oxidoreductase|Isoprenoid Biosynthesis	0	0	1000	2.3.3.10,4.1.3.5	H2O + Acetyl-CoA + Acetoacetyl-CoA -> CoA + H+ + HMG-CoA		0	0	0	0	0	0	0	0	0	0	0	0	0	0	0	0	0	0	0	0	0	0	0	0	0	0	0	0	0	0	0	0	0	0	0	0	0
rxn05651_c0	sulfate transport in via proton symport c0	S_cpd00048[e] + S_cpd00067[e] <=> S_cpd00048[c] + S_cpd00067[c]				Inorganic Sulfur Assimilation	1	-1000	1000		Sulfate + H+ <=> Sulfate + H+		0.666599	0.619764	0.823479	0.605782	0.678906	0.0864549	0.367322	0.454672	0.412094	0.438157	0.418061	0.0329934	0.000174537	0.000178794	0.000176666	2.1285e-06	0.000178794	0.000174537	0.000176666	2.1285e-06	0.00396909	0.000174537	0.000174537	0.00143939	0.00178877	0.00255651	0.000178794	0.000178794	0.000183051	0.000774287	0.00102897	0.0513515	0.000178794	0.0257652	0.0255864	0.0386483	0.0718774
rxn05425_c0	10-methyl-undecanoyl-ACP:malonyl-[acyl-carrier-protein] C-acyltransferase (decarboxylating) c0	S_cpd00067[c] + S_cpd11492[c] + S_cpd11561[c] -> S_cpd00011[c] + S_cpd11493[c] + S_cpd11562[c]	((CAETHG_RS10005) and (CAETHG_RS09985))	CAETHG_RS09985 CAETHG_RS10005		Fatty Acid Biosynthesis FASII	0	0	1000	2.3.1.0	H+ + Malonyl-acyl-carrierprotein + 10-methyl-undecanoyl-ACP -> CO2 + ACP + 12-methyl-3-oxo-tridecanoyl-ACP		0	0	0	0	0	0	0	0	0	0	0	0	0	0	0	0	0	0	0	0	0	0	0	0	0	0	0	0	0	0	0	0	0	0	0	0	0
rxn10234_c0	isotetradecanoyl-phosphatidylserine decarboxylase c0	2 S_cpd00067[c] + S_cpd15691[c] <=> S_cpd00011[c] + S_cpd15697[c]	(CAETHG_RS10720)	CAETHG_RS10720		Glycerolipid and Glycerophospholipid Metabolism in Bacteria|Bacterial cyanide production and tolerance mechanisms	1	-1000	1000	4.1.1.65	2 H+ + Diisotetradecanoylphosphatidylserine <=> CO2 + Diisotetradecanoylphosphatidylethanolamine		0	0	0	0	0	0	0	0	0	0	0	0	0	0	0	0	0	0	0	0	0	0	0	0	0	0	0	0	0	0	0	0	0	0	0	0	0
rxn01859_c0	Deoxyadenosine:orthophosphate ribosyltransferase c0	S_cpd00009[c] + S_cpd00067[c] + S_cpd00438[c] <=> S_cpd00128[c] + S_cpd00509[c]	(CAETHG_RS00760)	CAETHG_RS00760		Xanthosine utilisation (xap region)	1	-1000	1000	2.4.2.1,2.4.2.4	Phosphate + H+ + Deoxyadenosine <=> Adenine + deoxyribose-1-phosphate		0	0	0	0	0	0	0	0	0	0	0	0	0	0	0	0	0	0	0	0	0	0	0	0	0	0	0	0	0	0	0	0	0	0	0	0	0
rxn10202_c0	palmitoyl-glycerol-3-phosphate O-acyltransferase c0	S_cpd00080[c] + S_cpd00134[c] -> S_cpd00010[c] + S_cpd15327[c]	(() and (CAETHG_RS16510))	CAETHG_RS16510		Glycerolipid and Glycerophospholipid Metabolism in Bacteria	0	0	1000	2.3.1.15	Glycerol-3-phosphate + Palmitoyl-CoA -> CoA + 1-hexadecanoyl-sn-glycerol 3-phosphate		0	0	0	0	0	0	0	0	0	0	0	0	0	0	0	0	0	0	0	0	0	0	0	0	0	0	0	0	0	0	0	0	0	0	0	0	0
rxn00337_c0	ATP:L-aspartate 4-phosphotransferase c0	S_cpd00002[c] + S_cpd00041[c] + S_cpd00067[c] <=> S_cpd00008[c] + S_cpd01977[c]	(CAETHG_RS05690)	CAETHG_RS05690		Aspartate degradation | Lysine, Threonine synthesis	1	-1000	1000	2.7.2.4	ATP + L-Aspartate + H+ <=> ADP + 4-Phospho-L-aspartate		0.0500187	0.0500187	0.0500187	0.0512386	0.0503236	0.000528261	0.0512386	0.0512386	0.0500187	0.0512386	0.0509336	0.000528261	0.0500187	0.0512386	0.0506286	0.000609984	0.0512386	0.0500187	0.0506286	0.000609984	0.0500187	0.0500187	0.0500187	0.0500187	1.07185e-13	0.0512386	0.0512386	0.0512386	0.0524586	0.0515436	0.000528261	0.0512386	0.0512386	0.0512386	0	0.0243993	0.0239114
rxn01452_c0	(S)-3-Hydroxybutanoyl-CoA:NADP+ oxidoreductase c0	S_cpd00006[c] + S_cpd00842[c] <=> S_cpd00005[c] + S_cpd00067[c] + S_cpd00279[c]	((CAETHG_RS02000) or (CAETHG_RS07695))	CAETHG_RS02000 CAETHG_RS07695		Anaerobic benzoate metabolism|Butanol Biosynthesis|Acetone Butanol Ethanol Synthesis|Acetyl-CoA fermentation to Butyrate|Polyhydroxybutyrate metabolism	1	-1000	1000	1.1.1.157	NADP + (S)-3-Hydroxybutyryl-CoA <=> NADPH + H+ + Acetoacetyl-CoA		0	0	0	0	0	0	0	0	0	0	0	0	0	0	0	0	0	0	0	0	0	0	0	0	0	0	0	0	0	0	0	0	0	0	0	0	0
rxn05673_c0	galacturonate transport in via proton symport c0	S_cpd00067[e] + S_cpd00280[e] <=> S_cpd00067[c] + S_cpd00280[c]	((CAETHG_RS12060) or (CAETHG_RS08620))	CAETHG_RS08620 CAETHG_RS12060		D-Galacturonate utilisation|Alginate metabolism	1	-1000	1000		H+ + D-Galacturonate <=> H+ + D-Galacturonate		0	0	0	0	0	0	0	0	0	0	0	0	0	0	0	0	0	0	0	0	0	0	0	0	0	0	0	0	0	0	0	0	0	0	0	0	0
rxn00777_c0	D-Ribose-5-phosphate ketol-isomerase c0	S_cpd00101[c] <=> S_cpd00171[c]	(CAETHG_RS11495)	CAETHG_RS11495		Pentose Phosphate Pathway	1	-1000	1000	5.3.1.6	ribose-5-phosphate <=> D-Ribulose5-phosphate		-0.0155103	-0.0155103	-0.0155103	-0.0158886	-0.0156049	0.000163809	-0.0158886	-0.0158886	-0.0155103	-0.0158886	-0.0157941	0.000163809	-0.0155103	-0.0158886	-0.0156995	0.00018915	-0.0158886	-0.0155103	-0.0156995	0.00018915	-0.0155103	-0.0155103	-0.0155103	-0.0155103	5.35925e-14	-0.0158886	-0.0158886	-0.0158886	-0.0162669	-0.0159832	0.000163809	-0.0158886	-0.0158886	-0.0158886	0	-0.00756602	-0.0074147
rxn05602_c0	L-lactate reversible transport via proton symport c0	S_cpd00067[e] + S_cpd00159[e] <=> S_cpd00067[c] + S_cpd00159[c]	(CAETHG_RS01180)	CAETHG_RS01180		Lactate utilisation	1	-1000	1000		H+ + L-Lactate <=> H+ + L-Lactate		0	0	0	0	0	0	0	0	0	0	0	0	-0.182099	-0.17012	-0.176109	0.00598945	-0.149553	-0.149232	-0.149393	0.000160554	0	-0.146165	-0.0454182	-0.0638612	0.0610802	0	-0.079141	-0.204591	-0.145714	-0.107361	0.0762354	-1.25056e-12	-0.0137576	-0.00687881	0.00687881	0	0
cpd00159_ext_b		S_cpd00159[e] <=>				Exchange Reactions	1	0	1000		L-Lactate <=>		0	0	0	0	0	0	0	0	0	0	0	0	0.182099	0.17012	0.176109	0.00598945	0.149553	0.149232	0.149393	0.000160554	0	0.146165	0.0454182	0.0638612	0.0610802	0	0.079141	0.204591	0.145714	0.107361	0.0762354	1.30082e-12	0.0137576	0.00687881	0.00687881	0	0
rxn01366_c0	Uridine:orthophosphate ribosyltransferase c0	S_cpd00009[c] + S_cpd00067[c] + S_cpd00249[c] <=> S_cpd00092[c] + S_cpd00475[c]	(CAETHG_RS19255)	CAETHG_RS19255		Pyrimidine conversions	1	-1000	1000	2.4.2.2,2.4.2.3	Phosphate + H+ + Uridine <=> Uracil + Ribose 1-phosphate		0	0	0	0	0	0	0	0	0	0	0	0	0	0	0	0	0	0	0	0	0	0	0	0	0	0	0	0	0	0	0	0	0	0	0	0	0
rxn01466_c0	Geranyl-diphosphate:isopentenyl-diphosphate geranyltrans-transferase c0	S_cpd00113[c] + S_cpd00283[c] -> S_cpd00012[c] + S_cpd00350[c]	((CAETHG_RS09090) and (CAETHG_RS09090) and (CAETHG_RS09090) and ((CAETHG_RS15735) or (CAETHG_RS09090)))	CAETHG_RS09090 CAETHG_RS15735		Archaeal lipids	0	0	1000	2.5.1.1,2.5.1.10,2.5.1.29	Isopentenyldiphosphate + Geranyldiphosphate -> PPi + Farnesyldiphosphate		0	0	0	0	0	0	0	0	0	0	0	0	0	0	0	0	0	0	0	0	0	0	0	0	0	0	0	0	0	0	0	0	0	0	0	0	0
rxn00499_c0	(S)-Lactate:NAD+ oxidoreductase c0	S_cpd00003[c] + S_cpd00159[c] <=> S_cpd00004[c] + S_cpd00020[c] + S_cpd00067[c]	(CAETHG_RS05500)	CAETHG_RS05500		Lactate Pathway	1	-1000	1000	1.1.1.27	NAD + L-Lactate <=> NADH + Pyruvate + H+		0	0	0	0	0	0	0	0	0	0	0	0	-0.182099	-0.17012	-0.176109	0.00598945	-0.149553	-0.149232	-0.149393	0.000160554	0	-0.146165	-0.0454182	-0.0638612	0.0610802	0	-0.079141	-0.204591	-0.145714	-0.107361	0.0762354	-1.25056e-12	-0.0137576	-0.00687881	0.00687881	0	0
rxn01106_c0	2-Phospho-D-glycerate 2,3-phosphomutase c0	S_cpd00482[c] <=> S_cpd00169[c]	(CAETHG_RS08500)	CAETHG_RS08500		Glycolysis/Gluconeogenesis	1	-1000	1000	5.4.2.12	2-Phospho-D-glycerate <=> 3-Phosphoglycerate		0.115792	0.115792	0.115792	0.118616	0.116498	0.00122291	0.118616	0.118616	0.115792	0.118616	0.11791	0.00122291	0.115792	0.118616	0.117204	0.00141209	0.118616	0.115792	0.117204	0.00141209	0.115792	0.115792	0.115792	0.115792	1.60777e-13	0.118616	0.118616	0.118616	0.12144	0.119322	0.00122291	0.118616	0.118616	0.118616	5.68434e-14	0.0564838	0.0553541
rxn02527_c0	rxn02527 c0	S_cpd00004[c] + S_cpd00067[c] + S_cpd01011[c] <=> S_cpd00003[c] + S_cpd03662[c]	((CAETHG_RS01950) and ())	CAETHG_RS01950		Butanol biosynthesis	1	-1000	1000	1.1.1.2	NADH + H+ + Butanal <=> NAD + n-Butanol		0	0	0	0	0	0	0	0	0	0	0	0	0	0	0	0	0	0	0	0	0	0	0	0	0	0	0	0	0	0	0	0	0	0	0	0	0
rxn00784_c0	2-Deoxy-D-ribose-5-phosphate acetaldehyde-lyase c0	S_cpd00510[c] <=> S_cpd00071[c] + S_cpd00102[c]	(CAETHG_RS19240)	CAETHG_RS19240		Pentose Phosphate Pathway	1	-1000	1000	4.1.2.4	deoxyribose-5-phosphate <=> Acetaldehyde + Glyceraldehyde3-phosphate		1.42065e-06	1.42065e-06	1.42065e-06	1.4553e-06	1.42931e-06	1.50039e-08	1.4553e-06	1.4553e-06	1.42065e-06	1.4553e-06	1.44664e-06	1.50039e-08	1.42065e-06	1.4553e-06	1.43798e-06	1.7325e-08	1.4553e-06	1.42065e-06	1.43798e-06	1.7325e-08	1.42065e-06	1.42065e-06	1.42065e-06	1.42065e-06	0	1.4553e-06	1.4553e-06	1.4553e-06	1.48995e-06	1.46396e-06	1.50039e-08	1.4553e-06	1.4553e-06	1.4553e-06	0	6.93e-07	6.7914e-07
rxn02804_c0	myristoyl-CoA:acetylCoA C-myristoyltransferase c0	S_cpd00022[c] + S_cpd01695[c] <=> S_cpd00010[c] + S_cpd03114[c]	(CAETHG_RS02035)	CAETHG_RS02035		Isobutyryl-CoA to Propionyl-CoA Module|Isoleucine degradation|Branched chain amino acid degradation regulons	1	-1000	1000	2.3.1.16,2.3.1.155	Acetyl-CoA + Myristoyl-CoA <=> CoA + 3-Oxopalmitoyl-CoA		0	0	0	0	0	0	0	0	0	0	0	0	0	0	0	0	0	0	0	0	0	0	0	0	0	0	0	0	0	0	0	0	0	0	0	0	0
rxn00293_c0	UTP:N-acetyl-alpha-D-glucosamine-1-phosphate uridylyltransferase c0	S_cpd00062[c] + S_cpd02611[c] <=> S_cpd00012[c] + S_cpd00037[c]	((CAETHG_RS09810) and (CAETHG_RS09810))	CAETHG_RS09810		UDP-N-acetylmuramate biosynthesis	1	-1000	1000	2.7.7.23	UTP + N-Acetyl-D-glucosamine1-phosphate <=> PPi + UDP-N-acetylglucosamine		0.00974325	0.00974325	0.00974325	0.00998089	0.00980266	0.000102901	0.00998089	0.00998089	0.00974325	0.00998089	0.00992148	0.000102901	0.00974325	0.00998089	0.00986207	0.00011882	0.00998089	0.00974325	0.00986207	0.00011882	0.00974325	0.00974325	0.00974325	0.00974325	0	0.00998089	0.00998089	0.00998089	0.0102185	0.0100403	0.000102901	0.00998089	0.00998089	0.00998089	0	0.0047528	0.00465775
rxn05542_c0	Dipeptide transport via ABC system (ala-gly) c0	S_cpd00001[c] + S_cpd00002[c] + S_cpd11585[e] -> S_cpd00008[c] + S_cpd00009[c] + S_cpd00067[c] + S_cpd11585[c]	(CAETHG_RS07520)	CAETHG_RS07520		ABC transporter dipeptide (TC 3.A.1.5.2)	0	0	1000		H2O + ATP + L-alanylglycine -> ADP + Phosphate + H+ + L-alanylglycine		0	0	0	0	0	0	0	0	0	0	0	0	0	0	0	0	0	0	0	0	0	0	0	0	0	0	0	0	0	0	0	0	0	0	0	0	0
rxn03538_c0	Adenosylcobalamin 5'-phosphate synthase c0	S_cpd03423[c] + S_cpd03920[c] <=> S_cpd00126[c] + S_cpd00166[c]	(CAETHG_RS07030)	CAETHG_RS07030		Cobalamin synthesis|Experimental tye|Coenzyme B12 biosynthesis|Heme and Siroheme Biosynthesis	1	-1000	1000	2.7.8.26	alpha-Ribazole + Adenosylcobinamide-GDP <=> GMP + Calomide		0	0	0	0	0	0	0	0	0	0	0	0	0	0	0	0	0	0	0	0	0	0	0	0	0	0	0	0	0	0	0	0	0	0	0	0	0
rxn05620_c0	MOPS transport via ABC system c0	S_cpd00001[c] + S_cpd00002[c] + S_cpd11575[e] -> S_cpd00008[c] + S_cpd00009[c] + S_cpd00067[c] + S_cpd11575[c]	(() and ((CAETHG_RS03470) or (CAETHG_RS19320)) and ((CAETHG_RS03465) or (CAETHG_RS19325)))	CAETHG_RS03465 CAETHG_RS03470 CAETHG_RS19320 CAETHG_RS19325		Alkanesulfonate assimilation|Alkanesulfonates utilisation	0	0	1000		H2O + ATP + MOPS -> ADP + Phosphate + H+ + MOPS		0	0	0	0	0	0	0	0	0	0	0	0	0	0	0	0	0	0	0	0	0	0	0	0	0	0	0	0	0	0	0	0	0	0	0	0	0
rxn00974_c0	citrate hydro-lyase c0	S_cpd00137[c] <=> S_cpd00001[c] + S_cpd00331[c]	(() and ((CAETHG_RS05015) or (CAETHG_RS13540)))	CAETHG_RS05015 CAETHG_RS13540		Citric Acid Cycle	1	-1000	1000	4.2.1.3	Citrate <=> H2O + cis-Aconitate		0.0310225	0.0310225	0.0310225	0.0317791	0.0312116	0.000327637	0.0317791	0.0317791	0.0310225	0.0317791	0.0315899	0.000327637	0.0310225	0.0317791	0.0314008	0.000378323	0.0317791	0.0310225	0.0314008	0.000378323	0.0310225	0.0310225	0.0310225	0.0310225	0	0.0317791	0.0317791	0.0317791	0.0325358	0.0319683	0.000327637	0.0317791	0.0317791	0.0317791	0	0.0151329	0.0148303
rxn05485_c0	N-Acetyl-D-glucosamine transport via PEP:Pyr PTS c0	S_cpd00061[c] + S_cpd00122[e] <=> S_cpd00020[c] + S_cpd00293[c]	(() and () and (CAETHG_RS09185) and ())	CAETHG_RS09185		Chitin and N-acetylglucosamine utilisation|Sialic Acid Metabolism	1	-1000	1000		Phosphoenolpyruvate + N-Acetyl-D-glucosamine <=> Pyruvate + N-Acetyl-D-glucosamine 6-phosphate		0	0	0	0	0	0	0	0	0	0	0	0	0	0	0	0	0	0	0	0	0	0	0	0	0	0	0	0	0	0	0	0	0	0	0	0	0
rxn01646_c0	N-Ribosylnicotinamide:orthophosphate ribosyltransferase c0	S_cpd00009[c] + S_cpd02016[c] <=> S_cpd00133[c] + S_cpd00475[c]	(CAETHG_RS00760)	CAETHG_RS00760		Purine conversions / Pyrimdine conversions	1	-1000	1000	2.4.2.1	Phosphate + N-Ribosylnicotinamide <=> Nicotinamide + Ribose 1-phosphate		0	0	0	0	0	0	0	0	0	0	0	0	0	0	0	0	0	0	0	0	0	0	0	0	0	0	0	0	0	0	0	0	0	0	0	0	0
rxn09685_c0	deoxyuridine transport in via proton symport c0	S_cpd00067[e] + S_cpd00412[e] <=> S_cpd00067[c] + S_cpd00412[c]	(CAETHG_RS19245)	CAETHG_RS19245		Deoxyribose and Deoxynucleoside Catabolism	1	-1000	1000		H+ + Deoxyuridine <=> H+ + Deoxyuridine		0	0	0	0	0	0	0	0	0	0	0	0	0	0	0	0	0	0	0	0	0	0	0	0	0	0	0	0	0	0	0	0	0	0	0	0	0
rxn05162_c0	D-Galactose ABC transport c0	S_cpd00001[c] + S_cpd00002[c] + S_cpd00108[e] -> S_cpd00008[c] + S_cpd00009[c] + S_cpd00067[c] + S_cpd00108[c]	(() and () and (CAETHG_RS14695))	CAETHG_RS14695		Lactose and Galactose Uptake and utilisation	0	0	1000		H2O + ATP + Galactose -> ADP + Phosphate + H+ + Galactose		0	0	0	0	0	0	0	0	0	0	0	0	0	0	0	0	0	0	0	0	0	0	0	0	0	0	0	0	0	0	0	0	0	0	0	0	0
rxn03004_c0	10-Formyltetrahydrofolate:5'-phosphoribosylglycinamide c0	S_cpd00201[c] + S_cpd02394[c] <=> S_cpd00067[c] + S_cpd00087[c] + S_cpd02678[c]	(CAETHG_RS14510)	CAETHG_RS14510		De Novo Purine Biosynthesis|Glutathione-regulated potassium-efflux system and associated functions	1	-1000	1000	2.1.2.2	10-Formyltetrahydrofolate + GAR <=> H+ + Tetrahydrofolate + N-Formyl-GAR		0.00878687	0.00878687	0.00878687	0.00900118	0.00884045	9.28006e-05	0.00900118	0.00900118	0.00878687	0.00900118	0.0089476	9.28006e-05	0.00878687	0.00900118	0.00889402	0.000107157	0.00900118	0.00878687	0.00889402	0.000107157	0.00878687	0.00878687	0.00878687	0.00878687	5.35925e-14	0.00900118	0.00900118	0.00900118	0.0092155	0.00905476	9.28006e-05	0.00900118	0.00900118	0.00900118	0	0.00428628	0.00420055
rxn00202_c0	2-Hydroxybutane-1,2,4-tricarboxylate 2-oxoglutarate-lyase c0	S_cpd00001[c] + S_cpd00022[c] + S_cpd00024[c] -> S_cpd00010[c] + S_cpd00067[c] + S_cpd00919[c]	(CAETHG_RS12680)	CAETHG_RS12680		Lysine biosynthesis AAA pathway 2	0	0	1000	2.3.3.14,4.1.3.21	H2O + Acetyl-CoA + 2-Oxoglutarate -> CoA + H+ + Homocitrate		0	0	0	0	0	0	0	0	0	0	0	0	0	0	0	0	0	0	0	0	0	0	0	0	0	0	0	0	0	0	0	0	0	0	0	0	0
rxn10147_c0	Cob(1)alamin transport via ABC system c0	S_cpd00001[c] + S_cpd00002[c] + S_cpd00635[e] -> S_cpd00008[c] + S_cpd00009[c] + S_cpd00067[c] + S_cpd00635[c]	(() and (CAETHG_RS13145) and (CAETHG_RS13140) and (CAETHG_RS13135))	CAETHG_RS13135 CAETHG_RS13140 CAETHG_RS13145		Coenzyme B12 biosynthesis	0	0	1000		H2O + ATP + Cbl -> ADP + Phosphate + H+ + Cbl		0	0	0	0	0	0	0	0	0	0	0	0	0	0	0	0	0	0	0	0	0	0	0	0	0	0	0	0	0	0	0	0	0	0	0	0	0
rxn09657_c0	Thiamine transport in via proton symport c0	S_cpd00067[e] + S_cpd00305[e] -> S_cpd00067[c] + S_cpd00305[c]	((CAETHG_RS19875) or (CAETHG_RS17850))	CAETHG_RS17850 CAETHG_RS19875		Purine utilisation|Hydantoin metabolism	0	0	1000		H+ + Thiamin -> H+ + Thiamin		0	0	0	0	0	0	0	0	0	0	0	0	0	0	0	0	0	0	0	0	0	0	0	0	0	0	0	0	0	0	0	0	0	0	0	0	0
rxn12638_c0	aminopeptidase c0	S_cpd00001[c] + S_cpd11588[c] -> S_cpd00033[c] + S_cpd00067[c] + S_cpd00129[c]	(((CAETHG_RS04585) or (CAETHG_RS15660)) or (CAETHG_RS03545) or (CAETHG_RS07155))	CAETHG_RS03545 CAETHG_RS04585 CAETHG_RS07155 CAETHG_RS15660		Recycling of Peptidoglycan Amino Acids|Protein degradation	0	0	1000		H2O + gly-pro-L -> Glycine + H+ + L-Proline		0	0	0	0	0	0	0	0	0	0	0	0	0	0	0	0	0	0	0	0	0	0	0	0	0	0	0	0	0	0	0	0	0	0	0	0	0
rxn12643_c0	aminopeptidase c0	S_cpd00001[c] + S_cpd11583[c] -> S_cpd00035[c] + S_cpd00107[c]	(((CAETHG_RS04585) or (CAETHG_RS15660)) or (CAETHG_RS03545) or (CAETHG_RS07155))	CAETHG_RS03545 CAETHG_RS04585 CAETHG_RS07155 CAETHG_RS15660		Recycling of Peptidoglycan Amino Acids|Protein degradation	0	0	1000		H2O + Ala-Leu -> L-Alanine + L-Leucine		0	0	0	0	0	0	0	0	0	0	0	0	0	0	0	0	0	0	0	0	0	0	0	0	0	0	0	0	0	0	0	0	0	0	0	0	0
rxn10207_c0	isotetradecanoyl-glycerol-3-phosphate O-acyltransferase c0	S_cpd00080[c] + S_cpd11435[c] -> S_cpd00010[c] + S_cpd15673[c]	(() and (CAETHG_RS16510))	CAETHG_RS16510		Glycerolipid and Glycerophospholipid Metabolism in Bacteria	0	0	1000	2.3.1.15	Glycerol-3-phosphate + fa1coa -> CoA + 1-isotetradecanoyl-sn-glycerol 3-phosphate		0	0	0	0	0	0	0	0	0	0	0	0	0	0	0	0	0	0	0	0	0	0	0	0	0	0	0	0	0	0	0	0	0	0	0	0	0
rxn05663_c0	L-tryptophan transport in via proton symport c0	S_cpd00065[e] + S_cpd00067[e] <=> S_cpd00065[c] + S_cpd00067[c]	(CAETHG_RS04260)	CAETHG_RS04260		Transport Reactions	1	-1000	1000	proton	L-Tryptophan + H+ <=> L-Tryptophan + H+		0	0	0	0	0	0	0	0	0	0	0	0	0	0	0	0	0	0	0	0	0	0	0	0	0	0	0	0	0	0	0	0	0	0	0	0	0
rxn02264_c0	Hydroxymethylbilane hydro-lyase(cyclizing) c0	S_cpd00755[c] <=> S_cpd00001[c] + S_cpd00774[c]	(CAETHG_RS05390)	CAETHG_RS05390		Experimental tye|Heme and Siroheme Biosynthesis	1	-1000	1000	4.2.1.75	Hydroxymethylbilane <=> H2O + UroporphyrinogenIII		0	0	0	0	0	0	0	0	0	0	0	0	0	0	0	0	0	0	0	0	0	0	0	0	0	0	0	0	0	0	0	0	0	0	0	0	0
rxn01225_c0	Guanine aminohydrolase c0	S_cpd00001[c] + S_cpd00067[c] + S_cpd00207[c] -> S_cpd00013[c] + S_cpd00309[c]	((CAETHG_RS04995) or (CAETHG_RS05050) or (CAETHG_RS02200))	CAETHG_RS02200 CAETHG_RS04995 CAETHG_RS05050		Purine utilisation|Purine conversions	0	0	1000	3.5.4.3	H2O + H+ + Guanine -> NH3 + XAN		0	0	0	0	0	0	0	0	0	0	0	0	0	0	0	0	0	0	0	0	0	0	0	0	0	0	0	0	0	0	0	0	0	0	0	0	0
rxn03903_c0	UDPMurAc(oyl-L-Ala-D-gamma-Glu-L-Lys-D-Ala-D-Ala):undecaprenyl- c0	S_cpd00286[c] + S_cpd02862[c] <=> S_cpd00091[c] + S_cpd02948[c]	(CAETHG_RS15470)	CAETHG_RS15470		Peptidoglycan Biosynthesis|Peptidoglycan Biosynthesis 2	1	-1000	1000	2.7.8.13	Undecaprenylphosphate + UDPMurAc(oyl-L-Ala-D-gamma-Glu-L-Lys-D-Ala-D-Ala) <=> UMP + MurAc(oyl-L-Ala-D-gamma-Glu-L-Lys-D-Ala-D-Ala)-diphospho- undecaprenol		0	0	0	0	0	0	0	0	0	0	0	0	0	0	0	0	0	0	0	0	0	0	0	0	0	0	0	0	0	0	0	0	0	0	0	0	0
rxn00985_c0	ATP:acetate phosphotransferase c0	S_cpd00002[c] + S_cpd00067[c] + S_cpd00141[c] <=> S_cpd00008[c] + S_cpd01844[c]	(CAETHG_RS16495)	CAETHG_RS16495		Propanediol utilisation	1	-1000	1000	2.7.2.1,2.7.2.15	ATP + H+ + Propionate <=> ADP + Propionyl phosphate		0	0	0	0	0	0	0	0	0	0	0	0	0	0	0	0	0	0	0	0	0	0	0	0	0	0	0	0	0	0	0	0	0	0	0	0	0
rxn00151_c0	ATP:pyruvate,orthophosphate phosphotransferase c0	S_cpd00002[c] + S_cpd00009[c] + S_cpd00020[c] + S_cpd00067[c] -> S_cpd00012[c] + S_cpd00018[c] + S_cpd00061[c]	(CAETHG_RS14295)	CAETHG_RS14295		Glycolysis and Gluconeogenesis, including Archaeal enzymes|Pyruvate metabolism I: anaplerotic reactions, PEP|Glycolysis and Gluconeogenesis	0	0	1000	2.7.9.1	ATP + Phosphate + Pyruvate + H+ -> PPi + AMP + Phosphoenolpyruvate		0	0	0	0	0	0	0	0	0	0	0	0	0	0	0	0	0	0	0	0	0	0	0	0	0	0	0	0	0	0	0	0	0	0	0	0	0
rxn00440_c0	ATP:thiamin pyrophosphotransferase c0	S_cpd00002[c] + S_cpd00305[c] <=> S_cpd00018[c] + S_cpd00056[c]	(CAETHG_RS16440)	CAETHG_RS16440		Thiamin biosynthesis|PnuC-like transporters	1	-1000	1000	2.7.6.2	ATP + Thiamin <=> AMP + TPP		0	0	0	0	0	0	0	0	0	0	0	0	0	0	0	0	0	0	0	0	0	0	0	0	0	0	0	0	0	0	0	0	0	0	0	0	0
rxn05627_c0	nitrate transport in via proton symport c0	S_cpd00067[e] + S_cpd00209[e] <=> S_cpd00067[c] + S_cpd00209[c]	(CAETHG_RS17575)	CAETHG_RS17575		Nitrate and nitrite ammonification	1	-1000	1000		H+ + Nitrate <=> H+ + Nitrate		0	0	0	0	0	0	0	0	0	0	0	0	0	0	0	0	0	0	0	0	0	0	0	0	0	0	0	0	0	0	0	0	0	0	0	0	0
rxn08352_c0	1-hydroxy-2-methyl-2-(E)-butenyl 4-diphosphate reductase (dmpp) c0	S_cpd00004[c] + S_cpd00067[c] + S_cpd08615[c] -> S_cpd00001[c] + S_cpd00003[c] + S_cpd00202[c]	(CAETHG_RS01035)	CAETHG_RS01035		Methylerythritol Phosphate Pathway	0	0	1000	1.17.1.2	NADH + H+ + 1-Hydroxy-2-methyl-2-butenyl 4-diphosphate -> H2O + NAD + DMAPP		0	0	0	0	0	0	0	0	0	0	0	0	0	0	0	0	0	0	0	0	0	0	0	0	0	0	0	0	0	0	0	0	0	0	0	0	0
rxn05209_c0	Proton sodium antiport c0	S_cpd00067[c] + S_cpd00971[e] <=> S_cpd00067[e] + S_cpd00971[c]	((((CAETHG_RS09110) or (CAETHG_RS14665)) and (CAETHG_RS14705)) or (CAETHG_RS04545) or (CAETHG_RS14705))	CAETHG_RS04545 CAETHG_RS09110 CAETHG_RS14665 CAETHG_RS14705		Sodium Hydrogen Antiporter	1	-1000	1000		H+ + Na+ <=> H+ + Na+		0	0	0	0	0	0	0	0	0	0	0	0	0	0	0	0	0	0	0	0	0	0	0	0	0	0	0	0	0	0	0	0	0	0	0	0	0
rxn08306_c0	CDP-diacylglycerol synthetase (n-C12:0) c0	S_cpd00052[c] + S_cpd15521[c] <=> S_cpd00012[c] + S_cpd15417[c]	(CAETHG_RS16645)	CAETHG_RS16645		Glycerolipid and Glycerophospholipid Metabolism in Bacteria	1	-1000	1000	2.7.7.41	CTP + 1,2-didodecanoyl-sn-glycerol 3-phosphate <=> PPi + CDP-1,2-didodecanoylglycerol		0	0	0	0	0	0	0	0	0	0	0	0	0	0	0	0	0	0	0	0	0	0	0	0	0	0	0	0	0	0	0	0	0	0	0	0	0
rxn00709_c0	ATP:uridine 5'-phosphotransferase c0	S_cpd00002[c] + S_cpd00249[c] -> S_cpd00008[c] + S_cpd00091[c]	(CAETHG_RS11755)	CAETHG_RS11755		Pyrimidine conversions	0	0	1000	2.7.1.48	ATP + Uridine -> ADP + UMP		0	0	0	0	0	0	0	0	0	0	0	0	0	0	0	0	0	0	0	0	0	0	0	0	0	0	0	0	0	0	0	0	0	0	0	0	0
rxn05535_c0	Dipeptide transport via ABC system (gly-met) c0	S_cpd00001[c] + S_cpd00002[c] + S_cpd11591[e] -> S_cpd00008[c] + S_cpd00009[c] + S_cpd00067[c] + S_cpd11591[c]	(CAETHG_RS07520)	CAETHG_RS07520		ABC transporter dipeptide (TC 3.A.1.5.2)	0	0	1000		H2O + ATP + Gly-Met -> ADP + Phosphate + H+ + Gly-Met		0	0	0	0	0	0	0	0	0	0	0	0	0	0	0	0	0	0	0	0	0	0	0	0	0	0	0	0	0	0	0	0	0	0	0	0	0
rxn05360_c0	4-methyl-3-oxo-hexanoyl-ACP:NADP+ oxidoreductase c0	S_cpd00005[c] + S_cpd00067[c] + S_cpd11496[c] <=> S_cpd00006[c] + S_cpd11497[c]	((CAETHG_RS08435) or (CAETHG_RS00375) or (CAETHG_RS00860) or (CAETHG_RS04365) or (CAETHG_RS06705) or (CAETHG_RS03500) or (CAETHG_RS04680) or (CAETHG_RS09990))	CAETHG_RS00375 CAETHG_RS00860 CAETHG_RS03500 CAETHG_RS04365 CAETHG_RS04680 CAETHG_RS06705 CAETHG_RS08435 CAETHG_RS09990		mycolic acid synthesis|Fatty Acid Biosynthesis FASII	1	-1000	1000	1.1.1.0	NADPH + H+ + 4-methyl-3-oxo-hexanoyl-ACP <=> NADP + 4-methyl-3-hydroxy-hexanoyl-ACP		0	0	0	0	0	0	0	0	0	0	0	0	0	0	0	0	0	0	0	0	0	0	0	0	0	0	0	0	0	0	0	0	0	0	0	0	0
rxn00214_c0	UDPglucose 4-epimerase c0	S_cpd00026[c] <=> S_cpd00043[c]	((CAETHG_RS01225) or (CAETHG_RS15175))	CAETHG_RS01225 CAETHG_RS15175		N-linked Glycosylation in Bacteria|Lactose and Galactose Uptake and utilisation|Lacto-N-Biose I and Galacto-N-Biose Metabolic Pathway|Rhamnose containing glycans|linker unit-arabinogalactan synthesis	1	-1000	1000	5.1.3.2	UDP-glucose <=> UDP-galactose		0.00728672	0.00728672	0.00728672	0.00746444	0.00733115	7.69571e-05	0.00746444	0.00746444	0.00728672	0.00746444	0.00742001	7.69571e-05	0.00728672	0.00746444	0.00737558	8.88624e-05	0.00746444	0.00728672	0.00737558	8.88624e-05	0.00728672	0.00728672	0.00728672	0.00728672	0	0.00746444	0.00746444	0.00746444	0.00764217	0.00750887	7.69571e-05	0.00746444	0.00746444	0.00746444	0	0.0035545	0.00348341
rxn00874_c0	Acetyl-CoA:acetyl-CoA C-acetyltransferase c0	S_cpd00022[c] + S_cpd00120[c] <=> S_cpd00010[c] + S_cpd03123[c]	(CAETHG_RS02035)	CAETHG_RS02035		Isobutyryl-CoA to Propionyl-CoA Module|Isoleucine degradation|Branched chain amino acid degradation regulons	1	-1000	1000	2.3.1.9,2.3.1.16	Acetyl-CoA + Butyryl-CoA <=> CoA + 3-Oxohexanoyl-CoA		0	0	0	0	0	0	0	0	0	0	0	0	0	0	0	0	0	0	0	0	0	0	0	0	0	0	0	0	0	0	0	0	0	0	0	0	0
rxn05197_c0	Uracil ion-coupled transport c0	S_cpd00067[e] + S_cpd00092[e] <=> S_cpd00067[c] + S_cpd00092[c]	(((CAETHG_RS02010) or (CAETHG_RS15540)) or ((CAETHG_RS19875) or (CAETHG_RS17850)))	CAETHG_RS02010 CAETHG_RS15540 CAETHG_RS17850 CAETHG_RS19875		Transport Reactions	1	-1000	1000		H+ + Uracil <=> H+ + Uracil		0	0	0	0	0	0	0	0	0	0	0	0	0	0	0	0	0	0	0	0	0	0	0	0	0	0	0	0	0	0	0	0	0	0	0	0	0
rxn06600_c0	S-aminomethyldihydrolipoylprotein:(6S)-tetrahydrofolate c0	S_cpd00087[c] + S_cpd11830[c] -> S_cpd00013[c] + S_cpd00125[c] + S_cpd12225[c]	(((CAETHG_RS02265) or (CAETHG_RS18030) or (CAETHG_RS07795)) and (CAETHG_RS02270))	CAETHG_RS02265 CAETHG_RS02270 CAETHG_RS07795 CAETHG_RS18030		Glycine cleage system	0	0	1000	2.1.2.10	Tetrahydrofolate + S-Aminomethyldihydrolipoylprotein -> NH3 + 5-10-Methylenetetrahydrofolate + Dihydrolipolprotein		0	0	0	0	0	0	0	0	0	0	0	0	0	0	0	0	0	0	0	0	0	0	0	0	0	0	0	0	0	0	0	0	0	0	0	0	0
rxn08085_c0	1-tetradec-7-enoyl-sn-glycerol 3-phosphate O-acyltransferase (n-C14:1) c0	S_cpd15294[c] + S_cpd15330[c] -> S_cpd11493[c] + S_cpd15523[c]	((CAETHG_RS13530) or (CAETHG_RS08580))	CAETHG_RS08580 CAETHG_RS13530		Phosphate metabolism|Glycerolipid and Glycerophospholipid Metabolism in Bacteria	0	0	1000	2.3.1.51	Tetradecenoyl-ACP + 1-tetradec-7-enoyl-sn-glycerol 3-phosphate -> ACP + 1,2-ditetradec-7-enoyl-sn-glycerol 3-phosphate		0	0	0	0	0	0	0	0	0	0	0	0	0	0	0	0	0	0	0	0	0	0	0	0	0	0	0	0	0	0	0	0	0	0	0	0	0
rxn09109_c0	Phosphatidylglycerol synthase (n-C14:0) c0	S_cpd00080[c] + S_cpd15423[c] <=> S_cpd00046[c] + S_cpd15543[c]	((CAETHG_RS16745) or (CAETHG_RS06675))	CAETHG_RS06675 CAETHG_RS16745		Glycerolipid and Glycerophospholipid Metabolism in Bacteria	1	-1000	1000	2.7.8.5	Glycerol-3-phosphate + CDP-1,2-ditetradecanoylglycerol <=> CMP + Phosphatidylglycerophosphate ditetradecanoyl		0	0	0	0	0	0	0	0	0	0	0	0	0	0	0	0	0	0	0	0	0	0	0	0	0	0	0	0	0	0	0	0	0	0	0	0	0
rxn01352_c0	dGTP triphosphohydrolase c0	S_cpd00001[c] + S_cpd00241[c] -> S_cpd00067[c] + S_cpd00277[c] + S_cpd00421[c]	(CAETHG_RS12185)	CAETHG_RS12185		Purine conversions	0	0	1000	3.1.5.1	H2O + dGTP -> H+ + Deoxyguanosine + Triphosphate		0	0	0	0	0	0	0	0	0	0	0	0	0	0	0	0	0	0	0	0	0	0	0	0	0	0	0	0	0	0	0	0	0	0	0	0	0
rxn10258_c0	isohexadecanoyl-Diacylglycerol kinase c0	S_cpd00002[c] + S_cpd15706[c] <=> S_cpd00008[c] + S_cpd15682[c]	(CAETHG_RS14270)	CAETHG_RS14270		Glycerolipid and Glycerophospholipid Metabolism in Bacteria	1	-1000	1000	2.7.1.107	ATP + 1,2-Diisohexadecanoyl-sn-glycerol <=> ADP + 1,2-diisohexadecanoyl-sn-glycerol 3-phosphate		0	0	0	0	0	0	0	0	0	0	0	0	0	0	0	0	0	0	0	0	0	0	0	0	0	0	0	0	0	0	0	0	0	0	0	0	0
rxn05289_c0	TRDR c0	S_cpd00005[c] + S_cpd00067[c] + S_cpd11420[c] <=> S_cpd00006[c] + S_cpd11421[c]	(CAETHG_RS09165)	CAETHG_RS09165		Thioredoxin disulfide reductase	1	-1000	1000	1.8.1.9	NADPH + H+ + trdox <=> NADP + trdrd		0.669884	0.623049	0.826764	0.609147	0.682211	0.086438	0.370687	0.458037	0.415379	0.441522	0.421406	0.032997	0.00345952	0.0035439	0.00350171	4.21893e-05	0.0035439	0.00345952	0.00350171	4.21893e-05	0.00725408	0.00345952	0.00345952	0.00472438	0.00178877	0.00592162	0.0035439	0.0035439	0.00362828	0.00415943	0.00101798	0.0547166	0.0035439	0.0291303	0.0255864	0.0402508	0.0734478
rxn02000_c0	dTDP-4-dehydro-6-deoxy-D-glucose 3,5-epimerase c0	S_cpd00521[c] <=> S_cpd00522[c]	((CAETHG_RS12980) or (CAETHG_RS12880))	CAETHG_RS12880 CAETHG_RS12980		dTDP-L-rhamnoase synthesis	1	-1000	1000	5.1.3.13	dTDP-4-oxo-6-deoxy-D-glucose <=> dTDP-4-oxo-L-rhamnose		0	0	0	0	0	0	0	0	0	0	0	0	0	0	0	0	0	0	0	0	0	0	0	0	0	0	0	0	0	0	0	0	0	0	0	0	0
rxn10228_c0	isotetradecanoyl-CDPdiacylglycerol-serine O-phosphatidyltransferase c0	S_cpd00054[c] + S_cpd15685[c] -> S_cpd00046[c] + S_cpd00067[c] + S_cpd15691[c]	(CAETHG_RS11850)	CAETHG_RS11850		Glycerolipid and Glycerophospholipid Metabolism in Bacteria	0	0	1000	2.7.8.8	L-Serine + CDP-1,2-diisotetradecanoylglycerol -> CMP + H+ + Diisotetradecanoylphosphatidylserine		0	0	0	0	0	0	0	0	0	0	0	0	0	0	0	0	0	0	0	0	0	0	0	0	0	0	0	0	0	0	0	0	0	0	0	0	0
rxn01977_c0	alpha-D-Glucose 6-phosphate ketol-isomerase c0	S_cpd00079[c] <=> S_cpd00863[c]	(CAETHG_RS07610)	CAETHG_RS07610		Pentose Phosphate Pathway	1	-1000	1000	5.1.3.15	D-glucose-6-phosphate <=> beta-D-Glucose 6-phosphate		0	0	0	0	0	0	0	0	0	0	0	0	0	0	0	0	0	0	0	0	0	0	0	0	0	0	0	0	0	0	0	0	0	0	0	0	0
rxn00368_c0	UTP:cytidine 5'-phosphotransferase c0	S_cpd00062[c] + S_cpd00367[c] -> S_cpd00014[c] + S_cpd00046[c]	(CAETHG_RS11755)	CAETHG_RS11755		Pyrimidine conversions	0	0	1000	2.7.1.48	UTP + Cytidine -> UDP + CMP		0	0	0	0	0	0	0	0	0	0	0	0	0	0	0	0	0	0	0	0	0	0	0	0	0	0	0	0	0	0	0	0	0	0	0	0	0
rxn09448_c0	fatty-acid--CoA ligase (octadecenoate) c0	S_cpd00002[c] + S_cpd00010[c] + S_cpd00067[c] + S_cpd15269[c] -> S_cpd00012[c] + S_cpd00018[c] + S_cpd15274[c]	(CAETHG_RS08635)	CAETHG_RS08635		Fatty acid degradation regulons|Unsaturated Fatty Acid Metabolism|Carbonate Biomineralization|n-Phenylalkanoic acid degradation|Biotin biosynthesis	0	0	1000	6.2.1.3	ATP + CoA + H+ + octadecenoate -> PPi + AMP + Octadecenoyl-CoA		0	0	0	0	0	0	0	0	0	0	0	0	0	0	0	0	0	0	0	0	0	0	0	0	0	0	0	0	0	0	0	0	0	0	0	0	0
rxn03421_c0	GTP 7,8-8,9-dihydrolase c0	S_cpd03519[c] <=> S_cpd03666[c]	(CAETHG_RS13405)	CAETHG_RS13405		Pterin metabolism|Methanopterin biosynthesis2|tRNA modification Archaea Henri|Folate Biosynthesis|Queuosine-Archaeosine Biosynthesis|Folate Biosynthesis (Phoenix Copy)|Zinc regulated enzymes|Pterin metabolism 3	1	-1000	1000	3.5.4.16,6.-.-.-	2,5-Diaminopyrimidine nucleoside triphosphate <=> 2,5-Diamino-6-(5-triphosphoryl-3,4-trihydroxy-2-oxopentyl)- amino-4-oxopyrimidine		0	0	0	0	0	0	0	0	0	0	0	0	0	0	0	0	0	0	0	0	0	0	0	0	0	0	0	0	0	0	0	0	0	0	0	0	0
rxn00867_c0	L-Histidine ammonia-lyase c0	S_cpd00119[c] -> S_cpd00013[c] + S_cpd00581[c]	((CAETHG_RS01105) or (CAETHG_RS05665))	CAETHG_RS01105 CAETHG_RS05665		Histidine degradation	0	0	1000	4.3.1.3	L-Histidine -> NH3 + Urocanate		0	0	0	0	0	0	0	0	0	0	0	0	0	0	0	0	0	0	0	0	0	0	0	0	0	0	0	0	0	0	0	0	0	0	0	0	0
rxn12635_c0	aminopeptidase c0	S_cpd00001[c] + S_cpd11591[c] <=> S_cpd00033[c] + S_cpd00060[c]	(((CAETHG_RS04585) or (CAETHG_RS15660)) or (CAETHG_RS03545) or (CAETHG_RS07155))	CAETHG_RS03545 CAETHG_RS04585 CAETHG_RS07155 CAETHG_RS15660		Recycling of Peptidoglycan Amino Acids|Protein degradation	1	-1000	1000		H2O + Gly-Met <=> Glycine + L-Methionine		0	0	0	0	0	0	0	0	0	0	0	0	0	0	0	0	0	0	0	0	0	0	0	0	0	0	0	0	0	0	0	0	0	0	0	0	0
rxn00213_c0	UTP:alpha-D-glucose-1-phosphate uridylyltransferase c0	S_cpd00062[c] + S_cpd00089[c] <=> S_cpd00012[c] + S_cpd00026[c]	((CAETHG_RS06335) or (CAETHG_RS12420))	CAETHG_RS06335 CAETHG_RS12420		Streptococcal Hyaluronic Acid Capsule|Sucrose Metabolism	1	-1000	1000	2.7.7.9	UTP + Glucose-1-phosphate <=> PPi + UDP-glucose		0.0109301	0.0109301	0.0109301	0.0111967	0.0109967	0.000115436	0.0111967	0.0111967	0.0109301	0.0111967	0.01113	0.000115436	0.0109301	0.0111967	0.0110634	0.000133294	0.0111967	0.0109301	0.0110634	0.000133294	0.0109301	0.0109301	0.0109301	0.0109301	0	0.0111967	0.0111967	0.0111967	0.0114632	0.0112633	0.000115436	0.0111967	0.0111967	0.0111967	0	0.00533174	0.00522511
rxn05409_c0	2-methylpropionyl-ACP:malonyl-[acyl-carrier-protein] C-acyltransferase (decarboxylating) c0	S_cpd00067[c] + S_cpd11492[c] + S_cpd11545[c] -> S_cpd00011[c] + S_cpd11493[c] + S_cpd11546[c]	((CAETHG_RS10005) and (CAETHG_RS09985))	CAETHG_RS09985 CAETHG_RS10005		Fatty Acid Biosynthesis FASII	0	0	1000	2.3.1.0	H+ + Malonyl-acyl-carrierprotein + isobutyryl-ACP -> CO2 + ACP + 4-methyl-3-oxo-pentanoyl-ACP		0	0	0	0	0	0	0	0	0	0	0	0	0	0	0	0	0	0	0	0	0	0	0	0	0	0	0	0	0	0	0	0	0	0	0	0	0
rxn10314_c0	anteisopentadecanoyl-lipoteichoic acid synthesis (n-24), linked, N-acetylglucosamine substituted c0	24 S_cpd00037[c] + S_cpd15753[c] <=> 24 S_cpd00014[c] + S_cpd15771[c]	(CAETHG_RS11510)	CAETHG_RS11510		Teichoic and lipoteichoic acids biosynthesis|Methicillin resistance in Staphylococci|Teichuronic acid biosynthesis	1	-1000	1000	2.7.8.-	24 UDP-N-acetylglucosamine + Anteisopentadecanoyllipoteichoic acid (n-24), linked, unsubstituted <=> 24 UDP + Anteisopentadecanoyllipoteichoic acid (n-24), linked, N-acetyl-D-glucosamine		0	0	0	0	0	0	0	0	0	0	0	0	0	0	0	0	0	0	0	0	0	0	0	0	0	0	0	0	0	0	0	0	0	0	0	0	0
rxn10282_c0	stearoyl-UDP-glucosyltransferase (monoglucosyl) c0	S_cpd00026[c] + S_cpd15311[c] <=> S_cpd00014[c] + S_cpd15739[c]	(CAETHG_RS11420)	CAETHG_RS11420		Teichoic and lipoteichoic acids biosynthesis	1	-1000	1000		UDP-glucose + 1,2-Diacyl-sn-glycerol dioctadecanoyl <=> UDP + Monoglucosyl-1,2 distearoylglycerol		0	0	0	0	0	0	0	0	0	0	0	0	0	0	0	0	0	0	0	0	0	0	0	0	0	0	0	0	0	0	0	0	0	0	0	0	0
rxn00493_c0	L-Phenylalanine:2-oxoglutarate aminotransferase c0	S_cpd00024[c] + S_cpd00066[c] <=> S_cpd00023[c] + S_cpd00143[c]	((CAETHG_RS12490) or ((CAETHG_RS16020) and ()))	CAETHG_RS12490 CAETHG_RS16020		Phenylalanine and Tyrosine Synthesis	1	-1000	1000	2.6.1.57	2-Oxoglutarate + L-Phenylalanine <=> L-Glutamate + Phenylpyruvate		-0.00305613	-0.00305613	-0.00305613	-0.00313067	-0.00307477	3.22767e-05	-0.00313067	-0.00313067	-0.00305613	-0.00313067	-0.00311204	3.22767e-05	-0.00305613	-0.00313067	-0.0030934	3.72699e-05	-0.00313067	-0.00305613	-0.0030934	3.72699e-05	-0.00305613	-0.00305613	-0.00305613	-0.00305613	0	-0.00313067	-0.00313067	-0.00313067	-0.00320521	-0.00314931	3.22767e-05	-0.00313067	-0.00313067	-0.00313067	0	-0.0014908	-0.00146098
rxn00173_c0	Acetyl-CoA:orthophosphate acetyltransferase c0	S_cpd00009[c] + S_cpd00022[c] + S_cpd00067[c] <=> S_cpd00010[c] + S_cpd00196[c]	(CAETHG_RS16490)	CAETHG_RS16490		Acetate Fermentation	1	-1000	1000	2.3.1.8	Phosphate + Acetyl-CoA + H+ <=> CoA + Acetylphosphate		4.51957	4.44957	4.12957	4.58858	4.42182	0.175745	5.65858	5.73858	5.70957	5.45858	5.64133	0.109326	7.75957	7.27858	7.51907	0.240493	7.94858	7.64957	7.79907	0.149507	9.84957	9.82957	10.1796	9.9529	0.160485	9.65858	9.18858	10.4586	9.6876	9.74834	0.45539	20.8486	24.4386	22.6436	1.795	9.79028	10.3007
rxn08528_c0	fumarate reductase c0	S_cpd00106[c] + S_cpd15353[c] <=> S_cpd00036[c] + S_cpd15352[c]	(((CAETHG_RS01630) and (CAETHG_RS01620)) or (CAETHG_RS01620) or (() and () and () and () and () and ((CAETHG_RS14560) or (CAETHG_RS04915))))	CAETHG_RS01620 CAETHG_RS01630 CAETHG_RS04915 CAETHG_RS14560		YgfZ|TCA Cycle|Succinate dehydrogenase|Serine-glyoxylate cycle	1	-1000	1000	1.3.99.1	Fumarate + 2-Demethylmenaquinol 8 <=> Succinate + 2-Demethylmenaquinone 8		0	0	0	0	0	0	0	0	0	0	0	0	0	0	0	0	0	0	0	0	0	0	0	0	0	0	0	0	0	0	0	0	0	0	0	0	0
rxn01509_c0	ATP:(d)GMP phosphotransferase c0	S_cpd00002[c] + S_cpd00296[c] <=> S_cpd00008[c] + S_cpd00295[c]	(CAETHG_RS16375)	CAETHG_RS16375		MLST|Purine conversions	1	-1000	1000	2.7.4.12,2.7.4.8	ATP + dGMP <=> ADP + dGDP		0	0	0	0	0	0	0	0	0	0	0	0	0	0	0	0	0	0	0	0	0	0	0	0	0	0	0	0	0	0	0	0	0	0	0	0	0
rxn05414_c0	6-methyl-3-oxo-heptanoyl-ACP:NADP+ oxidoreductase c0	S_cpd00005[c] + S_cpd00067[c] + S_cpd11550[c] <=> S_cpd00006[c] + S_cpd11551[c]	((CAETHG_RS08435) or (CAETHG_RS00375) or (CAETHG_RS00860) or (CAETHG_RS04365) or (CAETHG_RS06705) or (CAETHG_RS03500) or (CAETHG_RS04680) or (CAETHG_RS09990))	CAETHG_RS00375 CAETHG_RS00860 CAETHG_RS03500 CAETHG_RS04365 CAETHG_RS04680 CAETHG_RS06705 CAETHG_RS08435 CAETHG_RS09990		mycolic acid synthesis|Fatty Acid Biosynthesis FASII	1	-1000	1000	1.1.1.0	NADPH + H+ + 6-methyl-3-oxo-heptanoyl-ACP <=> NADP + 6-methyl-3-hydroxy-heptanoyl-ACP		0	0	0	0	0	0	0	0	0	0	0	0	0	0	0	0	0	0	0	0	0	0	0	0	0	0	0	0	0	0	0	0	0	0	0	0	0
rxn00789_c0	1-(5-Phospho-D-ribosyl)-ATP:pyrophosphate phosphoribosyl-transferase c0	S_cpd00002[c] + S_cpd00103[c] -> S_cpd00012[c] + S_cpd01775[c]	((CAETHG_RS15995) or (() and (CAETHG_RS15990)))	CAETHG_RS15990 CAETHG_RS15995		Histidine Biosynthesis	0	0	1000	2.4.2.17	ATP + PRPP -> PPi + Phosphoribosyl-ATP		0.000822232	0.000822232	0.000822232	0.000842286	0.000827245	8.68382e-06	0.000842286	0.000842286	0.000822232	0.000842286	0.000837272	8.68382e-06	0.000822232	0.000842286	0.000832259	1.00272e-05	0.000842286	0.000822232	0.000832259	1.00272e-05	0.000822232	0.000822232	0.000822232	0.000822232	1.0842e-19	0.000842286	0.000842286	0.000842286	0.000862341	0.0008473	8.68382e-06	0.000842286	0.000842286	0.000842286	0	0.000401089	0.000393067
rxn10481_c0	Copper transport via ABC system c0	S_cpd00001[c] + S_cpd00002[c] + S_cpd00058[e] -> S_cpd00008[c] + S_cpd00009[c] + S_cpd00058[c] + S_cpd00067[c]	((CAETHG_RS04295) or (CAETHG_RS02640))	CAETHG_RS02640 CAETHG_RS04295		Terminal cytochrome C oxidases|Copper homeostasis|Terminal cytochrome C oxidases copy	0	0	1000		H2O + ATP + Cu2+ -> ADP + Phosphate + Cu2+ + H+		2.8413e-05	2.8413e-05	2.8413e-05	2.9106e-05	2.85863e-05	3.00078e-07	2.9106e-05	2.9106e-05	2.8413e-05	2.9106e-05	2.89328e-05	3.00078e-07	2.8413e-05	2.9106e-05	2.87595e-05	3.465e-07	2.9106e-05	2.8413e-05	2.87595e-05	3.465e-07	2.8413e-05	2.8413e-05	2.8413e-05	2.8413e-05	0	2.9106e-05	2.9106e-05	2.9106e-05	2.9799e-05	2.92792e-05	3.00078e-07	2.9106e-05	2.9106e-05	2.9106e-05	0	1.386e-05	1.35828e-05
cpd00058_ext_b		S_cpd00058[e] <=>				Exchange Reactions	1	-1000	0		Cu2+ <=>		-2.8413e-05	-2.8413e-05	-2.8413e-05	-2.9106e-05	-2.85863e-05	3.00078e-07	-2.9106e-05	-2.9106e-05	-2.8413e-05	-2.9106e-05	-2.89328e-05	3.00078e-07	-2.8413e-05	-2.9106e-05	-2.87595e-05	3.465e-07	-2.9106e-05	-2.8413e-05	-2.87595e-05	3.465e-07	-2.8413e-05	-2.8413e-05	-2.8413e-05	-2.8413e-05	0	-2.9106e-05	-2.9106e-05	-2.9106e-05	-2.9799e-05	-2.92793e-05	3.00078e-07	-2.9106e-05	-2.9106e-05	-2.9106e-05	0	-1.386e-05	-1.35828e-05
rxn02895_c0	5-Phospho-D-ribosylamine:glycine ligase (ADP-forming) c0	S_cpd00002[c] + S_cpd00033[c] + S_cpd01982[c] -> S_cpd00008[c] + S_cpd00009[c] + S_cpd00067[c] + S_cpd02394[c]	(CAETHG_RS14520)	CAETHG_RS14520		De Novo Purine Biosynthesis	0	0	1000	6.3.4.13	ATP + Glycine + 5-Phosphoribosylamine -> ADP + Phosphate + H+ + GAR		0.00878687	0.00878687	0.00878687	0.00900118	0.00884045	9.28006e-05	0.00900118	0.00900118	0.00878687	0.00900118	0.0089476	9.28006e-05	0.00878687	0.00900118	0.00889402	0.000107157	0.00900118	0.00878687	0.00889402	0.000107157	0.00878687	0.00878687	0.00878687	0.00878687	8.64005e-14	0.00900118	0.00900118	0.00900118	0.0092155	0.00905476	9.28006e-05	0.00900118	0.00900118	0.00900118	1.42109e-14	0.00428628	0.00420055
rxn10216_c0	isotetradecanoyl-1-acylglycerol-3-phosphate O-acyltransferase c0	S_cpd11435[c] + S_cpd15673[c] -> S_cpd00010[c] + S_cpd15679[c]	((CAETHG_RS13530) or (CAETHG_RS08580))	CAETHG_RS08580 CAETHG_RS13530		Phosphate metabolism|Glycerolipid and Glycerophospholipid Metabolism in Bacteria	0	0	1000	2.3.1.51	fa1coa + 1-isotetradecanoyl-sn-glycerol 3-phosphate -> CoA + 1,2-diisotetradecanoyl-sn-glycerol 3-phosphate		0	0	0	0	0	0	0	0	0	0	0	0	0	0	0	0	0	0	0	0	0	0	0	0	0	0	0	0	0	0	0	0	0	0	0	0	0
rxn09211_c0	Phosphatidylserine syntase (n-C18:1) c0	S_cpd00054[c] + S_cpd15420[c] -> S_cpd00046[c] + S_cpd00067[c] + S_cpd15558[c]	(CAETHG_RS11850)	CAETHG_RS11850		Glycerolipid and Glycerophospholipid Metabolism in Bacteria	0	0	1000	2.7.8.8	L-Serine + CDP-1,2-dioctadec-11-enoylglycerol -> CMP + H+ + phosphatidylserine dioctadec-11-enoyl		0	0	0	0	0	0	0	0	0	0	0	0	0	0	0	0	0	0	0	0	0	0	0	0	0	0	0	0	0	0	0	0	0	0	0	0	0
rxn01115_c0	6-Phospho-D-gluconate:NADP+ 2-oxidoreductase (decarboxylating) c0	S_cpd00006[c] + S_cpd00284[c] -> S_cpd00005[c] + S_cpd00011[c] + S_cpd00171[c]	(CAETHG_RS15955)	CAETHG_RS15955		Pentose Phosphate Pathway	0	0	1000	1.1.1.44/1.1.1.343	NADP + 6-Phospho-D-gluconate -> NADPH + CO2 + D-Ribulose5-phosphate		0	0	0	0	0	0	0	0	0	0	0	0	0	0	0	0	0	0	0	0	0	0	0	0	0	0	0	0	0	0	0	0	0	0	0	0	0
rxn02312_c0	S-Adenosyl-L-methionine:8-amino-7-oxononanoate aminotransferase c0	S_cpd00017[c] + S_cpd00800[c] <=> S_cpd00764[c] + S_cpd02701[c]	(CAETHG_RS07210)	CAETHG_RS07210		Biotin biosynthesis	1	-1000	1000	2.6.1.62	S-Adenosyl-L-methionine + 8-Amino-7-oxononanoate <=> 7-8-Diaminononanoate + S-Adenosyl-4-methylthio-2-oxobutanoate		0	0	0	0	0	0	0	0	0	0	0	0	0	0	0	0	0	0	0	0	0	0	0	0	0	0	0	0	0	0	0	0	0	0	0	0	0
rxn05405_c0	15-methyl-3-oxo-hexa-decanoyl-ACP:NADP+ oxidoreductase c0	S_cpd00005[c] + S_cpd00067[c] + S_cpd11541[c] <=> S_cpd00006[c] + S_cpd11542[c]	((CAETHG_RS08435) or (CAETHG_RS00375) or (CAETHG_RS00860) or (CAETHG_RS04365) or (CAETHG_RS06705) or (CAETHG_RS03500) or (CAETHG_RS04680) or (CAETHG_RS09990))	CAETHG_RS00375 CAETHG_RS00860 CAETHG_RS03500 CAETHG_RS04365 CAETHG_RS04680 CAETHG_RS06705 CAETHG_RS08435 CAETHG_RS09990		mycolic acid synthesis|Fatty Acid Biosynthesis FASII	1	-1000	1000	1.1.1.0	NADPH + H+ + 15-methyl-3-oxo-hexa-decanoyl-ACP <=> NADP + 15-methyl-3-hydroxy-hexa-decanoyl-ACP		0	0	0	0	0	0	0	0	0	0	0	0	0	0	0	0	0	0	0	0	0	0	0	0	0	0	0	0	0	0	0	0	0	0	0	0	0
rxn03951_c0	NAD-dependent threonine 4-phosphate dehydrogenase c0	S_cpd00003[c] + S_cpd03607[c] <=> S_cpd00004[c] + S_cpd00067[c] + S_cpd04539[c]	(CAETHG_RS12050)	CAETHG_RS12050		Pyridoxin (Vitamin B6) Biosynthesis	1	-1000	1000	1.1.1.262	NAD + 4-(Phosphonooxy)-threonine <=> NADH + H+ + 2-Amino-3-oxo-4-phosphonooxybutyrate		0	0	0	0	0	0	0	0	0	0	0	0	0	0	0	0	0	0	0	0	0	0	0	0	0	0	0	0	0	0	0	0	0	0	0	0	0
rxn10276_c0	isotetradecanoyl-UDP-glucosyltransferase (diglucosyl) c0	S_cpd00026[c] + S_cpd15742[c] <=> S_cpd00014[c] + S_cpd15733[c]	(CAETHG_RS11420)	CAETHG_RS11420		Teichoic and lipoteichoic acids biosynthesis	1	-1000	1000		UDP-glucose + Monoglucosyl-1,2 diisotetradecanoylglycerol <=> UDP + Diglucosyl-1,2 diisotetradecanoylglycerol		0	0	0	0	0	0	0	0	0	0	0	0	0	0	0	0	0	0	0	0	0	0	0	0	0	0	0	0	0	0	0	0	0	0	0	0	0
rxn10344_c0	Lead (Pb+2) ABC transporter c0	S_cpd00001[c] + S_cpd00002[c] + S_cpd04097[c] -> S_cpd00008[c] + S_cpd00009[c] + S_cpd00067[c] + S_cpd04097[e]	((CAETHG_RS04295) or (CAETHG_RS02640))	CAETHG_RS02640 CAETHG_RS04295			0	0	1000		H2O + ATP + Pb -> ADP + Phosphate + H+ + Pb		0	0	0	0	0	0	0	0	0	0	0	0	0	0	0	0	0	0	0	0	0	0	0	0	0	0	0	0	0	0	0	0	0	0	0	0	0
rxn00365_c0	ATP:cytidine 5'-phosphotransferase c0	S_cpd00002[c] + S_cpd00367[c] -> S_cpd00008[c] + S_cpd00046[c]	(CAETHG_RS11755)	CAETHG_RS11755		Pyrimidine conversions	0	0	1000	2.7.1.48	ATP + Cytidine -> ADP + CMP		0	0	0	0	0	0	0	0	0	0	0	0	0	0	0	0	0	0	0	0	0	0	0	0	0	0	0	0	0	0	0	0	0	0	0	0	0
rxn05318_c0	ADNt2r c0	S_cpd00067[e] + S_cpd00182[e] <=> S_cpd00067[c] + S_cpd00182[c]	(CAETHG_RS19245)	CAETHG_RS19245		Deoxyribose and Deoxynucleoside Catabolism	1	-1000	1000		H+ + Adenosine <=> H+ + Adenosine		0	0	0	0	0	0	0	0	0	0	0	0	0	0	0	0	0	0	0	0	0	0	0	0	0	0	0	0	0	0	0	0	0	0	0	0	0
rxn10474_c0	cobalt transport in/out via permease (no H+) c0	S_cpd00149[c] <=> S_cpd00149[e]	((CAETHG_RS01345) or (CAETHG_RS14785))	CAETHG_RS01345 CAETHG_RS14785		Campylobacter Iron Metabolism	1	-1000	1000		Co2+ <=> Co2+		-1.01475e-06	-1.01475e-06	-1.01475e-06	-1.0395e-06	-1.02094e-06	1.07171e-08	-1.0395e-06	-1.0395e-06	-1.01475e-06	-1.0395e-06	-1.03331e-06	1.07171e-08	-1.01475e-06	-1.0395e-06	-1.02712e-06	1.2375e-08	-1.0395e-06	-1.01475e-06	-1.02712e-06	1.2375e-08	-1.01475e-06	-1.01475e-06	-1.01475e-06	-1.01475e-06	0	-1.0395e-06	-1.0395e-06	-1.0395e-06	-1.06425e-06	-1.04569e-06	1.0717e-08	-1.0395e-06	-1.0395e-06	-1.0395e-06	0	-4.95e-07	-4.851e-07
cpd00149_ext_b		S_cpd00149[e] <=>				Exchange Reactions	1	-1000	0		Co2+ <=>		-1.01475e-06	-1.01475e-06	-1.01475e-06	-1.0395e-06	-1.02094e-06	1.07171e-08	-1.0395e-06	-1.0395e-06	-1.01475e-06	-1.0395e-06	-1.03331e-06	1.07171e-08	-1.01475e-06	-1.0395e-06	-1.02712e-06	1.2375e-08	-1.0395e-06	-1.01475e-06	-1.02712e-06	1.2375e-08	-1.01475e-06	-1.01475e-06	-1.01475e-06	-1.01475e-06	0	-1.0395e-06	-1.0395e-06	-1.0395e-06	-1.06425e-06	-1.04569e-06	1.0717e-08	-1.0395e-06	-1.0395e-06	-1.0395e-06	0	-4.95e-07	-4.851e-07
rxn05404_c0	13-methyl-tetra-decanoyl-ACP:malonyl-[acyl-carrier-protein] C-acyltransferase (decarboxylating) c0	S_cpd00067[c] + S_cpd11492[c] + S_cpd11540[c] -> S_cpd00011[c] + S_cpd11493[c] + S_cpd11541[c]	((CAETHG_RS10005) and (CAETHG_RS09985))	CAETHG_RS09985 CAETHG_RS10005		Fatty Acid Biosynthesis FASII	0	0	1000	2.3.1.0	H+ + Malonyl-acyl-carrierprotein + 13-methyl-tetra-decanoyl-ACP -> CO2 + ACP + 15-methyl-3-oxo-hexa-decanoyl-ACP		0	0	0	0	0	0	0	0	0	0	0	0	0	0	0	0	0	0	0	0	0	0	0	0	0	0	0	0	0	0	0	0	0	0	0	0	0
rxn08550_c0	glycerol-3-phosphate acyltransferase (C16:1) c0	S_cpd00080[c] + S_cpd15239[c] -> S_cpd11493[c] + S_cpd15326[c]	(() and (CAETHG_RS16510))	CAETHG_RS16510		Glycerolipid and Glycerophospholipid Metabolism in Bacteria	0	0	1000	2.3.1.15	Glycerol-3-phosphate + Hexadecenoyl-ACP -> ACP + 1-hexadec-9-enoyl-sn-glycerol 3-phosphate		0	0	0	0	0	0	0	0	0	0	0	0	0	0	0	0	0	0	0	0	0	0	0	0	0	0	0	0	0	0	0	0	0	0	0	0	0
rxn10336_c0	stearoyl-cardiolipin synthase c0	2 S_cpd15540[c] <=> S_cpd00100[c] + S_cpd15793[c]	((CAETHG_RS14670) or (CAETHG_RS04280))	CAETHG_RS04280 CAETHG_RS14670		Glycerolipid and Glycerophospholipid Metabolism in Bacteria	1	-1000	1000		2 Phosphatidylglycerol dioctadecanoyl <=> Glycerol + Stearoylcardiolipin (B. subtilis)		0	0	0	0	0	0	0	0	0	0	0	0	0	0	0	0	0	0	0	0	0	0	0	0	0	0	0	0	0	0	0	0	0	0	0	0	0
rxn01643_c0	L-Aspartate-4-semialdehyde:NADP+ oxidoreductase (phosphorylating) c0	S_cpd00005[c] + S_cpd01977[c] -> S_cpd00006[c] + S_cpd00009[c] + S_cpd00346[c]	(CAETHG_RS06525)	CAETHG_RS06525		Aspartate degradation | Lysine, Threonine synthesis	0	0	1000	1.2.1.11	NADPH + 4-Phospho-L-aspartate -> NADP + Phosphate + L-Aspartate4-semialdehyde		0.0500187	0.0500187	0.0500187	0.0512386	0.0503236	0.000528261	0.0512386	0.0512386	0.0500187	0.0512386	0.0509336	0.000528261	0.0500187	0.0512386	0.0506286	0.000609984	0.0512386	0.0500187	0.0506286	0.000609984	0.0500187	0.0500187	0.0500187	0.0500187	8.64009e-14	0.0512386	0.0512386	0.0512386	0.0524586	0.0515436	0.000528261	0.0512386	0.0512386	0.0512386	1.42109e-14	0.0243993	0.0239114
rxn01275_c0	ATP:D-Gluconate 6-phosphotransferase c0	S_cpd00002[c] + S_cpd00222[c] <=> S_cpd00008[c] + S_cpd00284[c]	(CAETHG_RS15965)	CAETHG_RS15965		Pentose Phosphate Pathway	1	-1000	1000	2.7.1.12	ATP + GLCN <=> ADP + 6-Phospho-D-gluconate		0	0	0	0	0	0	0	0	0	0	0	0	0	0	0	0	0	0	0	0	0	0	0	0	0	0	0	0	0	0	0	0	0	0	0	0	0
rxn10257_c0	anteisopentadecanoyl-Diacylglycerol kinase c0	S_cpd00002[c] + S_cpd15705[c] <=> S_cpd00008[c] + S_cpd15681[c]	(CAETHG_RS14270)	CAETHG_RS14270		Glycerolipid and Glycerophospholipid Metabolism in Bacteria	1	-1000	1000	2.7.1.107	ATP + 1,2-Dianteisopentadecanoyl-sn-glycerol <=> ADP + 1,2-dianteisopentadecanoyl-sn-glycerol 3-phosphate		0	0	0	0	0	0	0	0	0	0	0	0	0	0	0	0	0	0	0	0	0	0	0	0	0	0	0	0	0	0	0	0	0	0	0	0	0
rxn09209_c0	Phosphatidylserine syntase (n-C16:1) c0	S_cpd00054[c] + S_cpd15418[c] -> S_cpd00046[c] + S_cpd00067[c] + S_cpd15556[c]	(CAETHG_RS11850)	CAETHG_RS11850		Glycerolipid and Glycerophospholipid Metabolism in Bacteria	0	0	1000	2.7.8.8	L-Serine + CDP-1,2-dihexadec-9-enoylglycerol -> CMP + H+ + phosphatidylserine dihexadec-9-enoyl		0	0	0	0	0	0	0	0	0	0	0	0	0	0	0	0	0	0	0	0	0	0	0	0	0	0	0	0	0	0	0	0	0	0	0	0	0
rxn02005_c0	trehalose transport via PEP:Pyr PTS c0	S_cpd00061[c] + S_cpd00794[e] <=> S_cpd00020[c] + S_cpd00523[c]	(() and () and (CAETHG_RS09185) and ())	CAETHG_RS09185		Trehalose Uptake and utilisation	1	-1000	1000	2.7.1.69	Phosphoenolpyruvate + TRHL <=> Pyruvate + Trehalose 6-phosphate		0	0	0	0	0	0	0	0	0	0	0	0	0	0	0	0	0	0	0	0	0	0	0	0	0	0	0	0	0	0	0	0	0	0	0	0	0
rxn01653_c0	5-Formyltetrahydrofolate cyclo-ligase (ADP-forming) c0	S_cpd00002[c] + S_cpd02197[c] -> S_cpd00008[c] + S_cpd00009[c] + S_cpd00347[c]	(CAETHG_RS01355)	CAETHG_RS01355		Folate Biosynthesis|Folate Biosynthesis (Phoenix Copy)|Folate transporters|5-FCL-like protein|One-carbon metabolism by tetrahydropterines|Serine-glyoxylate cycle	0	0	1000	6.3.3.2	ATP + 5-Formyltetrahydrofolate -> ADP + Phosphate + 5-10-Methenyltetrahydrofolate		0	0	0	0	0	0	0	0	0	0	0	0	0	0	0	0	0	0	0	0	0	0	0	0	0	0	0	0	0	0	0	0	0	0	0	0	0
rxn08656_c0	Glycolate oxidase c0	S_cpd00139[c] + S_cpd15500[c] -> S_cpd00040[c] + S_cpd15499[c]	(() and ((CAETHG_RS01815) or (CAETHG_RS13190) or (CAETHG_RS01160) or (CAETHG_RS00560) or (CAETHG_RS17055)) and ())	CAETHG_RS00560 CAETHG_RS01160 CAETHG_RS01815 CAETHG_RS13190 CAETHG_RS17055		Photorespiration (oxidative C2 cycle)|Glycolate, glyoxylate interconversions	0	0	1000		Glycolate + Menaquinone 8 -> Glyoxalate + Menaquinol 8		0	0	0	0	0	0	0	0	0	0	0	0	0	0	0	0	0	0	0	0	0	0	0	0	0	0	0	0	0	0	0	0	0	0	0	0	0
rxn01029_c0	Agmatine iminohydrolase c0	S_cpd00001[c] + S_cpd00152[c] -> S_cpd00013[c] + S_cpd00341[c]	(CAETHG_RS10145)	CAETHG_RS10145		Polyamine Metabolism|Arginine and Ornithine Degradation	0	0	1000	3.5.3.12	H2O + Agmatine -> NH3 + N-Carbamoylputrescine		0	0	0	0	0	0	0	0	0	0	0	0	0	0	0	0	0	0	0	0	0	0	0	0	0	0	0	0	0	0	0	0	0	0	0	0	0
rxn09198_c0	Phosphatidylserine decarboxylase (n-C14:0) c0	2 S_cpd00067[c] + S_cpd15553[c] <=> S_cpd00011[c] + S_cpd15529[c]	(CAETHG_RS10720)	CAETHG_RS10720		Glycerolipid and Glycerophospholipid Metabolism in Bacteria|Bacterial cyanide production and tolerance mechanisms	1	-1000	1000	4.1.1.65	2 H+ + phosphatidylserine ditetradecanoyl <=> CO2 + phosphatidylethanolamine ditetradecanoyl		0	0	0	0	0	0	0	0	0	0	0	0	0	0	0	0	0	0	0	0	0	0	0	0	0	0	0	0	0	0	0	0	0	0	0	0	0
rxn01362_c0	Orotidine-5'-phosphate:pyrophosphate phosphoribosyltransferase c0	S_cpd00103[c] + S_cpd00247[c] -> S_cpd00012[c] + S_cpd00810[c]	(CAETHG_RS07105)	CAETHG_RS07105		De Novo Pyrimidine Synthesis|YgfZ	0	0	1000	2.4.2.10	PRPP + Orotate -> PPi + Orotidylic acid		0.00983736	0.00983736	0.00983736	0.0100773	0.00989734	0.000103895	0.0100773	0.0100773	0.00983736	0.0100773	0.0100173	0.000103895	0.00983736	0.0100773	0.00995733	0.000119968	0.0100773	0.00983736	0.00995733	0.000119968	0.00983736	0.00983736	0.00983736	0.00983736	5.93682e-16	0.0100773	0.0100773	0.0100773	0.0103172	0.0101373	0.000103895	0.0100773	0.0100773	0.0100773	0	0.00479871	0.00470274
rxn06493_c0	dihydrolipoylprotein:NAD+ oxidoreductase c0	S_cpd00003[c] + S_cpd12225[c] <=> S_cpd00004[c] + S_cpd00067[c] + S_cpd12005[c]	((CAETHG_RS07825) or (((CAETHG_RS02265) or (CAETHG_RS18030) or (CAETHG_RS07795)) and (CAETHG_RS02260) and (CAETHG_RS02255)) or (((CAETHG_RS02265) or (CAETHG_RS18030) or (CAETHG_RS07795)) and ()))	CAETHG_RS02255 CAETHG_RS02260 CAETHG_RS02265 CAETHG_RS07795 CAETHG_RS07825 CAETHG_RS18030		Glycine cleage system	1	-1000	1000	1.8.1.4	NAD + Dihydrolipolprotein <=> NADH + H+ + Lipoylprotein		0	0	0	0	0	0	0	0	0	0	0	0	0	0	0	0	0	0	0	0	0	0	0	0	0	0	0	0	0	0	0	0	0	0	0	0	0
rxn02402_c0	Nicotinate-nucleotide:pyrophosphate phosphoribosyltransferase c0	2 S_cpd00067[c] + S_cpd00103[c] + S_cpd02333[c] -> S_cpd00011[c] + S_cpd00012[c] + S_cpd00873[c]	((CAETHG_RS11775) or (CAETHG_RS02385))	CAETHG_RS02385 CAETHG_RS11775		NAD and NADP cofactor biosynthesis global|NAD regulation	0	0	1000	2.4.2.19	2 H+ + PRPP + Quinolinate -> CO2 + PPi + Nicotinate ribonucleotide		3.6328e-05	3.63281e-05	3.6328e-05	3.72141e-05	3.65496e-05	3.83671e-07	3.72141e-05	3.72141e-05	3.63281e-05	3.72141e-05	3.69926e-05	3.83671e-07	3.6328e-05	3.72141e-05	3.67711e-05	4.43025e-07	3.72141e-05	3.6328e-05	3.67711e-05	4.43025e-07	3.6328e-05	3.63281e-05	3.63281e-05	3.6328e-05	8.0109e-15	3.72141e-05	3.72141e-05	3.72141e-05	3.81001e-05	3.74356e-05	3.83671e-07	3.72141e-05	3.72141e-05	3.72141e-05	1.42116e-14	1.7721e-05	1.73666e-05
rxn03243_c0	Decanoyl-CoA:acetyl-CoA C-acyltransferase c0	S_cpd00022[c] + S_cpd03128[c] <=> S_cpd00010[c] + S_cpd03117[c]	(CAETHG_RS02035)	CAETHG_RS02035		Isobutyryl-CoA to Propionyl-CoA Module|Isoleucine degradation|Branched chain amino acid degradation regulons	1	-1000	1000	2.3.1.16	Acetyl-CoA + Decanoyl-CoA <=> CoA + 3-Oxododecanoyl-CoA		0	0	0	0	0	0	0	0	0	0	0	0	0	0	0	0	0	0	0	0	0	0	0	0	0	0	0	0	0	0	0	0	0	0	0	0	0
rxn05375_c0	10-methyl-dodecanoyl-ACP:malonyl-[acyl-carrier-protein] C-acyltransferase (decarboxylating) c0	S_cpd00067[c] + S_cpd11492[c] + S_cpd11511[c] -> S_cpd00011[c] + S_cpd11493[c] + S_cpd11512[c]	((CAETHG_RS10005) and (CAETHG_RS09985))	CAETHG_RS09985 CAETHG_RS10005		Fatty Acid Biosynthesis FASII	0	0	1000	2.3.1.0	H+ + Malonyl-acyl-carrierprotein + 10-methyl-dodecanoyl-ACP -> CO2 + ACP + 12-methyl-3-oxo-tetra-decanoyl-ACP		0	0	0	0	0	0	0	0	0	0	0	0	0	0	0	0	0	0	0	0	0	0	0	0	0	0	0	0	0	0	0	0	0	0	0	0	0
rxn10224_c0	anteisopentadecanoyl-phosphatidate cytidylyltransferase c0	S_cpd00052[c] + S_cpd15681[c] <=> S_cpd00012[c] + S_cpd15687[c]	(CAETHG_RS16645)	CAETHG_RS16645		Glycerolipid and Glycerophospholipid Metabolism in Bacteria	1	-1000	1000	2.7.7.41	CTP + 1,2-dianteisopentadecanoyl-sn-glycerol 3-phosphate <=> PPi + CDP-1,2-dianteisopentadecanoylglycerol		0	0	0	0	0	0	0	0	0	0	0	0	0	0	0	0	0	0	0	0	0	0	0	0	0	0	0	0	0	0	0	0	0	0	0	0	0
rxn10231_c0	isohexadecanoyl-CDPdiacylglycerol-serine O-phosphatidyltransferase c0	S_cpd00054[c] + S_cpd15688[c] -> S_cpd00046[c] + S_cpd00067[c] + S_cpd15694[c]	(CAETHG_RS11850)	CAETHG_RS11850		Glycerolipid and Glycerophospholipid Metabolism in Bacteria	0	0	1000	2.7.8.8	L-Serine + CDP-1,2-diisohexadecanoylglycerol -> CMP + H+ + Diisohexadecanoylphosphatidylserine		0	0	0	0	0	0	0	0	0	0	0	0	0	0	0	0	0	0	0	0	0	0	0	0	0	0	0	0	0	0	0	0	0	0	0	0	0
rxn02811_c0	3-Isopropylmalate hydro-lyase c0	S_cpd02693[c] <=> S_cpd00001[c] + S_cpd01710[c]	((CAETHG_RS14750) and (CAETHG_RS14755))	CAETHG_RS14750 CAETHG_RS14755		Leucine biosynthesis	1	-1000	1000	4.2.1.33	3-Isopropylmalate <=> H2O + 2-Isopropylmaleate		-0.00856853	-0.00856853	-0.00856853	-0.00877752	-0.00862078	9.04947e-05	-0.00877752	-0.00877752	-0.00856853	-0.00877752	-0.00872527	9.04947e-05	-0.00856853	-0.00877752	-0.00867302	0.000104494	-0.00877752	-0.00856853	-0.00867302	0.000104494	-0.00856853	-0.00856853	-0.00856853	-0.00856853	0	-0.00877752	-0.00877752	-0.00877752	-0.00898651	-0.00882976	9.04947e-05	-0.00877752	-0.00877752	-0.00877752	0	-0.00417977	-0.00409617
rxn10262_c0	isopentadecanoyl-CDPdiacylglycerol:sn-glycerol-3-phosphate 3-phosphatidyltransferase c0	S_cpd00080[c] + S_cpd15686[c] <=> S_cpd00046[c] + S_cpd15719[c]	((CAETHG_RS16745) or (CAETHG_RS06675))	CAETHG_RS06675 CAETHG_RS16745		Glycerolipid and Glycerophospholipid Metabolism in Bacteria	1	-1000	1000	2.7.8.5	Glycerol-3-phosphate + CDP-1,2-diisopentadecanoylglycerol <=> CMP + Diisopentadecanoylphosphatidylglycerophosphate		0	0	0	0	0	0	0	0	0	0	0	0	0	0	0	0	0	0	0	0	0	0	0	0	0	0	0	0	0	0	0	0	0	0	0	0	0
rxn05610_c0	D-mannose transport via PEP:Pyr PTS c0	S_cpd00061[c] + S_cpd00138[e] <=> S_cpd00020[c] + S_cpd00235[c]	(() and () and () and (CAETHG_RS09185) and ())	CAETHG_RS09185		Mannose Metabolism|Sialic Acid Metabolism	1	-1000	1000		Phosphoenolpyruvate + D-Mannose <=> Pyruvate + D-mannose-6-phosphate		0	0	0	0	0	0	0	0	0	0	0	0	0	0	0	0	0	0	0	0	0	0	0	0	0	0	0	0	0	0	0	0	0	0	0	0	0
rxn01019_c0	Carbamoyl-phosphate:L-ornithine carbamoyltransferase c0	S_cpd00064[c] + S_cpd00146[c] <=> S_cpd00009[c] + 2 S_cpd00067[c] + S_cpd00274[c]	((CAETHG_RS02810) or (CAETHG_RS02140) or (CAETHG_RS14860))	CAETHG_RS02140 CAETHG_RS02810 CAETHG_RS14860		Arginine Deiminase Pathway	1	-1000	1000	2.1.3.3	Ornithine + Carbamoylphosphate <=> Phosphate + 2 H+ + Citrulline		0.00188483	0.00188483	0.00188483	0.0019308	0.00189632	1.99062e-05	0.0019308	0.0019308	0.00188483	0.0019308	0.0019193	1.99062e-05	0.00188483	0.0019308	0.00190781	2.29857e-05	0.0019308	0.00188483	0.00190781	2.29857e-05	0.00188483	0.00188483	0.00188483	0.00188483	0	0.0019308	0.0019308	0.0019308	0.00197677	0.00194229	1.99062e-05	0.0019308	0.0019308	0.0019308	0	0.000919427	0.000901039
rxn00412_c0	UTP:ammonia ligase(ADP-forming) c0	S_cpd00001[c] + S_cpd00002[c] + S_cpd00053[c] + S_cpd00062[c] -> S_cpd00008[c] + S_cpd00009[c] + S_cpd00023[c] + S_cpd00052[c] + 2 S_cpd00067[c]	(CAETHG_RS11440)	CAETHG_RS11440		Pyrimidine conversions	0	0	1000	6.3.4.2	H2O + ATP + L-Glutamine + UTP -> ADP + Phosphate + L-Glutamate + CTP + 2 H+		0	0	0	0	0	0	0	0	0	0	0	0	0	0	0	0	0	0	0	0	0	0	0	0	0	0	0	0	0	0	0	0	0	0	0	0	0
rxn03167_c0	2-Amino-4-hydroxy-6-(erythro-1,2,3-trihydroxypropyl) c0	3 S_cpd00001[c] + S_cpd02978[c] -> 3 S_cpd00009[c] + 3 S_cpd00067[c] + S_cpd02961[c]	(CAETHG_RS13410)	CAETHG_RS13410		P uptake (cyanobacteria)|Phosphate metabolism	0	0	1000	3.1.3.1	3 H2O + 7,8-Dihydroneopterin 3-triphosphate -> 3 Phosphate + 3 H+ + Dihydroneopterin		3.6531e-05	3.6531e-05	3.6531e-05	3.7422e-05	3.67538e-05	3.85814e-07	3.7422e-05	3.7422e-05	3.6531e-05	3.7422e-05	3.71993e-05	3.85814e-07	3.6531e-05	3.7422e-05	3.69765e-05	4.455e-07	3.7422e-05	3.6531e-05	3.69765e-05	4.455e-07	3.6531e-05	3.6531e-05	3.6531e-05	3.6531e-05	0	3.7422e-05	3.7422e-05	3.7422e-05	3.8313e-05	3.76447e-05	3.85814e-07	3.7422e-05	3.7422e-05	3.7422e-05	0	1.782e-05	1.74636e-05
rxn08310_c0	CDP-diacylglycerol synthetase (n-C16:1) c0	S_cpd00052[c] + S_cpd15525[c] <=> S_cpd00012[c] + S_cpd15418[c]	(CAETHG_RS16645)	CAETHG_RS16645		Glycerolipid and Glycerophospholipid Metabolism in Bacteria	1	-1000	1000	2.7.7.41	CTP + 1,2-dihexadec-9-enoyl-sn-glycerol 3-phosphate <=> PPi + CDP-1,2-dihexadec-9-enoylglycerol		0	0	0	0	0	0	0	0	0	0	0	0	0	0	0	0	0	0	0	0	0	0	0	0	0	0	0	0	0	0	0	0	0	0	0	0	0
rxn03135_c0	Imidazole-glycerol-3-phosphate synthase c0	S_cpd00053[c] + S_cpd02991[c] -> S_cpd00023[c] + S_cpd00067[c] + S_cpd02843[c] + S_cpd02851[c]	((CAETHG_RS16025) and (CAETHG_RS16010))	CAETHG_RS16010 CAETHG_RS16025		Histidine Biosynthesis	0	0	1000	2.4.2.-	L-Glutamine + phosphoribulosylformimino-AICAR-phosphate -> L-Glutamate + H+ + D-erythro-imidazol-glycerol-phosphate + AICAR		0.000822232	0.000822232	0.000822232	0.000842286	0.000827245	8.68382e-06	0.000842286	0.000842286	0.000822232	0.000842286	0.000837272	8.68382e-06	0.000822232	0.000842286	0.000832259	1.00272e-05	0.000842286	0.000822232	0.000832259	1.00272e-05	0.000822232	0.000822232	0.000822232	0.000822232	1.0842e-19	0.000842286	0.000842286	0.000842286	0.000862341	0.0008473	8.68382e-06	0.000842286	0.000842286	0.000842286	0	0.000401089	0.000393067
rxn00469_c0	N2-Acetyl-L-ornithine amidohydrolase c0	S_cpd00001[c] + S_cpd00342[c] <=> S_cpd00029[c] + S_cpd00064[c]	((CAETHG_RS04740) or (CAETHG_RS02125))	CAETHG_RS02125 CAETHG_RS04740		Arginine biosynthesis	1	-1000	1000	3.5.1.16	H2O + N-Acetylornithine <=> Acetate + Ornithine		0	0	0	0	0	0	0	0	0	0	0	0	0	0	0	0	0	0	0	0	0	0	0	0	0	0	0	0	0	0	0	0	0	0	0	0	0
rxn05655_c0	sucrose transport via PEP:Pyr PTS c0	S_cpd00061[c] + S_cpd00076[e] <=> S_cpd00020[c] + S_cpd01693[c]	(() and (CAETHG_RS09185) and () and ())	CAETHG_RS09185		HPr catabolite repression system|Galactose-inducible PTS|Fructose and Mannose Inducible PTS|Sucrose-specific PTS|Mannitol utilisation	1	-1000	1000		Phosphoenolpyruvate + Sucrose <=> Pyruvate + 6-Phosphosucrose		0	0	0	0	0	0	0	0	0	0	0	0	0	0	0	0	0	0	0	0	0	0	0	0	0	0	0	0	0	0	0	0	0	0	0	0	0
[truncated: 342 more rows]
[truncated: 67 more columns]

## Sheet: Table S12
Metabolite name in GEM iCLAU786	Metabolite description	Metabolite charged formula
S_12dgr_CA[c]	1,2-Diacyl-sn-glycerol	C35.7H68.8O5
S_1ag3p_CA[c]	1-Acyl-sn-glycerol 3-phosphate	C19.35H37.9O7P
S_c17cycACP[c]	Phospholipid components (C17)	C28H51N2O8PSR
S_c19cycACP[c]	Phospholipid components (C19)	C30H55N2O8PSR
[truncated: 1,090 more rows]
